# Supplementary material for: A generic, cost-effective, and scalable cell lineage analysis platform
Source: HighWire-hosted journal article supplement (doi:10.1101/gr.202903.115), 2016-08-24
Supplement: Supplemental_Table_S1_and_S2.xlsx [file Supplemental_Table_S1_and_S2.xlsx]

## Sheet: S1
Target name	Basic Unit Type	Expected Number of repeats	Chromosome	Target location on Chromosome - start	Target location on Chromosome - end	Primer sequence - Fw	Primer sequence - Rev
Seq1048	GT	29	X	113620568	113620625	CTACACGACGCTCTTCCGATCTTCTGAATGGTAGTCTATGCACGC	CAGACGTGTGCTCTTCCGATCTTACTGGGTCACTCTTGCTAGGTC
Seq1441	TC	28	X	124791427	124791482	CTACACGACGCTCTTCCGATCTTATTCCCCTCTCCCCTCTCTTCT	CAGACGTGTGCTCTTCCGATCTTGTACCTGGAGTGTAGCTACTGG
Seq1477	AG	28	X	141834068	141834123	CTACACGACGCTCTTCCGATCTCCTCTTGTGTTCAGAATGGGAAT	CAGACGTGTGCTCTTCCGATCTATGTGTCTAACGGAAAACAGCGT
Seq1743	TC	27	X	72657425	72657478	CTACACGACGCTCTTCCGATCTTAGGGAGATGAGAACTGCAGGAG	CAGACGTGTGCTCTTCCGATCTTGCATTTTGTAATGCTAACACACTACC
Seq1904	TC	27	X	125910067	125910120	CTACACGACGCTCTTCCGATCTGAGATCACTTCAGGCAAGTAGGC	CAGACGTGTGCTCTTCCGATCTTCACAGGAGTCTGTTATGCTCAA
Seq2016	AG	27	X	155464129	155464182	CTACACGACGCTCTTCCGATCTACTCAGAAGAACCAGGGATGTTT	CAGACGTGTGCTCTTCCGATCTTTCTGGATTTCAGTGTGTCTCAG
Seq2049	AG	27	X	164201195	164201248	CTACACGACGCTCTTCCGATCTCTTGTGAAGGTTTCGACCCAGAA	CAGACGTGTGCTCTTCCGATCTACTGTGATACCTCATGGCTCCTT
Seq2186	AC	26	X	35580220	35580271	CTACACGACGCTCTTCCGATCTGGAAACACCAAACCAAAAGGGTT	CAGACGTGTGCTCTTCCGATCTATTCTCAGGCCCCCAGTAGATAG
Seq2223	AC	26	X	42627917	42627968	CTACACGACGCTCTTCCGATCTACATACATACGCATTCACATAAACAT	CAGACGTGTGCTCTTCCGATCTGGCGCATAAACCGTGTTCATATT
Seq22448	TCT	28	X	81216079	81216162	CTACACGACGCTCTTCCGATCTGGAAGATGGAAGATCCTGTGTCG	CAGACGTGTGCTCTTCCGATCTGTATCTAGAAACTGCTCATGCCT
Seq22530	TTC	26	X	18825547	18825624	CTACACGACGCTCTTCCGATCTATCCACAGCTCCAACATTAGCTC	CAGACGTGTGCTCTTCCGATCTCAAACTTGCTTTGGCCTCACAAA
Seq2332	GA	26	X	66341394	66341445	CTACACGACGCTCTTCCGATCTTGTTCACAAACACACACAAACCC	CAGACGTGTGCTCTTCCGATCTAGCAGAGGCTAGTTTAGAGAACA
Seq2356	TC	26	X	72346232	72346283	CTACACGACGCTCTTCCGATCTCACGCCCAAGGTTTGAAAAGAAA	CAGACGTGTGCTCTTCCGATCTCAAACACCACACACACAGAGAGA
Seq2487	AG	26	X	102346757	102346808	CTACACGACGCTCTTCCGATCTAATTCCGATCATTCTCAACGGCT	CAGACGTGTGCTCTTCCGATCTGGCGTAATGACCTGACTCTCATC
Seq2649	TC	26	X	137915263	137915314	CTACACGACGCTCTTCCGATCTATATGCCCACAACACTATCCCTG	CAGACGTGTGCTCTTCCGATCTTGGAGAAACAAGAACGCTCCATT
Seq2773	AG	26	X	164431818	164431869	CTACACGACGCTCTTCCGATCTTGGGGCATAATGAACCTCACCTA	CAGACGTGTGCTCTTCCGATCTAGGAAAGCACAGAAAATGGCCTA
Seq2806	GA	25	X	9918288	9918337	CTACACGACGCTCTTCCGATCTCAGGAAGGCATGATGCTGGATAG	CAGACGTGTGCTCTTCCGATCTTTGATCAACTTGCTTGGTCCACA
Seq2924	AG	25	X	34360041	34360090	CTACACGACGCTCTTCCGATCTCACACAGCGGCACTAGTGTAT	CAGACGTGTGCTCTTCCGATCTGTTGCGCATGGATGTGTGTG
Seq3139	GA	25	X	74814544	74814593	CTACACGACGCTCTTCCGATCTATGGGAAAGATGATGCGCTTTGA	CAGACGTGTGCTCTTCCGATCTTTCCGACAGAAACAGAGATTGGC
Seq366	TC	32	X	118678778	118678841	CTACACGACGCTCTTCCGATCTTCCTGTTGCATGTATGTATATTCCTT	CAGACGTGTGCTCTTCCGATCTTGAAGGATCACCCTTGGGAGAAA
Seq400	TC	32	X	140040255	140040318	CTACACGACGCTCTTCCGATCTTGACTGGACATATGAGCTGTGGA	CAGACGTGTGCTCTTCCGATCTAGTTATGTGCACCTTGCTTGACA
Seq511	TC	31	X	84130254	84130315	CTACACGACGCTCTTCCGATCTACCCAAAGTCCCACTCTCTGATT	CAGACGTGTGCTCTTCCGATCTTGGTCATTGGGTTAGAAATTGCCT
Seq564	GA	31	X	130186386	130186447	CTACACGACGCTCTTCCGATCTGGATAAGTGAGGAGTGAGTGGGA	CAGACGTGTGCTCTTCCGATCTTGCAAACTCCAGATGACTTGCTT
Seq574	TC	31	X	141071370	141071431	CTACACGACGCTCTTCCGATCTTGCAGAAAGGTTGAGATGCAGTT	CAGACGTGTGCTCTTCCGATCTGGGGTGATTAAGACAAGCTGACA
Seq653	CT	30	X	40553662	40553721	CTACACGACGCTCTTCCGATCTACAGCAGATTCTCCCCATCTTCT	CAGACGTGTGCTCTTCCGATCTTGGCTCTTTTGGCTTATTCAGGT
Seq705	GA	30	X	77973511	77973570	CTACACGACGCTCTTCCGATCTGACATCAGTGGAAGCATCGTTCT	CAGACGTGTGCTCTTCCGATCTCTCTATGAGGGTGCTCTACCACA
Seq804	TC	30	X	141326676	141326735	CTACACGACGCTCTTCCGATCTTACAGGCTTGATCCCCTGTGATA	CAGACGTGTGCTCTTCCGATCTGCAGGGAAAGCTGAGAGAGAAAG
Seq956	GA	29	X	74711893	74711950	CTACACGACGCTCTTCCGATCTGGAATGCTGAGAGTTGAAGGTCA	CAGACGTGTGCTCTTCCGATCTTAAATGCTGGGCCATCTTACCAG
Seq984	CT	29	X	90949290	90949347	CTACACGACGCTCTTCCGATCTACTGTAATCGTTTGCTCCGGTTT	CAGACGTGTGCTCTTCCGATCTAGGGAATGAGAAAGGAGGGAAGG
Seq22297	AGA	35	X	40166260	40166364	CTACACGACGCTCTTCCGATCTACCACGTACACCTGTCACATAGA	CAGACGTGTGCTCTTCCGATCTAGTTCCAGGTATTTCCTAGTCAGT
Seq364	AC	32	X	116812291	116812354	CTACACGACGCTCTTCCGATCTGGCCATGCGTAGGATTCATACAT	CAGACGTGTGCTCTTCCGATCTAGATACAGAATGGGCTAAGGACA
Seq660	CA	30	X	48352778	48352837	CTACACGACGCTCTTCCGATCTCTACTCACTGTCATTCCCCAAGC	CAGACGTGTGCTCTTCCGATCTAACAACTGTCATGGTGAGGCAAT
Seq434	AG	32	X	161958915	161958978	CTACACGACGCTCTTCCGATCTTGGTATTTAGGAGTTTGATCACAGTAT	CAGACGTGTGCTCTTCCGATCTTTTTGCCTCAAGCTTCCTTCCTT
Seq435	CT	32	X	162542640	162542703	CTACACGACGCTCTTCCGATCTCCACCCACCCCACTTCATTTTAT	CAGACGTGTGCTCTTCCGATCTGTCTGTTTGATTTGTTGAGCATTTT
Seq548	TC	31	X	118421965	118422026	CTACACGACGCTCTTCCGATCTTAACACCACTTAGCCTCCTCCTT	CAGACGTGTGCTCTTCCGATCTAAACCTGCCAAGTACATAATTTCAA
Seq1010	AC	29	X	97383607	97383664	CTACACGACGCTCTTCCGATCTGAACTCTCCCTTCCTCCCTCTTT	CAGACGTGTGCTCTTCCGATCTGCCACTTTATTGTTCTGTGTGCT
Seq1029	GT	29	X	104030421	104030478	CTACACGACGCTCTTCCGATCTCTCCCGGTTTTGCACAGAAAATC	CAGACGTGTGCTCTTCCGATCTACCTAACTTCAAGCAGCAACAAA
Seq1102	CA	29	X	139567550	139567607	CTACACGACGCTCTTCCGATCTTCCCCTTTTTATTGGTAGGATGCG	CAGACGTGTGCTCTTCCGATCTTATTGTAGGTCGTGCTTACGTGC
Seq1135	CA	29	X	154512238	154512295	CTACACGACGCTCTTCCGATCTGATGCAGGAATGGAACATGCAAC	CAGACGTGTGCTCTTCCGATCTGTACCTGGGGAAAATGTGTGCTA
Seq1503	TG	28	X	149531419	149531474	CTACACGACGCTCTTCCGATCTATGCCTAGCTTAGTCAAAGACCT	CAGACGTGTGCTCTTCCGATCTATCTCCAAGAGATGGTGTGGACT
Seq1696	TG	27	X	56350576	56350629	CTACACGACGCTCTTCCGATCTCATGCATGTGTGAGATTGTGTGC	CAGACGTGTGCTCTTCCGATCTTCTCTAGTTAGTTATTGAACTGCCTGT
Seq1818	GT	27	X	101217146	101217199	CTACACGACGCTCTTCCGATCTCTAAATCACCAGCCTGTTCACCA	CAGACGTGTGCTCTTCCGATCTCAAAAAGAACTCAATGGCCACCC
Seq1916	AC	27	X	130420593	130420646	CTACACGACGCTCTTCCGATCTTGGAAAAACACTGTCCTAGCCTG	CAGACGTGTGCTCTTCCGATCTGCTGGTAGTGACAGATCACTTGG
Seq2232	AC	26	X	44942616	44942667	CTACACGACGCTCTTCCGATCTAGTTAGTTTCATTCCCCCATCCC	CAGACGTGTGCTCTTCCGATCTCCAAACCTATGTTGCCGTTCCTA
Seq2253	GT	26	X	50565564	50565615	CTACACGACGCTCTTCCGATCTCCACTCCAAATGGAACCTCGAAA	CAGACGTGTGCTCTTCCGATCTGTCTGAAAATCACCTCATCGGCT
Seq2292	AC	26	X	59246538	59246589	CTACACGACGCTCTTCCGATCTTGACAGTAACTCACTGCTCTTCT	CAGACGTGTGCTCTTCCGATCTTACTTTACCCACAGGATGCTCCA
Seq2339	TG	26	X	68063609	68063660	CTACACGACGCTCTTCCGATCTTCTTCCATCCCCCAGGAATTGAT	CAGACGTGTGCTCTTCCGATCTCAGAGGCAGGTGTTCATACACAA
Seq2239	TG	26	X	46625187	46625238	CTACACGACGCTCTTCCGATCTCCAGTATCACCAGCACACAAGAA	CAGACGTGTGCTCTTCCGATCTGCCAAATTGCCGAGGTTGTATTC
Seq2314	GT	26	X	62302394	62302445	CTACACGACGCTCTTCCGATCTTGGGAAGTAGGAAAGAGAAGAAATGA	CAGACGTGTGCTCTTCCGATCTTCCTCTGAACTCCAGTTTGGTGA
Seq2400	CA	26	X	83689623	83689674	CTACACGACGCTCTTCCGATCTCAGTTACAGCAGATTCACTGCCT	CAGACGTGTGCTCTTCCGATCTACCCTCCAAGGTACTGAGCTTTT
Seq2539	GT	26	X	115486174	115486225	CTACACGACGCTCTTCCGATCTACAAACGTCATTTGGCAACACTC	CAGACGTGTGCTCTTCCGATCTCTGGTCCGGAATATGGTTTCCAG
Seq2652	TG	26	X	138567443	138567494	CTACACGACGCTCTTCCGATCTGGAAATTCCAGAACTCCCAGGAA	CAGACGTGTGCTCTTCCGATCTAGGCAGAGAACAATTGGCAAAGA
Seq2725	CA	26	X	156183660	156183711	CTACACGACGCTCTTCCGATCTCCTGTGCCTAACCAGTACCAATC	CAGACGTGTGCTCTTCCGATCTGTTTGACTTCCCTCCAACCATGT
Seq2789	AC	25	X	5703007	5703056	CTACACGACGCTCTTCCGATCTCTATTCCCTCCAACTCAACCTGC	CAGACGTGTGCTCTTCCGATCTTGCAGACCTGCTTACAAAGGAAA
Seq2804	AC	25	X	9309471	9309520	CTACACGACGCTCTTCCGATCTGCTATTGCATCCTGACAAAAGGC	CAGACGTGTGCTCTTCCGATCTTGCCCCAGTTTCTCTGTCTCTAT
Seq2836	GT	25	X	14264758	14264807	CTACACGACGCTCTTCCGATCTAAACCTTGTTCCTTTGCCTCCTT	CAGACGTGTGCTCTTCCGATCTTCCCTGAGATTTTAGCATGCACT
Seq2853	AC	25	X	17004865	17004914	CTACACGACGCTCTTCCGATCTAAATGTGAGTCACCATCTCCTGC	CAGACGTGTGCTCTTCCGATCTTCTAGGCTTTTATTCCATTGTTCAGT
Seq3034	CA	25	X	54223246	54223295	CTACACGACGCTCTTCCGATCTGAGTTTCAAAGTCAAGTTGCCCA	CAGACGTGTGCTCTTCCGATCTGTTCACCTGTTTCATTGCAGAGC
Seq3038	CA	25	X	54945058	54945107	CTACACGACGCTCTTCCGATCTAAAACTCTCTCTCAGTCCCCCTC	CAGACGTGTGCTCTTCCGATCTTCTTCTCAGTTTGCCAACACCTC
Seq3044	CA	25	X	56807291	56807340	CTACACGACGCTCTTCCGATCTTGGCCTGTTGTAAAGTAGAGGTTG	CAGACGTGTGCTCTTCCGATCTTCAAAGCCCTTAGAATGTCAGTCC
Seq3079	AC	25	X	63010046	63010095	CTACACGACGCTCTTCCGATCTTGGGAAGTAGAATGGAGGTACGA	CAGACGTGTGCTCTTCCGATCTGTTCAGAACAGCCTTGGGAGTAT
Seq3086	CA	25	X	64074302	64074351	CTACACGACGCTCTTCCGATCTGCTACAGCAAACAATGAACTCAGG	CAGACGTGTGCTCTTCCGATCTTTTGGCCCCCTTTTTCGTCTAAT
Seq3235	AC	25	X	95511886	95511935	CTACACGACGCTCTTCCGATCTGTGAATGATCTCTACGAGCCCAC	CAGACGTGTGCTCTTCCGATCTTTGTTTATCCTTGATCCTGCCCG
Seq3239	CA	25	X	96200899	96200948	CTACACGACGCTCTTCCGATCTTCCATCTCATGCACAAGAAGCAT	CAGACGTGTGCTCTTCCGATCTAGAACTGCTGACCTACATACTTG
Seq3421	TG	25	X	129761052	129761101	CTACACGACGCTCTTCCGATCTTGTATTTGCCCACATTCCACACA	CAGACGTGTGCTCTTCCGATCTTTGGTGCCAAGTCATCTTTACCC
Seq460	AG	31	X	36377695	36377756	CTACACGACGCTCTTCCGATCTACCTTGGTCCAAACCAATAGTTACA	CAGACGTGTGCTCTTCCGATCTACAAATTCTCTCCATCCTTTGCT
Seq535	GA	31	X	102919863	102919924	CTACACGACGCTCTTCCGATCTACCCAGTAGTTCAAAGCAACACA	CAGACGTGTGCTCTTCCGATCTAGGGCAGTTGAAGAACCAAAAGT
Seq630	CT	30	X	19735405	19735464	CTACACGACGCTCTTCCGATCTCCTTCTGTCCTGACAAAACCACA	CAGACGTGTGCTCTTCCGATCTTTTGTACACCATGCCTCTCCTTG
Seq1089	GA	29	X	132347397	132347454	CTACACGACGCTCTTCCGATCTTGAAAGCCACAAAACACTCCTGA	CAGACGTGTGCTCTTCCGATCTTTGACCCTCTGGTCCTCTGTTAG
Seq1082	TC	29	X	130081335	130081392	CTACACGACGCTCTTCCGATCTACTGCAGAATTGTTCCCTGACTC	CAGACGTGTGCTCTTCCGATCTGTGTGTGAATGCAGGTGTGAGTA
Seq1134	GA	29	X	154157585	154157642	CTACACGACGCTCTTCCGATCTGGGGAAACCACCTGTAGGAAAGA	CAGACGTGTGCTCTTCCGATCTTCACCTGGATCTGAGTCTCAACA
Seq1245	GT	28	X	47031239	47031294	CTACACGACGCTCTTCCGATCTTACTACCCTTCCACCATCTGCTC	CAGACGTGTGCTCTTCCGATCTATGGCAAATGTGAAACTGCTGTG
Seq1539	AC	28	X	161804136	161804191	CTACACGACGCTCTTCCGATCTGGCCTACATTAGTGTTTCCCCC	CAGACGTGTGCTCTTCCGATCTAAATTTGTCACTGCGGGTAGGAT
Seq1731	AC	27	X	68305707	68305760	CTACACGACGCTCTTCCGATCTGCTACATTCCTCTTCCTTCCTGC	CAGACGTGTGCTCTTCCGATCTTACCCTAGAGGTGCCTCAAACAA
Seq2053	CA	27	X	164777764	164777817	CTACACGACGCTCTTCCGATCTGCCTTTAAAAGCCAAACAGTCCC	CAGACGTGTGCTCTTCCGATCTGGCTTCCCTCCCATTTTTCCTTT
Seq2178	AC	26	X	33839446	33839497	CTACACGACGCTCTTCCGATCTAGCTTCACCAACAGATTTCAGTTAC	CAGACGTGTGCTCTTCCGATCTAGCTCAGAGTCACTGGGATTTTC
Seq2772	TC	26	X	164213854	164213905	CTACACGACGCTCTTCCGATCTCTAGACCGTGCAAGTATGCTCTC	CAGACGTGTGCTCTTCCGATCTATGCCGGCTCCTTAGCTCTATTA
Seq278	TG	32	X	8881729	8881792	CTACACGACGCTCTTCCGATCTAGAAACAGCTTAAGGGGATTGCC	CAGACGTGTGCTCTTCCGATCTATGAAAGAAGAAAGGATGCCCCC
Seq2833	GT	25	X	13638158	13638207	CTACACGACGCTCTTCCGATCTTCTCTACTCCTTCTCCCTCCCTT	CAGACGTGTGCTCTTCCGATCTACCTAGCCCAAAACAGTACCTCA
Seq3456	GT	25	X	134386944	134386993	CTACACGACGCTCTTCCGATCTATGTGGTGAGCATATCTGTGCAT	CAGACGTGTGCTCTTCCGATCTACCTGGTTTCAAATCCCTGAACC
Seq1128	GT	29	X	151750468	151750525	CTACACGACGCTCTTCCGATCTTCTGTTAGAAACCAGCTCTTCTG	CAGACGTGTGCTCTTCCGATCTGCCCTTACCACTGAGCCATATTT
Seq1159	AC	29	X	165643140	165643197	CTACACGACGCTCTTCCGATCTTCCAAGCCCCTTTCAGTCTATCA	CAGACGTGTGCTCTTCCGATCTAGCCTTTACAGCTTTGACCACAA
Seq1177	TG	28	X	10231961	10232016	CTACACGACGCTCTTCCGATCTGTCCTGATATATACACAATAGACCTGT	CAGACGTGTGCTCTTCCGATCTTCATGGCTAGTTCTCTCACCCTT
Seq1569	TC	27	X	11302917	11302970	CTACACGACGCTCTTCCGATCTCAAGCACCCTCATACACGACATA	CAGACGTGTGCTCTTCCGATCTAAGCTAGTGGCAGTGAGTGTAGA
Seq1927	TC	27	X	133657460	133657513	CTACACGACGCTCTTCCGATCTGTTCCCAAGTACCCAGTCTCAAC	CAGACGTGTGCTCTTCCGATCTCCCTTTTAACTACCGTCGAAGCA
Seq2056	GT	27	X	166398924	166398977	CTACACGACGCTCTTCCGATCTCTATGTGCCTGTGTCTGCATTCT	CAGACGTGTGCTCTTCCGATCTCTTGCCAAAGCTTGGTACAGACT
Seq2229	GT	26	X	43986672	43986723	CTACACGACGCTCTTCCGATCTCATATCTGAAGCCTGAAGCCCTG	CAGACGTGTGCTCTTCCGATCTACTCTAAGTGTGCTCATACACATCG
Seq2320	GT	26	X	63927415	63927466	CTACACGACGCTCTTCCGATCTTATCAACCCACCTACCCCCAAAA	CAGACGTGTGCTCTTCCGATCTGGGGACAACACTCAGCATTACAA
Seq2473	AC	26	X	99677783	99677834	CTACACGACGCTCTTCCGATCTCCTCATGTTGGTGAAGACCAAGT	CAGACGTGTGCTCTTCCGATCTACCCCAGCATTCTTCTCTAGTGT
Seq2618	AC	26	X	132561734	132561785	CTACACGACGCTCTTCCGATCTGGTAGTGTCTCCACTCCTCAGTT	CAGACGTGTGCTCTTCCGATCTTTTCACATAGCTGCTCCATTCCC
Seq2718	TG	26	X	153439385	153439436	CTACACGACGCTCTTCCGATCTCCGAAGGTGCATTTTCTTTTCCC	CAGACGTGTGCTCTTCCGATCTTGTGTCCAGGATTCCGAGATTGA
Seq2788	AC	25	X	5650636	5650685	CTACACGACGCTCTTCCGATCTCTGTGCTTATCCCTGTGTCAGAA	CAGACGTGTGCTCTTCCGATCTAAGTGTTTGTTAGAAGCCAGCTA
Seq2919	TG	25	X	33639083	33639132	CTACACGACGCTCTTCCGATCTGGAGTGACAAGAGGATGAAGTCC	CAGACGTGTGCTCTTCCGATCTAGTGATAGAGGAGGACACTGAATTT
Seq3366	AC	25	X	118932656	118932705	CTACACGACGCTCTTCCGATCTCAAATGGCTGCAGTTGTGGTATG	CAGACGTGTGCTCTTCCGATCTTTTAGGAAGTTGCCCAGCTGTTT
Seq461	TG	31	X	36739350	36739411	CTACACGACGCTCTTCCGATCTACAGCCAAGTTAATCTGTATGTTAC	CAGACGTGTGCTCTTCCGATCTAGCCATGTCCAATACCAAAAGGT
Seq851	GT	29	X	11139718	11139775	CTACACGACGCTCTTCCGATCTGGTGAAAGCTCAAACTCCCAGAA	CAGACGTGTGCTCTTCCGATCTTGTCACATCACATCCTGCTTCAG
Seq926	CA	29	X	56879375	56879432	CTACACGACGCTCTTCCGATCTAAAGAAAATGCCCAGACAAGTCA	CAGACGTGTGCTCTTCCGATCTACAGGCAATTAAAAACAAAGAAGCA
Seq1086	AG	29	X	131359048	131359105	CTACACGACGCTCTTCCGATCTCTCCCAACTCTTCCATTACAGCC	CAGACGTGTGCTCTTCCGATCTAACATTGTCCTCAGCTACATGCC
Seq1332	TG	28	X	83328013	83328068	CTACACGACGCTCTTCCGATCTAGGCGACATAGATTCAGAAACTCAA	CAGACGTGTGCTCTTCCGATCTCTCTCACCTGTTCCCCTTTTCAG
Seq1446	GT	28	X	127682375	127682430	CTACACGACGCTCTTCCGATCTATTATCCCAGTCTCTTGCGCTTC	CAGACGTGTGCTCTTCCGATCTTGTCAGTCATGAACCAAACTAAGGG
Seq1699	AT	27	X	56424715	56424768	CTACACGACGCTCTTCCGATCTACAGTTCACAGACATTAACTGAGTCC	CAGACGTGTGCTCTTCCGATCTTTTCCATATGCAGAGCACAGACC
Seq1842	CA	27	X	108996384	108996437	CTACACGACGCTCTTCCGATCTGAGGCTTCTTCAGGTCTTCTGC	CAGACGTGTGCTCTTCCGATCTTGCCTTCCATTTCAAAAGACACA
Seq2047	AG	27	X	163823609	163823662	CTACACGACGCTCTTCCGATCTACTACAGAGTTGCCAGAAGGAGT	CAGACGTGTGCTCTTCCGATCTGCAGAGTGCTAGTAAGTGTTTGC
Seq2470	AG	26	X	99390216	99390267	CTACACGACGCTCTTCCGATCTTGCTTAACAAGTTCAAGGCCAGT	CAGACGTGTGCTCTTCCGATCTTTGTCCCTCACTCCCAAGATGAT
Seq2547	AG	26	X	117398710	117398761	CTACACGACGCTCTTCCGATCTTAATTAGAGTCCCGTGCTTTGGC	CAGACGTGTGCTCTTCCGATCTTGATCAGGGCATGTGAGCTTTTT
Seq2570	TC	26	X	123058745	123058796	CTACACGACGCTCTTCCGATCTAATCTTTTGGCCCAGTCCTCTTC	CAGACGTGTGCTCTTCCGATCTAGAAGAGCCAACGAATGGTTTGT
Seq2996	TG	25	X	49016321	49016370	CTACACGACGCTCTTCCGATCTCCCCTCCCACCTCTGTCTATATG	CAGACGTGTGCTCTTCCGATCTTGGGACACTCATGCCTGTAAGTA
Seq431	GA	32	X	158359899	158359962	CTACACGACGCTCTTCCGATCTCCAGAATCAGCACCCATCAGAAA	CAGACGTGTGCTCTTCCGATCTTTCCCACCTCTAGTCAAGGTAGA
Seq654	AG	30	X	41454994	41455053	CTACACGACGCTCTTCCGATCTGATTGATCCTGTCTGATCCTGCC	CAGACGTGTGCTCTTCCGATCTAGGTACCAATTCTCCTCCACTCT
Seq970	TG	29	X	84295729	84295786	CTACACGACGCTCTTCCGATCTAATCATAGCCAGCCTGTCATTCC	CAGACGTGTGCTCTTCCGATCTAAACTGCAGATCAATGTGACTTAC
Seq978	GT	29	X	88487737	88487794	CTACACGACGCTCTTCCGATCTTTGCAAGAGTCAGTTGCTCCATT	CAGACGTGTGCTCTTCCGATCTCCACAGAGCATCTTCTGAGGTAAC
Seq1756	CT	27	X	79225360	79225413	CTACACGACGCTCTTCCGATCTTTGTATACCAGCCCTCATGCTCA	CAGACGTGTGCTCTTCCGATCTACCAACCCAACCTCCTGTTCTTA
Seq2034	TC	27	X	160546883	160546936	CTACACGACGCTCTTCCGATCTTGAGGTTCCTTTCATTACTATTTTCCT	CAGACGTGTGCTCTTCCGATCTGCCCACATATAGGGGAGAGGAG
Seq2765	AC	26	X	162808865	162808916	CTACACGACGCTCTTCCGATCTAGCAAGCATCCATCCTGTTCTTC	CAGACGTGTGCTCTTCCGATCTCCTTGCTCTTGATCTGTCCCATC
Seq793	GA	30	X	134218256	134218315	CTACACGACGCTCTTCCGATCTAGGAAGGAAATTAGAAAAGTGTGTG	CAGACGTGTGCTCTTCCGATCTATTATGCCCTATTACACACCCAA
Seq842	TG	29	X	6937241	6937298	CTACACGACGCTCTTCCGATCTTGGTTGTGGAGAAATCAATACTGC	CAGACGTGTGCTCTTCCGATCTTCTCACAACATCTTCTGCTCTCC
Seq908	AG	29	X	49953082	49953139	CTACACGACGCTCTTCCGATCTTCAAGCAAAGTGCAAAGGAATGT	CAGACGTGTGCTCTTCCGATCTAATTTCCGTCTTTCTCCTGTCCC
Seq104	TC	35	X	70625546	70625615	CTACACGACGCTCTTCCGATCTGCTGGGTCTGTCTGTCTTTCTTT	CAGACGTGTGCTCTTCCGATCTTGCTAGAGCAAGCTAACAACACG
Seq213	GA	33	X	48848211	48848276	CTACACGACGCTCTTCCGATCTCACACCATTTAGCTGTTAGCCCT	CAGACGTGTGCTCTTCCGATCTAGATTCCTACCCCAGTTCCAGAC
Seq22292	TTC	36	X	64331999	64332106	CTACACGACGCTCTTCCGATCTGTGTTCATGACAATTTCTGGAACCTT	CAGACGTGTGCTCTTCCGATCTTCCTCCATGGTGTTTCTTTCTCA
Seq22349	TCT	31	X	123582426	123582518	CTACACGACGCTCTTCCGATCTATGTCCAGGACTGATTGACTATT	CAGACGTGTGCTCTTCCGATCTTGAAGTTCACCAACTTGATTCCT
Seq22475	TTC	28	X	163388694	163388777	CTACACGACGCTCTTCCGATCTCCCAAATGACTCAATGTCAGTGGA	CAGACGTGTGCTCTTCCGATCTACATGATAACGCGTCTCAAGCTA
Seq340	GA	32	X	90806479	90806542	CTACACGACGCTCTTCCGATCTCAGCAAGCCTGGCATATAGACAT	CAGACGTGTGCTCTTCCGATCTAATTCACTTGTCAGTCCTGCCTC
Seq593	CT	31	X	156438662	156438723	CTACACGACGCTCTTCCGATCTTATGCCCACTTCCTTTTGGTCAC	CAGACGTGTGCTCTTCCGATCTAAGTGTTGATCTCTGGCTTCCAC
Seq107	CT	35	X	83850247	83850316	CTACACGACGCTCTTCCGATCTGCTTCACCATCTGCCTAATCCTC	CAGACGTGTGCTCTTCCGATCTAACTTCTATGCCCATGCCCTAGT
Seq167	TC	34	X	128825083	128825150	CTACACGACGCTCTTCCGATCTATCCTCTGGCTATGTGGGTCTTT	CAGACGTGTGCTCTTCCGATCTACAGTAACACCAGACAAGAATAAACCT
Seq210	TC	33	X	46419896	46419961	CTACACGACGCTCTTCCGATCTGCAAACACCAGGCACAAATGAAA	CAGACGTGTGCTCTTCCGATCTAAAACAGGCAGGTGGTAAGACAG
Seq398	CA	32	X	139123415	139123478	CTACACGACGCTCTTCCGATCTTTCCCGATTGTAGGCTTACTGGA	CAGACGTGTGCTCTTCCGATCTCAAACCCCGTGAAGACTGAGAAG
Seq558	GA	31	X	126020046	126020107	CTACACGACGCTCTTCCGATCTAGGTGACCATTTCTCTGCTTGTT	CAGACGTGTGCTCTTCCGATCTTGTTCTAAAGATCGACTGCACACA
Seq587	GA	31	X	150319415	150319476	CTACACGACGCTCTTCCGATCTTGCCCAAGTCTCAGACAGTAAAG	CAGACGTGTGCTCTTCCGATCTACCTGCAACCCTTAAAACTGTCC
Seq829	CT	30	X	162491289	162491348	CTACACGACGCTCTTCCGATCTCTTGAGAGGCCTACCCTCACTAT	CAGACGTGTGCTCTTCCGATCTATAGCTTTCACACCAGAGCCAAG
Seq1233	GA	28	X	37622947	37623002	CTACACGACGCTCTTCCGATCTCCTGAGAGACCAGCAACATGGAT	CAGACGTGTGCTCTTCCGATCTTTCCTTCCCTCCCTTCCCTATTC
Seq1292	AG	28	X	67063438	67063493	CTACACGACGCTCTTCCGATCTCAGGTGTCAGTAGAATTGGAGGC	CAGACGTGTGCTCTTCCGATCTCTGCTGGGGTCCAACTCATTTTA
Seq1322	GA	28	X	81182943	81182998	CTACACGACGCTCTTCCGATCTCAGGCATGATCCGTTTTGTAGTT	CAGACGTGTGCTCTTCCGATCTTGGGCATGTGGTAAGTGGAAAAT
Seq1354	AG	28	X	92745701	92745756	CTACACGACGCTCTTCCGATCTAGGTCCAACTCTCAGAACAGTACA	CAGACGTGTGCTCTTCCGATCTCTTCCTCTGCTCAGGAACTCAAC
Seq1525	TC	28	X	157041108	157041163	CTACACGACGCTCTTCCGATCTCCAGGGTTGTCTTTTGTCCTTCA	CAGACGTGTGCTCTTCCGATCTCCCCCACCCCGTATATATGATGA
Seq1592	TC	27	X	17732147	17732200	CTACACGACGCTCTTCCGATCTATTTGCCATGGTAATGCTTCTGC	CAGACGTGTGCTCTTCCGATCTAATGCCAGCCCATATCCTTGTTT
Seq1596	CT	27	X	18596814	18596867	CTACACGACGCTCTTCCGATCTCCCCAGCACTCATGTAAGCTAAG	CAGACGTGTGCTCTTCCGATCTACTCCAGCTATACACCTGTCTCC
Seq1604	AG	27	X	22775318	22775371	CTACACGACGCTCTTCCGATCTAGTTGAGAGCACAGAGACAGAGA	CAGACGTGTGCTCTTCCGATCTTTCTCTTACCATTCACCTCCCCC
Seq1668	CT	27	X	47393066	47393119	CTACACGACGCTCTTCCGATCTTCCACACTGCTCCTGTACTCTTT	CAGACGTGTGCTCTTCCGATCTAGGCCATGTGGATCTATGTGAGA
Seq1775	TC	27	X	84737084	84737137	CTACACGACGCTCTTCCGATCTCCTCCTCCTGAAACACTCCTTTG	CAGACGTGTGCTCTTCCGATCTTCCAGGCCACTATGGGAATTAAGA
Seq1824	GA	27	X	102575241	102575294	CTACACGACGCTCTTCCGATCTACAAGATCAGGGACACTTTGTGA	CAGACGTGTGCTCTTCCGATCTATATACTGCAGCCTGCTTCCAAC
Seq1825	TC	27	X	102926635	102926688	CTACACGACGCTCTTCCGATCTGGGTAAGTTATCCCACCCGAGTA	CAGACGTGTGCTCTTCCGATCTGGGTGCTTAACCTACTGACCTTG
Seq1835	CT	27	X	107685857	107685910	CTACACGACGCTCTTCCGATCTTGGAAAAGGTGTGTTTCTGGGAG	CAGACGTGTGCTCTTCCGATCTAGTTCTCCCTGAGAAAGAGTCCC
Seq1928	GA	27	X	133793241	133793294	CTACACGACGCTCTTCCGATCTGGATCACTAGGGTTCACTGTCCA	CAGACGTGTGCTCTTCCGATCTACATGGTGGAATAGATCAAATGGCA
Seq2050	AG	27	X	164202644	164202697	CTACACGACGCTCTTCCGATCTCCCTTCTGGTCTCACTAAGAAACA	CAGACGTGTGCTCTTCCGATCTTTGCTTTGTGTGAATGTTCTGCC
Seq2073	CT	26	X	7183407	7183458	CTACACGACGCTCTTCCGATCTGAACAGCCTCTTTTGTCTCTACT	CAGACGTGTGCTCTTCCGATCTAGGATAGCACAACGAGAGGAGAA
Seq2098	CT	26	X	12012699	12012750	CTACACGACGCTCTTCCGATCTGGAGCAGGCAATCTTTGTCAAGT	CAGACGTGTGCTCTTCCGATCTCCAATTGGAAAGCTGTCCCCAAA
Seq2181	GA	26	X	34254319	34254370	CTACACGACGCTCTTCCGATCTTGTGTGAACTCCAGCTCTGAAAG	CAGACGTGTGCTCTTCCGATCTTTATGATTGTGTCTGTCTCCTGC
Seq2217	AG	26	X	41511483	41511534	CTACACGACGCTCTTCCGATCTCCCCATGTATCCTGTCCATTCAC	CAGACGTGTGCTCTTCCGATCTCACCCCTTGCTACAGCAACATAG
Seq2357	CT	26	X	72538004	72538055	CTACACGACGCTCTTCCGATCTGGCTGTCCTGTAACCTTGAACTC	CAGACGTGTGCTCTTCCGATCTTCCAGGCATGGTAGTTTACACCT
Seq2446	GA	26	X	95095214	95095265	CTACACGACGCTCTTCCGATCTTGTCATAGGAAAATGTCAGGCCC	CAGACGTGTGCTCTTCCGATCTACCTATTCTTGTCATCGTTTATGGT
Seq25796	CTTT	21	X	103831608	103831691	CTACACGACGCTCTTCCGATCTTTGGATATGTGGCTATTGTGATGT	CAGACGTGTGCTCTTCCGATCTCCTCTTCCCGGATGACCTTATCT
Seq2591	GA	26	X	128764236	128764287	CTACACGACGCTCTTCCGATCTATGTAGCATGGCAACAAACATGC	CAGACGTGTGCTCTTCCGATCTGAAGACTAGGATGTGTGCCCTTG
Seq2711	AG	26	X	152863992	152864043	CTACACGACGCTCTTCCGATCTTTCCTTTGCTTTTCTCTGCTCAA	CAGACGTGTGCTCTTCCGATCTTCTGAATCTCTGTCTTCCTGTGTT
Seq2759	TC	26	X	162378962	162379013	CTACACGACGCTCTTCCGATCTGTGGAGTAAAACAGGAACCCAAA	CAGACGTGTGCTCTTCCGATCTAAAGTCCAAGGGCAAGACACTTT
Seq2838	GA	25	X	14800623	14800672	CTACACGACGCTCTTCCGATCTGGTGAGACCTCTGTGTTTTGTGT	CAGACGTGTGCTCTTCCGATCTTTGGTGACTCTCTATGTGCTCAA
Seq2871	TC	25	X	20038473	20038522	CTACACGACGCTCTTCCGATCTCTGCCCGGCCATTAGTTTGTTTA	CAGACGTGTGCTCTTCCGATCTAGCTGAATTTGTGTTCTGCCTGA
Seq2938	AG	25	X	36256395	36256444	CTACACGACGCTCTTCCGATCTCCCATGTTCCATCCTTAGACACA	CAGACGTGTGCTCTTCCGATCTAAGATCTTTGAGACAGCTTAATAAACA
Seq2980	GA	25	X	45202318	45202367	CTACACGACGCTCTTCCGATCTACAACCACCCCTTCTTCAAGTTC	CAGACGTGTGCTCTTCCGATCTTTCAATTCACAGCATCCATGCCA
Seq2982	GA	25	X	46731228	46731277	CTACACGACGCTCTTCCGATCTCTTGTGTACATTTCACCCCCTCC	CAGACGTGTGCTCTTCCGATCTCTCAGTTACGTTTCTCTGCCTCC
Seq3110	GA	25	X	70005483	70005532	CTACACGACGCTCTTCCGATCTTTTGGCCTTCACGTACAACAAGA	CAGACGTGTGCTCTTCCGATCTGTTAAGCCTTGCCTACTACCACA
Seq3134	AG	25	X	74612967	74613016	CTACACGACGCTCTTCCGATCTGACAGAAGGATTTCTGAGCTGGA	CAGACGTGTGCTCTTCCGATCTGGCTTTGCTGAACATATAGTGGC
Seq3157	AG	25	X	78345959	78346008	CTACACGACGCTCTTCCGATCTTACATGTCAGGAATTTAGGAAGCG	CAGACGTGTGCTCTTCCGATCTGGTCACCGTCTTACCCATGAAAT
Seq3184	AG	25	X	84440875	84440924	CTACACGACGCTCTTCCGATCTTTTTTCATGTGTCAGCCCTCCAT	CAGACGTGTGCTCTTCCGATCTCCATGGTCTGAAATCCCTGAACC
Seq3276	CT	25	X	102533525	102533574	CTACACGACGCTCTTCCGATCTATCACCATAGTGTCATGCCTAGC	CAGACGTGTGCTCTTCCGATCTACGATGAGGAACATTCACACACA
Seq3293	TC	25	X	105716659	105716708	CTACACGACGCTCTTCCGATCTCCTCTCTTTTCTCCTCTCACTCCT	CAGACGTGTGCTCTTCCGATCTAAAGGGAGAGAGAGACTGGCAAT
Seq3413	CT	25	X	127813607	127813656	CTACACGACGCTCTTCCGATCTAATTGCTGATCCATCCAGGACAC	CAGACGTGTGCTCTTCCGATCTTTTCCACTCCAGACCTTTCACAC
Seq3446	GT	25	X	132520672	132520721	CTACACGACGCTCTTCCGATCTTATGCTTCTATGCCCCCAATCCA	CAGACGTGTGCTCTTCCGATCTTCCAACTTTTATGGTGCATGTTTGT
Seq3455	CA	25	X	134203894	134203943	CTACACGACGCTCTTCCGATCTTATGGCTGAGATGGCTGAGTACA	CAGACGTGTGCTCTTCCGATCTTGTACCAGGAAAAGAAAGTGGACA
Seq3469	GT	25	X	136198402	136198451	CTACACGACGCTCTTCCGATCTTCTGCAGGAAACTGAGGAACCTA	CAGACGTGTGCTCTTCCGATCTGCGAAGACTTTAAAATAGGGCACC
Seq3476	AC	25	X	137167279	137167328	CTACACGACGCTCTTCCGATCTGTTGGATCAATGAGAGGGCACAT	CAGACGTGTGCTCTTCCGATCTACTATAAGGCCTCAAAGGGGTGA
Seq3514	TG	25	X	143510038	143510087	CTACACGACGCTCTTCCGATCTTGGGGAAAGTGGCAAAACCCTTT	CAGACGTGTGCTCTTCCGATCTCCTCCATCCTCCTCATTTCCCAT
Seq3516	AC	25	X	143872064	143872113	CTACACGACGCTCTTCCGATCTTCTGTCTTTCCATACTGGTCTCTCT	CAGACGTGTGCTCTTCCGATCTCACCCCACTGAAGCTCTTTTTCT
Seq3581	AG	25	X	155154699	155154748	CTACACGACGCTCTTCCGATCTTCATAATGTGAGTGTGCCTTGCT	CAGACGTGTGCTCTTCCGATCTAGTCTTTGACAAAACCCTGCCTT
Seq3588	CT	25	X	156604239	156604288	CTACACGACGCTCTTCCGATCTGATCCTCATTGCCTCTTCTCTGC	CAGACGTGTGCTCTTCCGATCTTCTGACGTGCTCTTCATGTTCTC
Seq3596	AG	25	X	158451320	158451369	CTACACGACGCTCTTCCGATCTTTAAGAACCACTGTGCTAAGGCA	CAGACGTGTGCTCTTCCGATCTTACCTACTGAAGGACGTAAGGGC
Seq3621	TG	25	X	161890279	161890328	CTACACGACGCTCTTCCGATCTTGAACTATACATGGTCTTTCCCACA	CAGACGTGTGCTCTTCCGATCTCAGAGTAGCAACAATCCCACCAC
Seq3632	TG	25	X	163373939	163373988	CTACACGACGCTCTTCCGATCTTGAATTCAGCATAAAATCAAGGCA	CAGACGTGTGCTCTTCCGATCTCTTCCCCTCATTCATGCTCCC
Seq885	TC	29	X	38493050	38493107	CTACACGACGCTCTTCCGATCTTGGTATCTGTAGAGCAGCAGTCA	CAGACGTGTGCTCTTCCGATCTCAGAGCAGATGATGCAAGCAAAG
Seq990	AG	29	X	92426881	92426938	CTACACGACGCTCTTCCGATCTCATAGTGGCAGGTTTTGGGAAGT	CAGACGTGTGCTCTTCCGATCTATTCAAAGCCCCATCATAGTGCC

## Sheet: S2
Target name	Target enrichment ID	Basic Unit size	Expected Number of repeats	Basic Unit Type	Chromosome	Length MS	Primer sequence - Fw	Primer sequence - Rev	Target location on Chromosome - start	Target location on Chromosome - end	Fw primer location on Chromosome - start	Fw primer location on Chromosome - end	Rev primer location on Chromosome - start	Rev primer location on Chromosome - end	Amplicon location on Chromosome - start	Amplicon location on Chromosome - end	Mpx groups names	Mpx group size
19_46892620_46892717	29843	2	49	AC	19	98	CTACACGACGCTCTTCCGATCTCACGGGCAAGAGTAAGACTCCAT	CAGACGTGTGCTCTTCCGATCTAAAGAGAACTTGGCAGGATTCGG	46892620	46892717	46892591	46892613	46892740	46892762	46892591	46892762	119_40	40
12_53892693_53892788	29817	2	48	AC	12	96	CTACACGACGCTCTTCCGATCTTGACTAATCTTCAGGTCCAGCCT	CAGACGTGTGCTCTTCCGATCTAAGGGCAAGGACTGATATACCCA	53892693	53892788	53892668	53892690	53892796	53892818	53892668	53892818	119_40	40
13_28157307_28157392	29819	2	43	AC	13	86	CTACACGACGCTCTTCCGATCTTTCGATTTGGGCTTGCTTACTCA	CAGACGTGTGCTCTTCCGATCTCCGGGCAACAGATCGAACTTAAA	28157307	28157392	28157276	28157298	28157420	28157442	28157276	28157442	119_40	40
14_55145152_55145233	29824	2	41	AC	14	82	CTACACGACGCTCTTCCGATCTATGTGTCGTATTTTGGGCAGTCA	CAGACGTGTGCTCTTCCGATCTTATATTCCATACCCCTCCCCACC	55145152	55145233	55145124	55145146	55145241	55145263	55145124	55145263	119_40	40
4_1953171_1953250	29879	2	40	AC	4	80	CTACACGACGCTCTTCCGATCTTGTCTCCATTAACATCCATAATTCACA	CAGACGTGTGCTCTTCCGATCTACCTCACCTTTTCCAACAGGAAC	1953171	1953250	1953111	1953137	1953254	1953276	1953111	1953276	119_40	40
14_66077942_66078019	29825	2	39	AC	14	78	CTACACGACGCTCTTCCGATCTAGTGTCATACACACACACACACG	CAGACGTGTGCTCTTCCGATCTTCGGTTTTATAGGCCAACAAGCA	66077942	66078019	66077895	66077917	66078044	66078066	66077895	66078066	119_40	40
3_140208855_140208930	45590	2	38	AC	3	76	CTACACGACGCTCTTCCGATCTGGAGGATGGCAACAGACAAGAAA	CAGACGTGTGCTCTTCCGATCTGACCCAGAGGATCTGGTTAGAGG	140208855	140208930	140208819	140208841	140209020	140209042	140208819	140209042	144_43	40
16_72916877_72916952	29835	2	38	AC	16	76	CTACACGACGCTCTTCCGATCTCAGATTTTTGGCCTTCACACCAC	CAGACGTGTGCTCTTCCGATCTATATGCTAGTGTGTCCTCCCCAC	72916877	72916952	72916848	72916870	72916961	72916983	72916848	72916983	119_40	40
5_96143891_96143964	29893	2	37	AC	5	74	CTACACGACGCTCTTCCGATCTGAAGTGCACGCCTTTCTGAAC	CAGACGTGTGCTCTTCCGATCTCTCGCAACGCTAAACAGTGAAAA	96143891	96143964	96143862	96143882	96143996	96144018	96143862	96144018	119_40	40
1_40666540_40666611	29796	2	36	AC	1	72	CTACACGACGCTCTTCCGATCTTGGGCCAGTGGTTTATCCTTAGT	CAGACGTGTGCTCTTCCGATCTTGGGGTGTGTGTGTGTAGAGTAG	40666540	40666611	40666499	40666521	40666638	40666660	40666499	40666660	119_40	40
10_116794794_116794865	29801	2	36	AC	10	72	CTACACGACGCTCTTCCGATCTGTTGTCTTTGTCTCTGTCTCCCC	CAGACGTGTGCTCTTCCGATCTAGCTTCCTCAGATTGAGGCTTTT	116794794	116794865	116794757	116794779	116794916	116794938	116794757	116794938	119_40	40
22_24439267_24439338	29863	2	36	AC	22	72	CTACACGACGCTCTTCCGATCTCGGGGTGCATATTCAAGGAGAG	CAGACGTGTGCTCTTCCGATCTCAGAGGTTGACATCTGTGGAGTC	24439267	24439338	24439238	24439259	24439378	24439400	24439238	24439400	119_40	40
X_31205835_31205904	29421	2	35	AG	X	70	CTACACGACGCTCTTCCGATCTGCTGAGAAGGTCATCAGTAAAGCA	CAGACGTGTGCTCTTCCGATCTTAAATCGCCCCTTCAGAAGTCAC	31205835	31205904	31205775	31205798	31205916	31205938	31205775	31205938	96_40	40
20_47363479_47363548	29860	2	35	AC	20	70	CTACACGACGCTCTTCCGATCTGCAGGCATAGAGTTTAGATCCCA	CAGACGTGTGCTCTTCCGATCTGACTTGCTCAAGGTCTCTGCAT	47363479	47363548	47363448	47363470	47363568	47363589	47363448	47363589	119_40	40
3_52079872_52079941	29873	2	35	AC	3	70	CTACACGACGCTCTTCCGATCTGTCTAGTCAGAGGATGGCAAAGC	CAGACGTGTGCTCTTCCGATCTCTGCCCTGAGGCTTTTCACTAGG	52079872	52079941	52079849	52079871	52079965	52079987	52079849	52079987	119_40	40
7_150699472_150699541	29904	2	35	AC	7	70	CTACACGACGCTCTTCCGATCTGACTCAGAATTGGAGTGACTGGG	CAGACGTGTGCTCTTCCGATCTGGGGTCTCTTAGCATCTCCCTTT	150699472	150699541	150699433	150699455	150699552	150699574	150699433	150699574	119_40	40
X_81316131_81316199	28727	3	23	AAG	X	69	CTACACGACGCTCTTCCGATCTATTTACTATGCCATGCTGCTGCT	CAGACGTGTGCTCTTCCGATCTGGCATCTGTTCTTGTTTGCACAT	81316131	81316199	81316094	81316116	81316243	81316265	81316094	81316265	113_40	40
5_39075387_39075454	29889	2	34	AC	5	68	CTACACGACGCTCTTCCGATCTTGCATAAGCCTATTAACATTAGGGA	CAGACGTGTGCTCTTCCGATCTTAGTTCAAGAGAAAGCTGCTGGG	39075387	39075454	39075324	39075348	39075466	39075488	39075324	39075488	106_40	40
6_125080735_125080802	29895	2	34	AC	6	68	CTACACGACGCTCTTCCGATCTCCTAGCCACCCTGTCTGAAATTG	CAGACGTGTGCTCTTCCGATCTTGTGACGGAGGAAAATAAGGCAG	125080735	125080802	125080710	125080732	125080819	125080841	125080710	125080841	106_40	40
1_46612359_46612426	29797	2	34	AC	1	68	CTACACGACGCTCTTCCGATCTTCCCTTGGGAAGCCTTGAGTATT	CAGACGTGTGCTCTTCCGATCTGGCAGATCATTACTACCCCAACC	46612359	46612426	46612306	46612328	46612472	46612494	46612306	46612494	119_40	40
5_65361420_65361487	29892	2	34	AC	5	68	CTACACGACGCTCTTCCGATCTACTGTACATTCCGAGTGATTTCAGA	CAGACGTGTGCTCTTCCGATCTTCTGCGCCTGAATTTCCTTACTG	65361420	65361487	65361373	65361397	65361537	65361559	65361373	65361559	119_40	40
X_132795597_132795662	29422	2	33	AG	X	66	CTACACGACGCTCTTCCGATCTGTTTGAACAGTGGAAGCTGGCTA	CAGACGTGTGCTCTTCCGATCTAATAACCGAGAGAGAGGAGGAGG	132795597	132795662	132795564	132795586	132795696	132795718	132795564	132795718	96_40	40
1_21270468_21270533	29794	2	33	AC	1	66	CTACACGACGCTCTTCCGATCTTGCCAAATCCCTCAGACTAAGTT	CAGACGTGTGCTCTTCCGATCTATTTGTTATATATGGTGTGTTCCATCT	21270468	21270533	21270395	21270417	21270546	21270572	21270395	21270572	106_40	40
1_230966339_230966404	29795	2	33	AC	1	66	CTACACGACGCTCTTCCGATCTTTTGTGGAATTCTCTGGTGTGGG	CAGACGTGTGCTCTTCCGATCTTCAATGAACCTGAGGTAGGGTAA	230966339	230966404	230966316	230966338	230966406	230966428	230966316	230966428	106_40	40
11_72008681_72008746	29813	2	33	AC	11	66	CTACACGACGCTCTTCCGATCTCTTACCCCACTGCTTATGGGTTC	CAGACGTGTGCTCTTCCGATCTTGAGCTCTGCAAAGTGAGTATGG	72008681	72008746	72008613	72008635	72008785	72008807	72008613	72008807	106_40	40
12_54546548_54546613	29818	2	33	AC	12	66	CTACACGACGCTCTTCCGATCTTTCAGAGAAGAGGCTGGGATAGC	CAGACGTGTGCTCTTCCGATCTCAGCCTGCAAAACCTTTCAGTG	54546548	54546613	54546501	54546523	54546616	54546637	54546501	54546637	106_40	40
16_56311689_56311754	29833	2	33	AC	16	66	CTACACGACGCTCTTCCGATCTTGGGGAGCGTGATATCTGAATCT	CAGACGTGTGCTCTTCCGATCTATTTTTAGGAAGAGCTGGCTGGG	56311689	56311754	56311627	56311649	56311792	56311814	56311627	56311814	106_40	40
16_67209958_67210023	29834	2	33	AC	16	66	CTACACGACGCTCTTCCGATCTGCTTGACTCTCAAGGCCTGAAT	CAGACGTGTGCTCTTCCGATCTGTTGGACAGGACACTCCTTCTTG	67209958	67210023	67209934	67209955	67210057	67210079	67209934	67210079	106_40	40
16_81211002_81211067	29836	2	33	AC	16	66	CTACACGACGCTCTTCCGATCTTTCCTGAATAGCTCCAGGCTTCT	CAGACGTGTGCTCTTCCGATCTCCCAAAAGTATGACCATGTGGGG	81211002	81211067	81210959	81210981	81211105	81211127	81210959	81211127	106_40	40
2_175672175_175672240	29848	2	33	AC	2	66	CTACACGACGCTCTTCCGATCTGGGATCAGAGCATACTGTGGACT	CAGACGTGTGCTCTTCCGATCTCTTGTCTCATGGGGCAGACATTT	175672175	175672240	175672130	175672152	175672282	175672304	175672130	175672304	106_40	40
2_216734515_216734580	29853	2	33	AC	2	66	CTACACGACGCTCTTCCGATCTATTAGAAGCCCACACCCTGAGAA	CAGACGTGTGCTCTTCCGATCTTACGCTGCTTCTACCAAGTGATG	216734515	216734580	216734492	216734514	216734622	216734644	216734492	216734644	106_40	40
3_123043252_123043317	29865	2	33	AC	3	66	CTACACGACGCTCTTCCGATCTTCACTAAGTGGCCACACAGAAAC	CAGACGTGTGCTCTTCCGATCTGGAGTCACCCATACCAAGGAAGG	123043252	123043317	123043229	123043251	123043339	123043361	123043229	123043361	106_40	40
3_45636271_45636336	29871	2	33	AC	3	66	CTACACGACGCTCTTCCGATCTGGCAGGTGGAAGTCTTTACTTGT	CAGACGTGTGCTCTTCCGATCTAGGCCCAGGTCGTCATACTTATC	45636271	45636336	45636195	45636217	45636375	45636397	45636195	45636397	106_40	40
3_62077738_62077803	29875	2	33	AC	3	66	CTACACGACGCTCTTCCGATCTAGCTGCTGTTCACAGAACTGAAT	CAGACGTGTGCTCTTCCGATCTCCGGTCCTTGTCTTAAGGAGTTT	62077738	62077803	62077671	62077693	62077811	62077833	62077671	62077833	106_40	40
5_173773021_173773086	29887	2	33	AC	5	66	CTACACGACGCTCTTCCGATCTCTGACTCACCTGTGCTCCAATAG	CAGACGTGTGCTCTTCCGATCTGCTTAAAGCTTCTGCTGGCCT	173773021	173773086	173772975	173772997	173773092	173773112	173772975	173773112	106_40	40
5_60651259_60651324	29890	2	33	AC	5	66	CTACACGACGCTCTTCCGATCTAGCTTACCTGTTTACAGTGCGAA	CAGACGTGTGCTCTTCCGATCTTTAACATTCTGGCTCCTGCCATC	60651259	60651324	60651217	60651239	60651330	60651352	60651217	60651352	106_40	40
6_45180219_45180284	29899	2	33	AC	6	66	CTACACGACGCTCTTCCGATCTGTTCTGAAACTTCCCTCCACCTC	CAGACGTGTGCTCTTCCGATCTAGGACCTAGTGAGTAGTAGAGTCA	45180219	45180284	45180191	45180213	45180288	45180311	45180191	45180311	106_40	40
7_6532777_6532842	29908	2	33	AC	7	66	CTACACGACGCTCTTCCGATCTGGTTTTATGTTGAAACCCCCAGC	CAGACGTGTGCTCTTCCGATCTAAATCCAAAAGCCCCATCCTCTG	6532777	6532842	6532728	6532750	6532861	6532883	6532728	6532883	106_40	40
X_44068266_44068331	28856	2	33	AC	X	66	CTACACGACGCTCTTCCGATCTGGGAAAGGACAGACAATGCATGA	CAGACGTGTGCTCTTCCGATCTCATTTGCCTTCCACATTTGGGTC	44068266	44068331	44068223	44068245	44068370	44068392	44068223	44068392	117_40	40
5_122424822_122424885	63438	2	32	AC	5	64	CTACACGACGCTCTTCCGATCTAGAACTTCCTTCTTCCCTCTCCC	CAGACGTGTGCTCTTCCGATCTGTGGGTTTTACGACAGCACAAAA	122424822	122424885	122424712	122424734	122424895	122424917	122424712	122424917	140_43	43
X_14154788_14154851	29423	2	32	AG	X	64	CTACACGACGCTCTTCCGATCTCTTGCTGCATCCACATCTACTCA	CAGACGTGTGCTCTTCCGATCTGAGGCTCTGACCACTCTTGGATA	14154788	14154851	14154724	14154746	14154865	14154887	14154724	14154887	96_40	40
X_118134739_118134802	29424	2	32	AG	X	64	CTACACGACGCTCTTCCGATCTGCTTGGTGTTAAGGATCTTGTCAG	CAGACGTGTGCTCTTCCGATCTGAGGGAGGAAGAGAGAGTGACAG	118134739	118134802	118134704	118134727	118134804	118134826	118134704	118134826	96_40	40
X_104031600_104031663	29425	2	32	AG	X	64	CTACACGACGCTCTTCCGATCTTTATGTACCCTATGTTGCCTCGC	CAGACGTGTGCTCTTCCGATCTAGGAAGGAGAAGGACCTATCCAAC	104031600	104031663	104031532	104031554	104031674	104031697	104031532	104031697	97_40	40
11_43455719_43455782	29810	2	32	AC	11	64	CTACACGACGCTCTTCCGATCTTTGCTCATGGCTTCTTTCCCATT	CAGACGTGTGCTCTTCCGATCTAAGACTGAATGTGGTGTGTGTGT	43455719	43455782	43455678	43455700	43455824	43455846	43455678	43455846	106_40	40
13_48890856_48890919	29820	2	32	AC	13	64	CTACACGACGCTCTTCCGATCTGTTGGTGTACGTCTATACAGGGC	CAGACGTGTGCTCTTCCGATCTTTGTGGAAAGGAGCGTATCTGTG	48890856	48890919	48890786	48890808	48890930	48890952	48890786	48890952	106_40	40
16_4533162_4533225	29830	2	32	AC	16	64	CTACACGACGCTCTTCCGATCTTCCTGAAGCTAATGCAAACCCTG	CAGACGTGTGCTCTTCCGATCTGATCACCAGTGGCCAATAACGTA	4533162	4533225	4533139	4533161	4533259	4533281	4533139	4533281	106_40	40
2_160181137_160181200	29847	2	32	AC	2	64	CTACACGACGCTCTTCCGATCTGCAGGTTTATTACACGGGTTTTT	CAGACGTGTGCTCTTCCGATCTTAACAGCAAGATATAGGCCCTGC	160181137	160181200	160181057	160181079	160181212	160181234	160181057	160181234	106_40	40
21_43497112_43497175	29862	2	32	AC	21	64	CTACACGACGCTCTTCCGATCTTGACACACAGGTGATCTCTTCCA	CAGACGTGTGCTCTTCCGATCTCAAGGCAGGACCTTCTGACTGTA	43497112	43497175	43497081	43497103	43497223	43497245	43497081	43497245	106_40	40
3_50593987_50594050	29872	2	32	AC	3	64	CTACACGACGCTCTTCCGATCTTGCTACTCCCAAGGAAGGGTTTT	CAGACGTGTGCTCTTCCGATCTTGCCTCACTACTCCTGGAATTGA	50593987	50594050	50593954	50593976	50594092	50594114	50593954	50594114	106_40	40
3_59994892_59994955	29874	2	32	AC	3	64	CTACACGACGCTCTTCCGATCTAAAGGACAGCTTTGGAACCTTCA	CAGACGTGTGCTCTTCCGATCTTGGGGATATCTTGACTCGTTTGT	59994892	59994955	59994851	59994873	59994987	59995009	59994851	59995009	106_40	40
6_121634252_121634315	29894	2	32	AC	6	64	CTACACGACGCTCTTCCGATCTCACTGGGAATACAGGCACACAAT	CAGACGTGTGCTCTTCCGATCTCTGGGCAACATAGAGACAAGGTC	121634252	121634315	121634210	121634232	121634319	121634341	121634210	121634341	106_40	40
6_37632619_37632682	29898	2	32	AC	6	64	CTACACGACGCTCTTCCGATCTCCAGCAAATCACTTGGCTAAACC	CAGACGTGTGCTCTTCCGATCTCACAGGCTCAGAGAGCAATGAAA	37632619	37632682	37632541	37632563	37632720	37632742	37632541	37632742	106_40	40
7_136688221_136688284	29903	2	32	AC	7	64	CTACACGACGCTCTTCCGATCTACCCTTTCCTCCTCAACTAACAT	CAGACGTGTGCTCTTCCGATCTCCCAGAATACCCCAAGATGGAAG	136688221	136688284	136688169	136688191	136688338	136688360	136688169	136688360	106_40	40
7_31341810_31341873	29906	2	32	AC	7	64	CTACACGACGCTCTTCCGATCTCATTATACTTCAGCCTGCGTTGC	CAGACGTGTGCTCTTCCGATCTAGAAGGGTATTCTGATCTGGTCC	31341810	31341873	31341772	31341794	31341874	31341896	31341772	31341896	106_40	40
8_100833332_100833395	29911	2	32	AC	8	64	CTACACGACGCTCTTCCGATCTTGGGAGCCAAAATAGAATGTACG	CAGACGTGTGCTCTTCCGATCTACTAAGGTAACCAAATATCCCTCCA	100833332	100833395	100833296	100833318	100833398	100833422	100833296	100833422	106_40	40
8_21029007_21029070	29917	2	32	AC	8	64	CTACACGACGCTCTTCCGATCTTCAAACTCAGATCAAAGCTCCCC	CAGACGTGTGCTCTTCCGATCTGCAACACAATCCTCTTCATCCCT	21029007	21029070	21028963	21028985	21029072	21029094	21028963	21029094	106_40	40
9_134131645_134131708	29926	2	32	AC	9	64	CTACACGACGCTCTTCCGATCTGAAACCCTGCTATCAGGTTAGGC	CAGACGTGTGCTCTTCCGATCTGAGCTCTGCCCATGAGAGACTAT	134131645	134131708	134131604	134131626	134131710	134131732	134131604	134131732	106_40	40
9_85583222_85583285	29927	2	32	AC	9	64	CTACACGACGCTCTTCCGATCTTCATCTGTTTGGTCCTCTCCTCC	CAGACGTGTGCTCTTCCGATCTTGGGAGAGGATCAATTTCTGTTGC	85583222	85583285	85583194	85583216	85583291	85583314	85583194	85583314	106_40	40
X_62296620_62296683	28857	2	32	AC	X	64	CTACACGACGCTCTTCCGATCTACACAACATAATGCAGTTTTTAGTCA	CAGACGTGTGCTCTTCCGATCTGGGGTTTCTCTCAGGTCTAAAGC	62296620	62296683	62296542	62296567	62296700	62296722	62296542	62296722	118_40	40
X_19652150_19652213	28858	2	32	AC	X	64	CTACACGACGCTCTTCCGATCTATTTTGTTCCCTGGTGTGTGTGT	CAGACGTGTGCTCTTCCGATCTCCAAACACTGTACTGACGTCCAA	19652150	19652213	19652137	19652159	19652388	19652410	19652137	19652410	118_40	40
X_109941043_109941106	28859	2	32	AC	X	64	CTACACGACGCTCTTCCGATCTTGGCTTTCTAGTCTGCACCTACT	CAGACGTGTGCTCTTCCGATCTTTCTCATGAATTGGTCCTCGTGC	109941043	109941106	109940993	109941015	109941130	109941152	109940993	109941152	118_40	40
X_18644782_18644843	29426	2	31	AG	X	62	CTACACGACGCTCTTCCGATCTAACCATTTCTTTTACCAAGAAGCC	CAGACGTGTGCTCTTCCGATCTTGATTGAGTAAGACCCTGCCAGA	18644782	18644843	18644758	18644781	18644886	18644908	18644758	18644908	97_40	40
X_19447879_19447940	29427	2	31	AG	X	62	CTACACGACGCTCTTCCGATCTTGGCTGGGATTGTCAGAGAAGTA	CAGACGTGTGCTCTTCCGATCTAGGCCCACATCATTCATTTCCAT	19447879	19447940	19447802	19447824	19447993	19448015	19447802	19448015	97_40	40
10_65849325_65849386	29805	2	31	AC	10	62	CTACACGACGCTCTTCCGATCTATGATGCACTTGTAGCACATGGT	CAGACGTGTGCTCTTCCGATCTCAACTTCTCCACTCAACCCTCAG	65849325	65849386	65849265	65849287	65849432	65849454	65849265	65849454	106_40	40
10_8738401_8738462	29806	2	31	AC	10	62	CTACACGACGCTCTTCCGATCTTTGACTGGTGCAGTAATGGTCAG	CAGACGTGTGCTCTTCCGATCTTGGTCTCTCTCTCTCTTCTCTGTT	8738401	8738462	8738324	8738346	8738482	8738505	8738324	8738505	106_40	40
11_47828343_47828404	29811	2	31	AC	11	62	CTACACGACGCTCTTCCGATCTTGGAGCATCAAAACAGAATGGGA	CAGACGTGTGCTCTTCCGATCTGCATGGGGTCTGTGAAACTGTAG	47828343	47828404	47828310	47828332	47828444	47828466	47828310	47828466	106_40	40
16_51872847_51872908	29832	2	31	AC	16	62	CTACACGACGCTCTTCCGATCTACTTTTGCTGGAGCTCTTGACAG	CAGACGTGTGCTCTTCCGATCTAGTGTCCCGTTAAGATAGGTGGC	51872847	51872908	51872810	51872832	51872960	51872982	51872810	51872982	106_40	40
19_1795784_1795845	29842	2	31	AC	19	62	CTACACGACGCTCTTCCGATCTGCCTTCCATTTCTCCGTACAGTC	CAGACGTGTGCTCTTCCGATCTAATGGAATTTGCCACAGAGGAGG	1795784	1795845	1795730	1795752	1795882	1795904	1795730	1795904	106_40	40
19_56330493_56330554	29844	2	31	AC	19	62	CTACACGACGCTCTTCCGATCTTCCCCACTGTACTGAGTGGTATC	CAGACGTGTGCTCTTCCGATCTGCAGAGGTGGGGTAGAATTGAAG	56330493	56330554	56330466	56330488	56330564	56330586	56330466	56330586	106_40	40
13_113709697_113709758	29941	2	31	AC	13	62	CTACACGACGCTCTTCCGATCTCCAGAGGCTTTAGGGGCAAATAG	CAGACGTGTGCTCTTCCGATCTGCTCTTCTACGTTTCACTGTCGT	113709697	113709758	113709639	113709661	113709819	113709841	113709639	113709841	106_40	40
11_119517872_119517933	29809	2	31	AC	11	62	CTACACGACGCTCTTCCGATCTCACACACCCCCAACTGGTCTA	CAGACGTGTGCTCTTCCGATCTGTGACAATCCTCAACCCTTTCCA	119517872	119517933	119517807	119517827	119517948	119517970	119517807	119517970	107_40	40
11_70661281_70661342	29812	2	31	AC	11	62	CTACACGACGCTCTTCCGATCTGCACCTTTAGGAGGATGGGAGAA	CAGACGTGTGCTCTTCCGATCTTGTGCCTCCTCCTTCTCATTTTC	70661281	70661342	70661255	70661277	70661343	70661365	70661255	70661365	107_40	40
12_4105199_4105260	29815	2	31	AC	12	62	CTACACGACGCTCTTCCGATCTGATATTGTTGCCAGTAGAGGGCA	CAGACGTGTGCTCTTCCGATCTGAGTGTGTGCGCATGTTCTTTTA	4105199	4105260	4105139	4105161	4105302	4105324	4105139	4105324	107_40	40
13_58071835_58071896	29821	2	31	AC	13	62	CTACACGACGCTCTTCCGATCTTAAAGGTGAGAATGGCTGCAGAT	CAGACGTGTGCTCTTCCGATCTTGAGTTTCTGGTAGGAATTGGAAGC	58071835	58071896	58071806	58071828	58071899	58071923	58071806	58071923	107_40	40
16_5105940_5106001	29831	2	31	AC	16	62	CTACACGACGCTCTTCCGATCTTACTTGCTTAATCTGGCAACTCC	CAGACGTGTGCTCTTCCGATCTCCGGGACATCTTCATGGAAAACA	5105940	5106001	5105917	5105939	5106054	5106076	5105917	5106076	107_40	40
18_62619347_62619408	29841	2	31	AC	18	62	CTACACGACGCTCTTCCGATCTCCTGCTTAGATTATTTGGAGGTCCC	CAGACGTGTGCTCTTCCGATCTTAATGTCACAGAGCTCCACATGC	62619347	62619408	62619310	62619334	62619425	62619447	62619310	62619447	107_40	40
2_139324943_139325004	29845	2	31	AC	2	62	CTACACGACGCTCTTCCGATCTAAGGAAATGAGATGCGCAAAGTT	CAGACGTGTGCTCTTCCGATCTTCTGCCTACTTTCTCCAGCTTCT	139324943	139325004	139324896	139324918	139325031	139325053	139324896	139325053	107_40	40
2_197227043_197227104	29851	2	31	AC	2	62	CTACACGACGCTCTTCCGATCTAGCTTCCTTCCTTTGCTTTTCCA	CAGACGTGTGCTCTTCCGATCTGGATTGCAGTCAGCTTGTTTGAC	197227043	197227104	197226990	197227012	197227118	197227140	197226990	197227140	107_40	40
2_25075875_25075936	29855	2	31	AC	2	62	CTACACGACGCTCTTCCGATCTTTGAAGGAAAGGAACAGCTGGAG	CAGACGTGTGCTCTTCCGATCTCCTAGTTTGATATGGCTGGAGGC	25075875	25075936	25075851	25075873	25075988	25076010	25075851	25076010	107_40	40
21_33290008_33290069	29861	2	31	AC	21	62	CTACACGACGCTCTTCCGATCTCCTGAAACTCCCATTCCCAAACA	CAGACGTGTGCTCTTCCGATCTCGATTCACTTAAGGATGAGGCCC	33290008	33290069	33289984	33290006	33290110	33290132	33289984	33290132	107_40	40
3_139001999_139002060	29866	2	31	AC	3	62	CTACACGACGCTCTTCCGATCTCCTCCTCCAAGAAGGCTTTTTCA	CAGACGTGTGCTCTTCCGATCTAGCAGATAGTGTCCTGGTAGAGG	139001999	139002060	139001941	139001963	139002067	139002089	139001941	139002089	107_40	40
3_177404953_177405014	29867	2	31	AC	3	62	CTACACGACGCTCTTCCGATCTGGTTTTTACCATATGCATGGCCC	CAGACGTGTGCTCTTCCGATCTTCTCAGTGAAGTGCCCGATTTTT	177404953	177405014	177404903	177404925	177405040	177405062	177404903	177405062	107_40	40
3_36484232_36484293	29868	2	31	AC	3	62	CTACACGACGCTCTTCCGATCTGCAGCAGGAAGAGCAGATAAAGT	CAGACGTGTGCTCTTCCGATCTCTATCCACAGGACACAAACCAGG	36484232	36484293	36484178	36484200	36484341	36484363	36484178	36484363	107_40	40
3_40836338_40836399	29869	2	31	AC	3	62	CTACACGACGCTCTTCCGATCTTGGGTCTGTGTTTCTTGGGTTTT	CAGACGTGTGCTCTTCCGATCTCTGGATCTACATACAGCCTTCCG	40836338	40836399	40836308	40836330	40836437	40836459	40836308	40836459	107_40	40
3_42457491_42457552	29870	2	31	AC	3	62	CTACACGACGCTCTTCCGATCTTAACCAGTGCCTTAGGCTTTTCC	CAGACGTGTGCTCTTCCGATCTAGGGAGAGGAGATTGCTCAAAGT	42457491	42457552	42457423	42457445	42457601	42457623	42457423	42457623	107_40	40
4_107883649_107883710	29877	2	31	AC	4	62	CTACACGACGCTCTTCCGATCTGTCTCTTCAAGAAATGGAGCCAGA	CAGACGTGTGCTCTTCCGATCTTTGTAGATGGTGAGAGATGGGCA	107883649	107883710	107883618	107883641	107883733	107883755	107883618	107883755	107_40	40
4_119731230_119731291	29878	2	31	AC	4	62	CTACACGACGCTCTTCCGATCTTGGGTGGAGAAGAGTGGTAAGAG	CAGACGTGTGCTCTTCCGATCTGCAGGACCCTACATTATTTGCCA	119731230	119731291	119731190	119731212	119731317	119731339	119731190	119731339	107_40	40
4_80435627_80435688	29881	2	31	AC	4	62	CTACACGACGCTCTTCCGATCTCACCTCTTCCCCCTTCTAACAGA	CAGACGTGTGCTCTTCCGATCTTGTCCAGTATGAACAGAACTCAAA	80435627	80435688	80435591	80435613	80435718	80435741	80435591	80435741	107_40	40
5_105951055_105951116	29883	2	31	AC	5	62	CTACACGACGCTCTTCCGATCTAAGATGATGCTGAAGCAGCTGTG	CAGACGTGTGCTCTTCCGATCTTCCAGCATTGGTCATCAAGAACT	105951055	105951116	105951007	105951029	105951144	105951166	105951007	105951166	107_40	40
5_25793978_25794039	29888	2	31	AC	5	62	CTACACGACGCTCTTCCGATCTCGAGAACCTAAACATCCAGAGCC	CAGACGTGTGCTCTTCCGATCTCTACCATGCCTAAGCTGCTTTCA	25793978	25794039	25793919	25793941	25794064	25794086	25793919	25794086	107_40	40
6_162977375_162977436	29896	2	31	AC	6	62	CTACACGACGCTCTTCCGATCTAACAGCTTTGATCAGAGGCAACT	CAGACGTGTGCTCTTCCGATCTTCAACATGATGCACTAGAGGGGA	162977375	162977436	162977312	162977334	162977464	162977486	162977312	162977486	107_40	40
6_73907304_73907365	29901	2	31	AC	6	62	CTACACGACGCTCTTCCGATCTTCAACCTGAAGTTGTGATTCCCC	CAGACGTGTGCTCTTCCGATCTTAATAATGGGAGAGAGCCTGCCC	73907304	73907365	73907263	73907285	73907403	73907425	73907263	73907425	107_40	40
7_92001265_92001326	29910	2	31	AC	7	62	CTACACGACGCTCTTCCGATCTCTAGTCACCTTCCCCAGTGAGAG	CAGACGTGTGCTCTTCCGATCTTCTAAGCCGTACGCTCCAAAAC	92001265	92001326	92001229	92001251	92001376	92001397	92001229	92001397	107_40	40
8_104460076_104460137	29913	2	31	AC	8	62	CTACACGACGCTCTTCCGATCTATGCCCGTGCATACTTAAAGGAA	CAGACGTGTGCTCTTCCGATCTTGGGTGGATGAATTATGGAGGGT	104460076	104460137	104460020	104460042	104460153	104460175	104460020	104460175	107_40	40
8_133180965_133181026	29915	2	31	AC	8	62	CTACACGACGCTCTTCCGATCTTCTGGAGATGGGAGTAGAAAGAGA	CAGACGTGTGCTCTTCCGATCTCCAATGCTACTAGATAGGGGGCT	133180965	133181026	133180923	133180946	133181059	133181081	133180923	133181081	107_40	40
8_143718311_143718372	29916	2	31	AC	8	62	CTACACGACGCTCTTCCGATCTAGAGCCTCAAACCCTTCTCATCA	CAGACGTGTGCTCTTCCGATCTCAGCTGGAGGAATTGTGCTCAG	143718311	143718372	143718236	143718258	143718400	143718421	143718236	143718421	107_40	40
8_74238188_74238249	29921	2	31	AC	8	62	CTACACGACGCTCTTCCGATCTCAGGATTGAGCTACGTAAAGCCA	CAGACGTGTGCTCTTCCGATCTGCTACAGCCTTCTAAGGAAACAGG	74238188	74238249	74238158	74238180	74238257	74238280	74238158	74238280	107_40	40
8_77203116_77203177	29922	2	31	AC	8	62	CTACACGACGCTCTTCCGATCTCTGCCCCTCTTCCAGAAAATTCA	CAGACGTGTGCTCTTCCGATCTGAAACAGAGTAGTAGCAGCAGCA	77203116	77203177	77203047	77203069	77203204	77203226	77203047	77203226	107_40	40
9_107077097_107077158	29924	2	31	AC	9	62	CTACACGACGCTCTTCCGATCTCAGAACAGCCAGACCAGTTATCC	CAGACGTGTGCTCTTCCGATCTTTAACTCTGGGGCAGGAACACTA	107077097	107077158	107077057	107077079	107077212	107077234	107077057	107077234	107_40	40
9_129373338_129373399	29925	2	31	AC	9	62	CTACACGACGCTCTTCCGATCTGACACGAGGAGTGAGGACAAAG	CAGACGTGTGCTCTTCCGATCTCTTCCCCGCTGTCCATTCATT	129373338	129373399	129373290	129373311	129373406	129373426	129373290	129373426	107_40	40
12_11902223_11902284	29937	2	31	AC	12	62	CTACACGACGCTCTTCCGATCTGCAGCGGTTATAATCCTCTTGGG	CAGACGTGTGCTCTTCCGATCTTGAGAGTCCCACCTCTAAAGCAA	11902223	11902284	11902180	11902202	11902345	11902367	11902180	11902367	107_40	40
15_40846105_40846166	29948	2	31	AC	15	62	CTACACGACGCTCTTCCGATCTCTTCAGTGGATTTCTCCCTGCTG	CAGACGTGTGCTCTTCCGATCTCTCCAGAGTCACAGGTTGAGAAG	40846105	40846166	40846031	40846053	40846227	40846249	40846031	40846249	107_40	40
X_47689133_47689194	28860	2	31	AC	X	62	CTACACGACGCTCTTCCGATCTGCTTGAGGACAGGAGTTTGGTAT	CAGACGTGTGCTCTTCCGATCTATTGAAGCAGGGTCAGGGTTTTT	47689133	47689194	47689073	47689095	47689253	47689275	47689073	47689275	118_40	40
X_123576895_123576956	28861	2	31	AC	X	62	CTACACGACGCTCTTCCGATCTTCCACCCAGATTGCTGTAACTTT	CAGACGTGTGCTCTTCCGATCTGTGGGTTCAGCATTTTCTGTTGT	123576895	123576956	123576855	123576877	123576965	123576987	123576855	123576987	118_40	40
2_176241068_176241127	42342	2	30	AC	2	60	CTACACGACGCTCTTCCGATCTGTTGACAGAGAAACATCCCACCA	CAGACGTGTGCTCTTCCGATCTAAGAGGGCAAACCAAACAGGAAA	176241068	176241127	176241007	176241029	176241131	176241153	176241007	176241153	136_43	43
3_35809572_35809631	43182	2	30	AC	3	60	CTACACGACGCTCTTCCGATCTGTCTGAGGCCTGACCCAATAAAC	CAGACGTGTGCTCTTCCGATCTTCTCAAGCCTATCCTCTCCATCC	35809572	35809631	35809502	35809524	35809648	35809670	35809502	35809670	136_43	43
7_67887213_67887272	46508	2	30	AC	7	60	CTACACGACGCTCTTCCGATCTGCTCTCAAGAGGTTGGAGTTCAG	CAGACGTGTGCTCTTCCGATCTTGGAGAGAGCTCACCTATTGCTT	67887213	67887272	67887190	67887212	67887311	67887333	67887190	67887333	136_43	43
7_148326341_148326400	39044	2	30	AC	7	60	CTACACGACGCTCTTCCGATCTTCCCTCACTGGAAGAGGGTTTTA	CAGACGTGTGCTCTTCCGATCTTGGGTATGAGCACTGTGACTTTG	148326341	148326400	148326260	148326282	148326435	148326457	148326260	148326457	137_43	43
8_87865362_87865421	62531	2	30	AC	8	60	CTACACGACGCTCTTCCGATCTAGCAAAAGTACAGATAAGGGTGGAC	CAGACGTGTGCTCTTCCGATCTCAGAAAATGCTGCCTTTCCCAAG	87865362	87865421	87865334	87865358	87865454	87865476	87865334	87865476	137_43	43
22_35354642_35354701	67290	2	30	AC	22	60	CTACACGACGCTCTTCCGATCTAATCTACCCAGACTAGCACCTCC	CAGACGTGTGCTCTTCCGATCTAAGGAAACCTCCAGCTTTGTCTG	35354642	35354701	35354599	35354621	35354731	35354753	35354599	35354753	137_43	43
3_50639486_50639545	67807	2	30	AC	3	60	CTACACGACGCTCTTCCGATCTAAGGAATGTTGGCCAAGTGGAAA	CAGACGTGTGCTCTTCCGATCTCAGCCCCACATCAGTGACATC	50639486	50639545	50639429	50639451	50639549	50639569	50639429	50639569	137_43	43
4_167999460_167999519	64950	2	30	AC	4	60	CTACACGACGCTCTTCCGATCTACCTATGTGTATCCAGGTCATAACT	CAGACGTGTGCTCTTCCGATCTTTCCCAACATTCCAGATCCCTCT	167999460	167999519	167999434	167999458	167999525	167999547	167999434	167999547	138_43	43
12_124688441_124688500	57467	2	30	AC	12	60	CTACACGACGCTCTTCCGATCTCAACCAGAGGTGCGGATACTTAG	CAGACGTGTGCTCTTCCGATCTAGAGACCCATTTCCTCCAATCCA	124688441	124688500	124688375	124688397	124688535	124688557	124688375	124688557	140_43	43
3_151398303_151398362	62385	2	30	AC	3	60	CTACACGACGCTCTTCCGATCTAGCACGAAAGTTTGGGTCAAGAT	CAGACGTGTGCTCTTCCGATCTGCTATGTAATTTTAGGCAACACATGC	151398303	151398362	151398251	151398273	151398366	151398391	151398251	151398391	140_43	43
8_21621463_21621522	67458	2	30	AC	8	60	CTACACGACGCTCTTCCGATCTAATAAACCCAGTGAAACCCAGCC	CAGACGTGTGCTCTTCCGATCTGATTGGGACCTCAAAGTGAGACC	21621463	21621522	21621394	21621416	21621532	21621554	21621394	21621554	140_43	43
6_75917885_75917944	70753	2	30	AC	6	60	CTACACGACGCTCTTCCGATCTCCGTCCAGAAAGGGAAAAGGAAA	CAGACGTGTGCTCTTCCGATCTACATGCTCCTCAGTCAACAACTC	75917885	75917944	75917761	75917783	75917951	75917973	75917761	75917973	140_43	43
13_77630235_77630294	30822	2	30	AC	13	60	CTACACGACGCTCTTCCGATCTTTGTTGCCACAAATAAGACACGC	CAGACGTGTGCTCTTCCGATCTTACCTGTTCACTTCTGTCACCTG	77630235	77630294	77630202	77630224	77630324	77630346	77630202	77630346	141_43	43
3_59656365_59656424	46594	2	30	AC	3	60	CTACACGACGCTCTTCCGATCTGCTCAGATCAATCAGCTGGAGTC	CAGACGTGTGCTCTTCCGATCTAAGTTTTGACAAGTGAGTTGCCC	59656365	59656424	59656284	59656306	59656474	59656496	59656284	59656496	141_43	43
8_67070377_67070436	48546	2	30	AC	8	60	CTACACGACGCTCTTCCGATCTGATACTTGAGCTGGACACAGCAG	CAGACGTGTGCTCTTCCGATCTAGGATTTCAATGCCAAAGTCCCT	67070377	67070436	67070326	67070348	67070466	67070488	67070326	67070488	141_43	43
22_35812505_35812564	57907	2	30	AC	22	60	CTACACGACGCTCTTCCGATCTATTGGGACCAAGTTCTCTTTGCC	CAGACGTGTGCTCTTCCGATCTTAACAGGCGACAGACGACGAAAA	35812505	35812564	35812469	35812491	35812607	35812629	35812469	35812629	141_43	43
3_50505812_50505871	49306	2	30	AC	3	60	CTACACGACGCTCTTCCGATCTGACCTCTGAAGAGAACCAGCAAG	CAGACGTGTGCTCTTCCGATCTATCTTGGGGATCAGCAAGGTTTG	50505812	50505871	50505777	50505799	50505894	50505916	50505777	50505916	142_43	43
2_43013150_43013209	47446	2	30	AC	2	60	CTACACGACGCTCTTCCGATCTGCATTTCAGTATGCTCTCCTCCC	CAGACGTGTGCTCTTCCGATCTTCCCAACTTTTCCTTTGTCCCTC	43013150	43013209	43013100	43013122	43013241	43013263	43013100	43013263	143_43	43
15_88755932_88755991	50485	2	30	AC	15	60	CTACACGACGCTCTTCCGATCTCTTCATGGAAGCTGTTTTGGCTG	CAGACGTGTGCTCTTCCGATCTGTCTGATGGATTTTTGCTCTGCC	88755932	88755991	88755903	88755925	88756040	88756062	88755903	88756062	143_43	43
21_45445703_45445762	53992	2	30	AC	21	60	CTACACGACGCTCTTCCGATCTCCCCACCTACAGTGGGTAGTATT	CAGACGTGTGCTCTTCCGATCTGTCCTTCCTGTGGTCTCTACCTT	45445703	45445762	45445638	45445660	45445770	45445792	45445638	45445792	143_43	43
3_53706786_53706845	46627	2	30	AC	3	60	CTACACGACGCTCTTCCGATCTGCTATTATTCGGCCTGAAAGCCT	CAGACGTGTGCTCTTCCGATCTATTCCCCATACACACACACAAGC	53706786	53706845	53706754	53706776	53706853	53706875	53706754	53706875	144_43	40
21_43950706_43950765	56198	2	30	AC	21	60	CTACACGACGCTCTTCCGATCTCAGCCTAATGAGCCACGTAAAGT	CAGACGTGTGCTCTTCCGATCTTTAGGCCAGTTTCACTCCACCTT	43950706	43950765	43950653	43950675	43950783	43950805	43950653	43950805	144_43	40
1_36194523_36194582	67779	2	30	AC	1	60	CTACACGACGCTCTTCCGATCTAAGGAGGGAGTATGCTTGGAAGT	CAGACGTGTGCTCTTCCGATCTTCATCTGGGTTTTCCAAACGTGA	36194523	36194582	36194440	36194462	36194616	36194638	36194440	36194638	144_43	40
10_117596978_117597037	29802	2	30	AC	10	60	CTACACGACGCTCTTCCGATCTAGTAAGCAAAGAGGCTTCCCAAG	CAGACGTGTGCTCTTCCGATCTAAATGCCTCCTAAGGGTGTTCTG	117596978	117597037	117596954	117596976	117597039	117597061	117596954	117597061	107_40	40
10_44406101_44406160	29803	2	30	AC	10	60	CTACACGACGCTCTTCCGATCTTAGGCCTTCTGTCTTCACACACT	CAGACGTGTGCTCTTCCGATCTTGGCAGCCTCTTAGGAAAATCAC	44406101	44406160	44406076	44406098	44406162	44406184	44406076	44406184	107_40	40
13_98860163_98860222	29823	2	30	AC	13	60	CTACACGACGCTCTTCCGATCTATGAATATACTGCTCCCCGACCA	CAGACGTGTGCTCTTCCGATCTATCTAGAATCCCAGCCTAGTGCC	98860163	98860222	98860133	98860155	98860273	98860295	98860133	98860295	107_40	40
15_55921574_55921633	29827	2	30	AC	15	60	CTACACGACGCTCTTCCGATCTACAGTACACATTTTTGTTTGGCT	CAGACGTGTGCTCTTCCGATCTCGTGTGCATGTTTCAAATGTTCC	55921574	55921633	55921532	55921554	55921692	55921714	55921532	55921714	107_40	40
15_89658602_89658661	29829	2	30	AC	15	60	CTACACGACGCTCTTCCGATCTGTTGCTGTTGCTTTTGTCATTGC	CAGACGTGTGCTCTTCCGATCTATATGCTCATCTGGCCTTTCCCA	89658602	89658661	89658550	89658572	89658711	89658733	89658550	89658733	107_40	40
16_85490186_85490245	29837	2	30	AC	16	60	CTACACGACGCTCTTCCGATCTGGAGGGGAGGGTCATTTTCCT	CAGACGTGTGCTCTTCCGATCTGAAGCAGAGCAAAAATGGCAGAC	85490186	85490245	85490162	85490182	85490247	85490269	85490162	85490269	107_40	40
5_10508848_10508907	29882	2	30	AC	5	60	CTACACGACGCTCTTCCGATCTGGAGAATAAGCTCTTCAGTACCCC	CAGACGTGTGCTCTTCCGATCTGGGGAATTCCAGCTGATAGGGAA	10508848	10508907	10508821	10508844	10508953	10508975	10508821	10508975	107_40	40
X_74123161_74123220	28862	2	30	AC	X	60	CTACACGACGCTCTTCCGATCTAGTCCTCACTGATTCTCAGGCAT	CAGACGTGTGCTCTTCCGATCTGGCTCTATTCTTTCTCACAGGGC	74123161	74123220	74123138	74123160	74123282	74123304	74123138	74123304	118_40	40
X_36930182_36930241	28863	2	30	AC	X	60	CTACACGACGCTCTTCCGATCTATAAGGACCCTTGCATACTGGAT	CAGACGTGTGCTCTTCCGATCTACAGTCTTTCTGAAACATTCAAGGTC	36930182	36930241	36930151	36930173	36930289	36930314	36930151	36930314	118_40	40
X_17691298_17691357	28864	2	30	AC	X	60	CTACACGACGCTCTTCCGATCTATTCAACTCACGTTTGAGCACCT	CAGACGTGTGCTCTTCCGATCTAAGGGAAGTGTCTTAGTCCCTGG	17691298	17691357	17691227	17691249	17691375	17691397	17691227	17691397	118_40	40
X_70573031_70573090	28865	2	30	AC	X	60	CTACACGACGCTCTTCCGATCTCAGACTTGTTTGTACATGGCTGC	CAGACGTGTGCTCTTCCGATCTCTGGCCAGGAGAGAAAAGAACAG	70573031	70573090	70572977	70572999	70573130	70573152	70572977	70573152	118_40	40
X_9460879_9460938	28867	2	30	AC	X	60	CTACACGACGCTCTTCCGATCTTGATTGATTCATGGCACGGTGAT	CAGACGTGTGCTCTTCCGATCTCCAGCACATTCCCAAATGGTTTC	9460879	9460938	9460798	9460820	9460962	9460984	9460798	9460984	118_40	40
X_151987651_151987710	28869	2	30	AC	X	60	CTACACGACGCTCTTCCGATCTACAGAGGATCTCTAAACCAGCCC	CAGACGTGTGCTCTTCCGATCTCACCCACTGCTCTAGATTTGGAC	151987651	151987710	151987619	151987641	151987768	151987790	151987619	151987790	118_40	40
X_145434297_145434356	28728	3	20	AAG	X	60	CTACACGACGCTCTTCCGATCTAGTGTTACATATAAAAGAATGCTGAGA	CAGACGTGTGCTCTTCCGATCTTTCCTTTCCTTCTATTTTCTTCAGTTT	145434297	145434356	145434235	145434261	145434362	145434388	145434235	145434388	113_40	40
15_29331302_29331359	38624	2	29	AC	15	58	CTACACGACGCTCTTCCGATCTTCCTTTGAGCATGCAGCCTTATT	CAGACGTGTGCTCTTCCGATCTTTAGGGAAGCAATGCAACTCCTC	29331302	29331359	29331263	29331285	29331375	29331397	29331263	29331397	136_43	43
1_53658312_53658369	53452	2	29	AC	1	58	CTACACGACGCTCTTCCGATCTCCGTGTCACCTGCCTGTATTATC	CAGACGTGTGCTCTTCCGATCTCAAATTTGAGGCTGCAGTGAGTG	53658312	53658369	53658287	53658309	53658417	53658439	53658287	53658439	136_43	43
10_99829321_99829378	68059	2	29	AC	10	58	CTACACGACGCTCTTCCGATCTAAGAGTCGCTCCTCTCTGAACTT	CAGACGTGTGCTCTTCCGATCTGACATCTCACAAGGCAAGATCCA	99829321	99829378	99829243	99829265	99829429	99829451	99829243	99829451	136_43	43
7_29444781_29444838	33760	2	29	AC	7	58	CTACACGACGCTCTTCCGATCTTGTATGGAGTGCTTATGTCACCA	CAGACGTGTGCTCTTCCGATCTCATCGGGTTGAGCTGAGAAGAAA	29444781	29444838	29444757	29444779	29444868	29444890	29444757	29444890	137_43	43
3_58250115_58250172	44434	2	29	AC	3	58	CTACACGACGCTCTTCCGATCTGGGGCATGAGGTTTCAAAGATTC	CAGACGTGTGCTCTTCCGATCTGAACTCAAGTGATCCTGCCACTG	58250115	58250172	58250029	58250051	58250192	58250214	58250029	58250214	137_43	43
15_70861213_70861270	44539	2	29	AC	15	58	CTACACGACGCTCTTCCGATCTGGGCTAGCATTGAGCTTCAGATT	CAGACGTGTGCTCTTCCGATCTGAGCCACTGAATAGAGGAGCTTG	70861213	70861270	70861160	70861182	70861308	70861330	70861160	70861330	137_43	43
4_25959294_25959351	55963	2	29	AC	4	58	CTACACGACGCTCTTCCGATCTCAGGGCTGGAGCAGAAATACAAT	CAGACGTGTGCTCTTCCGATCTGGGCTTTGAACAGTGTCTACTGA	25959294	25959351	25959262	25959284	25959416	25959438	25959262	25959438	137_43	43
13_97391474_97391531	57236	2	29	AC	13	58	CTACACGACGCTCTTCCGATCTCAAGTGTTAGAGAATCCCAGGGC	CAGACGTGTGCTCTTCCGATCTCACTCGAGAGTCAAAGGCAAAGA	97391474	97391531	97391410	97391432	97391578	97391600	97391410	97391600	137_43	43
15_81664691_81664748	69193	2	29	AC	15	58	CTACACGACGCTCTTCCGATCTAAAGACTCTCCACCAACACACAC	CAGACGTGTGCTCTTCCGATCTGCTCAGTCACTCTTGACCTGAAT	81664691	81664748	81664609	81664631	81664805	81664827	81664609	81664827	137_43	43
17_38350485_38350542	34478	2	29	AC	17	58	CTACACGACGCTCTTCCGATCTTGGGACCCCCAGGAATATTATGT	CAGACGTGTGCTCTTCCGATCTTCAATTACCAGATGCACTCCTGC	38350485	38350542	38350458	38350480	38350556	38350578	38350458	38350578	138_43	43
8_66932830_66932887	51649	2	29	AC	8	58	CTACACGACGCTCTTCCGATCTCTCCCTGTCCCTTACTCAACACT	CAGACGTGTGCTCTTCCGATCTGACGGCAGAATGAAACCTTGTCT	66932830	66932887	66932776	66932798	66932892	66932914	66932776	66932914	138_43	43
22_29617056_29617113	62312	2	29	AC	22	58	CTACACGACGCTCTTCCGATCTAGCAGCTGTAGAGATTAGGGGAG	CAGACGTGTGCTCTTCCGATCTACAAACCCCAGCTCCACTCT	29617056	29617113	29617017	29617039	29617167	29617186	29617017	29617186	138_43	43
1_184599443_184599500	68086	2	29	AC	1	58	CTACACGACGCTCTTCCGATCTAAGAGCTCCCTAACTCCACCTAC	CAGACGTGTGCTCTTCCGATCTACTCCTCTTCGGCATGAGACTAA	184599443	184599500	184599400	184599422	184599544	184599566	184599400	184599566	138_43	43
10_107513065_107513122	34720	2	29	AC	10	58	CTACACGACGCTCTTCCGATCTTGGCAGTCTCAGCTTCATTTCAA	CAGACGTGTGCTCTTCCGATCTACATATCCATAGTCAGGAGAGAACT	107513065	107513122	107513028	107513050	107513130	107513154	107513028	107513154	139_43	43
13_82824205_82824262	43911	2	29	AC	13	58	CTACACGACGCTCTTCCGATCTGGTGGGAGGTTATCCCATATCAC	CAGACGTGTGCTCTTCCGATCTGGACTGTTCAGTTTATGTCCCCC	82824205	82824262	82824155	82824177	82824271	82824293	82824155	82824293	139_43	43
3_117480430_117480487	45024	2	29	AC	3	58	CTACACGACGCTCTTCCGATCTGGCGAGAGGACCGTATTTACTTG	CAGACGTGTGCTCTTCCGATCTAATATCCTCTGTGTCCCTCTCCC	117480430	117480487	117480392	117480414	117480496	117480518	117480392	117480518	139_43	43
6_111889636_111889693	52785	2	29	AC	6	58	CTACACGACGCTCTTCCGATCTCCTTCTTGGGCTCAGGCTTATAC	CAGACGTGTGCTCTTCCGATCTATCCCTCTTCCCATCAAGAGCAT	111889636	111889693	111889607	111889629	111889717	111889739	111889607	111889739	139_43	43
2_74703172_74703229	69533	2	29	AC	2	58	CTACACGACGCTCTTCCGATCTAAAAGAAAGACATACCCTGCCCC	CAGACGTGTGCTCTTCCGATCTTTTCTTCCCTCAATTTCTGCCCA	74703172	74703229	74703139	74703161	74703268	74703290	74703139	74703290	139_43	43
18_42733883_42733940	37742	2	29	AC	18	58	CTACACGACGCTCTTCCGATCTTCTGTTGGATGCCATAGTTATTTGGA	CAGACGTGTGCTCTTCCGATCTTGTGTTCTTAGTTTTTGCCAGTCA	42733883	42733940	42733816	42733841	42733996	42734019	42733816	42734019	140_43	43
1_62490330_62490387	42804	2	29	AC	1	58	CTACACGACGCTCTTCCGATCTGTGGAATTCCTGTTTCCTTGGGT	CAGACGTGTGCTCTTCCGATCTAAGAATTGGCTCCTTCACCTTCC	62490330	62490387	62490284	62490306	62490425	62490447	62490284	62490447	140_43	43
4_174188020_174188077	43513	2	29	AC	4	58	CTACACGACGCTCTTCCGATCTGTATAATGACGGCTACCTGAGGC	CAGACGTGTGCTCTTCCGATCTTTAGCCAACCCCTCTTTATCCCA	174188020	174188077	174187989	174188011	174188092	174188114	174187989	174188114	140_43	43
7_29109387_29109444	50420	2	29	AC	7	58	CTACACGACGCTCTTCCGATCTCTTCGGCAATTCATTGCTATCCC	CAGACGTGTGCTCTTCCGATCTGGAGATAGGTCATCTACTGTCCCT	29109387	29109444	29109330	29109352	29109458	29109481	29109330	29109481	140_43	43
13_41336919_41336976	34667	2	29	AC	13	58	CTACACGACGCTCTTCCGATCTTGGCCCAACTCCATCACTCTTAT	CAGACGTGTGCTCTTCCGATCTGGGAGGGATGTAGGAGAGGAGAT	41336919	41336976	41336858	41336880	41336987	41337009	41336858	41337009	141_43	43
16_26005271_26005328	37491	2	29	AC	16	58	CTACACGACGCTCTTCCGATCTTCTTTCTGGTTTGCAGACTGCTT	CAGACGTGTGCTCTTCCGATCTTCATGAGGGATGGTTACCCATGAT	26005271	26005328	26005221	26005243	26005388	26005411	26005221	26005411	141_43	43
15_88832539_88832596	48681	2	29	AC	15	58	CTACACGACGCTCTTCCGATCTGAGGTCATGGTCAGTGCTACATC	CAGACGTGTGCTCTTCCGATCTAACATCCTGGGTACATGCACTTG	88832539	88832596	88832461	88832483	88832606	88832628	88832461	88832628	141_43	43
5_152549421_152549478	49386	2	29	AC	5	58	CTACACGACGCTCTTCCGATCTGACATCACACGACAGGCAAAAAG	CAGACGTGTGCTCTTCCGATCTACCAAACACCAAGTCCCTCTTTC	152549421	152549478	152549367	152549389	152549514	152549536	152549367	152549536	141_43	43
17_82621_82678	52259	2	29	AC	17	58	CTACACGACGCTCTTCCGATCTCGTTCTCAGGTGGTTCAAAGACA	CAGACGTGTGCTCTTCCGATCTTTCCTCCCTGCATGGATTCTGTA	82621	82678	82560	82582	82735	82757	82560	82757	141_43	43
13_52445922_52445979	30279	2	29	AC	13	58	CTACACGACGCTCTTCCGATCTTTTGTAAGCCACTAAGTTTTAGGGT	CAGACGTGTGCTCTTCCGATCTTGTTAGAAGGGACAAGTTTGGCT	52445922	52445979	52445861	52445885	52446041	52446063	52445861	52446063	142_43	43
17_71326685_71326742	47194	2	29	AC	17	58	CTACACGACGCTCTTCCGATCTGCCATTTCACCACCCATCTTCTT	CAGACGTGTGCTCTTCCGATCTTGAACTTTGGCCATCTACAGCTC	71326685	71326742	71326646	71326668	71326785	71326807	71326646	71326807	142_43	43
10_71303601_71303658	50968	2	29	AC	10	58	CTACACGACGCTCTTCCGATCTCTGGAGAAAGAAGGGGAGGAGAA	CAGACGTGTGCTCTTCCGATCTCTTTGTTCCTTTCCTGGTCTGGG	71303601	71303658	71303551	71303573	71303672	71303694	71303551	71303694	142_43	43
15_83334129_83334186	62666	2	29	AC	15	58	CTACACGACGCTCTTCCGATCTAGATCTTCTTCCTGTGTGTGTGG	CAGACGTGTGCTCTTCCGATCTGAAGCCCCAGACCCATCTGT	83334129	83334186	83334045	83334067	83334222	83334241	83334045	83334241	142_43	43
11_65211735_65211792	68684	2	29	AC	11	58	CTACACGACGCTCTTCCGATCTAACACATTCCCCACCCCTTTGAG	CAGACGTGTGCTCTTCCGATCTCCCCCATTTCTCCACAACTTCTC	65211735	65211792	65211661	65211683	65211800	65211822	65211661	65211822	142_43	43
11_43575348_43575405	37639	2	29	AC	11	58	CTACACGACGCTCTTCCGATCTTCTTCCTACCAGGATTTTGCACG	CAGACGTGTGCTCTTCCGATCTAGGCTGGGTAAGTATGAAGAGCA	43575348	43575405	43575284	43575306	43575451	43575473	43575284	43575473	143_43	43
9_122128782_122128839	37797	2	29	AC	9	58	CTACACGACGCTCTTCCGATCTTCTGTCTCTCTCTCAGTCCTCCC	CAGACGTGTGCTCTTCCGATCTGGCCCTGAAGAGAAAAGATCCAA	122128782	122128839	122128750	122128772	122128864	122128886	122128750	122128886	143_43	43
7_76889257_76889314	37926	2	29	AC	7	58	CTACACGACGCTCTTCCGATCTTCTGCTGCATGGTTAGAAAGCAA	CAGACGTGTGCTCTTCCGATCTAGCGTTTTGACTTCTTGTTCCAA	76889257	76889314	76889197	76889219	76889351	76889373	76889197	76889373	143_43	43
15_88099907_88099964	49568	2	29	AC	15	58	CTACACGACGCTCTTCCGATCTGAATCAGCCTTCAAACTTTGCCA	CAGACGTGTGCTCTTCCGATCTCAAGAGCAGAGTTGTAAACTGCC	88099907	88099964	88099882	88099904	88099993	88100015	88099882	88100015	143_43	43
7_71803456_71803513	56750	2	29	AC	7	58	CTACACGACGCTCTTCCGATCTCACCTCTCCACTGTTTGGTTCAA	CAGACGTGTGCTCTTCCGATCTAATGCTAAATGCTAAAGGCGTGG	71803456	71803513	71803392	71803414	71803561	71803583	71803392	71803583	144_43	40
X_11095894_11095951	29428	2	29	AG	X	58	CTACACGACGCTCTTCCGATCTAACATTCTCCACACCTATCCCCA	CAGACGTGTGCTCTTCCGATCTAAATCTTCTCTTCCCCCACTGGA	11095894	11095951	11095789	11095811	11095954	11095976	11095789	11095976	97_40	40
X_140880546_140880603	29429	2	29	AG	X	58	CTACACGACGCTCTTCCGATCTACAAAGGCTTAAAGGTGGGAAGA	CAGACGTGTGCTCTTCCGATCTTACAGCATGGCCTTGATCTCTCT	140880546	140880603	140880407	140880429	140880598	140880620	140880407	140880620	97_40	40
X_106259605_106259662	29430	2	29	AG	X	58	CTACACGACGCTCTTCCGATCTCCACCCTTGGGTATGCTGAAAAT	CAGACGTGTGCTCTTCCGATCTACAATTCATATGGGGTCTTATGCTCA	106259605	106259662	106259573	106259595	106259705	106259730	106259573	106259730	97_40	40
9_104805479_104805536	29923	2	29	AC	9	58	CTACACGACGCTCTTCCGATCTTCATCACAGCTGCACTGAAATCT	CAGACGTGTGCTCTTCCGATCTAAGTGTAATGCACAGACACCTCC	104805479	104805536	104805413	104805435	104805577	104805599	104805413	104805599	107_40	40
X_25971976_25972033	28875	2	29	AC	X	58	CTACACGACGCTCTTCCGATCTGGTTCTCCAGAGATATGGAACAGG	CAGACGTGTGCTCTTCCGATCTCATAACTGTGTGAGCTGGCTTCT	25971976	25972033	25971928	25971951	25972063	25972085	25971928	25972085	117_40	40
X_109351297_109351354	28876	2	29	AC	X	58	CTACACGACGCTCTTCCGATCTTGTGAGTGCCAAGAGAAGAGGTA	CAGACGTGTGCTCTTCCGATCTACGCCTCTTAGACCTCAACACTA	109351297	109351354	109351214	109351236	109351380	109351402	109351214	109351402	117_40	40
X_143846203_143846260	28866	2	29	AC	X	58	CTACACGACGCTCTTCCGATCTCAGAGAGATAAGGGGGTGAGAGG	CAGACGTGTGCTCTTCCGATCTTCAACTCATTCTCGGTAAAGGTCA	143846203	143846260	143846169	143846191	143846320	143846343	143846169	143846343	118_40	40
X_68527994_68528051	28868	2	29	AC	X	58	CTACACGACGCTCTTCCGATCTAATCCACTTCAACTCCTGCTCCT	CAGACGTGTGCTCTTCCGATCTTTTCACTGCTCAATGCTTCCTGA	68527994	68528051	68527965	68527987	68528081	68528103	68527965	68528103	118_40	40
X_46534497_46534554	28870	2	29	AC	X	58	CTACACGACGCTCTTCCGATCTACTCCTTGGGAAATCCTATCCCC	CAGACGTGTGCTCTTCCGATCTCCCATAGAAGCCGTTATTGGTGG	46534497	46534554	46534386	46534408	46534569	46534591	46534386	46534591	118_40	40
X_6834233_6834290	28871	2	29	AC	X	58	CTACACGACGCTCTTCCGATCTCACCCACCAACTCATGCTTTTTC	CAGACGTGTGCTCTTCCGATCTAGGCTCAGCACAACTTACACAAT	6834233	6834290	6834209	6834231	6834350	6834372	6834209	6834372	118_40	40
X_15689003_15689060	28872	2	29	AC	X	58	CTACACGACGCTCTTCCGATCTCCCACACAAGGAAGAACAGAAGA	CAGACGTGTGCTCTTCCGATCTAGTTCTAATAAGCTTGTGACTGGA	15689003	15689060	15688966	15688988	15689124	15689147	15688966	15689147	118_40	40
X_31985415_31985472	28873	2	29	AC	X	58	CTACACGACGCTCTTCCGATCTGCTATAATTCTTTAACTTTGGCAAGGG	CAGACGTGTGCTCTTCCGATCTCCTCTTTCCCTCTTTATTCATGTTAC	31985415	31985472	31985388	31985414	31985534	31985559	31985388	31985559	118_40	40
X_14749014_14749071	28874	2	29	AC	X	58	CTACACGACGCTCTTCCGATCTGCTGTTTGCCTTTTGGTCCTTTT	CAGACGTGTGCTCTTCCGATCTTTGGTCCTCGACTCACTATAGGC	14749014	14749071	14748945	14748967	14749111	14749133	14748945	14749133	118_40	40
X_150872330_150872385	29544	1	56	A	X	56	CTACACGACGCTCTTCCGATCTGAGTACTCCTGGGCATGGTTTTT	CAGACGTGTGCTCTTCCGATCTCCGCGATACCCAAAGTCAATAGT	150872330	150872385	150872312	150872334	150872441	150872463	150872312	150872463	120_40	40
1_109258943_109258998	58181	2	28	AC	1	56	CTACACGACGCTCTTCCGATCTATTAGCTTGGGGAGCAGAAGAGA	CAGACGTGTGCTCTTCCGATCTTCCCCTACAGAATAGAAAGCCCC	109258943	109258998	109258919	109258941	109259019	109259041	109258919	109259041	137_43	43
2_163695573_163695628	43724	2	28	AC	2	56	CTACACGACGCTCTTCCGATCTGGTTTTGCTGGAAGGAGAGAGAG	CAGACGTGTGCTCTTCCGATCTGTTTTGGAGATTTCTTGGCTGGC	163695573	163695628	163695494	163695516	163695695	163695717	163695494	163695717	138_43	43
1_87083880_87083935	59820	2	28	AC	1	56	CTACACGACGCTCTTCCGATCTAGTTGGTGTTCAGAGAAGGGAGA	CAGACGTGTGCTCTTCCGATCTCCTATCTTTATGCCCATGCCTCC	87083880	87083935	87083847	87083869	87083977	87083999	87083847	87083999	138_43	43
1_92881704_92881759	67995	2	28	AC	1	56	CTACACGACGCTCTTCCGATCTAAGCAACTAAGCAAGACCCCATT	CAGACGTGTGCTCTTCCGATCTTCATGGAAGACTTCTTCAAGCCC	92881704	92881759	92881621	92881643	92881762	92881784	92881621	92881784	139_43	43
2_161590072_161590127	42403	2	28	AC	2	56	CTACACGACGCTCTTCCGATCTGTTCCCAGGTACATTTGCGTACT	CAGACGTGTGCTCTTCCGATCTTGATTTGGATAATTGTTCCGGGGT	161590072	161590127	161589996	161590018	161590142	161590165	161589996	161590165	141_43	43
X_129086775_129086830	29431	2	28	AG	X	56	CTACACGACGCTCTTCCGATCTCCTCTTGGGCTCTTTGTCTGTC	CAGACGTGTGCTCTTCCGATCTGTGTCTCCTGTTACCAACCGAAA	129086775	129086830	129086696	129086717	129086896	129086918	129086696	129086918	97_40	40
X_131337535_131337590	29432	2	28	AG	X	56	CTACACGACGCTCTTCCGATCTCCTGATTCCTGCGATCCTAAGTG	CAGACGTGTGCTCTTCCGATCTTCTTTCCTGTAGATTGTGTTCTTGT	131337535	131337590	131337460	131337482	131337592	131337616	131337460	131337616	97_40	40
X_124111817_124111872	29433	2	28	AG	X	56	CTACACGACGCTCTTCCGATCTGGCTCTGTTTAGTGTGTGTGTGT	CAGACGTGTGCTCTTCCGATCTGCAGATCGAATATGGCAAAAGAGAC	124111817	124111872	124111778	124111800	124111937	124111961	124111778	124111961	97_40	40
X_5067344_5067399	28877	2	28	AC	X	56	CTACACGACGCTCTTCCGATCTACCATGACTAAGTTGACCTGGGA	CAGACGTGTGCTCTTCCGATCTAGAGCTGAAAGACAGAAAGATTGT	5067344	5067399	5067316	5067338	5067465	5067488	5067316	5067488	117_40	40
X_36354360_36354415	28878	2	28	AC	X	56	CTACACGACGCTCTTCCGATCTACCCAAAACCTAAACCCAACACA	CAGACGTGTGCTCTTCCGATCTCAGAGAAGTTAGGCTTGAAGGCA	36354360	36354415	36354274	36354296	36354467	36354489	36354274	36354489	117_40	40
X_54301849_54301904	28879	2	28	AC	X	56	CTACACGACGCTCTTCCGATCTACTAGAGGTGGTAAAATGTCGGT	CAGACGTGTGCTCTTCCGATCTAGTGGTTGCTCTAAGGTATCCAT	54301849	54301904	54301804	54301826	54301906	54301928	54301804	54301928	117_40	40
X_152604119_152604174	28880	2	28	AC	X	56	CTACACGACGCTCTTCCGATCTATTAAATGTGGGTGGCTTGGGAG	CAGACGTGTGCTCTTCCGATCTAACCATCCTGTTAACATGCCCTC	152604119	152604174	152604093	152604115	152604233	152604255	152604093	152604255	117_40	40
X_29847273_29847328	28881	2	28	AC	X	56	CTACACGACGCTCTTCCGATCTCAAGAGTTATGAGCCAGGAACCA	CAGACGTGTGCTCTTCCGATCTCCATCATAGTTCCATGGAGGGTG	29847273	29847328	29847237	29847259	29847339	29847361	29847237	29847361	117_40	40
X_11220110_11220165	28882	2	28	AC	X	56	CTACACGACGCTCTTCCGATCTCACTACTGTACCACTGTGTGCAA	CAGACGTGTGCTCTTCCGATCTGCTGAGTATTTCCTGTGGACCAG	11220110	11220165	11220071	11220093	11220170	11220192	11220071	11220192	117_40	40
X_68289411_68289466	28883	2	28	AC	X	56	CTACACGACGCTCTTCCGATCTCTAAAGCTCCCCATGCTTTAGGG	CAGACGTGTGCTCTTCCGATCTGAAAGATCATGGCTCTGGGAGTG	68289411	68289466	68289361	68289383	68289499	68289521	68289361	68289521	117_40	40
X_51887069_51887124	28884	2	28	AC	X	56	CTACACGACGCTCTTCCGATCTGAGCAGATGGGAGAAAAGGATGG	CAGACGTGTGCTCTTCCGATCTAGGGGAAACCAATGAAGAGTTGC	51887069	51887124	51887011	51887033	51887156	51887178	51887011	51887178	117_40	40
X_122479291_122479346	28885	2	28	AC	X	56	CTACACGACGCTCTTCCGATCTGCACATGCCCAGTTAGGTTATGA	CAGACGTGTGCTCTTCCGATCTCAGTAGCCTTGTTTGGGAAGGAG	122479291	122479346	122479228	122479250	122479347	122479369	122479228	122479369	117_40	40
X_16848954_16849009	28886	2	28	AC	X	56	CTACACGACGCTCTTCCGATCTGCTTCAGCAGATGAAACCGTAAT	CAGACGTGTGCTCTTCCGATCTCCTGGGCAATTTAGCAAGAAACTG	16848954	16849009	16848928	16848950	16849017	16849040	16848928	16849040	117_40	40
X_31452536_31452591	28887	2	28	AC	X	56	CTACACGACGCTCTTCCGATCTTCCTTCAGATCTCGGTCAAAGGT	CAGACGTGTGCTCTTCCGATCTTGTGTCAGGAAAGAAAATACAGGACA	31452536	31452591	31452448	31452470	31452620	31452645	31452448	31452645	117_40	40
X_22947714_22947769	28888	2	28	AC	X	56	CTACACGACGCTCTTCCGATCTTGGTCCCCTATTTGTCTTGTCCT	CAGACGTGTGCTCTTCCGATCTTCTTTACCCATCTGTCCTCCTGG	22947714	22947769	22947686	22947708	22947776	22947798	22947686	22947798	117_40	40
X_29623189_29623244	28889	2	28	AC	X	56	CTACACGACGCTCTTCCGATCTTTTTTGGGAGATGCTTCTGTGCT	CAGACGTGTGCTCTTCCGATCTTGATGGCTTCCTTCCATTCTGTG	29623189	29623244	29623147	29623169	29623370	29623392	29623147	29623392	117_40	40
X_10105096_10105149	70615	2	27	AT	X	54	CTACACGACGCTCTTCCGATCTCTGGGCAGGGATCGTTTGAATAA	CAGACGTGTGCTCTTCCGATCTTTGTATGTGGTGGAGCACAACTG	10105096	10105149	10105074	10105096	10105225	10105247	10105074	10105247	142_43	43
X_7867668_7867721	29434	2	27	AG	X	54	CTACACGACGCTCTTCCGATCTAGCTAAATACTCAGAGAGGTATGGC	CAGACGTGTGCTCTTCCGATCTCCCCACCCCAGTTTAGGAGATTA	7867668	7867721	7867643	7867667	7867742	7867764	7867643	7867764	97_40	40
X_41969881_41969934	29435	2	27	AG	X	54	CTACACGACGCTCTTCCGATCTATCTTCATGCCACTCTGTTGGTC	CAGACGTGTGCTCTTCCGATCTTGTGCCCTCAGGTTATTCTACCT	41969881	41969934	41969856	41969878	41970012	41970034	41969856	41970034	97_40	40
X_113571144_113571197	29436	2	27	AG	X	54	CTACACGACGCTCTTCCGATCTTGTTTCCAAATCAAAGGAATCGT	CAGACGTGTGCTCTTCCGATCTTTCCATGTGAACTTGACTTTTTCA	113571144	113571197	113571065	113571087	113571253	113571276	113571065	113571276	97_40	40
X_136635506_136635559	28895	2	27	AC	X	54	CTACACGACGCTCTTCCGATCTCTGAGCTACAGAGTGCTTTTCCA	CAGACGTGTGCTCTTCCGATCTCACAATTCCATAACTCCCCCACA	136635506	136635559	136635471	136635493	136635561	136635583	136635471	136635583	116_40	40
X_54877876_54877929	28896	2	27	AC	X	54	CTACACGACGCTCTTCCGATCTGACCAAAGGGAAACCTCATCCAG	CAGACGTGTGCTCTTCCGATCTACTTCCGGCCTCTTTCTCTCTTT	54877876	54877929	54877850	54877872	54877978	54878000	54877850	54878000	116_40	40
X_107109653_107109706	28890	2	27	AC	X	54	CTACACGACGCTCTTCCGATCTACACCTTCATGCTTTCGTACTCC	CAGACGTGTGCTCTTCCGATCTTTGGCAGTACTCACTGTAGGTCA	107109653	107109706	107109588	107109610	107109712	107109734	107109588	107109734	117_40	40
X_28678204_28678257	28891	2	27	AC	X	54	CTACACGACGCTCTTCCGATCTCACTTGTGATAAACCGCTCCAGA	CAGACGTGTGCTCTTCCGATCTTCCTGGGCATGACATGAGAAAAC	28678204	28678257	28678154	28678176	28678305	28678327	28678154	28678327	117_40	40
X_22778050_22778103	28892	2	27	AC	X	54	CTACACGACGCTCTTCCGATCTCCTACTCCTTTTCTCCCAACTGC	CAGACGTGTGCTCTTCCGATCTTTAGGGGTCACTACTCAACCCAG	22778050	22778103	22778012	22778034	22778153	22778175	22778012	22778175	117_40	40
X_109370039_109370092	28893	2	27	AC	X	54	CTACACGACGCTCTTCCGATCTCTAGGTTTATTTCCTGGCTGGGC	CAGACGTGTGCTCTTCCGATCTTGAACACCCACTCCATGAAGAAC	109370039	109370092	109370010	109370032	109370115	109370137	109370010	109370137	117_40	40
X_52626499_52626552	28894	2	27	AC	X	54	CTACACGACGCTCTTCCGATCTCTATTGGTTAGGGTTCCCGTGTG	CAGACGTGTGCTCTTCCGATCTCTTGCCATTCACAACAGTTGCAT	52626499	52626552	52626481	52626503	52626599	52626621	52626481	52626621	117_40	40
X_28085605_28085658	28897	2	27	AC	X	54	CTACACGACGCTCTTCCGATCTGCACCTCACAACATGGCCTTAAA	CAGACGTGTGCTCTTCCGATCTTGTGTAAGGGCATTAGCGTCCTA	28085605	28085658	28085531	28085553	28085673	28085695	28085531	28085695	117_40	40
X_14709394_14709447	28898	2	27	AC	X	54	CTACACGACGCTCTTCCGATCTGCTCCCTGTATTTATCTGGCAACT	CAGACGTGTGCTCTTCCGATCTGATCAGTGATGTACACGCACGC	14709394	14709447	14709304	14709327	14709455	14709476	14709304	14709476	117_40	40
X_128205817_128205870	28899	2	27	AC	X	54	CTACACGACGCTCTTCCGATCTGTGCAGGAAAGGGATGTTGAGAA	CAGACGTGTGCTCTTCCGATCTTGTGAGTGGCTCTCTACTTGTGA	128205817	128205870	128205734	128205756	128205899	128205921	128205734	128205921	117_40	40
X_148380373_148380426	28900	2	27	AC	X	54	CTACACGACGCTCTTCCGATCTGTTCATGCAACTCTCCTCTCCTG	CAGACGTGTGCTCTTCCGATCTACAAAAGGGCTTATTGGAAGCCA	148380373	148380426	148380328	148380350	148380461	148380483	148380328	148380483	117_40	40
X_48844369_48844422	28901	2	27	AC	X	54	CTACACGACGCTCTTCCGATCTTACCCACGACCAAGAAAGAAAGG	CAGACGTGTGCTCTTCCGATCTACTACATAGTCAGGCAAGGTCCC	48844369	48844422	48844346	48844368	48844449	48844471	48844346	48844471	117_40	40
X_129356251_129356304	28902	2	27	AC	X	54	CTACACGACGCTCTTCCGATCTTGGTACTTACCATCAGCTGGCAT	CAGACGTGTGCTCTTCCGATCTGCAAAGCAAGGTTTGTACTCACT	129356251	129356304	129356210	129356232	129356332	129356354	129356210	129356354	117_40	40
X_45696897_45696950	28903	2	27	AC	X	54	CTACACGACGCTCTTCCGATCTTTACAATCACTGGGAAGAACCGC	CAGACGTGTGCTCTTCCGATCTCTTCTTTGACATGTGGTCCTGCT	45696897	45696950	45696856	45696878	45696991	45697013	45696856	45697013	117_40	40
X_31402427_31402480	28833	3	18	ACT	X	54	CTACACGACGCTCTTCCGATCTCGCGAGGGGATCAGGGTAATATC	CAGACGTGTGCTCTTCCGATCTATTCCACAGGTCCCTGTTCTCTT	31402427	31402480	31402397	31402419	31402542	31402564	31402397	31402564	146_42	42
X_150151872_150151925	28846	3	18	CCG	X	54	CTACACGACGCTCTTCCGATCTGAACAATACAGGTACGTCTCGCA	CAGACGTGTGCTCTTCCGATCTGGAAGGGAATGGGGAGTAGAGG	150151872	150151925	150151839	150151861	150151989	150152010	150151839	150152010	152_42	42
X_111681031_111681084	28809	3	18	ACC	X	54	CTACACGACGCTCTTCCGATCTTAAGTCATGGTAGTGGTGGTGGT	CAGACGTGTGCTCTTCCGATCTGACACTAAGCCCACCTACAACAG	111681031	111681084	111681006	111681028	111681152	111681174	111681006	111681174	154_42	42
Y_22661494_22661545	41527	2	26	AC	Y	52	CTACACGACGCTCTTCCGATCTTACCCTGCCATTTTGTGGTTTGT	CAGACGTGTGCTCTTCCGATCTTCACCAGAGACTCTTATCTTCGCT	22661494	22661545	22661455	22661477	22661585	22661608	22661455	22661608	144_43	40
X_119133778_119133829	29438	2	26	AG	X	52	CTACACGACGCTCTTCCGATCTATAGCCCTATAGCCTTCGCATCT	CAGACGTGTGCTCTTCCGATCTTTTCTCAGGCCGCGAGTCTA	119133778	119133829	119133710	119133732	119133846	119133865	119133710	119133865	97_40	40
X_71942556_71942607	29439	2	26	AG	X	52	CTACACGACGCTCTTCCGATCTAACCATGCACCCATGATTACACC	CAGACGTGTGCTCTTCCGATCTGCATGGACCTTATTGGCTCTTGA	71942556	71942607	71942413	71942435	71942633	71942655	71942413	71942655	97_40	40
X_6270981_6271032	29507	2	26	AT	X	52	CTACACGACGCTCTTCCGATCTCAGGAGAGTCACTTTCGTAAAGATATG	CAGACGTGTGCTCTTCCGATCTTTTCAGGGAGTGAGGGAGGAAAA	6270981	6271032	6270862	6270888	6271046	6271068	6270862	6271068	98_40	40
X_145274392_145274443	28915	2	26	AC	X	52	CTACACGACGCTCTTCCGATCTGCCATTTTCAGAACATCTTGGGC	CAGACGTGTGCTCTTCCGATCTGAAGCAAAATGGGTCTCCCATCA	145274392	145274443	145274311	145274333	145274482	145274504	145274311	145274504	116_40	40
X_43702604_43702655	28916	2	26	AC	X	52	CTACACGACGCTCTTCCGATCTGGAAGCATCGAAGTTAGGAGTGG	CAGACGTGTGCTCTTCCGATCTTGGACAGATATGTGTGTGCCTC	43702604	43702655	43702533	43702555	43702656	43702677	43702533	43702677	116_40	40
X_46179776_46179827	28917	2	26	AC	X	52	CTACACGACGCTCTTCCGATCTGTTGGGGAGAGAAACAGTGGAAG	CAGACGTGTGCTCTTCCGATCTTCTGGCTGTGTAGAAATGAAAGCA	46179776	46179827	46179717	46179739	46179859	46179882	46179717	46179882	116_40	40
X_37349432_37349483	28918	2	26	AC	X	52	CTACACGACGCTCTTCCGATCTTACAGTGGTAAGCTGCCATACCT	CAGACGTGTGCTCTTCCGATCTTCTTCCTTTTGCTTACTGCACCA	37349432	37349483	37349348	37349370	37349498	37349520	37349348	37349520	116_40	40
X_29239738_29239789	28919	2	26	AC	X	52	CTACACGACGCTCTTCCGATCTTACCGTCATTATGCCAAAGGAGC	CAGACGTGTGCTCTTCCGATCTCCTGGCCCATGTGAAGGTTTTAT	29239738	29239789	29239698	29239720	29239832	29239854	29239698	29239854	116_40	40
X_17977198_17977249	28920	2	26	AC	X	52	CTACACGACGCTCTTCCGATCTTATGCAGTGGAAGAGTCCCTCAG	CAGACGTGTGCTCTTCCGATCTCCCGATTTCCTCTAAAACAGTGTG	17977198	17977249	17977156	17977178	17977296	17977319	17977156	17977319	116_40	40
X_108970887_108970938	28921	2	26	AC	X	52	CTACACGACGCTCTTCCGATCTTGAATGCACTCTCCTGAATCACA	CAGACGTGTGCTCTTCCGATCTGAAAAAGTGCTGACCCCAGAGAT	108970887	108970938	108970809	108970831	108970965	108970987	108970809	108970987	116_40	40
X_49546253_49546304	28922	2	26	AC	X	52	CTACACGACGCTCTTCCGATCTTGCTATTACTATTACCATTTCCCCTT	CAGACGTGTGCTCTTCCGATCTAAGTGGCTTCTGTAGAGGCTTTC	49546253	49546304	49546227	49546252	49546361	49546383	49546227	49546383	116_40	40
X_114381470_114381521	28923	2	26	AC	X	52	CTACACGACGCTCTTCCGATCTTTACCTAGTTTCAGGGACTTACC	CAGACGTGTGCTCTTCCGATCTCAGGATTTCTTTGTTTCTGTCCCA	114381470	114381521	114381378	114381400	114381564	114381587	114381378	114381587	116_40	40
X_148597250_148597301	28942	2	26	AC	X	52	CTACACGACGCTCTTCCGATCTGGACAGCAGCCTGACTATCTTTA	CAGACGTGTGCTCTTCCGATCTTCAGTTCAAGTCCACTGAGGGAT	148597250	148597301	148597190	148597212	148597364	148597386	148597190	148597386	116_40	40
X_20780069_20780120	28944	2	26	AC	X	52	CTACACGACGCTCTTCCGATCTGGGTACCGTAAGGAATCTTTGGG	CAGACGTGTGCTCTTCCGATCTTGCATTCATTTAAAGCGTATATTTCCA	20780069	20780120	20779988	20780010	20780137	20780163	20779988	20780163	116_40	40
X_121407637_121407688	28904	2	26	AC	X	52	CTACACGACGCTCTTCCGATCTACACCTTGAAGGAAACAAAGACA	CAGACGTGTGCTCTTCCGATCTCATGACTCCTGGCATTCCTGATG	121407637	121407688	121407578	121407600	121407696	121407718	121407578	121407718	117_40	40
X_147558294_147558345	28905	2	26	AC	X	52	CTACACGACGCTCTTCCGATCTAGCTATAGCAGCCTTCATGTGAC	CAGACGTGTGCTCTTCCGATCTTGCTACACTCAAAGTTTTGGCCT	147558294	147558345	147558250	147558272	147558353	147558375	147558250	147558375	117_40	40
X_100735112_100735163	28906	2	26	AC	X	52	CTACACGACGCTCTTCCGATCTATGAATGGTGCTAGGATTTGGAG	CAGACGTGTGCTCTTCCGATCTGTATGGCTTCTGGGTCATTGCAT	100735112	100735163	100735089	100735111	100735170	100735192	100735089	100735192	117_40	40
X_45386687_45386738	28907	2	26	AC	X	52	CTACACGACGCTCTTCCGATCTATGTCCAGATGGAAATCAGGGGA	CAGACGTGTGCTCTTCCGATCTTGTCCCCAGTATCTGTTTTGTGC	45386687	45386738	45386659	45386681	45386741	45386763	45386659	45386763	117_40	40
X_135742265_135742316	28908	2	26	AC	X	52	CTACACGACGCTCTTCCGATCTCTCCCCCAGTCTCTCTTCTCAAT	CAGACGTGTGCTCTTCCGATCTGAGATAGGGACAGGGTGGAAAGA	135742265	135742316	135742231	135742253	135742346	135742368	135742231	135742368	117_40	40
X_142723297_142723348	28909	2	26	AC	X	52	CTACACGACGCTCTTCCGATCTCTCGAGCCCTTTTCTTCTCTTCC	CAGACGTGTGCTCTTCCGATCTCTTTGGCTTTTCCTGGCTTCTTG	142723297	142723348	142723254	142723276	142723373	142723395	142723254	142723395	117_40	40
X_78705944_78705995	28910	2	26	AC	X	52	CTACACGACGCTCTTCCGATCTCTCTGTAGCTGGCATGTTTCTGT	CAGACGTGTGCTCTTCCGATCTCTAGCAATGGAGTGATGAGACGG	78705944	78705995	78705857	78705879	78706024	78706046	78705857	78706046	117_40	40
X_5859222_5859273	28911	2	26	AC	X	52	CTACACGACGCTCTTCCGATCTGAGTGAGACACTCCCTCCTACAA	CAGACGTGTGCTCTTCCGATCTTGCTTAGGCCACTCTAGGACTTT	5859222	5859273	5859152	5859174	5859328	5859350	5859152	5859350	117_40	40
X_38819957_38820008	28912	2	26	AC	X	52	CTACACGACGCTCTTCCGATCTGATCAAACAAACACAGTCCCTGC	CAGACGTGTGCTCTTCCGATCTGGCCAAGACAAGTTAAATAGAACGAC	38819957	38820008	38819909	38819931	38820030	38820055	38819909	38820055	117_40	40
X_85570792_85570843	28913	2	26	AC	X	52	CTACACGACGCTCTTCCGATCTGATGTAGTGAAGCTGCCTAGCTG	CAGACGTGTGCTCTTCCGATCTGCTCCAATCTCCCTCTCTCTCTC	85570792	85570843	85570713	85570735	85570845	85570867	85570713	85570867	117_40	40
X_23557649_23557700	28914	2	26	AC	X	52	CTACACGACGCTCTTCCGATCTGCAGCCACTAAAAATCATGCTTCA	CAGACGTGTGCTCTTCCGATCTTTCCCATGTTCTGGGTTGACATT	23557649	23557700	23557621	23557644	23557727	23557749	23557621	23557749	117_40	40
X_3566648_3566699	42966	2	26	AC	X	52	CTACACGACGCTCTTCCGATCTGTGATGGGGCCATAAGGTTTCAA	CAGACGTGTGCTCTTCCGATCTAGCCTTATAGGGATAACATTGAACCT	3566648	3566699	3566603	3566625	3566729	3566754	3566603	3566754	124_40	40
X_66766357_66766407	28847	3	17	CCG	X	51	CTACACGACGCTCTTCCGATCTGAAGAAGGCCAGTTGTATGGACC	CAGACGTGTGCTCTTCCGATCTCACATCAGGTGCGGTGAAGTC	66766357	66766407	66766312	66766334	66766474	66766494	66766312	66766494	96_40	40
8_106416221_106416271	29914	3	17	AAC	8	51	CTACACGACGCTCTTCCGATCTTGGCATTGCAAACGGAACAAAAT	CAGACGTGTGCTCTTCCGATCTCCTGTAGTAAGAACCTAGCGCCT	106416221	106416271	106416141	106416163	106416292	106416314	106416141	106416314	118_40	40
3_14762041_14762091	29963	3	17	AAC	3	51	CTACACGACGCTCTTCCGATCTTGGGCAAGCAACTGGAATAGTAG	CAGACGTGTGCTCTTCCGATCTGCTGTGCTTCTCTCAGTCTTCAA	14762041	14762091	14761988	14762010	14762152	14762174	14761988	14762174	118_40	40
X_128102919_128102968	28964	2	25	AC	X	50	CTACACGACGCTCTTCCGATCTACATTTCTAGACACACAGAAGCG	CAGACGTGTGCTCTTCCGATCTAGCATATCTGCGACTACCTAAGC	128102919	128102968	128102886	128102908	128103029	128103051	128102886	128103051	146_42	42
X_50389528_50389577	28935	2	25	AC	X	50	CTACACGACGCTCTTCCGATCTCTTGCAGCCTGGTAATCAGGAAA	CAGACGTGTGCTCTTCCGATCTTCCCAGACTGATGAGAAAGCCAT	50389528	50389577	50389469	50389491	50389603	50389625	50389469	50389625	152_42	42
X_23423785_23423834	28936	2	25	AC	X	50	CTACACGACGCTCTTCCGATCTGAAGTAGCACTCACTCCTGTCTG	CAGACGTGTGCTCTTCCGATCTCACACACTCTAGACATTCACCCG	23423785	23423834	23423700	23423722	23423840	23423862	23423700	23423862	154_42	42
X_30517634_30517683	28955	2	25	AC	X	50	CTACACGACGCTCTTCCGATCTTTTGTCAGCATTCTCCCTCTTGA	CAGACGTGTGCTCTTCCGATCTTCTCCAGGTTACACAGCGTAGAT	30517634	30517683	30517591	30517613	30517741	30517763	30517591	30517763	154_42	42
X_34228537_34228586	29437	2	25	AG	X	50	CTACACGACGCTCTTCCGATCTAGATTCTGGCTTTTCCTTTCCAA	CAGACGTGTGCTCTTCCGATCTGTGAAAAATGTCAAAGTGCAAAAGGT	34228537	34228586	34228487	34228509	34228678	34228703	34228487	34228703	97_40	40
X_46946134_46946183	29440	2	25	AG	X	50	CTACACGACGCTCTTCCGATCTAGGAGGCTTCAGTTCCTTAGCTG	CAGACGTGTGCTCTTCCGATCTTAGCTTGCATCTTGGATCTTGGG	46946134	46946183	46946053	46946075	46946205	46946227	46946053	46946227	97_40	40
X_9057597_9057646	29441	2	25	AG	X	50	CTACACGACGCTCTTCCGATCTCAAAGCCGAATGAATCTCCCTGA	CAGACGTGTGCTCTTCCGATCTAATGTCTTGCTGCTAGGATTGCC	9057597	9057646	9057567	9057589	9057657	9057679	9057567	9057679	97_40	40
X_22515703_22515752	29444	2	25	AG	X	50	CTACACGACGCTCTTCCGATCTCAGCTGGAGTCAGTAGAACTGC	CAGACGTGTGCTCTTCCGATCTACATAAGAATCACAAAATCTCAGGGG	22515703	22515752	22515614	22515635	22515753	22515778	22515614	22515778	97_40	40
X_39940069_39940118	28924	2	25	AC	X	50	CTACACGACGCTCTTCCGATCTAAGTGTTCTCAAATGCACAGGGT	CAGACGTGTGCTCTTCCGATCTGCTTTTATGTTCAGCCCCATCCT	39940069	39940118	39940008	39940030	39940138	39940160	39940008	39940160	116_40	40
X_150974561_150974610	28925	2	25	AC	X	50	CTACACGACGCTCTTCCGATCTAATCTCTGTGCTTGGGTTCATGT	CAGACGTGTGCTCTTCCGATCTTTGCTATGGATTTGCCAGTCCTC	150974561	150974610	150974472	150974494	150974648	150974670	150974472	150974670	116_40	40
X_85880213_85880262	28926	2	25	AC	X	50	CTACACGACGCTCTTCCGATCTACTGTGACAGAATTCAGGAAACCA	CAGACGTGTGCTCTTCCGATCTGAGGAAAGAGAAACCCACCCCTA	85880213	85880262	85880126	85880149	85880263	85880285	85880126	85880285	116_40	40
X_22436859_22436908	28927	2	25	AC	X	50	CTACACGACGCTCTTCCGATCTAGCACAGTACAAGGAACTCCCAT	CAGACGTGTGCTCTTCCGATCTCCATGGATATGAAGGCCCAACTC	22436859	22436908	22436780	22436802	22436911	22436933	22436780	22436933	116_40	40
X_118120015_118120064	28928	2	25	AC	X	50	CTACACGACGCTCTTCCGATCTAGCACTGGAGCAGGTTTTAGAAG	CAGACGTGTGCTCTTCCGATCTATGTAGCTTGCACCATTCACTGT	118120015	118120064	118119947	118119969	118120106	118120128	118119947	118120128	116_40	40
X_55042393_55042442	28929	2	25	AC	X	50	CTACACGACGCTCTTCCGATCTATCTCATCCCTGCCTTCTCTCTC	CAGACGTGTGCTCTTCCGATCTACAGAAAGACAAAGAGTCAAGCCT	55042393	55042442	55042354	55042376	55042487	55042510	55042354	55042510	116_40	40
X_5886499_5886548	28930	2	25	AC	X	50	CTACACGACGCTCTTCCGATCTATTAAAGGGCATGCTGTGGATGT	CAGACGTGTGCTCTTCCGATCTAGTAGATAGCACCCCAACACACA	5886499	5886548	5886358	5886380	5886543	5886565	5886358	5886565	116_40	40
X_95304188_95304237	28931	2	25	AC	X	50	CTACACGACGCTCTTCCGATCTATTTTGGCTATACACCTCTGGGC	CAGACGTGTGCTCTTCCGATCTACCCATAGCACTGGGAAAAACAA	95304188	95304237	95304160	95304182	95304261	95304283	95304160	95304283	116_40	40
X_119453148_119453197	28932	2	25	AC	X	50	CTACACGACGCTCTTCCGATCTCAGGACCCACCTACTTTGGTTTG	CAGACGTGTGCTCTTCCGATCTAAGACTGACAGAAGAGCTGTGTG	119453148	119453197	119453072	119453094	119453193	119453215	119453072	119453215	116_40	40
X_8064898_8064947	28933	2	25	AC	X	50	CTACACGACGCTCTTCCGATCTCCACCTTGTTATCTCCTCTTGGC	CAGACGTGTGCTCTTCCGATCTCCCTGAAGTTTGGGTGACAGATA	8064898	8064947	8064808	8064830	8064976	8064998	8064808	8064998	116_40	40
X_132461665_132461714	28934	2	25	AC	X	50	CTACACGACGCTCTTCCGATCTCCATGACTCACATTCTGTCCAGG	CAGACGTGTGCTCTTCCGATCTGCACCAACCTAGGCTCTTAAAGT	132461665	132461714	132461639	132461661	132461729	132461751	132461639	132461751	116_40	40
X_99568856_99568905	28937	2	25	AC	X	50	CTACACGACGCTCTTCCGATCTGAATTCAAAGAGCCCTCTGCTGT	CAGACGTGTGCTCTTCCGATCTACCATTCGCCAATGTCCTTGTTT	99568856	99568905	99568829	99568851	99568969	99568991	99568829	99568991	116_40	40
X_14622666_14622715	28938	2	25	AC	X	50	CTACACGACGCTCTTCCGATCTGACCAACCCCCAACATCCTAATG	CAGACGTGTGCTCTTCCGATCTGGGGAGAAAGGCAAGTTATTTGG	14622666	14622715	14622628	14622650	14622768	14622790	14622628	14622790	116_40	40
X_123559846_123559895	28939	2	25	AC	X	50	CTACACGACGCTCTTCCGATCTGATGGCAACAATGGGTATGGAGA	CAGACGTGTGCTCTTCCGATCTCTCCAGTGCCTAGCACATCTCTT	123559846	123559895	123559774	123559796	123559913	123559935	123559774	123559935	116_40	40
X_118751063_118751112	28940	2	25	AC	X	50	CTACACGACGCTCTTCCGATCTGCAGCTAGGGAAAGCAAACTTCT	CAGACGTGTGCTCTTCCGATCTTATTTTCCCAGACTGGAGTGGCT	118751063	118751112	118751010	118751032	118751121	118751143	118751010	118751143	116_40	40
X_5122810_5122859	28941	2	25	AC	X	50	CTACACGACGCTCTTCCGATCTGCATCACTACCACCTCACAGAAT	CAGACGTGTGCTCTTCCGATCTAAATGTTCTTACCACCCCTCTGC	5122810	5122859	5122784	5122806	5122861	5122883	5122784	5122883	116_40	40
X_105194520_105194569	28943	2	25	AC	X	50	CTACACGACGCTCTTCCGATCTGGAGAAAATAAAGGAAAAAGGCAGCA	CAGACGTGTGCTCTTCCGATCTTTGCTTTCTGAGATGGGACACAA	105194520	105194569	105194494	105194519	105194636	105194658	105194494	105194658	116_40	40
X_28849144_28849193	28945	2	25	AC	X	50	CTACACGACGCTCTTCCGATCTGTAATTCTCCCAACCTTTGCCCA	CAGACGTGTGCTCTTCCGATCTTGGAAGAAAAGGCTAAGGCAGAG	28849144	28849193	28849082	28849104	28849237	28849259	28849082	28849259	116_40	40
X_69130222_69130271	28946	2	25	AC	X	50	CTACACGACGCTCTTCCGATCTTATCTGGGGCTATAGGCACACTC	CAGACGTGTGCTCTTCCGATCTACCCCTAGGAAGACTGAAACACA	69130222	69130271	69130107	69130129	69130267	69130289	69130107	69130289	116_40	40
X_5409890_5409939	28947	2	25	AC	X	50	CTACACGACGCTCTTCCGATCTTATTCAGTACTGCGAACGGTGAG	CAGACGTGTGCTCTTCCGATCTCTAGGCAGACTACACTCCCTCTT	5409890	5409939	5409846	5409868	5409960	5409982	5409846	5409982	116_40	40
X_126079938_126079987	28948	2	25	AC	X	50	CTACACGACGCTCTTCCGATCTTCCTAAGGTGTTTGTTGGTGGTG	CAGACGTGTGCTCTTCCGATCTGCATTGACCCAGCCAATACAAAG	126079938	126079987	126079887	126079909	126079996	126080018	126079887	126080018	116_40	40
X_41569335_41569384	28949	2	25	AC	X	50	CTACACGACGCTCTTCCGATCTTCTCACTGCAATCCAAGTCACTG	CAGACGTGTGCTCTTCCGATCTCTGTTCCATTGTATCACCCCAGG	41569335	41569384	41569293	41569315	41569392	41569414	41569293	41569414	116_40	40
X_27587064_27587113	28950	2	25	AC	X	50	CTACACGACGCTCTTCCGATCTTCTTTATCATAGCTCCCCAAGCCT	CAGACGTGTGCTCTTCCGATCTAGGAAGCAAACTCTTCTCACAGC	27587064	27587113	27587029	27587052	27587134	27587156	27587029	27587156	116_40	40
X_79082366_79082415	28951	2	25	AC	X	50	CTACACGACGCTCTTCCGATCTTGGTCAAATCCAAAAGGGGAAAGT	CAGACGTGTGCTCTTCCGATCTGTTTTGCTGTTTGTTCCTGCCTT	79082366	79082415	79082336	79082359	79082420	79082442	79082336	79082442	116_40	40
X_100734293_100734342	28952	2	25	AC	X	50	CTACACGACGCTCTTCCGATCTTGTACAAAAAGCCACATTCACAA	CAGACGTGTGCTCTTCCGATCTCATCCTCTTTTGTGCTCTTCAGG	100734293	100734342	100734201	100734223	100734360	100734382	100734201	100734382	116_40	40
X_85613435_85613484	28953	2	25	AC	X	50	CTACACGACGCTCTTCCGATCTTTCCAAATTATGCCATCCCAGCC	CAGACGTGTGCTCTTCCGATCTCATCACTCCATAATTGCTGCCCA	85613435	85613484	85613408	85613430	85613499	85613521	85613408	85613521	116_40	40
X_37996624_37996673	28954	2	25	AC	X	50	CTACACGACGCTCTTCCGATCTTTTCTCGGCATACACACATGCTT	CAGACGTGTGCTCTTCCGATCTAGTCAAATTACCTGGCTGAGGGA	37996624	37996673	37996586	37996608	37996701	37996723	37996586	37996723	116_40	40
X_34129714_34129763	29580	2	25	AT	X	50	CTACACGACGCTCTTCCGATCTTCTCCTTCCTCTTAACCTCCACT	CAGACGTGTGCTCTTCCGATCTGGAAGCAGGAAGAAAATTTGCCA	34129714	34129763	34129691	34129713	34129870	34129892	34129691	34129892	121_40	40
Y_23773324_23773371	49706	2	24	AC	Y	48	CTACACGACGCTCTTCCGATCTGAAGCATGCTGCTTAGACTTCCA	CAGACGTGTGCTCTTCCGATCTTGAAATCCAGTCCAGTCTGGGAA	23773324	23773371	23773242	23773264	23773406	23773428	23773242	23773428	140_43	43
5_122424773_122424820	63438	2	24	AG	5	48	CTACACGACGCTCTTCCGATCTAGAACTTCCTTCTTCCCTCTCCC	CAGACGTGTGCTCTTCCGATCTGTGGGTTTTACGACAGCACAAAA	122424773	122424820	122424712	122424734	122424895	122424917	122424712	122424917	140_43	43
Y_18639019_18639066	45885	2	24	AC	Y	48	CTACACGACGCTCTTCCGATCTGGAAGGAGAAGTGTATCCCACCT	CAGACGTGTGCTCTTCCGATCTAGGGCCCAGCTAGAAAAACAAAA	18639019	18639066	18638976	18638998	18639098	18639120	18638976	18639120	143_43	43
X_32849767_32849814	28962	2	24	AC	X	48	CTACACGACGCTCTTCCGATCTAATGGAAGTTCTTAGGGCAGAGC	CAGACGTGTGCTCTTCCGATCTTGTCAGAACTTTGTCACCTGTCT	32849767	32849814	32849679	32849701	32849846	32849868	32849679	32849868	145_42	42
X_127732554_127732601	28968	2	24	AC	X	48	CTACACGACGCTCTTCCGATCTAGCAAGCTACCATAAATTGGGGA	CAGACGTGTGCTCTTCCGATCTCATCCTGGTGGGTACAGAGTTTG	127732554	127732601	127732472	127732494	127732670	127732692	127732472	127732692	145_42	42
X_138368138_138368185	28981	2	24	AC	X	48	CTACACGACGCTCTTCCGATCTATTGGCTACCACTGCTCTTGAAC	CAGACGTGTGCTCTTCCGATCTGCTAATATGGAAGCCCTGCACAA	138368138	138368185	138368115	138368137	138368248	138368270	138368115	138368270	145_42	42
X_18527318_18527365	28982	2	24	AC	X	48	CTACACGACGCTCTTCCGATCTCACACAGGTTGCAGTGAGTGAG	CAGACGTGTGCTCTTCCGATCTGAATGCAGAGTTTGCTTGACAGG	18527318	18527365	18527243	18527264	18527368	18527390	18527243	18527390	145_42	42
X_102259841_102259888	28987	2	24	AC	X	48	CTACACGACGCTCTTCCGATCTCCTCAGCTAACCATGCCTTCAAA	CAGACGTGTGCTCTTCCGATCTAGGCCACTCACATCACACAATAC	102259841	102259888	102259755	102259777	102259951	102259973	102259755	102259973	145_42	42
X_39214883_39214930	28971	2	24	AC	X	48	CTACACGACGCTCTTCCGATCTAGGAGAGATCCAAGGGAAAAGGT	CAGACGTGTGCTCTTCCGATCTAGTTTTCTTCCCAGGAAACCCAG	39214883	39214930	39214822	39214844	39215001	39215023	39214822	39215023	146_42	42
X_9499395_9499442	28972	2	24	AC	X	48	CTACACGACGCTCTTCCGATCTAGGATGAACTTTGCATGCTTCAGA	CAGACGTGTGCTCTTCCGATCTGCTTTACAAACCAGAAATGAGCGA	9499395	9499442	9499316	9499339	9499516	9499539	9499316	9499539	146_42	42
X_104388778_104388825	28973	2	24	AC	X	48	CTACACGACGCTCTTCCGATCTAGGTCTCCTAGTGTACATCCTGT	CAGACGTGTGCTCTTCCGATCTGGAGAAGGGAAATCAGCCAAGAG	104388778	104388825	104388715	104388737	104388897	104388919	104388715	104388919	146_42	42
X_141190866_141190913	28980	2	24	AC	X	48	CTACACGACGCTCTTCCGATCTATGTGCAACATAATTTGGAGTGACA	CAGACGTGTGCTCTTCCGATCTTATCACCTCCTCCAAACAGACAC	141190866	141190913	141190792	141190816	141190938	141190960	141190792	141190960	147_42	42
X_13849297_13849344	28993	2	24	AC	X	48	CTACACGACGCTCTTCCGATCTCTATAGTACAAGGCAGGCACAGG	CAGACGTGTGCTCTTCCGATCTTAAACCAGTTTCCATGTGGGTCC	13849297	13849344	13849227	13849249	13849357	13849379	13849227	13849379	147_42	42
X_119807854_119807901	28983	2	24	AC	X	48	CTACACGACGCTCTTCCGATCTCAGCAGTGAGCTCTTATCCACAG	CAGACGTGTGCTCTTCCGATCTTCTGTACTAGACTGCACACCAGC	119807854	119807901	119807815	119807837	119807928	119807950	119807815	119807950	148_42	42
X_138195134_138195181	28985	2	24	AC	X	48	CTACACGACGCTCTTCCGATCTCCATTAGAATGCATCTCCAGGACC	CAGACGTGTGCTCTTCCGATCTTGGCACTACTCAAAAAGCCACTT	138195134	138195181	138195045	138195068	138195221	138195243	138195045	138195243	148_42	42
X_17559890_17559937	28990	2	24	AC	X	48	CTACACGACGCTCTTCCGATCTCCTGCAGCTCATCTTTGGACTAT	CAGACGTGTGCTCTTCCGATCTTCTTGTACCCATCAGTCTTTGGC	17559890	17559937	17559815	17559837	17559942	17559964	17559815	17559964	148_42	42
X_133703770_133703817	28991	2	24	AC	X	48	CTACACGACGCTCTTCCGATCTCCTTCTCCTGCTACCTGCAATTC	CAGACGTGTGCTCTTCCGATCTATAATAACCGTCCCCCAACACAC	133703770	133703817	133703729	133703751	133703834	133703856	133703729	133703856	148_42	42
X_6013144_6013191	28956	2	24	AC	X	48	CTACACGACGCTCTTCCGATCTAAAGAGTTCCATGTGTACGAGCC	CAGACGTGTGCTCTTCCGATCTAAAGCTGGAATTCAGAGCGCATA	6013144	6013191	6013069	6013091	6013221	6013243	6013069	6013243	149_42	42
X_65655713_65655760	28957	2	24	AC	X	48	CTACACGACGCTCTTCCGATCTAAAGGCTACAAGACACTCAGAGC	CAGACGTGTGCTCTTCCGATCTAGAGGCAAGCAAACTTCAACCAT	65655713	65655760	65655631	65655653	65655769	65655791	65655631	65655791	149_42	42
X_45012720_45012767	28959	2	24	AC	X	48	CTACACGACGCTCTTCCGATCTAAGACTCTGAGTGGGAGATGGAC	CAGACGTGTGCTCTTCCGATCTGCTGTTGTGCAATTGGGTCTATG	45012720	45012767	45012687	45012709	45012849	45012871	45012687	45012871	149_42	42
X_42377067_42377114	28974	2	24	AC	X	48	CTACACGACGCTCTTCCGATCTAGTATGTGCGCTCCTTACGTTTT	CAGACGTGTGCTCTTCCGATCTCACTTGAGTACGAAGATCGTCCC	42377067	42377114	42377003	42377025	42377144	42377166	42377003	42377166	149_42	42
X_103836827_103836874	28992	2	24	AC	X	48	CTACACGACGCTCTTCCGATCTCCTTTTGTGGCTTAGAAGATGCC	CAGACGTGTGCTCTTCCGATCTTGAATACCTCTGCCCCACTTCAT	103836827	103836874	103836778	103836800	103836887	103836909	103836778	103836909	149_42	42
X_49138907_49138954	28960	2	24	AC	X	48	CTACACGACGCTCTTCCGATCTAAGGAATAGGGAGTGGGTGAGAG	CAGACGTGTGCTCTTCCGATCTACCCAATCTAAAGTTGCAACCGA	49138907	49138954	49138880	49138902	49138968	49138990	49138880	49138990	150_42	42
X_33237424_33237471	28965	2	24	AC	X	48	CTACACGACGCTCTTCCGATCTAGAGGTAGAAGTGTGCTGCCTTA	CAGACGTGTGCTCTTCCGATCTAAATGAACTCACAAGGTTCCAGA	33237424	33237471	33237337	33237359	33237532	33237554	33237337	33237554	150_42	42
X_80669706_80669753	28967	2	24	AC	X	48	CTACACGACGCTCTTCCGATCTAGATGTTGGGTAACTGAATGAGAGA	CAGACGTGTGCTCTTCCGATCTTTTGCTTTAAGGGAAGTCTGCCA	80669706	80669753	80669624	80669648	80669785	80669807	80669624	80669807	150_42	42
X_92775677_92775724	28986	2	24	AC	X	48	CTACACGACGCTCTTCCGATCTCCCCGTGGAGCTGAATTAAAGAA	CAGACGTGTGCTCTTCCGATCTTTTCTTTGCACTACGGTCTCTCC	92775677	92775724	92775598	92775620	92775799	92775821	92775598	92775821	150_42	42
X_41677399_41677446	28958	2	24	AC	X	48	CTACACGACGCTCTTCCGATCTAACATAGTGCCATGCAAGGTGAG	CAGACGTGTGCTCTTCCGATCTGCACTTTTCTAGGTCCTTTTCGT	41677399	41677446	41677328	41677350	41677482	41677504	41677328	41677504	151_42	42
X_106618481_106618528	28978	2	24	AC	X	48	CTACACGACGCTCTTCCGATCTATCTGGTATGGAGAGTGGATGGG	CAGACGTGTGCTCTTCCGATCTGCCCAGGGTCAAAATCAAACCAT	106618481	106618528	106618400	106618422	106618559	106618581	106618400	106618581	151_42	42
X_128764971_128765018	28989	2	24	AC	X	48	CTACACGACGCTCTTCCGATCTCCTCTTGCTTCCCCCTTCATTTT	CAGACGTGTGCTCTTCCGATCTCTCGGGGCCAGTTTCCTTATCTA	128764971	128765018	128764912	128764934	128765075	128765097	128764912	128765097	151_42	42
X_48577271_48577318	28961	2	24	AC	X	48	CTACACGACGCTCTTCCGATCTAATGCACCCCCAACAGATCAAAT	CAGACGTGTGCTCTTCCGATCTACCTGGTAGTGGGTTTATGTCTGA	48577271	48577318	48577231	48577253	48577336	48577359	48577231	48577359	152_42	42
X_42043039_42043086	28970	2	24	AC	X	48	CTACACGACGCTCTTCCGATCTAGGACCCACACTTTTGGGAGTAT	CAGACGTGTGCTCTTCCGATCTATATCTGCCCAGTGCCATCTTCT	42043039	42043086	42042953	42042975	42043096	42043118	42042953	42043118	152_42	42
X_39540177_39540224	28988	2	24	AC	X	48	CTACACGACGCTCTTCCGATCTCCTCCCCAATTCCTAACCTCTCT	CAGACGTGTGCTCTTCCGATCTTCAGGTTGATTTTGTGCCTGGTT	39540177	39540224	39540129	39540151	39540264	39540286	39540129	39540286	152_42	42
X_141976329_141976376	28994	2	24	AC	X	48	CTACACGACGCTCTTCCGATCTCTCAAGAAACCATGAGGGACTGG	CAGACGTGTGCTCTTCCGATCTTCCTGAGTTGGATTCAGATTAAAAACA	141976329	141976376	141976241	141976263	141976426	141976452	141976241	141976452	152_42	42
X_137831485_137831532	28963	2	24	AC	X	48	CTACACGACGCTCTTCCGATCTACAAAGCCTCTGGCCTAAATGAG	CAGACGTGTGCTCTTCCGATCTTACAATGCCTGTGCCACATTTCT	137831485	137831532	137831432	137831454	137831572	137831594	137831432	137831594	153_42	42
X_122494707_122494754	28977	2	24	AC	X	48	CTACACGACGCTCTTCCGATCTATCACTCCCTGCTGTCTAACCAT	CAGACGTGTGCTCTTCCGATCTGGATGAGGAGGGAGAGAGAAGAC	122494707	122494754	122494650	122494672	122494783	122494805	122494650	122494805	153_42	42
X_121443946_121443993	28984	2	24	AC	X	48	CTACACGACGCTCTTCCGATCTCATTGCCACCCTTCCAGAAGTC	CAGACGTGTGCTCTTCCGATCTGAGGTTTCCAGACTGATTTGCCT	121443946	121443993	121443854	121443875	121444004	121444026	121443854	121444026	153_42	42
X_21057563_21057610	29074	2	24	AG	X	48	CTACACGACGCTCTTCCGATCTGCCAGAATCCATGCCTGCTATAA	CAGACGTGTGCTCTTCCGATCTACTGGGAAAGAAAACTCTCTATGTGG	21057563	21057610	21057490	21057512	21057622	21057647	21057490	21057647	153_42	42
X_11843310_11843357	28966	2	24	AC	X	48	CTACACGACGCTCTTCCGATCTAGATGTGGTTTTTGGCATCCTGA	CAGACGTGTGCTCTTCCGATCTGAGTTCACACAAGCCGTTCACTA	11843310	11843357	11843267	11843289	11843400	11843422	11843267	11843422	154_42	42
X_36703762_36703809	28979	2	24	AC	X	48	CTACACGACGCTCTTCCGATCTATGGAGTTAGAGAGAGGGGCTTC	CAGACGTGTGCTCTTCCGATCTCCATCTAGCCTAGCCCCCATTTA	36703762	36703809	36703676	36703698	36703818	36703840	36703676	36703840	154_42	42
X_102532458_102532505	28969	2	24	AC	X	48	CTACACGACGCTCTTCCGATCTAGGAATTCAATTGGCAACAAGCA	CAGACGTGTGCTCTTCCGATCTGCACTCAGTAATCGTTTGGGAAC	102532458	102532505	102532382	102532404	102532513	102532535	102532382	102532535	155_42	42
X_117125810_117125857	29442	2	24	AG	X	48	CTACACGACGCTCTTCCGATCTAGGGAGGTGGAGAAGAAAGGAAA	CAGACGTGTGCTCTTCCGATCTGGTACAGAGCAAACAATGTGGGA	117125810	117125857	117125726	117125748	117125874	117125896	117125726	117125896	97_40	40
X_23184515_23184562	29443	2	24	AG	X	48	CTACACGACGCTCTTCCGATCTATTTGCTTGAGACTGGCCTCTTT	CAGACGTGTGCTCTTCCGATCTTAGATATACCCACTCACCCCACC	23184515	23184562	23184468	23184490	23184604	23184626	23184468	23184626	97_40	40
X_11371670_11371717	29015	2	24	AC	X	48	CTACACGACGCTCTTCCGATCTTGAGCTATTTGCTAGGGTGTCCT	CAGACGTGTGCTCTTCCGATCTCTCTCAAGAAATAGGTGTGGCCC	11371670	11371717	11371602	11371624	11371757	11371779	11371602	11371779	113_40	40
X_139236727_139236774	29016	2	24	AC	X	48	CTACACGACGCTCTTCCGATCTTGCTGCTCCCATCCACTAATACT	CAGACGTGTGCTCTTCCGATCTCAGTGTGTAAGTCTTTTACCTGTGC	139236727	139236774	139236660	139236682	139236801	139236825	139236660	139236825	113_40	40
X_16980400_16980447	28975	2	24	AC	X	48	CTACACGACGCTCTTCCGATCTAGTGACTGTTGATGGATGAGTGG	CAGACGTGTGCTCTTCCGATCTGCATAAGTTCATCCATGTTGTCAC	16980400	16980447	16980359	16980381	16980495	16980518	16980359	16980518	114_40	40
X_10252494_10252541	28976	2	24	AC	X	48	CTACACGACGCTCTTCCGATCTAGTGCATTGACAAGACCAGGAAA	CAGACGTGTGCTCTTCCGATCTTCACTCGAATCTACACGGGATGA	10252494	10252541	10252445	10252467	10252556	10252578	10252445	10252578	114_40	40
X_106703115_106703162	28995	2	24	AC	X	48	CTACACGACGCTCTTCCGATCTCTGATCCAAACCCACTGGGAAAA	CAGACGTGTGCTCTTCCGATCTAATCTTTAGCAGGGAAGTGCTGG	106703115	106703162	106703023	106703045	106703190	106703212	106703023	106703212	114_40	40
X_132664909_132664956	28996	2	24	AC	X	48	CTACACGACGCTCTTCCGATCTCTTCCAAAAATGCTGTGGCCTTG	CAGACGTGTGCTCTTCCGATCTATGGATTGAGCCAGATGCCATAC	132664909	132664956	132664856	132664878	132664960	132664982	132664856	132664982	114_40	40
X_41713478_41713525	28997	2	24	AC	X	48	CTACACGACGCTCTTCCGATCTGACCCAGACCTCACAGTTGAATC	CAGACGTGTGCTCTTCCGATCTATAACTGGTAACCACAGGGAACC	41713478	41713525	41713389	41713411	41713527	41713549	41713389	41713549	114_40	40
X_141219106_141219153	28998	2	24	AC	X	48	CTACACGACGCTCTTCCGATCTGATAAACACCTCTGCTCCCTCCA	CAGACGTGTGCTCTTCCGATCTTGGATTGTGGTCATGGTTACACAG	141219106	141219153	141219037	141219059	141219219	141219242	141219037	141219242	114_40	40
X_151733528_151733575	28999	2	24	AC	X	48	CTACACGACGCTCTTCCGATCTGATCTCAACACTCACCTGAACCC	CAGACGTGTGCTCTTCCGATCTAAATAGATGTGTGAGCTGGTGCC	151733528	151733575	151733466	151733488	151733649	151733671	151733466	151733671	114_40	40
X_108989031_108989078	29000	2	24	AC	X	48	CTACACGACGCTCTTCCGATCTGCAGCAGATAAAAGGGATTGGTG	CAGACGTGTGCTCTTCCGATCTATTTCTGACAACCAAAGGGAAGT	108989031	108989078	108988997	108989019	108989113	108989135	108988997	108989135	114_40	40
X_31840771_31840818	29001	2	24	AC	X	48	CTACACGACGCTCTTCCGATCTGCTAACATGGTAACTGGAGTGGG	CAGACGTGTGCTCTTCCGATCTCTCTTCGTCGTTTACCAGCTCAA	31840771	31840818	31840698	31840720	31840847	31840869	31840698	31840869	114_40	40
X_16280993_16281040	29002	2	24	AC	X	48	CTACACGACGCTCTTCCGATCTGCTGAAAAGGAGGATGGAGAAACT	CAGACGTGTGCTCTTCCGATCTACCTATAAGACGGTGTGCTAATTGT	16280993	16281040	16280897	16280920	16281107	16281131	16280897	16281131	114_40	40
X_96529006_96529053	29003	2	24	AC	X	48	CTACACGACGCTCTTCCGATCTGGCAGAAGTAGAAGTGGTCATCA	CAGACGTGTGCTCTTCCGATCTCGGATTCCAGTCTGTCTCTCTCT	96529006	96529053	96528914	96528936	96529058	96529080	96528914	96529080	114_40	40
X_69686098_69686145	29004	2	24	AC	X	48	CTACACGACGCTCTTCCGATCTGGGTTGAACATTTGTGTGCAAGT	CAGACGTGTGCTCTTCCGATCTAGGGAAATGGGGAAAGGGTATGA	69686098	69686145	69686061	69686083	69686156	69686178	69686061	69686178	114_40	40
X_69149557_69149604	29005	2	24	AC	X	48	CTACACGACGCTCTTCCGATCTGTCTGCCAAAGTCCAGGATGAAT	CAGACGTGTGCTCTTCCGATCTAGGGACAGGCTTAAGTCCTAACAT	69149557	69149604	69149474	69149496	69149648	69149671	69149474	69149671	114_40	40
X_136535932_136535979	29006	2	24	AC	X	48	CTACACGACGCTCTTCCGATCTGTGAGAAGAGTTTTCTTGGGGCA	CAGACGTGTGCTCTTCCGATCTTTCAATCTTCCAGGGTGTGTGTG	136535932	136535979	136535856	136535878	136535982	136536004	136535856	136536004	114_40	40
X_46867210_46867257	29007	2	24	AC	X	48	CTACACGACGCTCTTCCGATCTGTTAGGACTTCAGCGTGTCCTTT	CAGACGTGTGCTCTTCCGATCTGGTAGTTTGTTCAGGGAACCTCC	46867210	46867257	46867182	46867204	46867302	46867324	46867182	46867324	114_40	40
X_84672913_84672960	29008	2	24	AC	X	48	CTACACGACGCTCTTCCGATCTGTTCTCTCTCCTGACTTTTCCCC	CAGACGTGTGCTCTTCCGATCTGGTGGAGGCTATGAGGGTACTTA	84672913	84672960	84672882	84672904	84672984	84673006	84672882	84673006	114_40	40
X_18282552_18282599	29009	2	24	AC	X	48	CTACACGACGCTCTTCCGATCTGTTCTTGAGTTTCAATTTGGCTCCT	CAGACGTGTGCTCTTCCGATCTAGTGGCTATTCAACTGGTCTTCG	18282552	18282599	18282479	18282503	18282615	18282637	18282479	18282637	114_40	40
X_138012017_138012064	29010	2	24	AC	X	48	CTACACGACGCTCTTCCGATCTTACTCTAGAGCAACTGCAGTCCA	CAGACGTGTGCTCTTCCGATCTGGCCCCTTCCTTCCAAGATTTTA	138012017	138012064	138011955	138011977	138012083	138012105	138011955	138012105	114_40	40
X_56981907_56981954	29011	2	24	AC	X	48	CTACACGACGCTCTTCCGATCTTCACCAGACAGAATCACCTTCAG	CAGACGTGTGCTCTTCCGATCTAGTTGTTCTGTGGTCTTCCTTTT	56981907	56981954	56981884	56981906	56981965	56981987	56981884	56981987	114_40	40
X_134440215_134440262	29012	2	24	AC	X	48	CTACACGACGCTCTTCCGATCTTCAGGAAGACAGGACAACAGAGA	CAGACGTGTGCTCTTCCGATCTTGCATATGTGGGACTCAAAGAAA	134440215	134440262	134440187	134440209	134440316	134440338	134440187	134440338	114_40	40
X_128906003_128906050	29013	2	24	AC	X	48	CTACACGACGCTCTTCCGATCTTCCTGAATAGGAGCTCCATGACC	CAGACGTGTGCTCTTCCGATCTCTGGGTTGCTGTTGAAGTTTTCC	128906003	128906050	128905978	128906000	128906084	128906106	128905978	128906106	114_40	40
X_39516967_39517014	29014	2	24	AC	X	48	CTACACGACGCTCTTCCGATCTTCTGAAAGGCCACTATCCTGGAA	CAGACGTGTGCTCTTCCGATCTGCAATGCCTCCTCCTCATGTTAT	39516967	39517014	39516874	39516896	39517022	39517044	39516874	39517044	114_40	40
X_8778023_8778070	29017	2	24	AC	X	48	CTACACGACGCTCTTCCGATCTTGCTGCTGAGTATTTCTTGTGGG	CAGACGTGTGCTCTTCCGATCTGACCCTGCATTACTGTACCACTG	8778023	8778070	8777993	8778015	8778101	8778123	8777993	8778123	114_40	40
X_22131124_22131171	29018	2	24	AC	X	48	CTACACGACGCTCTTCCGATCTTGGGTTAAGATACAAAACAAGTAGGT	CAGACGTGTGCTCTTCCGATCTAAGCAGCTGGGCATCATCTTTTA	22131124	22131171	22131096	22131121	22131204	22131226	22131096	22131226	114_40	40
X_11545132_11545179	29019	2	24	AC	X	48	CTACACGACGCTCTTCCGATCTTGGTTGGAAAACACTAAAGGAGAA	CAGACGTGTGCTCTTCCGATCTACTCTGGAGCCTAGACACTTAAAC	11545132	11545179	11545076	11545099	11545238	11545261	11545076	11545261	114_40	40
X_80245320_80245367	29020	2	24	AC	X	48	CTACACGACGCTCTTCCGATCTTGTACCATCTGCTCTTTCATGGC	CAGACGTGTGCTCTTCCGATCTACCTGCTAAAAAGTTCTAGGAAGAAA	80245320	80245367	80245247	80245269	80245415	80245440	80245247	80245440	114_40	40
X_107553032_107553079	29021	2	24	AC	X	48	CTACACGACGCTCTTCCGATCTTGTAGGATGGCCATTAATCCTGG	CAGACGTGTGCTCTTCCGATCTGATGTGACACTCAGAGGAGATGC	107553032	107553079	107553007	107553029	107553130	107553152	107553007	107553152	114_40	40
X_68374653_68374700	29022	2	24	AC	X	48	CTACACGACGCTCTTCCGATCTTTACTAGATGTCACGTGGGAGGG	CAGACGTGTGCTCTTCCGATCTGAAGGCCTGGAGGTATGAAACAG	68374653	68374700	68374599	68374621	68374705	68374727	68374599	68374727	114_40	40
X_109917686_109917733	29023	2	24	AC	X	48	CTACACGACGCTCTTCCGATCTTTATGGAATCACTGCCACCTCTG	CAGACGTGTGCTCTTCCGATCTTTCTTGGGACAAGACTCTCACCA	109917686	109917733	109917623	109917645	109917805	109917827	109917623	109917827	114_40	40
X_127763455_127763502	29024	2	24	AC	X	48	CTACACGACGCTCTTCCGATCTTTCCCTACCCCAGGAATCTTCAG	CAGACGTGTGCTCTTCCGATCTTGAGCAAAGGAATGAATGAGGGG	127763455	127763502	127763380	127763402	127763573	127763595	127763380	127763595	114_40	40
X_70366023_70366070	29025	2	24	AC	X	48	CTACACGACGCTCTTCCGATCTTTGCTCCCCATTTCCTCATTTCC	CAGACGTGTGCTCTTCCGATCTTTTAAGAACTGGCTGAAGGGGTG	70366023	70366070	70365896	70365918	70366127	70366149	70365896	70366149	114_40	40
X_50448990_50449037	29026	2	24	AC	X	48	CTACACGACGCTCTTCCGATCTTTTCCCACAACCTCTCATCCTCT	CAGACGTGTGCTCTTCCGATCTGGCTTGACCTCTCTGAAGAACAG	50448990	50449037	50448967	50448989	50449053	50449075	50448967	50449075	114_40	40
X_133675567_133675614	29027	2	24	AC	X	48	CTACACGACGCTCTTCCGATCTTTTCTGTATCACCCATGACCCCT	CAGACGTGTGCTCTTCCGATCTCTGGAGGAAACCTGCAAAACAGA	133675567	133675614	133675490	133675512	133675683	133675705	133675490	133675705	114_40	40
X_64903255_64903302	28810	3	16	ACC	X	48	CTACACGACGCTCTTCCGATCTCGATCATAATGTTGGGGCATCCA	CAGACGTGTGCTCTTCCGATCTTCTGCAAAGATAAGCAGCTCTGG	64903255	64903302	64903191	64903213	64903321	64903343	64903191	64903343	148_42	42
X_31302675_31302722	28729	3	16	AAG	X	48	CTACACGACGCTCTTCCGATCTCACTGCCATGGTGAATGATCAGA	CAGACGTGTGCTCTTCCGATCTCTAGTCAAGGTAGCGAGACACCC	31302675	31302722	31302607	31302629	31302741	31302763	31302607	31302763	113_40	40
X_151573205_151573252	28753	3	16	AAT	X	48	CTACACGACGCTCTTCCGATCTCCAAACCCTTTCAACCAGGAGAA	CAGACGTGTGCTCTTCCGATCTTGCACTCTATGTGTTTTGTGGTCA	151573205	151573252	151573161	151573183	151573320	151573343	151573161	151573343	113_40	40
15_34978091_34978138	29947	3	16	AAC	15	48	CTACACGACGCTCTTCCGATCTTGGGGAGAAGTATGCTGTGGAAT	CAGACGTGTGCTCTTCCGATCTGGCAGGGTGATCGTGTCATATTT	34978091	34978138	34978006	34978028	34978185	34978207	34978006	34978207	118_40	40
Y_7128622_7128667	35680	2	23	AC	Y	46	CTACACGACGCTCTTCCGATCTTGCCTACATCACATGGTGTTCTG	CAGACGTGTGCTCTTCCGATCTAGTGAGGCATGATGGTAGGCTAT	7128622	7128667	7128598	7128620	7128716	7128738	7128598	7128738	137_43	43
X_149447785_149447830	29047	2	23	AC	X	46	CTACACGACGCTCTTCCGATCTAGTCAGACCCCTCCTTGTTGAAT	CAGACGTGTGCTCTTCCGATCTTTGCTCCTTGTCTTGAAGAGCTG	149447785	149447830	149447757	149447779	149447869	149447891	149447757	149447891	145_42	42
X_150123826_150123871	29056	2	23	AC	X	46	CTACACGACGCTCTTCCGATCTCAGGGGAGCAGTTAAGCCTAAAG	CAGACGTGTGCTCTTCCGATCTATTCAAGGCTGACAACAGAAGGG	150123826	150123871	150123743	150123765	150123915	150123937	150123743	150123937	145_42	42
X_26596468_26596513	29067	2	23	AC	X	46	CTACACGACGCTCTTCCGATCTCTGACTGCACCAAGGGTTATCAG	CAGACGTGTGCTCTTCCGATCTGGACCATTTTAGGGCTAGACAGC	26596468	26596513	26596392	26596414	26596579	26596601	26596392	26596601	145_42	42
X_53353091_53353136	29069	2	23	AC	X	46	CTACACGACGCTCTTCCGATCTCTTCCACAGGCTCTTGAACAGAA	CAGACGTGTGCTCTTCCGATCTTGCTCGCTAACACTTCTCATTGT	53353091	53353136	53353026	53353048	53353189	53353211	53353026	53353211	145_42	42
X_153311351_153311396	29042	2	23	AC	X	46	CTACACGACGCTCTTCCGATCTAGAATAGGCATCTGAGGACAGCC	CAGACGTGTGCTCTTCCGATCTTGTGCTTTGTGACATGATGGTGA	153311351	153311396	153311321	153311343	153311449	153311471	153311321	153311471	146_42	42
X_138497147_138497192	29057	2	23	AC	X	46	CTACACGACGCTCTTCCGATCTCAGTACACAGGTTGTAGCTGTTGA	CAGACGTGTGCTCTTCCGATCTCAAGAGAGTTAACTAGCCCTGCC	138497147	138497192	138497049	138497072	138497207	138497229	138497049	138497229	146_42	42
X_23758835_23758880	29072	2	23	AC	X	46	CTACACGACGCTCTTCCGATCTGAGTCCAGATAGAGCCCAGTTCT	CAGACGTGTGCTCTTCCGATCTACCCTGAGGTACTGAAGTGTTGA	23758835	23758880	23758792	23758814	23758924	23758946	23758792	23758946	146_42	42
X_66824041_66824086	29046	2	23	AC	X	46	CTACACGACGCTCTTCCGATCTAGGTCAGAAGCTGGGGAGAAATA	CAGACGTGTGCTCTTCCGATCTCCATCCTTAGTCCCAGAAATGGC	66824041	66824086	66824018	66824040	66824092	66824114	66824018	66824114	147_42	42
X_33001646_33001691	29064	2	23	AC	X	46	CTACACGACGCTCTTCCGATCTCCTACACCTGCACATGTGATGAA	CAGACGTGTGCTCTTCCGATCTATTCAGTTTCTCTCGGTGTTCCT	33001646	33001691	33001606	33001628	33001696	33001718	33001606	33001718	147_42	42
X_17313160_17313205	29041	2	23	AC	X	46	CTACACGACGCTCTTCCGATCTAGAAGCGCTTTAAGAACCCTCAC	CAGACGTGTGCTCTTCCGATCTCTTGGTCCACATCCTCCAAGAAC	17313160	17313205	17313135	17313157	17313250	17313272	17313135	17313272	148_42	42
X_118360217_118360262	29053	2	23	AC	X	46	CTACACGACGCTCTTCCGATCTATTTCTGCTTGGTGGGAAAGTGG	CAGACGTGTGCTCTTCCGATCTTCCCCTATTCCCTTGTGCTTGTA	118360217	118360262	118360143	118360165	118360276	118360298	118360143	118360298	148_42	42
X_23292950_23292995	29055	2	23	AC	X	46	CTACACGACGCTCTTCCGATCTCACCTGTTACCTATCTCGTTGGG	CAGACGTGTGCTCTTCCGATCTCAGAACAGCTTGGAATGGCTTTG	23292950	23292995	23292860	23292882	23293019	23293041	23292860	23293041	148_42	42
X_76622449_76622494	29058	2	23	AC	X	46	CTACACGACGCTCTTCCGATCTCATGGAGCCAATAGTGGAACCTC	CAGACGTGTGCTCTTCCGATCTCCAGGGCAGGTAAGTCAAACATT	76622449	76622494	76622308	76622330	76622546	76622568	76622308	76622568	148_42	42
X_51492211_51492256	29068	2	23	AC	X	46	CTACACGACGCTCTTCCGATCTCTGGTTACTTCCACAGAATGGGG	CAGACGTGTGCTCTTCCGATCTTCCCTTTCCCTTGCTGATTTTGG	51492211	51492256	51492140	51492162	51492268	51492290	51492140	51492290	148_42	42
X_99301673_99301718	29036	2	23	AC	X	46	CTACACGACGCTCTTCCGATCTACCATGAATCCAAGGTTTCTTTCTCT	CAGACGTGTGCTCTTCCGATCTTGTGTGTATCCATCCATCCTCCT	99301673	99301718	99301608	99301633	99301760	99301782	99301608	99301782	149_42	42
X_83604412_83604457	29039	2	23	AC	X	46	CTACACGACGCTCTTCCGATCTACTGACAACTTCTAGGCTCCTCA	CAGACGTGTGCTCTTCCGATCTAGCTCCTAACTCCCTTAATGCCT	83604412	83604457	83604315	83604337	83604471	83604493	83604315	83604493	149_42	42
X_116622897_116622942	29049	2	23	AC	X	46	CTACACGACGCTCTTCCGATCTAGTCTACGGTGTAATGTTTGGGT	CAGACGTGTGCTCTTCCGATCTTCCAAGACAGTAGACTTTGGGTG	116622897	116622942	116622799	116622821	116622950	116622972	116622799	116622972	149_42	42
X_146308308_146308353	29052	2	23	AC	X	46	CTACACGACGCTCTTCCGATCTATGCCACTGAATCACTTGAACCC	CAGACGTGTGCTCTTCCGATCTTCTACATGCTATCAAGGGCCAGA	146308308	146308353	146308169	146308191	146308409	146308431	146308169	146308431	149_42	42
X_154015377_154015422	29071	2	23	AC	X	46	CTACACGACGCTCTTCCGATCTGAAAATTCTCCTCTCCTGCTCCC	CAGACGTGTGCTCTTCCGATCTTGGGAAGTGCCATCATTTTCTAT	154015377	154015422	154015352	154015374	154015499	154015521	154015352	154015521	149_42	42
X_33874827_33874872	29073	2	23	AC	X	46	CTACACGACGCTCTTCCGATCTGATGAAGCAGGCAAAGGCAAAAT	CAGACGTGTGCTCTTCCGATCTGGAGTTACAAACCAGTGCTCCAT	33874827	33874872	33874729	33874751	33874890	33874912	33874729	33874912	149_42	42
X_133085075_133085120	29045	2	23	AC	X	46	CTACACGACGCTCTTCCGATCTAGGGTTGTCCTTCTGTCTATCCC	CAGACGTGTGCTCTTCCGATCTGAACAGAGGGTAGAAAATGGGGG	133085075	133085120	133085038	133085060	133085176	133085198	133085038	133085198	150_42	42
X_27506635_27506680	29063	2	23	AC	X	46	CTACACGACGCTCTTCCGATCTCCGTTGCACTTTCTTGATGTATGC	CAGACGTGTGCTCTTCCGATCTACCAAGTGGGAGGACAAATATGC	27506635	27506680	27506559	27506582	27506738	27506760	27506559	27506760	150_42	42
X_15568789_15568834	29054	2	23	AC	X	46	CTACACGACGCTCTTCCGATCTATTTGTGCCCTCACTGAACTCAA	CAGACGTGTGCTCTTCCGATCTAACTGCTTGGTGTTTTCAGTCCT	15568789	15568834	15568759	15568781	15568839	15568861	15568759	15568861	151_42	42
X_41746550_41746595	29061	2	23	AC	X	46	CTACACGACGCTCTTCCGATCTCCCCTCTAGCTTCTAAGAGGCATT	CAGACGTGTGCTCTTCCGATCTACCCAGTTTTATTTGCTTAGGTAGC	41746550	41746595	41746500	41746523	41746651	41746675	41746500	41746675	151_42	42
X_39397332_39397377	29066	2	23	AC	X	46	CTACACGACGCTCTTCCGATCTCTGACAGCATGTGCAAGCAAAG	CAGACGTGTGCTCTTCCGATCTGAGAGAGAGGAAGAGAGCTTGGA	39397332	39397377	39397285	39397306	39397395	39397417	39397285	39397417	151_42	42
X_144028597_144028642	29043	2	23	AC	X	46	CTACACGACGCTCTTCCGATCTAGGCAGGACTAAACAAATGCGAA	CAGACGTGTGCTCTTCCGATCTAGCTGGAATGATGATGCTGAGTG	144028597	144028642	144028541	144028563	144028709	144028731	144028541	144028731	152_42	42
X_17579696_17579741	29165	2	23	AC	X	46	CTACACGACGCTCTTCCGATCTGAGCCAAGAGGAGTCTACGTCTA	CAGACGTGTGCTCTTCCGATCTTTTCTAAAAGTGGGCACCAAGCA	17579696	17579741	17579600	17579622	17579810	17579832	17579600	17579832	152_42	42
X_151296671_151296716	29035	2	23	AC	X	46	CTACACGACGCTCTTCCGATCTACACCCCACGGTGATCAAAATAA	CAGACGTGTGCTCTTCCGATCTTTGAAGAGGATCCCACCTTCCTC	151296671	151296716	151296626	151296648	151296769	151296791	151296626	151296791	153_42	42
X_146191418_146191463	29037	2	23	AC	X	46	CTACACGACGCTCTTCCGATCTACGATAAAAGAAACACCCCACCC	CAGACGTGTGCTCTTCCGATCTCTTGTGCTGAGTCTTTCTCGTCA	146191418	146191463	146191395	146191417	146191504	146191526	146191395	146191526	153_42	42
X_45612190_45612235	29044	2	23	AC	X	46	CTACACGACGCTCTTCCGATCTAGGGCTAAATGTATTTCCCGCAG	CAGACGTGTGCTCTTCCGATCTTCATCCTGTTCCTCTTTGCTGAA	45612190	45612235	45612138	45612160	45612236	45612258	45612138	45612258	153_42	42
X_30984931_30984976	29050	2	23	AC	X	46	CTACACGACGCTCTTCCGATCTATAGGAACCCGGCATTCAGAAGA	CAGACGTGTGCTCTTCCGATCTTGTTGTCTGTGTACTCATAATTGCCA	30984931	30984976	30984862	30984884	30985010	30985035	30984862	30985035	153_42	42
X_142793166_142793211	29051	2	23	AC	X	46	CTACACGACGCTCTTCCGATCTATGCACTCTCACGTTCATTACAG	CAGACGTGTGCTCTTCCGATCTACTTGTTCATCCGTATTGTGGCA	142793166	142793211	142793071	142793093	142793275	142793297	142793071	142793297	153_42	42
X_111087102_111087147	29065	2	23	AC	X	46	CTACACGACGCTCTTCCGATCTCTGAACCAAGACAGTGGGATGAG	CAGACGTGTGCTCTTCCGATCTATGGGACTCTTACACCTTCCCTC	111087102	111087147	111087080	111087102	111087264	111087286	111087080	111087286	153_42	42
X_13179566_13179611	29038	2	23	AC	X	46	CTACACGACGCTCTTCCGATCTACTCCAAGCGCTTTTACTTTTCC	CAGACGTGTGCTCTTCCGATCTGCTGATCTGCTCCTTGATGTGTA	13179566	13179611	13179504	13179526	13179638	13179660	13179504	13179660	154_42	42
X_29246296_29246341	29040	2	23	AC	X	46	CTACACGACGCTCTTCCGATCTAGAAACTTTCCACGTGCCTTCTT	CAGACGTGTGCTCTTCCGATCTGAAGAAAAGTAAGGATGCCATTCCA	29246296	29246341	29246248	29246270	29246371	29246395	29246248	29246395	154_42	42
X_29024765_29024810	29062	2	23	AC	X	46	CTACACGACGCTCTTCCGATCTCCCTCAATCTCTGGGTTCTGGTA	CAGACGTGTGCTCTTCCGATCTACAAACAGCATACTTGAGTTGGGA	29024765	29024810	29024689	29024711	29024832	29024855	29024689	29024855	154_42	42
X_79421485_79421530	29048	2	23	AC	X	46	CTACACGACGCTCTTCCGATCTAGTCAGTAACCCTGATAGCATGT	CAGACGTGTGCTCTTCCGATCTCCATAATCATGAGAGCCAGGTCC	79421485	79421530	79421392	79421414	79421562	79421584	79421392	79421584	155_42	42
X_17974034_17974079	29060	2	23	AC	X	46	CTACACGACGCTCTTCCGATCTCCCACACTCCCTTAGGAATCTCT	CAGACGTGTGCTCTTCCGATCTAAAGGTAGAGCCATACCTCCGAA	17974034	17974079	17973992	17974014	17974121	17974143	17973992	17974143	155_42	42
X_7356560_7356605	29070	2	23	AC	X	46	CTACACGACGCTCTTCCGATCTCTTTAAGTGCCTCTCTGTGACCC	CAGACGTGTGCTCTTCCGATCTCTAGGGACCCGTAAAACTGCATC	7356560	7356605	7356488	7356510	7356659	7356681	7356488	7356681	155_42	42
X_34400495_34400540	29059	2	23	AC	X	46	CTACACGACGCTCTTCCGATCTCCACGTGCATATAGAGGAAAGAGT	CAGACGTGTGCTCTTCCGATCTCAAAGAACACCCTTCCCCTTCTC	34400495	34400540	34400436	34400459	34400552	34400574	34400436	34400574	156_42	11
X_31741741_31741786	29075	2	23	AC	X	46	CTACACGACGCTCTTCCGATCTGCTCTCTTGCCTTCTAACTGGTC	CAGACGTGTGCTCTTCCGATCTAAGCTGGAGAGGGAAGGGTATTT	31741741	31741786	31741685	31741707	31741860	31741882	31741685	31741882	82_40	40
X_128868823_128868868	29076	2	23	AC	X	46	CTACACGACGCTCTTCCGATCTGGCCTCATAGCACCAAAGATCAA	CAGACGTGTGCTCTTCCGATCTTGATACAAAGCTACCCTGCCTCT	128868823	128868868	128868755	128868777	128868869	128868891	128868755	128868891	82_40	40
X_95693537_95693582	29077	2	23	AC	X	46	CTACACGACGCTCTTCCGATCTGGTAAGTAGAGAGGCGGAGTCAT	CAGACGTGTGCTCTTCCGATCTAATAAGAGAGGGTCCTTCTGGCA	95693537	95693582	95693458	95693480	95693654	95693676	95693458	95693676	82_40	40
X_39598688_39598733	29078	2	23	AC	X	46	CTACACGACGCTCTTCCGATCTGGTAGTGGATTCCTCTGCAACTG	CAGACGTGTGCTCTTCCGATCTTTCTAGTGCCAAAATGCTGTGGT	39598688	39598733	39598591	39598613	39598790	39598812	39598591	39598812	82_40	40
X_137900662_137900707	29079	2	23	AC	X	46	CTACACGACGCTCTTCCGATCTGGTCCTGGCACCTCCTAATCATA	CAGACGTGTGCTCTTCCGATCTTCTCTGAGCCTTAATTCTCATCTGT	137900662	137900707	137900582	137900604	137900759	137900783	137900582	137900783	82_40	40
X_112048599_112048644	29080	2	23	AC	X	46	CTACACGACGCTCTTCCGATCTGGTTGTTGAGCAGAAGCAATGAG	CAGACGTGTGCTCTTCCGATCTGAGCCTACCTTTTCTTCTGAGGG	112048599	112048644	112048527	112048549	112048649	112048671	112048527	112048671	82_40	40
X_133413832_133413877	29081	2	23	AC	X	46	CTACACGACGCTCTTCCGATCTGTATCAGTTCTTTCCAACCCAATTT	CAGACGTGTGCTCTTCCGATCTGAAATACTGTGCTCATGTGTTGG	133413832	133413877	133413747	133413771	133413903	133413925	133413747	133413925	82_40	40
X_25860832_25860877	29082	2	23	AC	X	46	CTACACGACGCTCTTCCGATCTGTCAGGAGCATTACCCTGATACC	CAGACGTGTGCTCTTCCGATCTTATTACATATCGGCCTGCAGTGG	25860832	25860877	25860795	25860817	25860879	25860901	25860795	25860901	82_40	40
X_146007979_146008024	29083	2	23	AC	X	46	CTACACGACGCTCTTCCGATCTGTCCCTCAATTTCTTACGCTGGA	CAGACGTGTGCTCTTCCGATCTACAAGCACAATAGAAGCAGGTGA	146007979	146008024	146007946	146007968	146008081	146008103	146007946	146008103	82_40	40
X_5179630_5179675	29084	2	23	AC	X	46	CTACACGACGCTCTTCCGATCTGTTATTCCATCCATTGCCAAGCA	CAGACGTGTGCTCTTCCGATCTTGTCCCAAAAATGTATCATGCAA	5179630	5179675	5179603	5179625	5179714	5179736	5179603	5179736	82_40	40
X_151140340_151140385	29085	2	23	AC	X	46	CTACACGACGCTCTTCCGATCTGTTTCCTTTGGGGAGGAAAGTGT	CAGACGTGTGCTCTTCCGATCTGCTTTTCACAAGTAAACAGGCCC	151140340	151140385	151140253	151140275	151140434	151140456	151140253	151140456	82_40	40
X_87274046_87274091	29086	2	23	AC	X	46	CTACACGACGCTCTTCCGATCTTACAAATTCCAGGAGCCACACTT	CAGACGTGTGCTCTTCCGATCTCCTAGTTTTAGAAGTTTCAATAGCAGT	87274046	87274091	87273998	87274020	87274110	87274136	87273998	87274136	82_40	40
X_53569807_53569852	29087	2	23	AC	X	46	CTACACGACGCTCTTCCGATCTTACAATCCAGACCTGTGACCAGT	CAGACGTGTGCTCTTCCGATCTCAAAGAGCAGACCTACCTTCCAC	53569807	53569852	53569742	53569764	53569871	53569893	53569742	53569893	82_40	40
X_101132670_101132715	29088	2	23	AC	X	46	CTACACGACGCTCTTCCGATCTTACACTCAGATGGGCTGTTCTCT	CAGACGTGTGCTCTTCCGATCTGGTGTGATTGGGCTCAAAGGTTA	101132670	101132715	101132596	101132618	101132771	101132793	101132596	101132793	82_40	40
X_113501740_113501785	29089	2	23	AC	X	46	CTACACGACGCTCTTCCGATCTTCAACAATTCTGGTGGCTACAGG	CAGACGTGTGCTCTTCCGATCTCAGCAGTTTGACAATGATGTGGT	113501740	113501785	113501683	113501705	113501816	113501838	113501683	113501838	82_40	40
X_7607414_7607459	29090	2	23	AC	X	46	CTACACGACGCTCTTCCGATCTTCAGTGTTGCTGCCACAGATATT	CAGACGTGTGCTCTTCCGATCTAGTGTCCACCAGTGAATGGTATG	7607414	7607459	7607356	7607378	7607477	7607499	7607356	7607499	82_40	40
X_102857400_102857445	29091	2	23	AC	X	46	CTACACGACGCTCTTCCGATCTTCATCTAGTCCGCCATTACCAGA	CAGACGTGTGCTCTTCCGATCTAAGCCCCCTAAAGATGGAGACTG	102857400	102857445	102857342	102857364	102857517	102857539	102857342	102857539	82_40	40
X_55007144_55007189	29092	2	23	AC	X	46	CTACACGACGCTCTTCCGATCTTCCTAGCCCAGTCCTGCATTTAT	CAGACGTGTGCTCTTCCGATCTAGCTTTTGCAATTCTGATTCTTTGGT	55007144	55007189	55007070	55007092	55007225	55007250	55007070	55007250	82_40	40
X_83977298_83977343	29093	2	23	AC	X	46	CTACACGACGCTCTTCCGATCTTCCTTCCTTTATTCCTTGTCTTCCT	CAGACGTGTGCTCTTCCGATCTAGCAGACATTTCGGTGAAAACCT	83977298	83977343	83977210	83977234	83977389	83977411	83977210	83977411	82_40	40
X_3326943_3326988	29094	2	23	AC	X	46	CTACACGACGCTCTTCCGATCTTCCTTGCTCCCTAGAACTCAGAC	CAGACGTGTGCTCTTCCGATCTAGCTTCAATTGTGAATGCAGCTA	3326943	3326988	3326896	3326918	3327060	3327082	3326896	3327082	82_40	40
X_137777149_137777194	29095	2	23	AC	X	46	CTACACGACGCTCTTCCGATCTTCTCAAAGTGTCTCCCAGTGGAT	CAGACGTGTGCTCTTCCGATCTAGTATCCATTTGCCCCTCATTGG	137777149	137777194	137777111	137777133	137777266	137777288	137777111	137777288	82_40	40
X_103456255_103456300	29096	2	23	AC	X	46	CTACACGACGCTCTTCCGATCTTCTGGTATTGGTGGACTGGGAAT	CAGACGTGTGCTCTTCCGATCTGATCCCCACAGTTCTTCATTGCT	103456255	103456300	103456192	103456214	103456313	103456335	103456192	103456335	82_40	40
X_133281918_133281963	29097	2	23	AC	X	46	CTACACGACGCTCTTCCGATCTTCTTGAAACTGTCTTTGAGGCCC	CAGACGTGTGCTCTTCCGATCTTGCCATGTAGAAAAGGCAGTTGT	133281918	133281963	133281859	133281881	133282005	133282027	133281859	133282027	82_40	40
X_130460317_130460362	29098	2	23	AC	X	46	CTACACGACGCTCTTCCGATCTTGAATGTAAACAAACAAGGACCCA	CAGACGTGTGCTCTTCCGATCTCTCCGAACAAAATACCCCTCTCC	130460317	130460362	130460272	130460295	130460367	130460389	130460272	130460389	82_40	40
X_147174888_147174933	29099	2	23	AC	X	46	CTACACGACGCTCTTCCGATCTTGACCTTCTTACCAGGTCCACTC	CAGACGTGTGCTCTTCCGATCTGGACCCCATAGCCTGAAACATCT	147174888	147174933	147174820	147174842	147174935	147174957	147174820	147174957	82_40	40
X_37836954_37836999	29100	2	23	AC	X	46	CTACACGACGCTCTTCCGATCTTGATTTCGGTATGGGGACCAATG	CAGACGTGTGCTCTTCCGATCTGCTTGTGAGTCACCCTACTCTTC	37836954	37836999	37836929	37836951	37837046	37837068	37836929	37837068	82_40	40
X_24820042_24820087	29101	2	23	AC	X	46	CTACACGACGCTCTTCCGATCTTGCTATTAGGCTTTGAACCCAGG	CAGACGTGTGCTCTTCCGATCTAGACTGCTTTCGAACTGTAGCTG	24820042	24820087	24819966	24819988	24820161	24820183	24819966	24820183	82_40	40
X_102718881_102718926	29102	2	23	AC	X	46	CTACACGACGCTCTTCCGATCTTGGAAAAGCATTCATTGTAGCCA	CAGACGTGTGCTCTTCCGATCTGTACTTGAGGTGGTGGAGCTAGA	102718881	102718926	102718817	102718839	102718937	102718959	102718817	102718959	82_40	40
X_146706199_146706244	29103	2	23	AC	X	46	CTACACGACGCTCTTCCGATCTTGGATCATCGGTAGGTTAGGAGG	CAGACGTGTGCTCTTCCGATCTAGAGTCTAATTAGGTTTTACTGTGGC	146706199	146706244	146706123	146706145	146706312	146706337	146706123	146706337	82_40	40
X_141859650_141859695	29104	2	23	AC	X	46	CTACACGACGCTCTTCCGATCTTGGCTTTCTTTCCTACACCTCAG	CAGACGTGTGCTCTTCCGATCTTTTTGGAGTCAAAGGAGGGAGGA	141859650	141859695	141859568	141859590	141859754	141859776	141859568	141859776	82_40	40
X_54294514_54294559	29105	2	23	AC	X	46	CTACACGACGCTCTTCCGATCTTGTACACTGGAGATACATGGCAA	CAGACGTGTGCTCTTCCGATCTCCTGAGTATTGGGTGTGTTTGCT	54294514	54294559	54294423	54294445	54294610	54294632	54294423	54294632	82_40	40
X_86189621_86189666	29106	2	23	AC	X	46	CTACACGACGCTCTTCCGATCTTGTGCAGATTTGACCTTGTTACC	CAGACGTGTGCTCTTCCGATCTTTACCAGCCAATGACAAACACCT	86189621	86189666	86189528	86189550	86189670	86189692	86189528	86189692	82_40	40
X_32159796_32159841	29107	2	23	AC	X	46	CTACACGACGCTCTTCCGATCTTGTGCCTCCTAAAACATCTTATTCCT	CAGACGTGTGCTCTTCCGATCTGGCCCATCATTTCTTGTGTAACT	32159796	32159841	32159699	32159724	32159918	32159940	32159699	32159940	82_40	40
X_138182204_138182249	29108	2	23	AC	X	46	CTACACGACGCTCTTCCGATCTTGTGGGTCATCCTTCCCATTACT	CAGACGTGTGCTCTTCCGATCTAGAAGTTATTTTGCCTCCCTGGC	138182204	138182249	138182170	138182192	138182271	138182293	138182170	138182293	82_40	40
X_102948484_102948529	29109	2	23	AC	X	46	CTACACGACGCTCTTCCGATCTTTAAAACAGTGGGGTGGATCCCT	CAGACGTGTGCTCTTCCGATCTCTGGAACAGTCAGGTTCCAAGTC	102948484	102948529	102948390	102948412	102948540	102948562	102948390	102948562	82_40	40
X_120662233_120662278	29110	2	23	AC	X	46	CTACACGACGCTCTTCCGATCTTTGCTTTAGAGAGGAAACCTGCC	CAGACGTGTGCTCTTCCGATCTTTTTGGAAAGGGAGCATCGGTAG	120662233	120662278	120662183	120662205	120662284	120662306	120662183	120662306	82_40	40
X_143412428_143412473	29111	2	23	AC	X	46	CTACACGACGCTCTTCCGATCTTTGGGAGAATGGAAGCTCATTGG	CAGACGTGTGCTCTTCCGATCTAGGAGCAAGGTACAGGGAAGTAA	143412428	143412473	143412390	143412412	143412516	143412538	143412390	143412538	82_40	40
X_103024401_103024446	29112	2	23	AC	X	46	CTACACGACGCTCTTCCGATCTTTGTTCTGTGCAGATATGGTCGG	CAGACGTGTGCTCTTCCGATCTGGCCACTTTGCTCTCATTTACCT	103024401	103024446	103024348	103024370	103024475	103024497	103024348	103024497	82_40	40
X_118025903_118025948	29113	2	23	AC	X	46	CTACACGACGCTCTTCCGATCTTTTCAGGGCTAATCTCTGCCAAC	CAGACGTGTGCTCTTCCGATCTAGAAGCTCAGAAGGCTTTGCTTT	118025903	118025948	118025868	118025890	118026003	118026025	118025868	118026025	82_40	40
X_17579696_17579741	29165	2	23	AC	X	46	CTACACGACGCTCTTCCGATCTGAGCCAAGAGGAGTCTACGTCTA	CAGACGTGTGCTCTTCCGATCTTTTCTAAAAGTGGGCACCAAGCA	17579696	17579741	17579600	17579622	17579810	17579832	17579600	17579832	84_40	40
X_43376980_43377025	29445	2	23	AG	X	46	CTACACGACGCTCTTCCGATCTAAGAAGGGATGCGAATGGTGTAG	CAGACGTGTGCTCTTCCGATCTAAGTCTGTCCCACATCCTCTCTC	43376980	43377025	43376897	43376919	43377085	43377107	43376897	43377107	97_40	40
X_106687808_106687853	29446	2	23	AG	X	46	CTACACGACGCTCTTCCGATCTCACGATGGCTTTCACTTCCAGAT	CAGACGTGTGCTCTTCCGATCTCCCCCATCAAAATTTATCCATCCCT	106687808	106687853	106687759	106687781	106687965	106687989	106687759	106687989	97_40	40
X_146320855_146320900	29447	2	23	AG	X	46	CTACACGACGCTCTTCCGATCTCCCAGACAAGGTTCCTATCTTGC	CAGACGTGTGCTCTTCCGATCTATGTCTCCACTTAACCTCGTGGA	146320855	146320900	146320766	146320788	146320935	146320957	146320766	146320957	97_40	40
X_19740688_19740733	29028	2	23	AC	X	46	CTACACGACGCTCTTCCGATCTAAAGAGGTCACTAGGGCTTCCAT	CAGACGTGTGCTCTTCCGATCTGGAATATTTCTGTGCTTGCAGCC	19740688	19740733	19740572	19740594	19740753	19740775	19740572	19740775	114_40	40
X_21585914_21585959	29029	2	23	AC	X	46	CTACACGACGCTCTTCCGATCTAAGCCCTCATCTAACCTGAGAGT	CAGACGTGTGCTCTTCCGATCTTGGGGAAAAATAAGTCCTACAAGA	21585914	21585959	21585857	21585879	21586026	21586049	21585857	21586049	114_40	40
X_104701026_104701071	29030	2	23	AC	X	46	CTACACGACGCTCTTCCGATCTAAGGTTGGTGGAGTATTCTGTAGAT	CAGACGTGTGCTCTTCCGATCTAAACTGCTCTAGCCTCTTTCAGC	104701026	104701071	104700929	104700953	104701078	104701100	104700929	104701100	114_40	40
X_129239830_129239875	29031	2	23	AC	X	46	CTACACGACGCTCTTCCGATCTAAGTGGCATGTCAGTTTTCCTGT	CAGACGTGTGCTCTTCCGATCTTTTGAAACCCCTCCCTTACCAGA	129239830	129239875	129239756	129239778	129239876	129239898	129239756	129239898	114_40	40
X_37655144_37655189	29032	2	23	AC	X	46	CTACACGACGCTCTTCCGATCTAATAGTCCTGCATTTGAGAACCT	CAGACGTGTGCTCTTCCGATCTTAATATGAGGCACAGCGTGATGA	37655144	37655189	37655100	37655122	37655262	37655284	37655100	37655284	114_40	40
X_124940538_124940583	29033	2	23	AC	X	46	CTACACGACGCTCTTCCGATCTAATAGTCTGAGCTGCAGGGAGAG	CAGACGTGTGCTCTTCCGATCTCAAATGCAGCATGCATGTAGGTA	124940538	124940583	124940461	124940483	124940586	124940608	124940461	124940608	114_40	40
X_49736726_49736771	29034	2	23	AC	X	46	CTACACGACGCTCTTCCGATCTACAAAGAACACTCTTACACCCTT	CAGACGTGTGCTCTTCCGATCTAATTATTTGGGGGTAAAGGGCCA	49736726	49736771	49736636	49736658	49736813	49736835	49736636	49736835	114_40	40
X_96584891_96584936	37856	2	23	AC	X	46	CTACACGACGCTCTTCCGATCTTCTGGGCACATCTATTGGCATTT	CAGACGTGTGCTCTTCCGATCTTCTCCTTCTCCCCTAGGCAATTC	96584891	96584936	96584844	96584866	96584980	96585002	96584844	96585002	124_40	40
X_27765400_27765444	28801	3	15	AGG	X	45	CTACACGACGCTCTTCCGATCTTACCCTTTAGTGGGAGAGGAGGA	CAGACGTGTGCTCTTCCGATCTAACGAATACTGCTCATGGTTGCC	27765400	27765444	27765319	27765341	27765484	27765506	27765319	27765506	145_42	42
X_68535642_68535686	28735	3	15	AAC	X	45	CTACACGACGCTCTTCCGATCTCCTTGAGTCTATGGTGCAACCTG	CAGACGTGTGCTCTTCCGATCTAGTTTAAGGGTGGGTGACAGAGT	68535642	68535686	68535558	68535580	68535708	68535730	68535558	68535730	113_40	40
X_63026150_63026194	28754	3	15	AAT	X	45	CTACACGACGCTCTTCCGATCTAAGAAATGGAGGCAGAGAAAGGC	CAGACGTGTGCTCTTCCGATCTGCTAAAAGCATGGACACTGGAGA	63026150	63026194	63026070	63026092	63026226	63026248	63026070	63026248	113_40	40
X_18654457_18654501	28755	3	15	AAT	X	45	CTACACGACGCTCTTCCGATCTACTTACTATGGCCAGGCACAATG	CAGACGTGTGCTCTTCCGATCTACCTTGGGCAGGTTAATGTCAAG	18654457	18654501	18654419	18654441	18654574	18654596	18654419	18654596	113_40	40
X_131696413_131696457	28756	3	15	AAT	X	45	CTACACGACGCTCTTCCGATCTGGGAAGGGAATCCAGGGTAGAAT	CAGACGTGTGCTCTTCCGATCTCGGCAAGGTGATACTCCATCTC	131696413	131696457	131696344	131696366	131696462	131696483	131696344	131696483	113_40	40
10_52762926_52762970	29804	3	15	AAC	10	45	CTACACGACGCTCTTCCGATCTTTGGGTATGCTTTCTCGTGTCTG	CAGACGTGTGCTCTTCCGATCTCTTCACTATGTCCAATGCAGGCT	52762926	52762970	52762894	52762916	52762980	52763002	52762894	52763002	118_40	40
2_107420069_107420113	29953	3	15	AAC	2	45	CTACACGACGCTCTTCCGATCTGGTGTGACTGGCTGGAGAAATAA	CAGACGTGTGCTCTTCCGATCTAAATCCTCTTGGTGCAAGCTGAA	107420069	107420113	107419987	107420009	107420185	107420207	107419987	107420207	118_40	40
Y_8634382_8634425	62174	2	22	AC	Y	44	CTACACGACGCTCTTCCGATCTAGCCAAATTCCTGTAAGCAGACT	CAGACGTGTGCTCTTCCGATCTGGGACTTCTGCAAAACCATACCA	8634382	8634425	8634349	8634371	8634501	8634523	8634349	8634523	137_43	43
6_75917841_75917884	70753	2	22	AG	6	44	CTACACGACGCTCTTCCGATCTCCGTCCAGAAAGGGAAAAGGAAA	CAGACGTGTGCTCTTCCGATCTACATGCTCCTCAGTCAACAACTC	75917841	75917884	75917761	75917783	75917951	75917973	75917761	75917973	140_43	43
Y_16447159_16447202	58721	2	22	AC	Y	44	CTACACGACGCTCTTCCGATCTATGCAGGCTTCATTACATAGGGC	CAGACGTGTGCTCTTCCGATCTGTTGGGAACTGTGGACAAAAACC	16447159	16447202	16447107	16447129	16447204	16447226	16447107	16447226	143_43	43
Y_18017109_18017152	34313	2	22	AT	Y	44	CTACACGACGCTCTTCCGATCTTGGGGGTCACAATATTTTTCCAGT	CAGACGTGTGCTCTTCCGATCTTGTCATCACTCTGACCACAGCTA	18017109	18017152	18017074	18017097	18017169	18017191	18017074	18017191	144_43	40
3_140208960_140209003	45590	2	22	AC	3	44	CTACACGACGCTCTTCCGATCTGGAGGATGGCAACAGACAAGAAA	CAGACGTGTGCTCTTCCGATCTGACCCAGAGGATCTGGTTAGAGG	140208960	140209003	140208819	140208841	140209020	140209042	140208819	140209042	144_43	40
X_143088958_143089001	29179	2	22	AC	X	44	CTACACGACGCTCTTCCGATCTTAGTCAGCGTTTACCTTCATGGG	CAGACGTGTGCTCTTCCGATCTTTTTTCAGGCTCTCATGTTTCTTT	143088958	143089001	143088909	143088931	143089060	143089083	143088909	143089083	145_42	42
X_19508259_19508302	29186	2	22	AC	X	44	CTACACGACGCTCTTCCGATCTTCTGTTGTTTAGAAGCCATGCCC	CAGACGTGTGCTCTTCCGATCTTCAAAGACATGCAAAACTGAGCA	19508259	19508302	19508172	19508194	19508332	19508354	19508172	19508354	145_42	42
X_107532473_107532516	29206	2	22	AC	X	44	CTACACGACGCTCTTCCGATCTTTGGGATAACGGGGAAGTTTGAC	CAGACGTGTGCTCTTCCGATCTACAAACTATTTGAGAGTGAGTTGCAG	107532473	107532516	107532391	107532413	107532580	107532605	107532391	107532605	145_42	42
X_30218304_30218347	29161	2	22	AC	X	44	CTACACGACGCTCTTCCGATCTGAAACTGACAAACCTCTAGCCAGG	CAGACGTGTGCTCTTCCGATCTTCATGTCCATGTGAACAGTAGTGA	30218304	30218347	30218271	30218294	30218400	30218423	30218271	30218423	146_42	42
X_131962722_131962765	29168	2	22	AC	X	44	CTACACGACGCTCTTCCGATCTGCACTAGAAAACTTCCTGGGGAT	CAGACGTGTGCTCTTCCGATCTTCACACCTATGTTTGTGTGTGTA	131962722	131962765	131962666	131962688	131962767	131962789	131962666	131962789	146_42	42
X_55879006_55879049	29184	2	22	AC	X	44	CTACACGACGCTCTTCCGATCTTCTCATGTTTCTGTGTTTTATCATCT	CAGACGTGTGCTCTTCCGATCTTGGCATAAAATGGAAAAGGTCTTGA	55879006	55879049	55878949	55878974	55879086	55879110	55878949	55879110	146_42	42
X_136236877_136236920	29200	2	22	AC	X	44	CTACACGACGCTCTTCCGATCTTGTCTTCTCCTTCCCCCTAACTG	CAGACGTGTGCTCTTCCGATCTACTGTCTCTTAGGGTCTGTGTGT	136236877	136236920	136236854	136236876	136236958	136236980	136236854	136236980	146_42	42
X_152774520_152774563	29159	2	22	AC	X	44	CTACACGACGCTCTTCCGATCTCTTCTGTTCTCTCTTTCCCCGTC	CAGACGTGTGCTCTTCCGATCTGAAGCGAGAAAGGTCTGAGGAAG	152774520	152774563	152774460	152774482	152774571	152774593	152774460	152774593	147_42	42
X_68514574_68514617	29162	2	22	AC	X	44	CTACACGACGCTCTTCCGATCTGACAACGCCTGGCACATAGTAAG	CAGACGTGTGCTCTTCCGATCTTGGAAGGCTGTGCATATGTGTTT	68514574	68514617	68514496	68514518	68514622	68514644	68514496	68514644	147_42	42
X_98520824_98520867	29177	2	22	AC	X	44	CTACACGACGCTCTTCCGATCTTAAGATTTGGTTGTCCAGCCTGC	CAGACGTGTGCTCTTCCGATCTTGCCAGAATGATGCTTGTAAACG	98520824	98520867	98520757	98520779	98520889	98520911	98520757	98520911	147_42	42
X_123500727_123500770	29181	2	22	AC	X	44	CTACACGACGCTCTTCCGATCTTCACTGCAGAGATGATTGAATAAGA	CAGACGTGTGCTCTTCCGATCTCAGCTGAAGGGTATTTCTCTGGG	123500727	123500770	123500655	123500679	123500806	123500828	123500655	123500828	147_42	42
X_69068921_69068964	29182	2	22	AC	X	44	CTACACGACGCTCTTCCGATCTTCATATCCCGTTTAACATGTAGCA	CAGACGTGTGCTCTTCCGATCTACTCCACTACCAAAAAGGATGGA	69068921	69068964	69068863	69068886	69068977	69068999	69068863	69068999	147_42	42
X_116643938_116643981	29191	2	22	AC	X	44	CTACACGACGCTCTTCCGATCTTGCATAAAAGTTCAGTGGTGTCA	CAGACGTGTGCTCTTCCGATCTAATCAATCTGTCTTTCTCCAGGG	116643938	116643981	116643863	116643885	116643983	116644005	116643863	116644005	147_42	42
X_23395693_23395736	29193	2	22	AC	X	44	CTACACGACGCTCTTCCGATCTTGCTCACCATTAATCCCAAAGCA	CAGACGTGTGCTCTTCCGATCTACCAACCCACAGGATCAGAAAAC	23395693	23395736	23395619	23395641	23395794	23395816	23395619	23395816	147_42	42
X_56120339_56120382	29194	2	22	AC	X	44	CTACACGACGCTCTTCCGATCTTGCTTGCACTACTATGAAGTGAT	CAGACGTGTGCTCTTCCGATCTCTCCTCTCTTAGCATTCGGTTCTC	56120339	56120382	56120256	56120278	56120390	56120413	56120256	56120413	147_42	42
X_147217655_147217698	29197	2	22	AC	X	44	CTACACGACGCTCTTCCGATCTTGGTGTAATAGTGGGACTTCAGTG	CAGACGTGTGCTCTTCCGATCTTGCAAATGGACAAATGGGAAGGA	147217655	147217698	147217563	147217586	147217726	147217748	147217563	147217748	147_42	42
X_28422442_28422485	29205	2	22	AC	X	44	CTACACGACGCTCTTCCGATCTTTGCAAGTAGAAGCAAAACTGGC	CAGACGTGTGCTCTTCCGATCTACCTTTGAGCTATTGTACAACCT	28422442	28422485	28422393	28422415	28422554	28422576	28422393	28422576	147_42	42
X_17741847_17741890	29163	2	22	AC	X	44	CTACACGACGCTCTTCCGATCTGACTGTTGAGTTTCCTCACAGCA	CAGACGTGTGCTCTTCCGATCTTGTGAGGTTTTGTTCCCTCCATC	17741847	17741890	17741818	17741840	17741939	17741961	17741818	17741961	148_42	42
X_14070509_14070552	29171	2	22	AC	X	44	CTACACGACGCTCTTCCGATCTGCTGTTTTTCCAAACCTTGGGTC	CAGACGTGTGCTCTTCCGATCTTCACTCCATGTTTTCCCTTTTCCA	14070509	14070552	14070454	14070476	14070596	14070619	14070454	14070619	148_42	42
X_98618823_98618866	29178	2	22	AC	X	44	CTACACGACGCTCTTCCGATCTTACTTATATCACCACCCCCTCCC	CAGACGTGTGCTCTTCCGATCTTTTCTATGTTCTTCCTCCTCCCG	98618823	98618866	98618796	98618818	98618900	98618922	98618796	98618922	148_42	42
X_105150758_105150801	29192	2	22	AC	X	44	CTACACGACGCTCTTCCGATCTTGCCAATAATATGCCATGTGCTCT	CAGACGTGTGCTCTTCCGATCTTTGCCAGGTGTAACTGCAAGAAT	105150758	105150801	105150716	105150739	105150812	105150834	105150716	105150834	148_42	42
X_105636609_105636652	29195	2	22	AC	X	44	CTACACGACGCTCTTCCGATCTTGCTTTGTTCTCTACTCCCTCCA	CAGACGTGTGCTCTTCCGATCTTAGACATAAGGGGGCACTACAGG	105636609	105636652	105636534	105636556	105636666	105636688	105636534	105636688	148_42	42
X_105366282_105366325	29160	2	22	AC	X	44	CTACACGACGCTCTTCCGATCTCTTTAGAAATCTATCATAAACGCCTGT	CAGACGTGTGCTCTTCCGATCTAAGCTGTGGGATCTCTCTCTCTC	105366282	105366325	105366250	105366276	105366339	105366361	105366250	105366361	149_42	42
X_143695814_143695857	29166	2	22	AC	X	44	CTACACGACGCTCTTCCGATCTGAGCCATCTAGCTGCAGGAATTT	CAGACGTGTGCTCTTCCGATCTTCAATCTTTGCATGTTCCCACCA	143695814	143695857	143695727	143695749	143695865	143695887	143695727	143695887	149_42	42
X_103407777_103407820	29174	2	22	AC	X	44	CTACACGACGCTCTTCCGATCTGTGCAAGTTGAGGTTTTCCTTGC	CAGACGTGTGCTCTTCCGATCTACCCAATAACTGGTGATCTAACCC	103407777	103407820	103407684	103407706	103407854	103407877	103407684	103407877	149_42	42
X_49458625_49458668	29175	2	22	AC	X	44	CTACACGACGCTCTTCCGATCTGTTTGCATGGCTTTCATTCCTCC	CAGACGTGTGCTCTTCCGATCTTGCTGAAGAGAGAGAGGATGAGG	49458625	49458668	49458575	49458597	49458720	49458742	49458575	49458742	149_42	42
X_74743332_74743375	29185	2	22	AC	X	44	CTACACGACGCTCTTCCGATCTTCTCTCTGTCTCCCTTCGTTCTC	CAGACGTGTGCTCTTCCGATCTCTATGGCTCGCATCTTTCACACT	74743332	74743375	74743277	74743299	74743378	74743400	74743277	74743400	149_42	42
X_20413432_20413475	29188	2	22	AC	X	44	CTACACGACGCTCTTCCGATCTTGATTGCAAAACTAACCCTGGCT	CAGACGTGTGCTCTTCCGATCTGACAATACAGCTGGGCAACATCT	20413432	20413475	20413356	20413378	20413512	20413534	20413356	20413534	149_42	42
X_15437467_15437510	29190	2	22	AC	X	44	CTACACGACGCTCTTCCGATCTTGCAGTGGAAGCATGGATAAGTC	CAGACGTGTGCTCTTCCGATCTAGTGCGTTATGAACCCAGCTATG	15437467	15437510	15437444	15437466	15437629	15437651	15437444	15437651	149_42	42
X_99634303_99634346	29167	2	22	AC	X	44	CTACACGACGCTCTTCCGATCTGCAAAACGAGTCCTTCCCAAATG	CAGACGTGTGCTCTTCCGATCTCCATCAAGGGCAACCATTCCTTA	99634303	99634346	99634241	99634263	99634425	99634447	99634241	99634447	150_42	42
X_148123289_148123332	29202	2	22	AC	X	44	CTACACGACGCTCTTCCGATCTTTACCCAATTTGGCCTGTAGGTG	CAGACGTGTGCTCTTCCGATCTATTGTTGCTCAAAGTGGTGGGTA	148123289	148123332	148123261	148123283	148123356	148123378	148123261	148123378	150_42	42
X_32174091_32174134	29158	2	22	AC	X	44	CTACACGACGCTCTTCCGATCTCTGAACAGCTCCAGAGGGTTAAT	CAGACGTGTGCTCTTCCGATCTCAATAGCCCCATTGCTCAGTGAA	32174091	32174134	32174036	32174058	32174195	32174217	32174036	32174217	151_42	42
X_148059145_148059188	29199	2	22	AC	X	44	CTACACGACGCTCTTCCGATCTTGTCCACCTCTCATTGAAAACCA	CAGACGTGTGCTCTTCCGATCTATGAGCCTTAGGACAATGCTGTG	148059145	148059188	148059069	148059091	148059201	148059223	148059069	148059223	151_42	42
X_77258297_77258340	29155	2	22	AC	X	44	CTACACGACGCTCTTCCGATCTCGAGTGGAGGGTGTAGGAATGTA	CAGACGTGTGCTCTTCCGATCTTACCAGTCTTGACCCCAAACAAT	77258297	77258340	77258206	77258228	77258405	77258427	77258206	77258427	152_42	42
X_143052064_143052107	29157	2	22	AC	X	44	CTACACGACGCTCTTCCGATCTCTCTGTCTGAGGAAGTCACAGGA	CAGACGTGTGCTCTTCCGATCTTTTTACTTACTTCCGCTCCCCAC	143052064	143052107	143051966	143051988	143052113	143052135	143051966	143052135	152_42	42
X_7706698_7706741	29164	2	22	AC	X	44	CTACACGACGCTCTTCCGATCTGAGATGGAAATAGGCTGTGGCTC	CAGACGTGTGCTCTTCCGATCTGCATTCCAATTTTCACCTCCAGC	7706698	7706741	7706671	7706693	7706773	7706795	7706671	7706795	152_42	42
X_42681700_42681743	29172	2	22	AC	X	44	CTACACGACGCTCTTCCGATCTGGAATAAGCCAGAACAGCTTGGA	CAGACGTGTGCTCTTCCGATCTCCAGGTTCCTCCTACTTCTAGGG	42681700	42681743	42681631	42681653	42681778	42681800	42681631	42681800	152_42	42
X_42730750_42730793	29176	2	22	AC	X	44	CTACACGACGCTCTTCCGATCTTAACCTCACATCTGGCTTCCAAC	CAGACGTGTGCTCTTCCGATCTTTAACTGGTGTATCCTGCCCTGA	42730750	42730793	42730665	42730687	42730866	42730888	42730665	42730888	152_42	42
X_122212836_122212879	29180	2	22	AC	X	44	CTACACGACGCTCTTCCGATCTTATCTGCAACCAAAGCTAGCAGG	CAGACGTGTGCTCTTCCGATCTTGCCAGTTTAAAACCTCTCTCTCT	122212836	122212879	122212795	122212817	122212888	122212911	122212795	122212911	152_42	42
X_64092210_64092253	29203	2	22	AC	X	44	CTACACGACGCTCTTCCGATCTTTCACCAAGTCCACTCAACACTG	CAGACGTGTGCTCTTCCGATCTCCCAAAATTTCACTGACACACACA	64092210	64092253	64092159	64092181	64092256	64092279	64092159	64092279	152_42	42
X_21057518_21057561	29074	2	22	AC	X	44	CTACACGACGCTCTTCCGATCTGCCAGAATCCATGCCTGCTATAA	CAGACGTGTGCTCTTCCGATCTACTGGGAAAGAAAACTCTCTATGTGG	21057518	21057561	21057490	21057512	21057622	21057647	21057490	21057647	153_42	42
X_131169861_131169904	29173	2	22	AC	X	44	CTACACGACGCTCTTCCGATCTGGCAATATTTCCCCCACAGGTAG	CAGACGTGTGCTCTTCCGATCTATTGGCTTTGAAACGTCAGGACT	131169861	131169904	131169761	131169783	131169913	131169935	131169761	131169935	153_42	42
X_45598499_45598542	29183	2	22	AC	X	44	CTACACGACGCTCTTCCGATCTTCATATCGGTTATGGGCAGGGAT	CAGACGTGTGCTCTTCCGATCTTGCATGTCTCCTTATGGGTCTCT	45598499	45598542	45598421	45598443	45598596	45598618	45598421	45598618	153_42	42
X_86168720_86168763	29198	2	22	AC	X	44	CTACACGACGCTCTTCCGATCTTGTAAAGTGTGCTGCACCAAGAT	CAGACGTGTGCTCTTCCGATCTGATTTTCTCTCCCCCAAGAAGCA	86168720	86168763	86168662	86168684	86168788	86168810	86168662	86168810	153_42	42
X_128811719_128811762	29201	2	22	AC	X	44	CTACACGACGCTCTTCCGATCTTGTGAGGGAACTACTGCCAACTA	CAGACGTGTGCTCTTCCGATCTTACCCAGCCAATGAGGACACATA	128811719	128811762	128811630	128811652	128811819	128811841	128811630	128811841	153_42	42
X_36786368_36786411	29207	2	22	AC	X	44	CTACACGACGCTCTTCCGATCTTTTATCGTATGTTGAGCCCCTGC	CAGACGTGTGCTCTTCCGATCTTACATGGCTTGGTAGGGATGCTA	36786368	36786411	36786335	36786357	36786416	36786438	36786335	36786438	154_42	42
X_62925238_62925281	29156	2	22	AC	X	44	CTACACGACGCTCTTCCGATCTCTCCTCTGGAAGGAAGGAGACAA	CAGACGTGTGCTCTTCCGATCTCAGGAAGGGAAAACCAATGGGAA	62925238	62925281	62925164	62925186	62925310	62925332	62925164	62925332	155_42	42
X_34217000_34217043	29169	2	22	AC	X	44	CTACACGACGCTCTTCCGATCTGCCCGGCCCTAAAAGAGAAAAT	CAGACGTGTGCTCTTCCGATCTTGCTAAGAGAAGCTTGAGTCCCT	34217000	34217043	34216966	34216987	34217062	34217084	34216966	34217084	155_42	42
X_154762330_154762373	29170	2	22	AC	X	44	CTACACGACGCTCTTCCGATCTGCTATTCATTTGGTGGTGCCCTA	CAGACGTGTGCTCTTCCGATCTTGTCACTCTAGGGAAAGGGTTCT	154762330	154762373	154762260	154762282	154762409	154762431	154762260	154762431	155_42	42
X_19700452_19700495	29187	2	22	AC	X	44	CTACACGACGCTCTTCCGATCTTGACATTGACATTGCTATCAACAG	CAGACGTGTGCTCTTCCGATCTGTGGTTGAAGTGAAAACGACCAT	19700452	19700495	19700371	19700394	19700574	19700596	19700371	19700596	155_42	42
X_23382489_23382532	29189	2	22	AC	X	44	CTACACGACGCTCTTCCGATCTTGCACTTAACATTTACACATTGTACT	CAGACGTGTGCTCTTCCGATCTTGTTGGATGTTCTGTACTGCTGG	23382489	23382532	23382428	23382453	23382580	23382602	23382428	23382602	155_42	42
X_118598126_118598169	29204	2	22	AC	X	44	CTACACGACGCTCTTCCGATCTTTCTCTTTTGGTGTTAGGCCAGA	CAGACGTGTGCTCTTCCGATCTTGGGGAAAGTGATCCTGTCATCT	118598126	118598169	118598041	118598063	118598244	118598266	118598041	118598266	155_42	42
X_13457089_13457132	29196	2	22	AC	X	44	CTACACGACGCTCTTCCGATCTTGGTGCCAAGTAGAGGATAGGAG	CAGACGTGTGCTCTTCCGATCTGCTCCCAAGTCAAGGATCTGTTT	13457089	13457132	13456999	13457021	13457168	13457190	13456999	13457190	156_42	11
X_21948158_21948201	29114	2	22	AC	X	44	CTACACGACGCTCTTCCGATCTAAAAGGTCAACAGGGATTGCTGA	CAGACGTGTGCTCTTCCGATCTTGCCTTCTCCTGTCCTTCTCAAT	21948158	21948201	21948106	21948128	21948255	21948277	21948106	21948277	82_40	40
X_13406861_13406904	29115	2	22	AC	X	44	CTACACGACGCTCTTCCGATCTAAACACTTGGTTATCCTCCACCT	CAGACGTGTGCTCTTCCGATCTAAATGGGTCAGCACCTCCAAAAA	13406861	13406904	13406788	13406810	13406945	13406967	13406788	13406967	83_40	40
X_108594560_108594603	29116	2	22	AC	X	44	CTACACGACGCTCTTCCGATCTAAATCTGTTCTAGCACCCTTGCC	CAGACGTGTGCTCTTCCGATCTCAGCAGTAGAGTCATTAAGGCCA	108594560	108594603	108594476	108594498	108594637	108594659	108594476	108594659	83_40	40
X_19109611_19109654	29117	2	22	AC	X	44	CTACACGACGCTCTTCCGATCTAACATTGTTCTGAAGGTCTGAGC	CAGACGTGTGCTCTTCCGATCTGCCCCTGGTGTAGAGGAAAATCA	19109611	19109654	19109522	19109544	19109721	19109743	19109522	19109743	83_40	40
X_98854697_98854740	29119	2	22	AC	X	44	CTACACGACGCTCTTCCGATCTAACTCGGACATATATGCAACCCG	CAGACGTGTGCTCTTCCGATCTCCTGCTCTTCATCAATCCTCCCT	98854697	98854740	98854607	98854629	98854778	98854800	98854607	98854800	83_40	40
X_63781555_63781598	29120	2	22	AC	X	44	CTACACGACGCTCTTCCGATCTAAGAAGACAAGGAGGCCCATTAC	CAGACGTGTGCTCTTCCGATCTATAGTACTTTTTCTCTCTCTCTCTCTC	63781555	63781598	63781463	63781485	63781599	63781625	63781463	63781625	83_40	40
X_111323624_111323667	29121	2	22	AC	X	44	CTACACGACGCTCTTCCGATCTAAGCAGAGCCAAGATTGTATGGG	CAGACGTGTGCTCTTCCGATCTGTCCCTGGAAGATGCTGTTTTCA	111323624	111323667	111323573	111323595	111323707	111323729	111323573	111323729	83_40	40
X_140713410_140713453	29122	2	22	AC	X	44	CTACACGACGCTCTTCCGATCTAAGGTAGAGAGGAATGTCCATGA	CAGACGTGTGCTCTTCCGATCTCTCTACCAGGCAACTTTCCCAAG	140713410	140713453	140713372	140713394	140713455	140713477	140713372	140713477	83_40	40
X_68279884_68279927	29123	2	22	AC	X	44	CTACACGACGCTCTTCCGATCTAATCCCCACTCCCTGTTTCTTCT	CAGACGTGTGCTCTTCCGATCTGAATCCCCAGCTCTCCTGCTAT	68279884	68279927	68279817	68279839	68279929	68279950	68279817	68279950	83_40	40
X_17319521_17319564	29124	2	22	AC	X	44	CTACACGACGCTCTTCCGATCTAATGAGCACATGAGGTTGTCTCC	CAGACGTGTGCTCTTCCGATCTTTACTTGGTGCCATCGAAGTCTG	17319521	17319564	17319495	17319517	17319580	17319602	17319495	17319602	83_40	40
X_50270097_50270140	29125	2	22	AC	X	44	CTACACGACGCTCTTCCGATCTAATTTGAAGTGGAAGGCAATGCG	CAGACGTGTGCTCTTCCGATCTGCACAGATCAATGCACAGCCATA	50270097	50270140	50270041	50270063	50270141	50270163	50270041	50270163	83_40	40
X_55975767_55975810	29126	2	22	AC	X	44	CTACACGACGCTCTTCCGATCTACAAATGCAGACTTCTCTAGGGC	CAGACGTGTGCTCTTCCGATCTTAAGTGCTCCAGAAACCTACCCC	55975767	55975810	55975678	55975700	55975880	55975902	55975678	55975902	83_40	40
X_80565484_80565527	29127	2	22	AC	X	44	CTACACGACGCTCTTCCGATCTACATTTTCCTCCAAGCACTTTTT	CAGACGTGTGCTCTTCCGATCTAAAACAAATTCCTAACCAGTGGG	80565484	80565527	80565433	80565455	80565572	80565594	80565433	80565594	83_40	40
X_98338830_98338873	29128	2	22	AC	X	44	CTACACGACGCTCTTCCGATCTACCACCCCAAAGCATCAGTTTTT	CAGACGTGTGCTCTTCCGATCTACACAAGGCTCCTACAGAGTACA	98338830	98338873	98338796	98338818	98338945	98338967	98338796	98338967	83_40	40
X_70774985_70775028	29129	2	22	AC	X	44	CTACACGACGCTCTTCCGATCTACCATCCATTAAGCATGAGTTACA	CAGACGTGTGCTCTTCCGATCTCACTGCGTGATTTGGACTCAAAC	70774985	70775028	70774958	70774981	70775069	70775091	70774958	70775091	83_40	40
X_25617154_25617197	29130	2	22	AC	X	44	CTACACGACGCTCTTCCGATCTACCCTCAGTATGGTACACTGTCT	CAGACGTGTGCTCTTCCGATCTAAGCAAAGCAGGACCACAAAAAC	25617154	25617197	25617067	25617089	25617214	25617236	25617067	25617236	83_40	40
X_103844332_103844375	29131	2	22	AC	X	44	CTACACGACGCTCTTCCGATCTACCTTCTGCATGTTTATTTTTCCCT	CAGACGTGTGCTCTTCCGATCTGTCGTTTCATATCTCCACCAACCT	103844332	103844375	103844246	103844270	103844391	103844414	103844246	103844414	83_40	40
X_21694590_21694633	29132	2	22	AC	X	44	CTACACGACGCTCTTCCGATCTACTCCTATGTCCTCGGTAACACA	CAGACGTGTGCTCTTCCGATCTAATCCCGGAAGCAAATATGCCAA	21694590	21694633	21694543	21694565	21694701	21694723	21694543	21694723	83_40	40
X_120330186_120330229	29133	2	22	AC	X	44	CTACACGACGCTCTTCCGATCTACTTCCCCAAGGTAACCAGAGTT	CAGACGTGTGCTCTTCCGATCTACGCAAATTCCACTAGGTACTGA	120330186	120330229	120330106	120330128	120330296	120330318	120330106	120330318	83_40	40
X_39017939_39017982	29134	2	22	AC	X	44	CTACACGACGCTCTTCCGATCTACTTTGACTGTCCCCTGCATTTT	CAGACGTGTGCTCTTCCGATCTTTACCTGGATCCACTGAAAGGCT	39017939	39017982	39017866	39017888	39018006	39018028	39017866	39018028	83_40	40
X_85802528_85802571	29135	2	22	AC	X	44	CTACACGACGCTCTTCCGATCTAGAAAATGAAACCTAACGTGCTGC	CAGACGTGTGCTCTTCCGATCTGTGTTTCACTATAGGCAGCTGTG	85802528	85802571	85802501	85802524	85802572	85802594	85802501	85802594	83_40	40
X_141604474_141604517	29136	2	22	AC	X	44	CTACACGACGCTCTTCCGATCTAGAGCTGAAAAATAAAGCACCACT	CAGACGTGTGCTCTTCCGATCTGGAGCAATTGGCTGACTTCTACA	141604474	141604517	141604404	141604427	141604573	141604595	141604404	141604595	83_40	40
X_97997955_97997998	29137	2	22	AC	X	44	CTACACGACGCTCTTCCGATCTAGCATTTTTCACCACTGGGCATA	CAGACGTGTGCTCTTCCGATCTCACACTCAAAGTTCCTGTCCTCA	97997955	97997998	97997925	97997947	97998065	97998087	97997925	97998087	83_40	40
X_18669341_18669384	29138	2	22	AC	X	44	CTACACGACGCTCTTCCGATCTAGGCCAGCTTCATGTGACTAATG	CAGACGTGTGCTCTTCCGATCTGGATGCTGTCGACAAGTTTCTCT	18669341	18669384	18669282	18669304	18669445	18669467	18669282	18669467	83_40	40
X_111645629_111645672	29139	2	22	AC	X	44	CTACACGACGCTCTTCCGATCTAGTATCTTGCAAGCACATGGTGT	CAGACGTGTGCTCTTCCGATCTAGTGGTCAGAAAGCACAAGTGAA	111645629	111645672	111645531	111645553	111645730	111645752	111645531	111645752	83_40	40
X_56254308_56254351	29140	2	22	AC	X	44	CTACACGACGCTCTTCCGATCTATACATACTCAACCCCCTAGCCC	CAGACGTGTGCTCTTCCGATCTGTGCCTCAGGCTGCTATCTTTAT	56254308	56254351	56254283	56254305	56254371	56254393	56254283	56254393	83_40	40
X_142357368_142357411	29141	2	22	AC	X	44	CTACACGACGCTCTTCCGATCTATGGGAGAATCACTTAAGCCCCT	CAGACGTGTGCTCTTCCGATCTCCCCAGAAACCCAGGGAATTTTT	142357368	142357411	142357272	142357294	142357470	142357492	142357272	142357492	83_40	40
X_83753830_83753873	29142	2	22	AC	X	44	CTACACGACGCTCTTCCGATCTATGTAGGTATACACCATTTATTTGGG	CAGACGTGTGCTCTTCCGATCTTTTTGGCAGAGCTTTAGCTAGGA	83753830	83753873	83753749	83753774	83753896	83753918	83753749	83753918	83_40	40
X_48361313_48361356	29143	2	22	AC	X	44	CTACACGACGCTCTTCCGATCTATTTCACCATTGTCACAGGCTCT	CAGACGTGTGCTCTTCCGATCTAAAACCACTTGTAGCCAGACAGG	48361313	48361356	48361276	48361298	48361429	48361451	48361276	48361451	83_40	40
X_79952019_79952062	29144	2	22	AC	X	44	CTACACGACGCTCTTCCGATCTCAAATGAAGACATAAATTCAGAGAGGT	CAGACGTGTGCTCTTCCGATCTATGGGAGAGAAAACACTATAGCA	79952019	79952062	79951943	79951969	79952138	79952160	79951943	79952160	83_40	40
X_47710291_47710334	29145	2	22	AC	X	44	CTACACGACGCTCTTCCGATCTCAATTTTGACCCCAGTGGCCTAT	CAGACGTGTGCTCTTCCGATCTTAAGGGAGAAAAGCAAGTGCTGG	47710291	47710334	47710197	47710219	47710387	47710409	47710197	47710409	83_40	40
X_21022835_21022878	29146	2	22	AC	X	44	CTACACGACGCTCTTCCGATCTCACAAATGCACAGATACCACTAGGA	CAGACGTGTGCTCTTCCGATCTAGATTGAGAGGCAATAACTGGCA	21022835	21022878	21022745	21022769	21022888	21022910	21022745	21022910	83_40	40
X_85637465_85637508	29147	2	22	AC	X	44	CTACACGACGCTCTTCCGATCTCAGAGTTGCAAATATGCTACATTCA	CAGACGTGTGCTCTTCCGATCTCAGTGTTCAATGTCCTCACAGGT	85637465	85637508	85637439	85637463	85637567	85637589	85637439	85637589	83_40	40
X_52097873_52097916	29148	2	22	AC	X	44	CTACACGACGCTCTTCCGATCTCATAATTTGGATTTGCCAGCCCC	CAGACGTGTGCTCTTCCGATCTATGTAAGCACCCTATTGGTTCGG	52097873	52097916	52097770	52097792	52097925	52097947	52097770	52097947	83_40	40
X_106188645_106188688	29149	2	22	AC	X	44	CTACACGACGCTCTTCCGATCTCCCAACACTGCATGCATAAATCC	CAGACGTGTGCTCTTCCGATCTAGCTCCCTTCTGTGTAGGAACTT	106188645	106188688	106188552	106188574	106188720	106188742	106188552	106188742	83_40	40
X_7206681_7206724	29150	2	22	AC	X	44	CTACACGACGCTCTTCCGATCTCCCTTTCCCTTGTATTTTCACCCA	CAGACGTGTGCTCTTCCGATCTCCCAAGTTTTAAGAGGTCCCACA	7206681	7206724	7206597	7206620	7206796	7206818	7206597	7206818	83_40	40
X_129966986_129967029	29151	2	22	AC	X	44	CTACACGACGCTCTTCCGATCTCCTAACTGGTGGGCCAGATAAAC	CAGACGTGTGCTCTTCCGATCTAGTACCTGCTTTCATTCTAGGGT	129966986	129967029	129966904	129966926	129967052	129967074	129966904	129967074	83_40	40
X_94129755_94129798	29152	2	22	AC	X	44	CTACACGACGCTCTTCCGATCTCCTCATTTCGTAGATGACATGCTCTTA	CAGACGTGTGCTCTTCCGATCTCCTGAAGCCTTGCTGAATTTGC	94129755	94129798	94129707	94129733	94129816	94129837	94129707	94129837	83_40	40
X_37594097_37594140	29153	2	22	AC	X	44	CTACACGACGCTCTTCCGATCTCCTCTTTTTCAGGGAAAGGCACT	CAGACGTGTGCTCTTCCGATCTGTGGCAGACTCAACTTCTTAGCA	37594097	37594140	37594011	37594033	37594190	37594212	37594011	37594212	83_40	40
X_146374712_146374755	29154	2	22	AC	X	44	CTACACGACGCTCTTCCGATCTCCTTCCTGATGACTTGGCCTATG	CAGACGTGTGCTCTTCCGATCTAGTGGAGCTATATGGGTCCTGTA	146374712	146374755	146374636	146374658	146374802	146374824	146374636	146374824	83_40	40
X_77258297_77258340	29155	2	22	AC	X	44	CTACACGACGCTCTTCCGATCTCGAGTGGAGGGTGTAGGAATGTA	CAGACGTGTGCTCTTCCGATCTTACCAGTCTTGACCCCAAACAAT	77258297	77258340	77258206	77258228	77258405	77258427	77258206	77258427	84_40	40
X_62925238_62925281	29156	2	22	AC	X	44	CTACACGACGCTCTTCCGATCTCTCCTCTGGAAGGAAGGAGACAA	CAGACGTGTGCTCTTCCGATCTCAGGAAGGGAAAACCAATGGGAA	62925238	62925281	62925164	62925186	62925310	62925332	62925164	62925332	84_40	40
X_143052064_143052107	29157	2	22	AC	X	44	CTACACGACGCTCTTCCGATCTCTCTGTCTGAGGAAGTCACAGGA	CAGACGTGTGCTCTTCCGATCTTTTTACTTACTTCCGCTCCCCAC	143052064	143052107	143051966	143051988	143052113	143052135	143051966	143052135	84_40	40
X_32174091_32174134	29158	2	22	AC	X	44	CTACACGACGCTCTTCCGATCTCTGAACAGCTCCAGAGGGTTAAT	CAGACGTGTGCTCTTCCGATCTCAATAGCCCCATTGCTCAGTGAA	32174091	32174134	32174036	32174058	32174195	32174217	32174036	32174217	84_40	40
X_152774520_152774563	29159	2	22	AC	X	44	CTACACGACGCTCTTCCGATCTCTTCTGTTCTCTCTTTCCCCGTC	CAGACGTGTGCTCTTCCGATCTGAAGCGAGAAAGGTCTGAGGAAG	152774520	152774563	152774460	152774482	152774571	152774593	152774460	152774593	84_40	40
X_105366282_105366325	29160	2	22	AC	X	44	CTACACGACGCTCTTCCGATCTCTTTAGAAATCTATCATAAACGCCTGT	CAGACGTGTGCTCTTCCGATCTAAGCTGTGGGATCTCTCTCTCTC	105366282	105366325	105366250	105366276	105366339	105366361	105366250	105366361	84_40	40
X_30218304_30218347	29161	2	22	AC	X	44	CTACACGACGCTCTTCCGATCTGAAACTGACAAACCTCTAGCCAGG	CAGACGTGTGCTCTTCCGATCTTCATGTCCATGTGAACAGTAGTGA	30218304	30218347	30218271	30218294	30218400	30218423	30218271	30218423	84_40	40
X_68514574_68514617	29162	2	22	AC	X	44	CTACACGACGCTCTTCCGATCTGACAACGCCTGGCACATAGTAAG	CAGACGTGTGCTCTTCCGATCTTGGAAGGCTGTGCATATGTGTTT	68514574	68514617	68514496	68514518	68514622	68514644	68514496	68514644	84_40	40
X_17741847_17741890	29163	2	22	AC	X	44	CTACACGACGCTCTTCCGATCTGACTGTTGAGTTTCCTCACAGCA	CAGACGTGTGCTCTTCCGATCTTGTGAGGTTTTGTTCCCTCCATC	17741847	17741890	17741818	17741840	17741939	17741961	17741818	17741961	84_40	40
X_7706698_7706741	29164	2	22	AC	X	44	CTACACGACGCTCTTCCGATCTGAGATGGAAATAGGCTGTGGCTC	CAGACGTGTGCTCTTCCGATCTGCATTCCAATTTTCACCTCCAGC	7706698	7706741	7706671	7706693	7706773	7706795	7706671	7706795	84_40	40
X_143695814_143695857	29166	2	22	AC	X	44	CTACACGACGCTCTTCCGATCTGAGCCATCTAGCTGCAGGAATTT	CAGACGTGTGCTCTTCCGATCTTCAATCTTTGCATGTTCCCACCA	143695814	143695857	143695727	143695749	143695865	143695887	143695727	143695887	84_40	40
X_99634303_99634346	29167	2	22	AC	X	44	CTACACGACGCTCTTCCGATCTGCAAAACGAGTCCTTCCCAAATG	CAGACGTGTGCTCTTCCGATCTCCATCAAGGGCAACCATTCCTTA	99634303	99634346	99634241	99634263	99634425	99634447	99634241	99634447	84_40	40
X_131962722_131962765	29168	2	22	AC	X	44	CTACACGACGCTCTTCCGATCTGCACTAGAAAACTTCCTGGGGAT	CAGACGTGTGCTCTTCCGATCTTCACACCTATGTTTGTGTGTGTA	131962722	131962765	131962666	131962688	131962767	131962789	131962666	131962789	84_40	40
X_34217000_34217043	29169	2	22	AC	X	44	CTACACGACGCTCTTCCGATCTGCCCGGCCCTAAAAGAGAAAAT	CAGACGTGTGCTCTTCCGATCTTGCTAAGAGAAGCTTGAGTCCCT	34217000	34217043	34216966	34216987	34217062	34217084	34216966	34217084	84_40	40
X_154762330_154762373	29170	2	22	AC	X	44	CTACACGACGCTCTTCCGATCTGCTATTCATTTGGTGGTGCCCTA	CAGACGTGTGCTCTTCCGATCTTGTCACTCTAGGGAAAGGGTTCT	154762330	154762373	154762260	154762282	154762409	154762431	154762260	154762431	84_40	40
X_14070509_14070552	29171	2	22	AC	X	44	CTACACGACGCTCTTCCGATCTGCTGTTTTTCCAAACCTTGGGTC	CAGACGTGTGCTCTTCCGATCTTCACTCCATGTTTTCCCTTTTCCA	14070509	14070552	14070454	14070476	14070596	14070619	14070454	14070619	84_40	40
X_42681700_42681743	29172	2	22	AC	X	44	CTACACGACGCTCTTCCGATCTGGAATAAGCCAGAACAGCTTGGA	CAGACGTGTGCTCTTCCGATCTCCAGGTTCCTCCTACTTCTAGGG	42681700	42681743	42681631	42681653	42681778	42681800	42681631	42681800	84_40	40
X_131169861_131169904	29173	2	22	AC	X	44	CTACACGACGCTCTTCCGATCTGGCAATATTTCCCCCACAGGTAG	CAGACGTGTGCTCTTCCGATCTATTGGCTTTGAAACGTCAGGACT	131169861	131169904	131169761	131169783	131169913	131169935	131169761	131169935	84_40	40
X_103407777_103407820	29174	2	22	AC	X	44	CTACACGACGCTCTTCCGATCTGTGCAAGTTGAGGTTTTCCTTGC	CAGACGTGTGCTCTTCCGATCTACCCAATAACTGGTGATCTAACCC	103407777	103407820	103407684	103407706	103407854	103407877	103407684	103407877	84_40	40
X_49458625_49458668	29175	2	22	AC	X	44	CTACACGACGCTCTTCCGATCTGTTTGCATGGCTTTCATTCCTCC	CAGACGTGTGCTCTTCCGATCTTGCTGAAGAGAGAGAGGATGAGG	49458625	49458668	49458575	49458597	49458720	49458742	49458575	49458742	84_40	40
X_42730750_42730793	29176	2	22	AC	X	44	CTACACGACGCTCTTCCGATCTTAACCTCACATCTGGCTTCCAAC	CAGACGTGTGCTCTTCCGATCTTTAACTGGTGTATCCTGCCCTGA	42730750	42730793	42730665	42730687	42730866	42730888	42730665	42730888	84_40	40
X_98520824_98520867	29177	2	22	AC	X	44	CTACACGACGCTCTTCCGATCTTAAGATTTGGTTGTCCAGCCTGC	CAGACGTGTGCTCTTCCGATCTTGCCAGAATGATGCTTGTAAACG	98520824	98520867	98520757	98520779	98520889	98520911	98520757	98520911	84_40	40
X_98618823_98618866	29178	2	22	AC	X	44	CTACACGACGCTCTTCCGATCTTACTTATATCACCACCCCCTCCC	CAGACGTGTGCTCTTCCGATCTTTTCTATGTTCTTCCTCCTCCCG	98618823	98618866	98618796	98618818	98618900	98618922	98618796	98618922	84_40	40
X_143088958_143089001	29179	2	22	AC	X	44	CTACACGACGCTCTTCCGATCTTAGTCAGCGTTTACCTTCATGGG	CAGACGTGTGCTCTTCCGATCTTTTTTCAGGCTCTCATGTTTCTTT	143088958	143089001	143088909	143088931	143089060	143089083	143088909	143089083	84_40	40
X_122212836_122212879	29180	2	22	AC	X	44	CTACACGACGCTCTTCCGATCTTATCTGCAACCAAAGCTAGCAGG	CAGACGTGTGCTCTTCCGATCTTGCCAGTTTAAAACCTCTCTCTCT	122212836	122212879	122212795	122212817	122212888	122212911	122212795	122212911	84_40	40
X_123500727_123500770	29181	2	22	AC	X	44	CTACACGACGCTCTTCCGATCTTCACTGCAGAGATGATTGAATAAGA	CAGACGTGTGCTCTTCCGATCTCAGCTGAAGGGTATTTCTCTGGG	123500727	123500770	123500655	123500679	123500806	123500828	123500655	123500828	84_40	40
X_69068921_69068964	29182	2	22	AC	X	44	CTACACGACGCTCTTCCGATCTTCATATCCCGTTTAACATGTAGCA	CAGACGTGTGCTCTTCCGATCTACTCCACTACCAAAAAGGATGGA	69068921	69068964	69068863	69068886	69068977	69068999	69068863	69068999	84_40	40
X_45598499_45598542	29183	2	22	AC	X	44	CTACACGACGCTCTTCCGATCTTCATATCGGTTATGGGCAGGGAT	CAGACGTGTGCTCTTCCGATCTTGCATGTCTCCTTATGGGTCTCT	45598499	45598542	45598421	45598443	45598596	45598618	45598421	45598618	84_40	40
X_55879006_55879049	29184	2	22	AC	X	44	CTACACGACGCTCTTCCGATCTTCTCATGTTTCTGTGTTTTATCATCT	CAGACGTGTGCTCTTCCGATCTTGGCATAAAATGGAAAAGGTCTTGA	55879006	55879049	55878949	55878974	55879086	55879110	55878949	55879110	84_40	40
X_74743332_74743375	29185	2	22	AC	X	44	CTACACGACGCTCTTCCGATCTTCTCTCTGTCTCCCTTCGTTCTC	CAGACGTGTGCTCTTCCGATCTCTATGGCTCGCATCTTTCACACT	74743332	74743375	74743277	74743299	74743378	74743400	74743277	74743400	84_40	40
X_19508259_19508302	29186	2	22	AC	X	44	CTACACGACGCTCTTCCGATCTTCTGTTGTTTAGAAGCCATGCCC	CAGACGTGTGCTCTTCCGATCTTCAAAGACATGCAAAACTGAGCA	19508259	19508302	19508172	19508194	19508332	19508354	19508172	19508354	84_40	40
X_19700452_19700495	29187	2	22	AC	X	44	CTACACGACGCTCTTCCGATCTTGACATTGACATTGCTATCAACAG	CAGACGTGTGCTCTTCCGATCTGTGGTTGAAGTGAAAACGACCAT	19700452	19700495	19700371	19700394	19700574	19700596	19700371	19700596	84_40	40
X_20413432_20413475	29188	2	22	AC	X	44	CTACACGACGCTCTTCCGATCTTGATTGCAAAACTAACCCTGGCT	CAGACGTGTGCTCTTCCGATCTGACAATACAGCTGGGCAACATCT	20413432	20413475	20413356	20413378	20413512	20413534	20413356	20413534	84_40	40
X_23382489_23382532	29189	2	22	AC	X	44	CTACACGACGCTCTTCCGATCTTGCACTTAACATTTACACATTGTACT	CAGACGTGTGCTCTTCCGATCTTGTTGGATGTTCTGTACTGCTGG	23382489	23382532	23382428	23382453	23382580	23382602	23382428	23382602	84_40	40
X_15437467_15437510	29190	2	22	AC	X	44	CTACACGACGCTCTTCCGATCTTGCAGTGGAAGCATGGATAAGTC	CAGACGTGTGCTCTTCCGATCTAGTGCGTTATGAACCCAGCTATG	15437467	15437510	15437444	15437466	15437629	15437651	15437444	15437651	84_40	40
X_116643938_116643981	29191	2	22	AC	X	44	CTACACGACGCTCTTCCGATCTTGCATAAAAGTTCAGTGGTGTCA	CAGACGTGTGCTCTTCCGATCTAATCAATCTGTCTTTCTCCAGGG	116643938	116643981	116643863	116643885	116643983	116644005	116643863	116644005	84_40	40
X_105150758_105150801	29192	2	22	AC	X	44	CTACACGACGCTCTTCCGATCTTGCCAATAATATGCCATGTGCTCT	CAGACGTGTGCTCTTCCGATCTTTGCCAGGTGTAACTGCAAGAAT	105150758	105150801	105150716	105150739	105150812	105150834	105150716	105150834	84_40	40
X_23395693_23395736	29193	2	22	AC	X	44	CTACACGACGCTCTTCCGATCTTGCTCACCATTAATCCCAAAGCA	CAGACGTGTGCTCTTCCGATCTACCAACCCACAGGATCAGAAAAC	23395693	23395736	23395619	23395641	23395794	23395816	23395619	23395816	84_40	40
X_56120339_56120382	29194	2	22	AC	X	44	CTACACGACGCTCTTCCGATCTTGCTTGCACTACTATGAAGTGAT	CAGACGTGTGCTCTTCCGATCTCTCCTCTCTTAGCATTCGGTTCTC	56120339	56120382	56120256	56120278	56120390	56120413	56120256	56120413	84_40	40
X_105636609_105636652	29195	2	22	AC	X	44	CTACACGACGCTCTTCCGATCTTGCTTTGTTCTCTACTCCCTCCA	CAGACGTGTGCTCTTCCGATCTTAGACATAAGGGGGCACTACAGG	105636609	105636652	105636534	105636556	105636666	105636688	105636534	105636688	85_40	40
X_13457089_13457132	29196	2	22	AC	X	44	CTACACGACGCTCTTCCGATCTTGGTGCCAAGTAGAGGATAGGAG	CAGACGTGTGCTCTTCCGATCTGCTCCCAAGTCAAGGATCTGTTT	13457089	13457132	13456999	13457021	13457168	13457190	13456999	13457190	85_40	40
X_147217655_147217698	29197	2	22	AC	X	44	CTACACGACGCTCTTCCGATCTTGGTGTAATAGTGGGACTTCAGTG	CAGACGTGTGCTCTTCCGATCTTGCAAATGGACAAATGGGAAGGA	147217655	147217698	147217563	147217586	147217726	147217748	147217563	147217748	85_40	40
X_86168720_86168763	29198	2	22	AC	X	44	CTACACGACGCTCTTCCGATCTTGTAAAGTGTGCTGCACCAAGAT	CAGACGTGTGCTCTTCCGATCTGATTTTCTCTCCCCCAAGAAGCA	86168720	86168763	86168662	86168684	86168788	86168810	86168662	86168810	85_40	40
X_148059145_148059188	29199	2	22	AC	X	44	CTACACGACGCTCTTCCGATCTTGTCCACCTCTCATTGAAAACCA	CAGACGTGTGCTCTTCCGATCTATGAGCCTTAGGACAATGCTGTG	148059145	148059188	148059069	148059091	148059201	148059223	148059069	148059223	85_40	40
X_136236877_136236920	29200	2	22	AC	X	44	CTACACGACGCTCTTCCGATCTTGTCTTCTCCTTCCCCCTAACTG	CAGACGTGTGCTCTTCCGATCTACTGTCTCTTAGGGTCTGTGTGT	136236877	136236920	136236854	136236876	136236958	136236980	136236854	136236980	85_40	40
X_128811719_128811762	29201	2	22	AC	X	44	CTACACGACGCTCTTCCGATCTTGTGAGGGAACTACTGCCAACTA	CAGACGTGTGCTCTTCCGATCTTACCCAGCCAATGAGGACACATA	128811719	128811762	128811630	128811652	128811819	128811841	128811630	128811841	85_40	40
X_148123289_148123332	29202	2	22	AC	X	44	CTACACGACGCTCTTCCGATCTTTACCCAATTTGGCCTGTAGGTG	CAGACGTGTGCTCTTCCGATCTATTGTTGCTCAAAGTGGTGGGTA	148123289	148123332	148123261	148123283	148123356	148123378	148123261	148123378	85_40	40
X_64092210_64092253	29203	2	22	AC	X	44	CTACACGACGCTCTTCCGATCTTTCACCAAGTCCACTCAACACTG	CAGACGTGTGCTCTTCCGATCTCCCAAAATTTCACTGACACACACA	64092210	64092253	64092159	64092181	64092256	64092279	64092159	64092279	85_40	40
X_118598126_118598169	29204	2	22	AC	X	44	CTACACGACGCTCTTCCGATCTTTCTCTTTTGGTGTTAGGCCAGA	CAGACGTGTGCTCTTCCGATCTTGGGGAAAGTGATCCTGTCATCT	118598126	118598169	118598041	118598063	118598244	118598266	118598041	118598266	85_40	40
X_28422442_28422485	29205	2	22	AC	X	44	CTACACGACGCTCTTCCGATCTTTGCAAGTAGAAGCAAAACTGGC	CAGACGTGTGCTCTTCCGATCTACCTTTGAGCTATTGTACAACCT	28422442	28422485	28422393	28422415	28422554	28422576	28422393	28422576	85_40	40
X_107532473_107532516	29206	2	22	AC	X	44	CTACACGACGCTCTTCCGATCTTTGGGATAACGGGGAAGTTTGAC	CAGACGTGTGCTCTTCCGATCTACAAACTATTTGAGAGTGAGTTGCAG	107532473	107532516	107532391	107532413	107532580	107532605	107532391	107532605	85_40	40
X_36786368_36786411	29207	2	22	AC	X	44	CTACACGACGCTCTTCCGATCTTTTATCGTATGTTGAGCCCCTGC	CAGACGTGTGCTCTTCCGATCTTACATGGCTTGGTAGGGATGCTA	36786368	36786411	36786335	36786357	36786416	36786438	36786335	36786438	85_40	40
X_80065259_80065302	29448	2	22	AG	X	44	CTACACGACGCTCTTCCGATCTAATTCATCGCATCACGTTTCGAC	CAGACGTGTGCTCTTCCGATCTCTCTTCTCGCTCCGTCTATCTCT	80065259	80065302	80065116	80065138	80065340	80065362	80065116	80065362	97_40	40
X_15211739_15211782	29449	2	22	AG	X	44	CTACACGACGCTCTTCCGATCTAGCAGCCCCTAAAGAAAACTTCC	CAGACGTGTGCTCTTCCGATCTTTGCAAATTTCAAGCCAAGGGTG	15211739	15211782	15211695	15211717	15211816	15211838	15211695	15211838	97_40	40
X_65128979_65129022	29450	2	22	AG	X	44	CTACACGACGCTCTTCCGATCTATCCGTATGACTGCCTAGTGTCT	CAGACGTGTGCTCTTCCGATCTAAAAGAAATAAGACACCTCCCTGA	65128979	65129022	65128883	65128905	65129084	65129107	65128883	65129107	97_40	40
5_10508909_10508952	29882	2	22	AG	5	44	CTACACGACGCTCTTCCGATCTGGAGAATAAGCTCTTCAGTACCCC	CAGACGTGTGCTCTTCCGATCTGGGGAATTCCAGCTGATAGGGAA	10508909	10508952	10508821	10508844	10508953	10508975	10508821	10508975	107_40	40
X_109348979_109349022	29547	2	22	AG	X	44	CTACACGACGCTCTTCCGATCTGCAAGAACTTTTTCCTTCCTGGC	CAGACGTGTGCTCTTCCGATCTTCAGATGTCGCCAAGTTTCAAGA	109348979	109349022	109348851	109348873	109349079	109349101	109348851	109349101	120_40	40
X_7156220_7156263	29506	4	11	AGAT	X	44	CTACACGACGCTCTTCCGATCTCAGCAACATGGATGAAGTGTCCT	CAGACGTGTGCTCTTCCGATCTACGATGACTGGATAAAAACAATGTGC	7156220	7156263	7156072	7156094	7156266	7156291	7156072	7156291	98_40	40
X_83609939_83609980	66332	2	21	AT	X	42	CTACACGACGCTCTTCCGATCTACACTAGTAAGGTGGAACTGGGA	CAGACGTGTGCTCTTCCGATCTACACATTGATTTAGAGCTGGGGG	83609939	83609980	83609865	83609887	83610046	83610068	83609865	83610068	142_43	43
X_14294597_14294638	29213	2	21	AC	X	42	CTACACGACGCTCTTCCGATCTAAGTGTCTGCTAGATTGTCGGAT	CAGACGTGTGCTCTTCCGATCTTTGTAGAAAGGGTTGGCAGAAGG	14294597	14294638	14294535	14294557	14294716	14294738	14294535	14294738	145_42	42
X_77242941_77242982	29214	2	21	AC	X	42	CTACACGACGCTCTTCCGATCTAATCTTCTGACTCCCAACCCAGT	CAGACGTGTGCTCTTCCGATCTTGATTGCATCTCTTTGGCTGACA	77242941	77242982	77242915	77242937	77243007	77243029	77242915	77243029	145_42	42
X_110657926_110657967	29222	2	21	AC	X	42	CTACACGACGCTCTTCCGATCTACTCAGCTTAAAGAGCAGGGTCA	CAGACGTGTGCTCTTCCGATCTGTTTGCTTACTCTGTCCCACACA	110657926	110657967	110657820	110657842	110658026	110658048	110657820	110658048	145_42	42
X_34441763_34441804	29226	2	21	AC	X	42	CTACACGACGCTCTTCCGATCTAGAGCCGATAACGTTCCTACTGA	CAGACGTGTGCTCTTCCGATCTTACTCGGCTGGATTCAGTTTGTG	34441763	34441804	34441584	34441606	34441810	34441832	34441584	34441832	145_42	42
X_120296671_120296712	29254	2	21	AC	X	42	CTACACGACGCTCTTCCGATCTCCATGCTCCAGATGGATTCTTCC	CAGACGTGTGCTCTTCCGATCTTCACCTTGGAAGGTAGAGAGTGG	120296671	120296712	120296640	120296662	120296754	120296776	120296640	120296776	145_42	42
X_116848205_116848246	29284	2	21	AC	X	42	CTACACGACGCTCTTCCGATCTGGTCACGTCTAGGTTCAAAGCAT	CAGACGTGTGCTCTTCCGATCTGGAGGTGGGGAGGCATATGTATT	116848205	116848246	116848142	116848164	116848319	116848341	116848142	116848341	145_42	42
X_24536955_24536996	29302	2	21	AC	X	42	CTACACGACGCTCTTCCGATCTTCTACATCCATCCGTTTAGACAGT	CAGACGTGTGCTCTTCCGATCTTACTGTTCACACAGCATCTTGGC	24536955	24536996	24536893	24536916	24537064	24537086	24536893	24537086	145_42	42
X_76914973_76915014	29305	2	21	AC	X	42	CTACACGACGCTCTTCCGATCTTGAACACTTGTATCCCTTCTCCT	CAGACGTGTGCTCTTCCGATCTTCCGCGCTTAATATCACATGGTT	76914973	76915014	76914896	76914918	76915041	76915063	76914896	76915063	145_42	42
X_57534684_57534725	29312	2	21	AC	X	42	CTACACGACGCTCTTCCGATCTTGATTTCTGTGACTTGAAACTCTGA	CAGACGTGTGCTCTTCCGATCTCAAGAGGGAGGGACAGAGAGAAT	57534684	57534725	57534594	57534618	57534804	57534826	57534594	57534826	145_42	42
X_47919624_47919665	29326	2	21	AC	X	42	CTACACGACGCTCTTCCGATCTTTCAAGGCCTTTCACTCTGTCTG	CAGACGTGTGCTCTTCCGATCTTCTACAACAGCCACCTTCCTAGT	47919624	47919665	47919573	47919595	47919691	47919713	47919573	47919713	145_42	42
X_120725142_120725183	29330	2	21	AC	X	42	CTACACGACGCTCTTCCGATCTTTCTTCAGTCCCTGGTTCCTACC	CAGACGTGTGCTCTTCCGATCTGCCCTAGAGGAAGTTGGAAAACA	120725142	120725183	120725101	120725123	120725250	120725272	120725101	120725272	145_42	42
X_135425039_135425080	29208	2	21	AC	X	42	CTACACGACGCTCTTCCGATCTAAAGAGAGCTCAGTGTGTGTGTG	CAGACGTGTGCTCTTCCGATCTGGACCCCCTCTAATCTGTTCCAT	135425039	135425080	135425027	135425049	135425139	135425161	135425027	135425161	146_42	42
X_134102322_134102363	29209	2	21	AC	X	42	CTACACGACGCTCTTCCGATCTAAAGCAGATACCAGAACAGCAGG	CAGACGTGTGCTCTTCCGATCTAGGGACTTGGGGTGATCATTTCT	134102322	134102363	134102246	134102268	134102409	134102431	134102246	134102431	146_42	42
X_123694042_123694083	29225	2	21	AC	X	42	CTACACGACGCTCTTCCGATCTACTTCACTCCGGTTTCCAAAACA	CAGACGTGTGCTCTTCCGATCTAGACACACACTGTCTAATAGGGTT	123694042	123694083	123693962	123693984	123694150	123694173	123693962	123694173	146_42	42
X_121980079_121980120	29270	2	21	AC	X	42	CTACACGACGCTCTTCCGATCTGCCCAGCCTGTATTGCATTTTTC	CAGACGTGTGCTCTTCCGATCTAAGAAGTTGAGAGACTGCTTGGG	121980079	121980120	121980045	121980067	121980181	121980203	121980045	121980203	146_42	42
X_86688671_86688712	29276	2	21	AC	X	42	CTACACGACGCTCTTCCGATCTGGAAGCTCTGGTTAAGTGGTTGT	CAGACGTGTGCTCTTCCGATCTACAGGTGCACTTCTTCCTGAATC	86688671	86688712	86688588	86688610	86688776	86688798	86688588	86688798	146_42	42
X_71608446_71608487	29277	2	21	AC	X	42	CTACACGACGCTCTTCCGATCTGGAATCTAGAGGACCACAAAGGC	CAGACGTGTGCTCTTCCGATCTACGTGTGAATTGGGGTAGGAAGA	71608446	71608487	71608351	71608373	71608509	71608531	71608351	71608531	146_42	42
X_86306664_86306705	29287	2	21	AC	X	42	CTACACGACGCTCTTCCGATCTGTCAACCTTCAATATCTGTGTGAGC	CAGACGTGTGCTCTTCCGATCTGCTCCTTTGGAAGAAAGTTTGGC	86306664	86306705	86306579	86306603	86306745	86306767	86306579	86306767	146_42	42
X_30564942_30564983	29290	2	21	AC	X	42	CTACACGACGCTCTTCCGATCTGTGTACACCCAGGAGAAACTCAG	CAGACGTGTGCTCTTCCGATCTCACTGCTTTCACTAACTGTTGGC	30564942	30564983	30564867	30564889	30564995	30565017	30564867	30565017	146_42	42
X_3973991_3974032	29316	2	21	AC	X	42	CTACACGACGCTCTTCCGATCTTGGCAAGAACAGTATGGGGAAAC	CAGACGTGTGCTCTTCCGATCTTCAGATGGTTGTGAAGAAATTGCG	3973991	3974032	3973890	3973912	3974033	3974056	3973890	3974056	146_42	42
X_129238253_129238294	29319	2	21	AC	X	42	CTACACGACGCTCTTCCGATCTTGGTGAAGGACTAAAGAAGGCAA	CAGACGTGTGCTCTTCCGATCTAGCGGGAGATTTTCCAGGTTTTT	129238253	129238294	129238162	129238184	129238349	129238371	129238162	129238371	146_42	42
X_29087746_29087787	29324	2	21	AC	X	42	CTACACGACGCTCTTCCGATCTTGTCTTGAGCTGCAGATTGTTGT	CAGACGTGTGCTCTTCCGATCTTGGATGTTTGATAGGATTGCATGAC	29087746	29087787	29087651	29087673	29087840	29087864	29087651	29087864	146_42	42
X_35666894_35666935	29370	2	21	AC	X	42	CTACACGACGCTCTTCCGATCTAGCCTTTTCTGGCAATATGCTGA	CAGACGTGTGCTCTTCCGATCTCCACGGTAGAGTTGCAGATACAC	35666894	35666935	35666792	35666814	35667017	35667039	35666792	35667039	146_42	42
X_19119220_19119261	29230	2	21	AC	X	42	CTACACGACGCTCTTCCGATCTAGCTTGAGGTGTGTTTCAAATCAA	CAGACGTGTGCTCTTCCGATCTCACAAACCACTCCCAGAGAACAA	19119220	19119261	19119183	19119206	19119303	19119325	19119183	19119325	147_42	42
X_105144145_105144186	29235	2	21	AC	X	42	CTACACGACGCTCTTCCGATCTAGTATATTCCAGGAACTGCTGAAG	CAGACGTGTGCTCTTCCGATCTCTCCCTGTGCCTTAATTCCACTC	105144145	105144186	105144120	105144143	105144235	105144257	105144120	105144257	147_42	42
X_13552916_13552957	29260	2	21	AC	X	42	CTACACGACGCTCTTCCGATCTCTCATGTTTGGGGGAGAATGAGG	CAGACGTGTGCTCTTCCGATCTGTGCTTTTACCTAGTAACTGCTCA	13552916	13552957	13552862	13552884	13552987	13553010	13552862	13553010	147_42	42
X_139271053_139271094	29267	2	21	AC	X	42	CTACACGACGCTCTTCCGATCTGATACCTCAGCGCCCAAAGTTTA	CAGACGTGTGCTCTTCCGATCTTGTCACGTCTTAAAAGCCCCAAA	139271053	139271094	139270959	139270981	139271095	139271117	139270959	139271117	147_42	42
X_82779471_82779512	29269	2	21	AC	X	42	CTACACGACGCTCTTCCGATCTGATTCCCTACAGCAAGTGCTACC	CAGACGTGTGCTCTTCCGATCTTCCTCAAAACTTAGGATACCCCAT	82779471	82779512	82779423	82779445	82779521	82779544	82779423	82779544	147_42	42
X_4657181_4657222	29274	2	21	AC	X	42	CTACACGACGCTCTTCCGATCTGCTGGTCGTGTCATGGATTAAAA	CAGACGTGTGCTCTTCCGATCTTGCTGTAACTACCTGTTGCCTTC	4657181	4657222	4657079	4657101	4657242	4657264	4657079	4657264	147_42	42
X_74494611_74494652	29279	2	21	AC	X	42	CTACACGACGCTCTTCCGATCTGGCAAACTTTGGAGATTGGGGTA	CAGACGTGTGCTCTTCCGATCTCTCCCCACCCAAAGTGATGTTAG	74494611	74494652	74494574	74494596	74494696	74494718	74494574	74494718	147_42	42
X_21733381_21733422	29280	2	21	AC	X	42	CTACACGACGCTCTTCCGATCTGGCTGTTGTAACTCACTCTGCTC	CAGACGTGTGCTCTTCCGATCTCAGGAGATTTAATGTGCAGCCAC	21733381	21733422	21733358	21733380	21733486	21733508	21733358	21733508	147_42	42
X_154164257_154164298	29306	2	21	AC	X	42	CTACACGACGCTCTTCCGATCTTGAATAAGCCTAGAGAATGCCAA	CAGACGTGTGCTCTTCCGATCTATCTGGATGGCTTCAAGCTCTTT	154164257	154164298	154164230	154164252	154164311	154164333	154164230	154164333	147_42	42
X_24419232_24419273	29314	2	21	AC	X	42	CTACACGACGCTCTTCCGATCTTGCCCATAGCTGGTTTTGTGATT	CAGACGTGTGCTCTTCCGATCTATCTGCAGAAGAGGGGTGTGTAT	24419232	24419273	24419200	24419222	24419276	24419298	24419200	24419298	147_42	42
X_26394880_26394921	29331	2	21	AC	X	42	CTACACGACGCTCTTCCGATCTTTGAGCTCACACACAGACAAACC	CAGACGTGTGCTCTTCCGATCTTTGCTCTGATTTTACTGACTGGC	26394880	26394921	26394816	26394838	26394923	26394945	26394816	26394945	147_42	42
X_37660840_37660881	29336	2	21	AC	X	42	CTACACGACGCTCTTCCGATCTTTTCTGGACATCAATCTCCCCCA	CAGACGTGTGCTCTTCCGATCTGCCCCTTTGAACTCACCTCTTTT	37660840	37660881	37660812	37660834	37660959	37660981	37660812	37660981	147_42	42
X_17029181_17029222	29210	2	21	AC	X	42	CTACACGACGCTCTTCCGATCTAACAGCTCTCCAGGTGATTTTTGT	CAGACGTGTGCTCTTCCGATCTGTACAGCACCCTAGTTCAGATGC	17029181	17029222	17029098	17029121	17029237	17029259	17029098	17029259	148_42	42
X_11259652_11259693	29211	2	21	AC	X	42	CTACACGACGCTCTTCCGATCTAACGTATTCAAGCCCAAACTGGT	CAGACGTGTGCTCTTCCGATCTAGATTTCTTGAAGATGACACACGC	11259652	11259693	11259603	11259625	11259696	11259719	11259603	11259719	148_42	42
X_92520595_92520636	29217	2	21	AC	X	42	CTACACGACGCTCTTCCGATCTACAGAATTCTACTGCACTCCAGC	CAGACGTGTGCTCTTCCGATCTACCAAAGGAAAACCTTAGGCCAG	92520595	92520636	92520548	92520570	92520672	92520694	92520548	92520694	148_42	42
X_68028429_68028470	29244	2	21	AC	X	42	CTACACGACGCTCTTCCGATCTATTCCCATACCTCACTCAGGCTT	CAGACGTGTGCTCTTCCGATCTCCAGCAGATTCGGTGATAGATGG	68028429	68028470	68028375	68028397	68028536	68028558	68028375	68028558	148_42	42
X_34601516_34601557	29256	2	21	AC	X	42	CTACACGACGCTCTTCCGATCTCCCTGGAATCTACCCACTTACCA	CAGACGTGTGCTCTTCCGATCTTTGCCTTGTATACGTGTGTGTGT	34601516	34601557	34601489	34601511	34601573	34601595	34601489	34601595	148_42	42
X_21451772_21451813	29272	2	21	AC	X	42	CTACACGACGCTCTTCCGATCTGCTCTTTGTCTTTCATAAGAAACTCTG	CAGACGTGTGCTCTTCCGATCTAGGCCTCATGTTTTTAAAATGCC	21451772	21451813	21451682	21451708	21451830	21451852	21451682	21451852	148_42	42
X_64736517_64736558	29293	2	21	AC	X	42	CTACACGACGCTCTTCCGATCTTAGCCCTCATGGATTTCAGCAAC	CAGACGTGTGCTCTTCCGATCTGAGGGGCATTGACATAAGCAGAA	64736517	64736558	64736416	64736438	64736562	64736584	64736416	64736584	148_42	42
X_121242256_121242297	29294	2	21	AC	X	42	CTACACGACGCTCTTCCGATCTTAGGGCAATACTGCAAAGCATGT	CAGACGTGTGCTCTTCCGATCTCACATTGGCCTTTGAGTCTACCT	121242256	121242297	121242208	121242230	121242353	121242375	121242208	121242375	148_42	42
X_100802501_100802542	29311	2	21	AC	X	42	CTACACGACGCTCTTCCGATCTTGATCCTCAGACTATGCCCCTTT	CAGACGTGTGCTCTTCCGATCTAGACTCTTCTCTCGTGGTGGAAA	100802501	100802542	100802424	100802446	100802569	100802591	100802424	100802591	148_42	42
X_64629437_64629478	29315	2	21	AC	X	42	CTACACGACGCTCTTCCGATCTTGGCAACCAACTTGGAATGAAAG	CAGACGTGTGCTCTTCCGATCTTAGGATTGCTCACTGTTGGGATG	64629437	64629478	64629353	64629375	64629551	64629573	64629353	64629573	148_42	42
X_136508066_136508107	29323	2	21	AC	X	42	CTACACGACGCTCTTCCGATCTTGTATGCTTGCTGGGCACTAAAT	CAGACGTGTGCTCTTCCGATCTAAGACATGCCGGAGTGTTGTAAA	136508066	136508107	136507964	136507986	136508136	136508158	136507964	136508158	148_42	42
X_122424438_122424479	29329	2	21	AC	X	42	CTACACGACGCTCTTCCGATCTTTCTCTTGCTCCCTCTCCTCAAA	CAGACGTGTGCTCTTCCGATCTAGATCCTCTGCAGAAATGTAAAAGT	122424438	122424479	122424411	122424433	122424552	122424576	122424411	122424576	148_42	42
X_124121551_124121592	29216	2	21	AC	X	42	CTACACGACGCTCTTCCGATCTACACACAAGAAAGGACCAAGTGA	CAGACGTGTGCTCTTCCGATCTCAGCTGGATTTGAAGATAGTCCCA	124121551	124121592	124121455	124121477	124121625	124121648	124121455	124121648	149_42	42
X_127472749_127472790	29218	2	21	AC	X	42	CTACACGACGCTCTTCCGATCTACATCACTTGGTACAAGGCACAC	CAGACGTGTGCTCTTCCGATCTGTGCCTGAACTGGGATGTCAATA	127472749	127472790	127472719	127472741	127472853	127472875	127472719	127472875	149_42	42
X_31498672_31498713	29219	2	21	AC	X	42	CTACACGACGCTCTTCCGATCTACCCTAAAATCATGCTAGATACGTG	CAGACGTGTGCTCTTCCGATCTTCCCTTCAGGTCCAAACAGAGAA	31498672	31498713	31498583	31498607	31498791	31498813	31498583	31498813	149_42	42
X_18718360_18718401	29228	2	21	AC	X	42	CTACACGACGCTCTTCCGATCTAGCCTGGCCCTGTTCTAGTTATT	CAGACGTGTGCTCTTCCGATCTTGCAGAGGGCTGAAAGAAAAGAG	18718360	18718401	18718279	18718301	18718438	18718460	18718279	18718460	149_42	42
X_71364555_71364596	29236	2	21	AC	X	42	CTACACGACGCTCTTCCGATCTAGTCCGACTCTGTTCCAAAAACC	CAGACGTGTGCTCTTCCGATCTAAAGCTGGTCAAACACAGAACCT	71364555	71364596	71364460	71364482	71364619	71364641	71364460	71364641	149_42	42
X_36293531_36293572	29248	2	21	AC	X	42	CTACACGACGCTCTTCCGATCTCACCACAACTGACCTGAATTTTGT	CAGACGTGTGCTCTTCCGATCTAATTTCCAGAATGAATGAATGGTCA	36293531	36293572	36293475	36293498	36293628	36293652	36293475	36293652	149_42	42
X_49956263_49956304	29259	2	21	AC	X	42	CTACACGACGCTCTTCCGATCTCTCAGCTGTCAGATAGGTGTGTG	CAGACGTGTGCTCTTCCGATCTGGAGGCCAGCATTCATACATTCA	49956263	49956304	49956247	49956269	49956362	49956384	49956247	49956384	149_42	42
X_63421329_63421370	29283	2	21	AC	X	42	CTACACGACGCTCTTCCGATCTGGGGGTGCAGAGAGAGTTTAATG	CAGACGTGTGCTCTTCCGATCTTGCCCAGTTCTTTCTCAGGGATA	63421329	63421370	63421235	63421257	63421402	63421424	63421235	63421424	149_42	42
X_70881507_70881548	29296	2	21	AC	X	42	CTACACGACGCTCTTCCGATCTTCAAGGGAGAGCACCCTCAATTA	CAGACGTGTGCTCTTCCGATCTGCCAAGAGACTGGGTGTTGAATA	70881507	70881548	70881434	70881456	70881588	70881610	70881434	70881610	149_42	42
X_6058499_6058540	29303	2	21	AC	X	42	CTACACGACGCTCTTCCGATCTTCTCCTACCGGGTTTCCTTCAAT	CAGACGTGTGCTCTTCCGATCTAGGTAGGCATTGGTATGTGGTCT	6058499	6058540	6058461	6058483	6058544	6058566	6058461	6058566	149_42	42
X_112104015_112104056	29317	2	21	AC	X	42	CTACACGACGCTCTTCCGATCTTGGGAACAACCATTCAAACCACT	CAGACGTGTGCTCTTCCGATCTAGCCCCCAGAGAATCTGGTAAAA	112104015	112104056	112103989	112104011	112104102	112104124	112103989	112104124	149_42	42
X_16373177_16373218	29224	2	21	AC	X	42	CTACACGACGCTCTTCCGATCTACTGAACACTGATTGGATGGGTG	CAGACGTGTGCTCTTCCGATCTGCTCTTGCCCTCTTCTCTGGTTA	16373177	16373218	16373103	16373125	16373296	16373318	16373103	16373318	150_42	42
X_108223423_108223464	29229	2	21	AC	X	42	CTACACGACGCTCTTCCGATCTAGCTGCAATATCTTTAAAGCCTCCA	CAGACGTGTGCTCTTCCGATCTGTGGAGCCATAGAAAAAGAAATGCTC	108223423	108223464	108223374	108223398	108223514	108223539	108223374	108223539	150_42	42
X_105759163_105759204	29233	2	21	AC	X	42	CTACACGACGCTCTTCCGATCTAGGCTCTGTGTGTATGTTTGCAC	CAGACGTGTGCTCTTCCGATCTCCATTTCGTGGCCTCTTCCATTA	105759163	105759204	105759140	105759162	105759217	105759239	105759140	105759239	150_42	42
X_26471572_26471613	29247	2	21	AC	X	42	CTACACGACGCTCTTCCGATCTCACATACACACACATCCCGCATA	CAGACGTGTGCTCTTCCGATCTAGGCATTATGTGGGTGCCAATAG	26471572	26471613	26471499	26471521	26471647	26471669	26471499	26471669	150_42	42
X_10653918_10653959	29255	2	21	AC	X	42	CTACACGACGCTCTTCCGATCTCCCCTACACCCCACATACTCAT	CAGACGTGTGCTCTTCCGATCTTTGGATTTGTGTCTCTGCATCCC	10653918	10653959	10653896	10653917	10654001	10654023	10653896	10654023	150_42	42
X_125948926_125948967	29257	2	21	AC	X	42	CTACACGACGCTCTTCCGATCTCCTCACTTGGATGACTCAAGCTC	CAGACGTGTGCTCTTCCGATCTGCAATATGAGCCCAGCATTATCA	125948926	125948967	125948889	125948911	125949048	125949070	125948889	125949070	150_42	42
X_10561803_10561844	29258	2	21	AC	X	42	CTACACGACGCTCTTCCGATCTCTACCTCTGTCTCTGTCCCTCTG	CAGACGTGTGCTCTTCCGATCTTTTGCCTAGTATTGCTTTGGGGG	10561803	10561844	10561780	10561802	10561888	10561910	10561780	10561910	150_42	42
X_147921419_147921460	29263	2	21	AC	X	42	CTACACGACGCTCTTCCGATCTCTTCCCAGCTGCTTTTAATCCTG	CAGACGTGTGCTCTTCCGATCTACTATTTTACCTAGAAAATCCATTGGG	147921419	147921460	147921320	147921342	147921481	147921507	147921320	147921507	150_42	42
X_68160892_68160933	29264	2	21	AC	X	42	CTACACGACGCTCTTCCGATCTCTTCTAGGAAATGGCGCCTACC	CAGACGTGTGCTCTTCCGATCTACAGTGACACAACACACACATCA	68160892	68160933	68160753	68160774	68160964	68160986	68160753	68160986	150_42	42
X_130450985_130451026	29320	2	21	AC	X	42	CTACACGACGCTCTTCCGATCTTGGTGATAGCTGAAGAAACAGCA	CAGACGTGTGCTCTTCCGATCTATGCACGTGGTAGACACTCAGTA	130450985	130451026	130450956	130450978	130451072	130451094	130450956	130451094	150_42	42
X_146270502_146270543	29321	2	21	AC	X	42	CTACACGACGCTCTTCCGATCTTGGTGCTTGTCTTTCTCTTGCAT	CAGACGTGTGCTCTTCCGATCTCCCATTTTCTTTTGGTGACGCTT	146270502	146270543	146270434	146270456	146270582	146270604	146270434	146270604	150_42	42
X_78830183_78830224	29328	2	21	AC	X	42	CTACACGACGCTCTTCCGATCTTTCCTGTAATCACAACCCCTCCA	CAGACGTGTGCTCTTCCGATCTTCCAGGTTTAAGGATATGGCAAGT	78830183	78830224	78830160	78830182	78830278	78830301	78830160	78830301	150_42	42
X_123352159_123352200	29337	2	21	AC	X	42	CTACACGACGCTCTTCCGATCTTTTTGCATACTTACGGGAGGAGC	CAGACGTGTGCTCTTCCGATCTTCCAGAGGTGGCTAGAGTTGAAA	123352159	123352200	123352087	123352109	123352277	123352299	123352087	123352299	150_42	42
X_6399960_6400001	29227	2	21	AC	X	42	CTACACGACGCTCTTCCGATCTAGCCACCTGCTTCCTTAACAAAA	CAGACGTGTGCTCTTCCGATCTTTCCTGGGGGCCCTATTCATTTA	6399960	6400001	6399915	6399937	6400010	6400032	6399915	6400032	151_42	42
X_144342175_144342216	29234	2	21	AC	X	42	CTACACGACGCTCTTCCGATCTAGGTCCACAGCCAGATATTGAGA	CAGACGTGTGCTCTTCCGATCTCAGGTTGAGCAAGAGTCCAGAAA	144342175	144342216	144342073	144342095	144342296	144342318	144342073	144342318	151_42	42
X_95410308_95410349	29240	2	21	AC	X	42	CTACACGACGCTCTTCCGATCTATAGAGGTCCACAACATGAGGCT	CAGACGTGTGCTCTTCCGATCTAGACATACTGTTGAGAAAACTGCAA	95410308	95410349	95410235	95410257	95410350	95410374	95410235	95410374	151_42	42
X_134096896_134096937	29275	2	21	AC	X	42	CTACACGACGCTCTTCCGATCTGCTTTCCATTGAAGAGGATCCCA	CAGACGTGTGCTCTTCCGATCTGGGATAAGTATGGAGAGGCAGGT	134096896	134096937	134096867	134096889	134097012	134097034	134096867	134097034	151_42	42
X_146003984_146004025	29289	2	21	AC	X	42	CTACACGACGCTCTTCCGATCTGTGGCAGTGTATTTGTCAGGAGT	CAGACGTGTGCTCTTCCGATCTGACTTCCCAAGCCTCCACAATAA	146003984	146004025	146003934	146003956	146004092	146004114	146003934	146004114	151_42	42
X_86538502_86538543	29298	2	21	AC	X	42	CTACACGACGCTCTTCCGATCTTCATTATAACTCCACCCCGCCAT	CAGACGTGTGCTCTTCCGATCTCCCCAAGTAACCTCATAGGTTTGTAA	86538502	86538543	86538468	86538490	86538545	86538570	86538468	86538570	151_42	42
X_28322316_28322357	29304	2	21	AC	X	42	CTACACGACGCTCTTCCGATCTTCTTGAATGAAAGAAGCTCAAAAGAGT	CAGACGTGTGCTCTTCCGATCTTGTGACCTTGGGCTTTCACTTAC	28322316	28322357	28322227	28322253	28322414	28322436	28322227	28322436	151_42	42
X_82815936_82815977	29322	2	21	AC	X	42	CTACACGACGCTCTTCCGATCTTGTAATTCCTCCTGAAACTGCCT	CAGACGTGTGCTCTTCCGATCTTCTTGAGTCTCGCCACAGTAGAA	82815936	82815977	82815905	82815927	82815998	82816020	82815905	82816020	151_42	42
X_30050509_30050550	29327	2	21	AC	X	42	CTACACGACGCTCTTCCGATCTTTCCCCAGTACCCATGAAGGTTT	CAGACGTGTGCTCTTCCGATCTACAGACTAAGACGAGGGTGTGTA	30050509	30050550	30050455	30050477	30050551	30050573	30050455	30050573	151_42	42
X_45668291_45668332	29332	2	21	AC	X	42	CTACACGACGCTCTTCCGATCTTTGCATACTCCTCCACAAACTGT	CAGACGTGTGCTCTTCCGATCTCATGCCTTATGGCGTTCAGAAAC	45668291	45668332	45668256	45668278	45668348	45668370	45668256	45668370	151_42	42
X_65830115_65830156	29221	2	21	AC	X	42	CTACACGACGCTCTTCCGATCTACGACAACCACCTTATGAGAAACT	CAGACGTGTGCTCTTCCGATCTATGGTGACAAGCACTACACACAA	65830115	65830156	65830016	65830039	65830184	65830206	65830016	65830206	152_42	42
X_27645655_27645696	29242	2	21	AC	X	42	CTACACGACGCTCTTCCGATCTATCCCATCACCACACTCAAGGTA	CAGACGTGTGCTCTTCCGATCTTGCCCGGCCCATATTATGTATTC	27645655	27645696	27645556	27645578	27645717	27645739	27645556	27645739	152_42	42
X_29467856_29467897	29252	2	21	AC	X	42	CTACACGACGCTCTTCCGATCTCAGTGGAGAAACCAACTGGTGAA	CAGACGTGTGCTCTTCCGATCTTAGATAGAACACTGGAACACAGC	29467856	29467897	29467779	29467801	29467958	29467980	29467779	29467980	152_42	42
X_116899073_116899114	29266	2	21	AC	X	42	CTACACGACGCTCTTCCGATCTGAGTTTCATTGCCACAAAGGTCC	CAGACGTGTGCTCTTCCGATCTCTGCTGCCACTTTTCTGACTCTT	116899073	116899114	116899045	116899067	116899164	116899186	116899045	116899186	152_42	42
X_111534596_111534637	29268	2	21	AC	X	42	CTACACGACGCTCTTCCGATCTGATGAGTGTTGGCTGTGTCTCTT	CAGACGTGTGCTCTTCCGATCTTTTCTTCTCTTTTCCACCCCACC	111534596	111534637	111534509	111534531	111534657	111534679	111534509	111534679	152_42	42
X_127476657_127476698	29273	2	21	AC	X	42	CTACACGACGCTCTTCCGATCTGCTGAGTATAAAAAGCATGCCCC	CAGACGTGTGCTCTTCCGATCTATGCCTGGTACCAATATGTCTGC	127476657	127476698	127476629	127476651	127476716	127476738	127476629	127476738	152_42	42
X_79398617_79398658	29313	2	21	AC	X	42	CTACACGACGCTCTTCCGATCTTGCAGTAGACAACAGCTCCATTC	CAGACGTGTGCTCTTCCGATCTCACTGGGGAGTTAAGGGGAAAAC	79398617	79398658	79398538	79398560	79398691	79398713	79398538	79398713	152_42	42
X_85934620_85934661	29335	2	21	AC	X	42	CTACACGACGCTCTTCCGATCTTTTCAGTGCCAGGCATAGGTTTT	CAGACGTGTGCTCTTCCGATCTGACTTGTTTCCAAGGCTGACAAC	85934620	85934661	85934566	85934588	85934689	85934711	85934566	85934711	152_42	42
X_23412527_23412568	29231	2	21	AC	X	42	CTACACGACGCTCTTCCGATCTAGGAAAGGACAGTGGGGAGAAAT	CAGACGTGTGCTCTTCCGATCTCTGCAGTTTGGATAAGGCAGGAT	23412527	23412568	23412441	23412463	23412631	23412653	23412441	23412653	153_42	42
X_7399303_7399344	29232	2	21	AC	X	42	CTACACGACGCTCTTCCGATCTAGGCACATGTCCTCTTCAAAT	CAGACGTGTGCTCTTCCGATCTAGGGAACACTAATTTTCTTTCCTGA	7399303	7399344	7399282	7399302	7399421	7399445	7399282	7399445	153_42	42
X_147916030_147916071	29238	2	21	AC	X	42	CTACACGACGCTCTTCCGATCTAGTGCTTCCTTGTGGAAGTTCAG	CAGACGTGTGCTCTTCCGATCTCCCAAAATGTTGCCACAGCTTTAT	147916030	147916071	147915995	147916017	147916145	147916168	147915995	147916168	153_42	42
X_76340309_76340350	29243	2	21	AC	X	42	CTACACGACGCTCTTCCGATCTATGGTGCTGTTTTAAGCCCTTCC	CAGACGTGTGCTCTTCCGATCTACCTCCCACCCCTAAAACATACA	76340309	76340350	76340275	76340297	76340354	76340376	76340275	76340376	153_42	42
X_110340098_110340139	29249	2	21	AC	X	42	CTACACGACGCTCTTCCGATCTCAGCAGTTCCCTAGAAAAGGGGA	CAGACGTGTGCTCTTCCGATCTCGCCCGTTTAAGAAAATCGTCAC	110340098	110340139	110340023	110340045	110340155	110340177	110340023	110340177	153_42	42
X_110713327_110713368	29250	2	21	AC	X	42	CTACACGACGCTCTTCCGATCTCAGGAACCTGATCACTTATCCCTA	CAGACGTGTGCTCTTCCGATCTAGAGTATGATCCCTGTTTGAGGA	110713327	110713368	110713284	110713307	110713373	110713395	110713284	110713395	153_42	42
X_102250227_102250268	29265	2	21	AC	X	42	CTACACGACGCTCTTCCGATCTCTTGCAGACTCCAGGGATTTCTC	CAGACGTGTGCTCTTCCGATCTCCAAGCCATGCCAAATTGTTGAT	102250227	102250268	102250167	102250189	102250291	102250313	102250167	102250313	153_42	42
X_147656465_147656506	29282	2	21	AC	X	42	CTACACGACGCTCTTCCGATCTGGGATGATGAAACTGAGAGTCTG	CAGACGTGTGCTCTTCCGATCTCTTAGTGCTTCTCTTGTCCCAGG	147656465	147656506	147656363	147656385	147656536	147656558	147656363	147656558	153_42	42
X_127458437_127458478	29291	2	21	AC	X	42	CTACACGACGCTCTTCCGATCTGTGTTACAAAATGTGTGCTGGGG	CAGACGTGTGCTCTTCCGATCTTCTCAGACTTAGACTTCTTCCTGC	127458437	127458478	127458409	127458431	127458479	127458502	127458409	127458502	153_42	42
X_43361593_43361634	29310	2	21	AC	X	42	CTACACGACGCTCTTCCGATCTTGAGAATTGAAAGCACAGCCCAT	CAGACGTGTGCTCTTCCGATCTAGGTCCATGTCACAGAATTGCTC	43361593	43361634	43361549	43361571	43361703	43361725	43361549	43361725	153_42	42
X_17575231_17575272	29215	2	21	AC	X	42	CTACACGACGCTCTTCCGATCTACAAAGCTATTTGTTGTTAAGGGGG	CAGACGTGTGCTCTTCCGATCTGACTGCCAAGGTAACCATCAGAG	17575231	17575272	17575202	17575226	17575306	17575328	17575202	17575328	154_42	42
X_20338296_20338337	29220	2	21	AC	X	42	CTACACGACGCTCTTCCGATCTACCTCATTTACTTTAGATCTGCCTGT	CAGACGTGTGCTCTTCCGATCTTGCATCAGAAAAGCATTGTGTGT	20338296	20338337	20338259	20338284	20338342	20338364	20338259	20338364	154_42	42
X_110809926_110809967	29237	2	21	AC	X	42	CTACACGACGCTCTTCCGATCTAGTGACACTTGCTGGGTTGTAAG	CAGACGTGTGCTCTTCCGATCTAACTCACGTGTGCCAGAACTATC	110809926	110809967	110809840	110809862	110810037	110810059	110809840	110810059	154_42	42
X_68132916_68132957	29245	2	21	AC	X	42	CTACACGACGCTCTTCCGATCTCAACAATCTCCCCTGACACACAC	CAGACGTGTGCTCTTCCGATCTTCCATTTAGTTGGTTCTGGGCTG	68132916	68132957	68132901	68132923	68133036	68133058	68132901	68133058	154_42	42
X_149316228_149316269	29261	2	21	AC	X	42	CTACACGACGCTCTTCCGATCTCTCCAGGAATGTATCTCCCCTGT	CAGACGTGTGCTCTTCCGATCTCGTTGTATTTGTTACAGCAGCCC	149316228	149316269	149316164	149316186	149316282	149316304	149316164	149316304	154_42	42
X_77855126_77855167	29271	2	21	AC	X	42	CTACACGACGCTCTTCCGATCTGCTCAGAGCCAAATCAAGAAAGAG	CAGACGTGTGCTCTTCCGATCTCTAGGTGTGTTCCTAGGGGAAGG	77855126	77855167	77855083	77855106	77855168	77855190	77855083	77855190	154_42	42
X_147781944_147781985	29285	2	21	AC	X	42	CTACACGACGCTCTTCCGATCTGGTGGAGTTACCCAAGGGAGTAT	CAGACGTGTGCTCTTCCGATCTAAACATGGTGGGCACTTCAGAAT	147781944	147781985	147781880	147781902	147782006	147782028	147781880	147782028	154_42	42
X_81515545_81515586	29286	2	21	AC	X	42	CTACACGACGCTCTTCCGATCTGGTGTGCAATTCTTTTGATGTACCA	CAGACGTGTGCTCTTCCGATCTTGATGACATCCCTCTCAACGTCA	81515545	81515586	81515450	81515474	81515662	81515684	81515450	81515684	154_42	42
X_111985214_111985255	29295	2	21	AC	X	42	CTACACGACGCTCTTCCGATCTTAGTGTACCTCAGAGCTGTAGCC	CAGACGTGTGCTCTTCCGATCTAGTCAAGGTTTGGCCTGTGTAAG	111985214	111985255	111985187	111985209	111985319	111985341	111985187	111985341	154_42	42
X_125037832_125037873	29297	2	21	AC	X	42	CTACACGACGCTCTTCCGATCTTCAGAGTTTTTCAGGGAAACAAAACC	CAGACGTGTGCTCTTCCGATCTGCCAAAATCTACAACTACATGAGCA	125037832	125037873	125037789	125037814	125037931	125037955	125037789	125037955	154_42	42
X_77377907_77377948	29299	2	21	AC	X	42	CTACACGACGCTCTTCCGATCTTCCCACAATTAGCAATCGTGCTT	CAGACGTGTGCTCTTCCGATCTAGGGCTCAGAAGACCTACTCTTG	77377907	77377948	77377852	77377874	77377994	77378016	77377852	77378016	154_42	42
X_99328573_99328614	29301	2	21	AC	X	42	CTACACGACGCTCTTCCGATCTTCCTTAGGTATACCACACAGCCT	CAGACGTGTGCTCTTCCGATCTAGAAGCAGCAGGATAGTGAAGGA	99328573	99328614	99328545	99328567	99328680	99328702	99328545	99328702	154_42	42
X_148212630_148212671	29325	2	21	AC	X	42	CTACACGACGCTCTTCCGATCTTGTTGTCAAGTTGAACACGATTGC	CAGACGTGTGCTCTTCCGATCTGGAAGGGCAGGCCTATTCTAAAC	148212630	148212671	148212550	148212573	148212687	148212709	148212550	148212709	154_42	42
X_144956620_144956661	29333	2	21	AC	X	42	CTACACGACGCTCTTCCGATCTTTGTTAGAACACAGAGCATGGAT	CAGACGTGTGCTCTTCCGATCTTTGTTATGGGGCACAACACTGTA	144956620	144956661	144956523	144956545	144956673	144956695	144956523	144956695	154_42	42
X_35296123_35296164	29212	2	21	AC	X	42	CTACACGACGCTCTTCCGATCTAAGAGCATGCTAAAGTCTCCCAC	CAGACGTGTGCTCTTCCGATCTAAACCATTACAGTAGCCAGTTCA	35296123	35296164	35296048	35296070	35296218	35296240	35296048	35296240	155_42	42
X_152632187_152632228	29239	2	21	AC	X	42	CTACACGACGCTCTTCCGATCTATAATGAACCTCCACGTACCCAC	CAGACGTGTGCTCTTCCGATCTAGTAAAGCACAGTGTGAGTAGCA	152632187	152632228	152632118	152632140	152632254	152632276	152632118	152632276	155_42	42
X_123798530_123798571	29241	2	21	AC	X	42	CTACACGACGCTCTTCCGATCTATAGGTCCACAATGAAAGGTGGC	CAGACGTGTGCTCTTCCGATCTCCCTCCTCCACAAAGCAAAAGAT	123798530	123798571	123798449	123798471	123798572	123798594	123798449	123798594	155_42	42
X_43463783_43463824	29246	2	21	AC	X	42	CTACACGACGCTCTTCCGATCTCACACTGCTCTGTGGACTTAACA	CAGACGTGTGCTCTTCCGATCTCTAGAGAGACAGAGCCACAAGGA	43463783	43463824	43463728	43463750	43463826	43463848	43463728	43463848	155_42	42
X_130958833_130958874	29253	2	21	AC	X	42	CTACACGACGCTCTTCCGATCTCCACATTCCTCAGCACAATGCTA	CAGACGTGTGCTCTTCCGATCTTGTGTAGTGGGACCAATGAGGAT	130958833	130958874	130958794	130958816	130958899	130958921	130958794	130958921	155_42	42
X_119134204_119134245	29262	2	21	AC	X	42	CTACACGACGCTCTTCCGATCTCTCTAGCTCCTGGTTCGAGTTCC	CAGACGTGTGCTCTTCCGATCTGACTTTACCGCCACCTTCCTG	119134204	119134245	119134103	119134125	119134280	119134300	119134103	119134300	155_42	42
X_136487523_136487564	29278	2	21	AC	X	42	CTACACGACGCTCTTCCGATCTGGAGGGCGAGAAACATCAGAAAA	CAGACGTGTGCTCTTCCGATCTATCATCCAGAGTCAACTACCCCC	136487523	136487564	136487477	136487499	136487645	136487667	136487477	136487667	155_42	42
X_31293273_31293314	29281	2	21	AC	X	42	CTACACGACGCTCTTCCGATCTGGGAAAGGTGATTAGTTTGGCCT	CAGACGTGTGCTCTTCCGATCTGAGCGATTAGCTCACAGAGTCAA	31293273	31293314	31293173	31293195	31293358	31293380	31293173	31293380	155_42	42
X_101198490_101198531	29288	2	21	AC	X	42	CTACACGACGCTCTTCCGATCTGTGATAAGTCTCTTTCTCTTCCCCC	CAGACGTGTGCTCTTCCGATCTCTCCAGCAGCCAAAGTACTGAAT	101198490	101198531	101198455	101198479	101198573	101198595	101198455	101198595	155_42	42
X_28097390_28097431	29300	2	21	AC	X	42	CTACACGACGCTCTTCCGATCTTCCTCTTCCAGGTATAATGGGGC	CAGACGTGTGCTCTTCCGATCTCTGTCCTTCAACTATTGGCCACC	28097390	28097431	28097355	28097377	28097473	28097495	28097355	28097495	155_42	42
X_127246929_127246970	29307	2	21	AC	X	42	CTACACGACGCTCTTCCGATCTTGAATTATCCCAGTGCCTGTGTG	CAGACGTGTGCTCTTCCGATCTTCCCCAAGGATTAGTTTTGAGGC	127246929	127246970	127246900	127246922	127247043	127247065	127246900	127247065	155_42	42
X_138476367_138476408	29318	2	21	AC	X	42	CTACACGACGCTCTTCCGATCTTGGGCACATCTGAAATGTAGAGC	CAGACGTGTGCTCTTCCGATCTACATACCTACACACATTCATACACA	138476367	138476408	138476310	138476332	138476417	138476441	138476310	138476441	155_42	42
X_69448125_69448166	29334	2	21	AC	X	42	CTACACGACGCTCTTCCGATCTTTTCACTCCTGCAGCTATCACAC	CAGACGTGTGCTCTTCCGATCTATACCCAAGTTACCCTACCTGCC	69448125	69448166	69448057	69448079	69448236	69448258	69448057	69448258	155_42	42
X_46060654_46060695	29292	2	21	AC	X	42	CTACACGACGCTCTTCCGATCTTAGAGGAGGCAAGGTGAGGTATG	CAGACGTGTGCTCTTCCGATCTAGCATTTACTGGTGCTCATGTCA	46060654	46060695	46060552	46060574	46060757	46060779	46060552	46060779	156_42	11
X_99173346_99173387	29118	2	21	AC	X	42	CTACACGACGCTCTTCCGATCTAACCTCCTTTTCACACACACACA	CAGACGTGTGCTCTTCCGATCTACATTGACCTCTCTCTTTCCCCA	99173346	99173387	99173335	99173357	99173481	99173503	99173335	99173503	83_40	40
X_135425039_135425080	29208	2	21	AC	X	42	CTACACGACGCTCTTCCGATCTAAAGAGAGCTCAGTGTGTGTGTG	CAGACGTGTGCTCTTCCGATCTGGACCCCCTCTAATCTGTTCCAT	135425039	135425080	135425027	135425049	135425139	135425161	135425027	135425161	85_40	40
X_134102322_134102363	29209	2	21	AC	X	42	CTACACGACGCTCTTCCGATCTAAAGCAGATACCAGAACAGCAGG	CAGACGTGTGCTCTTCCGATCTAGGGACTTGGGGTGATCATTTCT	134102322	134102363	134102246	134102268	134102409	134102431	134102246	134102431	85_40	40
X_17029181_17029222	29210	2	21	AC	X	42	CTACACGACGCTCTTCCGATCTAACAGCTCTCCAGGTGATTTTTGT	CAGACGTGTGCTCTTCCGATCTGTACAGCACCCTAGTTCAGATGC	17029181	17029222	17029098	17029121	17029237	17029259	17029098	17029259	85_40	40
X_11259652_11259693	29211	2	21	AC	X	42	CTACACGACGCTCTTCCGATCTAACGTATTCAAGCCCAAACTGGT	CAGACGTGTGCTCTTCCGATCTAGATTTCTTGAAGATGACACACGC	11259652	11259693	11259603	11259625	11259696	11259719	11259603	11259719	85_40	40
X_35296123_35296164	29212	2	21	AC	X	42	CTACACGACGCTCTTCCGATCTAAGAGCATGCTAAAGTCTCCCAC	CAGACGTGTGCTCTTCCGATCTAAACCATTACAGTAGCCAGTTCA	35296123	35296164	35296048	35296070	35296218	35296240	35296048	35296240	85_40	40
X_14294597_14294638	29213	2	21	AC	X	42	CTACACGACGCTCTTCCGATCTAAGTGTCTGCTAGATTGTCGGAT	CAGACGTGTGCTCTTCCGATCTTTGTAGAAAGGGTTGGCAGAAGG	14294597	14294638	14294535	14294557	14294716	14294738	14294535	14294738	85_40	40
X_77242941_77242982	29214	2	21	AC	X	42	CTACACGACGCTCTTCCGATCTAATCTTCTGACTCCCAACCCAGT	CAGACGTGTGCTCTTCCGATCTTGATTGCATCTCTTTGGCTGACA	77242941	77242982	77242915	77242937	77243007	77243029	77242915	77243029	85_40	40
X_17575231_17575272	29215	2	21	AC	X	42	CTACACGACGCTCTTCCGATCTACAAAGCTATTTGTTGTTAAGGGGG	CAGACGTGTGCTCTTCCGATCTGACTGCCAAGGTAACCATCAGAG	17575231	17575272	17575202	17575226	17575306	17575328	17575202	17575328	85_40	40
X_124121551_124121592	29216	2	21	AC	X	42	CTACACGACGCTCTTCCGATCTACACACAAGAAAGGACCAAGTGA	CAGACGTGTGCTCTTCCGATCTCAGCTGGATTTGAAGATAGTCCCA	124121551	124121592	124121455	124121477	124121625	124121648	124121455	124121648	85_40	40
X_92520595_92520636	29217	2	21	AC	X	42	CTACACGACGCTCTTCCGATCTACAGAATTCTACTGCACTCCAGC	CAGACGTGTGCTCTTCCGATCTACCAAAGGAAAACCTTAGGCCAG	92520595	92520636	92520548	92520570	92520672	92520694	92520548	92520694	85_40	40
X_127472749_127472790	29218	2	21	AC	X	42	CTACACGACGCTCTTCCGATCTACATCACTTGGTACAAGGCACAC	CAGACGTGTGCTCTTCCGATCTGTGCCTGAACTGGGATGTCAATA	127472749	127472790	127472719	127472741	127472853	127472875	127472719	127472875	85_40	40
X_31498672_31498713	29219	2	21	AC	X	42	CTACACGACGCTCTTCCGATCTACCCTAAAATCATGCTAGATACGTG	CAGACGTGTGCTCTTCCGATCTTCCCTTCAGGTCCAAACAGAGAA	31498672	31498713	31498583	31498607	31498791	31498813	31498583	31498813	85_40	40
X_20338296_20338337	29220	2	21	AC	X	42	CTACACGACGCTCTTCCGATCTACCTCATTTACTTTAGATCTGCCTGT	CAGACGTGTGCTCTTCCGATCTTGCATCAGAAAAGCATTGTGTGT	20338296	20338337	20338259	20338284	20338342	20338364	20338259	20338364	85_40	40
X_65830115_65830156	29221	2	21	AC	X	42	CTACACGACGCTCTTCCGATCTACGACAACCACCTTATGAGAAACT	CAGACGTGTGCTCTTCCGATCTATGGTGACAAGCACTACACACAA	65830115	65830156	65830016	65830039	65830184	65830206	65830016	65830206	85_40	40
X_110657926_110657967	29222	2	21	AC	X	42	CTACACGACGCTCTTCCGATCTACTCAGCTTAAAGAGCAGGGTCA	CAGACGTGTGCTCTTCCGATCTGTTTGCTTACTCTGTCCCACACA	110657926	110657967	110657820	110657842	110658026	110658048	110657820	110658048	85_40	40
X_16373177_16373218	29224	2	21	AC	X	42	CTACACGACGCTCTTCCGATCTACTGAACACTGATTGGATGGGTG	CAGACGTGTGCTCTTCCGATCTGCTCTTGCCCTCTTCTCTGGTTA	16373177	16373218	16373103	16373125	16373296	16373318	16373103	16373318	85_40	40
X_123694042_123694083	29225	2	21	AC	X	42	CTACACGACGCTCTTCCGATCTACTTCACTCCGGTTTCCAAAACA	CAGACGTGTGCTCTTCCGATCTAGACACACACTGTCTAATAGGGTT	123694042	123694083	123693962	123693984	123694150	123694173	123693962	123694173	85_40	40
X_34441763_34441804	29226	2	21	AC	X	42	CTACACGACGCTCTTCCGATCTAGAGCCGATAACGTTCCTACTGA	CAGACGTGTGCTCTTCCGATCTTACTCGGCTGGATTCAGTTTGTG	34441763	34441804	34441584	34441606	34441810	34441832	34441584	34441832	85_40	40
X_6399960_6400001	29227	2	21	AC	X	42	CTACACGACGCTCTTCCGATCTAGCCACCTGCTTCCTTAACAAAA	CAGACGTGTGCTCTTCCGATCTTTCCTGGGGGCCCTATTCATTTA	6399960	6400001	6399915	6399937	6400010	6400032	6399915	6400032	85_40	40
X_18718360_18718401	29228	2	21	AC	X	42	CTACACGACGCTCTTCCGATCTAGCCTGGCCCTGTTCTAGTTATT	CAGACGTGTGCTCTTCCGATCTTGCAGAGGGCTGAAAGAAAAGAG	18718360	18718401	18718279	18718301	18718438	18718460	18718279	18718460	85_40	40
X_108223423_108223464	29229	2	21	AC	X	42	CTACACGACGCTCTTCCGATCTAGCTGCAATATCTTTAAAGCCTCCA	CAGACGTGTGCTCTTCCGATCTGTGGAGCCATAGAAAAAGAAATGCTC	108223423	108223464	108223374	108223398	108223514	108223539	108223374	108223539	85_40	40
X_19119220_19119261	29230	2	21	AC	X	42	CTACACGACGCTCTTCCGATCTAGCTTGAGGTGTGTTTCAAATCAA	CAGACGTGTGCTCTTCCGATCTCACAAACCACTCCCAGAGAACAA	19119220	19119261	19119183	19119206	19119303	19119325	19119183	19119325	85_40	40
X_23412527_23412568	29231	2	21	AC	X	42	CTACACGACGCTCTTCCGATCTAGGAAAGGACAGTGGGGAGAAAT	CAGACGTGTGCTCTTCCGATCTCTGCAGTTTGGATAAGGCAGGAT	23412527	23412568	23412441	23412463	23412631	23412653	23412441	23412653	85_40	40
X_7399303_7399344	29232	2	21	AC	X	42	CTACACGACGCTCTTCCGATCTAGGCACATGTCCTCTTCAAAT	CAGACGTGTGCTCTTCCGATCTAGGGAACACTAATTTTCTTTCCTGA	7399303	7399344	7399282	7399302	7399421	7399445	7399282	7399445	85_40	40
X_105759163_105759204	29233	2	21	AC	X	42	CTACACGACGCTCTTCCGATCTAGGCTCTGTGTGTATGTTTGCAC	CAGACGTGTGCTCTTCCGATCTCCATTTCGTGGCCTCTTCCATTA	105759163	105759204	105759140	105759162	105759217	105759239	105759140	105759239	85_40	40
X_144342175_144342216	29234	2	21	AC	X	42	CTACACGACGCTCTTCCGATCTAGGTCCACAGCCAGATATTGAGA	CAGACGTGTGCTCTTCCGATCTCAGGTTGAGCAAGAGTCCAGAAA	144342175	144342216	144342073	144342095	144342296	144342318	144342073	144342318	85_40	40
X_105144145_105144186	29235	2	21	AC	X	42	CTACACGACGCTCTTCCGATCTAGTATATTCCAGGAACTGCTGAAG	CAGACGTGTGCTCTTCCGATCTCTCCCTGTGCCTTAATTCCACTC	105144145	105144186	105144120	105144143	105144235	105144257	105144120	105144257	86_40	40
X_71364555_71364596	29236	2	21	AC	X	42	CTACACGACGCTCTTCCGATCTAGTCCGACTCTGTTCCAAAAACC	CAGACGTGTGCTCTTCCGATCTAAAGCTGGTCAAACACAGAACCT	71364555	71364596	71364460	71364482	71364619	71364641	71364460	71364641	86_40	40
X_110809926_110809967	29237	2	21	AC	X	42	CTACACGACGCTCTTCCGATCTAGTGACACTTGCTGGGTTGTAAG	CAGACGTGTGCTCTTCCGATCTAACTCACGTGTGCCAGAACTATC	110809926	110809967	110809840	110809862	110810037	110810059	110809840	110810059	86_40	40
X_147916030_147916071	29238	2	21	AC	X	42	CTACACGACGCTCTTCCGATCTAGTGCTTCCTTGTGGAAGTTCAG	CAGACGTGTGCTCTTCCGATCTCCCAAAATGTTGCCACAGCTTTAT	147916030	147916071	147915995	147916017	147916145	147916168	147915995	147916168	86_40	40
X_152632187_152632228	29239	2	21	AC	X	42	CTACACGACGCTCTTCCGATCTATAATGAACCTCCACGTACCCAC	CAGACGTGTGCTCTTCCGATCTAGTAAAGCACAGTGTGAGTAGCA	152632187	152632228	152632118	152632140	152632254	152632276	152632118	152632276	86_40	40
X_95410308_95410349	29240	2	21	AC	X	42	CTACACGACGCTCTTCCGATCTATAGAGGTCCACAACATGAGGCT	CAGACGTGTGCTCTTCCGATCTAGACATACTGTTGAGAAAACTGCAA	95410308	95410349	95410235	95410257	95410350	95410374	95410235	95410374	86_40	40
X_123798530_123798571	29241	2	21	AC	X	42	CTACACGACGCTCTTCCGATCTATAGGTCCACAATGAAAGGTGGC	CAGACGTGTGCTCTTCCGATCTCCCTCCTCCACAAAGCAAAAGAT	123798530	123798571	123798449	123798471	123798572	123798594	123798449	123798594	86_40	40
X_27645655_27645696	29242	2	21	AC	X	42	CTACACGACGCTCTTCCGATCTATCCCATCACCACACTCAAGGTA	CAGACGTGTGCTCTTCCGATCTTGCCCGGCCCATATTATGTATTC	27645655	27645696	27645556	27645578	27645717	27645739	27645556	27645739	86_40	40
X_76340309_76340350	29243	2	21	AC	X	42	CTACACGACGCTCTTCCGATCTATGGTGCTGTTTTAAGCCCTTCC	CAGACGTGTGCTCTTCCGATCTACCTCCCACCCCTAAAACATACA	76340309	76340350	76340275	76340297	76340354	76340376	76340275	76340376	86_40	40
X_68028429_68028470	29244	2	21	AC	X	42	CTACACGACGCTCTTCCGATCTATTCCCATACCTCACTCAGGCTT	CAGACGTGTGCTCTTCCGATCTCCAGCAGATTCGGTGATAGATGG	68028429	68028470	68028375	68028397	68028536	68028558	68028375	68028558	86_40	40
X_68132916_68132957	29245	2	21	AC	X	42	CTACACGACGCTCTTCCGATCTCAACAATCTCCCCTGACACACAC	CAGACGTGTGCTCTTCCGATCTTCCATTTAGTTGGTTCTGGGCTG	68132916	68132957	68132901	68132923	68133036	68133058	68132901	68133058	86_40	40
X_43463783_43463824	29246	2	21	AC	X	42	CTACACGACGCTCTTCCGATCTCACACTGCTCTGTGGACTTAACA	CAGACGTGTGCTCTTCCGATCTCTAGAGAGACAGAGCCACAAGGA	43463783	43463824	43463728	43463750	43463826	43463848	43463728	43463848	86_40	40
X_26471572_26471613	29247	2	21	AC	X	42	CTACACGACGCTCTTCCGATCTCACATACACACACATCCCGCATA	CAGACGTGTGCTCTTCCGATCTAGGCATTATGTGGGTGCCAATAG	26471572	26471613	26471499	26471521	26471647	26471669	26471499	26471669	86_40	40
X_36293531_36293572	29248	2	21	AC	X	42	CTACACGACGCTCTTCCGATCTCACCACAACTGACCTGAATTTTGT	CAGACGTGTGCTCTTCCGATCTAATTTCCAGAATGAATGAATGGTCA	36293531	36293572	36293475	36293498	36293628	36293652	36293475	36293652	86_40	40
X_110340098_110340139	29249	2	21	AC	X	42	CTACACGACGCTCTTCCGATCTCAGCAGTTCCCTAGAAAAGGGGA	CAGACGTGTGCTCTTCCGATCTCGCCCGTTTAAGAAAATCGTCAC	110340098	110340139	110340023	110340045	110340155	110340177	110340023	110340177	86_40	40
X_110713327_110713368	29250	2	21	AC	X	42	CTACACGACGCTCTTCCGATCTCAGGAACCTGATCACTTATCCCTA	CAGACGTGTGCTCTTCCGATCTAGAGTATGATCCCTGTTTGAGGA	110713327	110713368	110713284	110713307	110713373	110713395	110713284	110713395	86_40	40
X_29467856_29467897	29252	2	21	AC	X	42	CTACACGACGCTCTTCCGATCTCAGTGGAGAAACCAACTGGTGAA	CAGACGTGTGCTCTTCCGATCTTAGATAGAACACTGGAACACAGC	29467856	29467897	29467779	29467801	29467958	29467980	29467779	29467980	86_40	40
X_130958833_130958874	29253	2	21	AC	X	42	CTACACGACGCTCTTCCGATCTCCACATTCCTCAGCACAATGCTA	CAGACGTGTGCTCTTCCGATCTTGTGTAGTGGGACCAATGAGGAT	130958833	130958874	130958794	130958816	130958899	130958921	130958794	130958921	86_40	40
X_120296671_120296712	29254	2	21	AC	X	42	CTACACGACGCTCTTCCGATCTCCATGCTCCAGATGGATTCTTCC	CAGACGTGTGCTCTTCCGATCTTCACCTTGGAAGGTAGAGAGTGG	120296671	120296712	120296640	120296662	120296754	120296776	120296640	120296776	86_40	40
X_10653918_10653959	29255	2	21	AC	X	42	CTACACGACGCTCTTCCGATCTCCCCTACACCCCACATACTCAT	CAGACGTGTGCTCTTCCGATCTTTGGATTTGTGTCTCTGCATCCC	10653918	10653959	10653896	10653917	10654001	10654023	10653896	10654023	86_40	40
X_34601516_34601557	29256	2	21	AC	X	42	CTACACGACGCTCTTCCGATCTCCCTGGAATCTACCCACTTACCA	CAGACGTGTGCTCTTCCGATCTTTGCCTTGTATACGTGTGTGTGT	34601516	34601557	34601489	34601511	34601573	34601595	34601489	34601595	86_40	40
X_125948926_125948967	29257	2	21	AC	X	42	CTACACGACGCTCTTCCGATCTCCTCACTTGGATGACTCAAGCTC	CAGACGTGTGCTCTTCCGATCTGCAATATGAGCCCAGCATTATCA	125948926	125948967	125948889	125948911	125949048	125949070	125948889	125949070	86_40	40
X_10561803_10561844	29258	2	21	AC	X	42	CTACACGACGCTCTTCCGATCTCTACCTCTGTCTCTGTCCCTCTG	CAGACGTGTGCTCTTCCGATCTTTTGCCTAGTATTGCTTTGGGGG	10561803	10561844	10561780	10561802	10561888	10561910	10561780	10561910	86_40	40
X_49956263_49956304	29259	2	21	AC	X	42	CTACACGACGCTCTTCCGATCTCTCAGCTGTCAGATAGGTGTGTG	CAGACGTGTGCTCTTCCGATCTGGAGGCCAGCATTCATACATTCA	49956263	49956304	49956247	49956269	49956362	49956384	49956247	49956384	86_40	40
X_13552916_13552957	29260	2	21	AC	X	42	CTACACGACGCTCTTCCGATCTCTCATGTTTGGGGGAGAATGAGG	CAGACGTGTGCTCTTCCGATCTGTGCTTTTACCTAGTAACTGCTCA	13552916	13552957	13552862	13552884	13552987	13553010	13552862	13553010	86_40	40
X_149316228_149316269	29261	2	21	AC	X	42	CTACACGACGCTCTTCCGATCTCTCCAGGAATGTATCTCCCCTGT	CAGACGTGTGCTCTTCCGATCTCGTTGTATTTGTTACAGCAGCCC	149316228	149316269	149316164	149316186	149316282	149316304	149316164	149316304	86_40	40
X_119134204_119134245	29262	2	21	AC	X	42	CTACACGACGCTCTTCCGATCTCTCTAGCTCCTGGTTCGAGTTCC	CAGACGTGTGCTCTTCCGATCTGACTTTACCGCCACCTTCCTG	119134204	119134245	119134103	119134125	119134280	119134300	119134103	119134300	86_40	40
X_68160892_68160933	29264	2	21	AC	X	42	CTACACGACGCTCTTCCGATCTCTTCTAGGAAATGGCGCCTACC	CAGACGTGTGCTCTTCCGATCTACAGTGACACAACACACACATCA	68160892	68160933	68160753	68160774	68160964	68160986	68160753	68160986	86_40	40
X_102250227_102250268	29265	2	21	AC	X	42	CTACACGACGCTCTTCCGATCTCTTGCAGACTCCAGGGATTTCTC	CAGACGTGTGCTCTTCCGATCTCCAAGCCATGCCAAATTGTTGAT	102250227	102250268	102250167	102250189	102250291	102250313	102250167	102250313	86_40	40
X_116899073_116899114	29266	2	21	AC	X	42	CTACACGACGCTCTTCCGATCTGAGTTTCATTGCCACAAAGGTCC	CAGACGTGTGCTCTTCCGATCTCTGCTGCCACTTTTCTGACTCTT	116899073	116899114	116899045	116899067	116899164	116899186	116899045	116899186	86_40	40
X_139271053_139271094	29267	2	21	AC	X	42	CTACACGACGCTCTTCCGATCTGATACCTCAGCGCCCAAAGTTTA	CAGACGTGTGCTCTTCCGATCTTGTCACGTCTTAAAAGCCCCAAA	139271053	139271094	139270959	139270981	139271095	139271117	139270959	139271117	86_40	40
X_111534596_111534637	29268	2	21	AC	X	42	CTACACGACGCTCTTCCGATCTGATGAGTGTTGGCTGTGTCTCTT	CAGACGTGTGCTCTTCCGATCTTTTCTTCTCTTTTCCACCCCACC	111534596	111534637	111534509	111534531	111534657	111534679	111534509	111534679	86_40	40
X_82779471_82779512	29269	2	21	AC	X	42	CTACACGACGCTCTTCCGATCTGATTCCCTACAGCAAGTGCTACC	CAGACGTGTGCTCTTCCGATCTTCCTCAAAACTTAGGATACCCCAT	82779471	82779512	82779423	82779445	82779521	82779544	82779423	82779544	86_40	40
X_121980079_121980120	29270	2	21	AC	X	42	CTACACGACGCTCTTCCGATCTGCCCAGCCTGTATTGCATTTTTC	CAGACGTGTGCTCTTCCGATCTAAGAAGTTGAGAGACTGCTTGGG	121980079	121980120	121980045	121980067	121980181	121980203	121980045	121980203	86_40	40
X_77855126_77855167	29271	2	21	AC	X	42	CTACACGACGCTCTTCCGATCTGCTCAGAGCCAAATCAAGAAAGAG	CAGACGTGTGCTCTTCCGATCTCTAGGTGTGTTCCTAGGGGAAGG	77855126	77855167	77855083	77855106	77855168	77855190	77855083	77855190	86_40	40
X_21451772_21451813	29272	2	21	AC	X	42	CTACACGACGCTCTTCCGATCTGCTCTTTGTCTTTCATAAGAAACTCTG	CAGACGTGTGCTCTTCCGATCTAGGCCTCATGTTTTTAAAATGCC	21451772	21451813	21451682	21451708	21451830	21451852	21451682	21451852	86_40	40
X_127476657_127476698	29273	2	21	AC	X	42	CTACACGACGCTCTTCCGATCTGCTGAGTATAAAAAGCATGCCCC	CAGACGTGTGCTCTTCCGATCTATGCCTGGTACCAATATGTCTGC	127476657	127476698	127476629	127476651	127476716	127476738	127476629	127476738	86_40	40
X_4657181_4657222	29274	2	21	AC	X	42	CTACACGACGCTCTTCCGATCTGCTGGTCGTGTCATGGATTAAAA	CAGACGTGTGCTCTTCCGATCTTGCTGTAACTACCTGTTGCCTTC	4657181	4657222	4657079	4657101	4657242	4657264	4657079	4657264	86_40	40
X_134096896_134096937	29275	2	21	AC	X	42	CTACACGACGCTCTTCCGATCTGCTTTCCATTGAAGAGGATCCCA	CAGACGTGTGCTCTTCCGATCTGGGATAAGTATGGAGAGGCAGGT	134096896	134096937	134096867	134096889	134097012	134097034	134096867	134097034	86_40	40
X_114849800_114849841	29451	2	21	AG	X	42	CTACACGACGCTCTTCCGATCTAGATGTGAACCTACACGTGTCATC	CAGACGTGTGCTCTTCCGATCTCACCAGACAGGCCCATTTTTCAT	114849800	114849841	114849776	114849799	114849901	114849923	114849776	114849923	97_40	40
X_49772004_49772045	29452	2	21	AG	X	42	CTACACGACGCTCTTCCGATCTAGGAGAGACAGGAGCCTTTTTGA	CAGACGTGTGCTCTTCCGATCTCGCCCCTTCACATAAGGGATATG	49772004	49772045	49771919	49771941	49772112	49772134	49771919	49772134	97_40	40
X_28357307_28357348	29453	2	21	AG	X	42	CTACACGACGCTCTTCCGATCTATGCTGGCAGGGTGGATTTTATT	CAGACGTGTGCTCTTCCGATCTTAATCTGATAGGGACAGGGCTGG	28357307	28357348	28357213	28357235	28357383	28357405	28357213	28357405	97_40	40
X_121974697_121974738	29697	2	21	AG	X	42	CTACACGACGCTCTTCCGATCTGCACCAAAGTCTCTCTCTCCTCT	CAGACGTGTGCTCTTCCGATCTACAACTGACATACCATCTCTGGC	121974697	121974738	121974678	121974700	121974787	121974809	121974678	121974809	100_40	40
X_143846262_143846303	28866	2	21	AT	X	42	CTACACGACGCTCTTCCGATCTCAGAGAGATAAGGGGGTGAGAGG	CAGACGTGTGCTCTTCCGATCTTCAACTCATTCTCGGTAAAGGTCA	143846262	143846303	143846169	143846191	143846320	143846343	143846169	143846343	118_40	40
X_104592237_104592278	28788	3	14	AGT	X	42	CTACACGACGCTCTTCCGATCTGCACAGTGCCTAGTAAACACTCA	CAGACGTGTGCTCTTCCGATCTGCTGCTATTTGAGAAACTGTGGC	104592237	104592278	104592137	104592159	104592348	104592370	104592137	104592370	147_42	42
X_116142453_116142494	28834	3	14	AGT	X	42	CTACACGACGCTCTTCCGATCTCCCAATAATGCTCCAAAGGAAAGTC	CAGACGTGTGCTCTTCCGATCTGCAGACAATGGTTTCTTTTTCTGGA	116142453	116142494	116142375	116142399	116142513	116142537	116142375	116142537	147_42	42
X_139596902_139596943	28789	3	14	AGT	X	42	CTACACGACGCTCTTCCGATCTGTTCAGGAAATGCCTCTTTGGGA	CAGACGTGTGCTCTTCCGATCTTTAGGGCTGGGTTGGAGATTACA	139596902	139596943	139596828	139596850	139596984	139597006	139596828	139597006	154_42	42
X_67860680_67860721	28790	3	14	AGT	X	42	CTACACGACGCTCTTCCGATCTTGAGAGTGCTTAGAATGGAAAGAGG	CAGACGTGTGCTCTTCCGATCTACTGATTACCACTCTGTGCTTGG	67860680	67860721	67860616	67860640	67860737	67860759	67860616	67860759	154_42	42
X_96400282_96400323	28787	3	14	ACT	X	42	CTACACGACGCTCTTCCGATCTCATAGTAAGTATGCGGCTGTTGC	CAGACGTGTGCTCTTCCGATCTTGTTCCCTTCTAATAAGACAAAAGAAA	96400282	96400323	96400247	96400269	96400369	96400395	96400247	96400395	155_42	42
X_110987954_110987995	28804	3	14	ACC	X	42	CTACACGACGCTCTTCCGATCTGCCATTCTGCTATTCCTCATGCT	CAGACGTGTGCTCTTCCGATCTGAAGTCTCTCCCACATCAAGAGC	110987954	110987995	110987920	110987942	110988036	110988058	110987920	110988058	155_42	42
X_9604526_9604567	28736	3	14	AAC	X	42	CTACACGACGCTCTTCCGATCTCTTTTATTCCAACTGAAAACAAAGCAA	CAGACGTGTGCTCTTCCGATCTCCTCAGGCCCAACATAGACATTC	9604526	9604567	9604499	9604525	9604584	9604606	9604499	9604606	113_40	40
X_143372836_143372877	28737	3	14	AAC	X	42	CTACACGACGCTCTTCCGATCTTGGAAAATGTGTAGCCTGACCGA	CAGACGTGTGCTCTTCCGATCTACTTACGTAAATGTACGCAGCCA	143372836	143372877	143372801	143372823	143372907	143372929	143372801	143372929	113_40	40
X_47188936_47188977	28757	3	14	AAT	X	42	CTACACGACGCTCTTCCGATCTAGGTGTAAGGATCCCCTGTTCAA	CAGACGTGTGCTCTTCCGATCTCAGCCTCAAGTAAGTCTCCACAC	47188936	47188977	47188867	47188889	47189010	47189032	47188867	47189032	113_40	40
X_85495441_85495482	28758	3	14	AAT	X	42	CTACACGACGCTCTTCCGATCTAGTTGGCTATCCTCAAACTCAAA	CAGACGTGTGCTCTTCCGATCTGAATCACTAGAGCCCACAAGGTC	85495441	85495482	85495345	85495367	85495557	85495579	85495345	85495579	113_40	40
X_16770488_16770529	28759	3	14	AAT	X	42	CTACACGACGCTCTTCCGATCTATTTCTCTGAAGCGAGCACAGTT	CAGACGTGTGCTCTTCCGATCTTGGGAGTGATGCAACATTAGGTC	16770488	16770529	16770457	16770479	16770595	16770617	16770457	16770617	113_40	40
X_123159979_123160020	28760	3	14	AAT	X	42	CTACACGACGCTCTTCCGATCTGGAGCTGATTGGTATGGTAAGCC	CAGACGTGTGCTCTTCCGATCTAGCCAACAGAACATTGCATTCTG	123159979	123160020	123159880	123159902	123160062	123160084	123159880	123160084	113_40	40
X_49370512_49370553	28761	3	14	AAT	X	42	CTACACGACGCTCTTCCGATCTGTGAACCAGATTGCTCCACTGTA	CAGACGTGTGCTCTTCCGATCTTGATTGCCCTTCACCTGAAACAA	49370512	49370553	49370454	49370476	49370587	49370609	49370454	49370609	113_40	40
X_64871426_64871467	28762	3	14	AAT	X	42	CTACACGACGCTCTTCCGATCTGTGCTCTTTTTGTGGGGGATGTA	CAGACGTGTGCTCTTCCGATCTAGAACAGCGAAAGTCCATAGCAA	64871426	64871467	64871364	64871386	64871470	64871492	64871364	64871492	113_40	40
X_102796319_102796360	28763	3	14	AAT	X	42	CTACACGACGCTCTTCCGATCTGTTTAGCACCTGCGACAGTATCA	CAGACGTGTGCTCTTCCGATCTTGGCCATAGAAACAGTAATGGTC	102796319	102796360	102796266	102796288	102796370	102796392	102796266	102796392	113_40	40
2_60494241_60494282	29857	3	14	AAC	2	42	CTACACGACGCTCTTCCGATCTCTGAGCTGAGAATGAGTGAGAGC	CAGACGTGTGCTCTTCCGATCTTGCAGGAAGAAGGAACAAAGGAC	60494241	60494282	60494164	60494186	60494293	60494315	60494164	60494315	118_40	40
5_61477441_61477482	29891	3	14	AAC	5	42	CTACACGACGCTCTTCCGATCTTCTCACTCTTATTTGCACCAGGC	CAGACGTGTGCTCTTCCGATCTTCCGTCTTGACAACATTTCAACAAT	61477441	61477482	61477403	61477425	61477508	61477532	61477403	61477532	118_40	40
6_25777793_25777834	29897	3	14	AAC	6	42	CTACACGACGCTCTTCCGATCTTCTCATCTGGTGAGGGGTCTTTT	CAGACGTGTGCTCTTCCGATCTATGGTCAGATTGATGGTCTGCAC	25777793	25777834	25777717	25777739	25777853	25777875	25777717	25777875	118_40	40
8_48571107_48571148	29920	3	14	AAC	8	42	CTACACGACGCTCTTCCGATCTACCAGTTGTGTCAGCGGTTTTAT	CAGACGTGTGCTCTTCCGATCTAGGCCTTTTCCATACTCACACAC	48571107	48571148	48571040	48571062	48571187	48571209	48571040	48571209	118_40	40
10_93440828_93440869	29934	3	14	AAC	10	42	CTACACGACGCTCTTCCGATCTCATGGATGTTGGAAATCTGTGGC	CAGACGTGTGCTCTTCCGATCTAGAAGTGGCTTCCAAACTGTGTT	93440828	93440869	93440742	93440764	93440922	93440944	93440742	93440944	118_40	40
14_99498946_99498987	29946	3	14	AAC	14	42	CTACACGACGCTCTTCCGATCTGATAGGAGAGGAAAGCTGGGGAA	CAGACGTGTGCTCTTCCGATCTCAAGTCTTGACCTACAGCTGACC	99498946	99498987	99498906	99498928	99499048	99499070	99498906	99499070	118_40	40
Y_6983590_6983629	48447	2	20	AC	Y	40	CTACACGACGCTCTTCCGATCTGATCTGTCACTTCTGCTGCTCAA	CAGACGTGTGCTCTTCCGATCTTTAGGAGCTCGTTCCCCTGATAC	6983590	6983629	6983551	6983573	6983633	6983655	6983551	6983655	143_43	43
Y_19479689_19479728	64935	2	20	AC	Y	40	CTACACGACGCTCTTCCGATCTACCTCACTGTTATTCATGGAGCA	CAGACGTGTGCTCTTCCGATCTCTGGCCAGAGAAGTTTTTGACCT	19479689	19479728	19479653	19479675	19479744	19479766	19479653	19479766	143_43	43
X_14917688_14917727	29338	2	20	AC	X	40	CTACACGACGCTCTTCCGATCTAAAACTCCATGCACAGTGGCTAT	CAGACGTGTGCTCTTCCGATCTCCCTGGAATGTTAGTTGCAGCAT	14917688	14917727	14917590	14917612	14917808	14917830	14917590	14917830	145_42	42
X_22600411_22600450	29344	2	20	AC	X	40	CTACACGACGCTCTTCCGATCTAAATGTTGGCCCCAAACTCAGAT	CAGACGTGTGCTCTTCCGATCTTCAGCTTAGAGTTTTGAATGATGGT	22600411	22600450	22600315	22600337	22600486	22600510	22600315	22600510	145_42	42
X_151160740_151160779	29364	2	20	AC	X	40	CTACACGACGCTCTTCCGATCTACTTTAAGTGGTGAATGTGTGGT	CAGACGTGTGCTCTTCCGATCTTCTCCAAAATCTCCAAGTGACACA	151160740	151160779	151160687	151160709	151160851	151160874	151160687	151160874	145_42	42
X_39855693_39855732	29355	2	20	AC	X	40	CTACACGACGCTCTTCCGATCTACCTGGGATAGTGGGACTTCTTC	CAGACGTGTGCTCTTCCGATCTGGGGTGAAGAGATGGATATGGGA	39855693	39855732	39855667	39855689	39855743	39855765	39855667	39855765	146_42	42
X_109188503_109188542	29359	2	20	AC	X	40	CTACACGACGCTCTTCCGATCTACTACACATGTGATTCTCCCTCT	CAGACGTGTGCTCTTCCGATCTGGTCAGCCAATTTTAACACCATCC	109188503	109188542	109188478	109188500	109188546	109188569	109188478	109188569	146_42	42
X_147301592_147301631	29366	2	20	AC	X	40	CTACACGACGCTCTTCCGATCTAGAATAATCAGCCTCCCTACCCC	CAGACGTGTGCTCTTCCGATCTGCACTATGCTGAGACACATGGAA	147301592	147301631	147301547	147301569	147301683	147301705	147301547	147301705	146_42	42
X_19736258_19736297	29358	2	20	AC	X	40	CTACACGACGCTCTTCCGATCTACGTGTATCAGTGTGAAAAGGTGT	CAGACGTGTGCTCTTCCGATCTACTCTGTGCTAGGTTCCGAGTTA	19736258	19736297	19736173	19736196	19736339	19736361	19736173	19736361	147_42	42
X_129751038_129751077	29362	2	20	AC	X	40	CTACACGACGCTCTTCCGATCTACTGGTTTTACCAAGTGCTGCAT	CAGACGTGTGCTCTTCCGATCTCCCATTTGAACCAGTTCAGGAGA	129751038	129751077	129751006	129751028	129751184	129751206	129751006	129751206	147_42	42
X_68057975_68058014	29308	2	20	AC	X	40	CTACACGACGCTCTTCCGATCTTGACTAAGACATGTGTGGGCTTG	CAGACGTGTGCTCTTCCGATCTCACCCCCAACAAAGATTCCTTCA	68057975	68058014	68057937	68057959	68058071	68058093	68057937	68058093	148_42	42
X_102732121_102732160	29360	2	20	AC	X	40	CTACACGACGCTCTTCCGATCTACTCCATATGAGAACTCCCTAAACA	CAGACGTGTGCTCTTCCGATCTGAGGAAGGTCTCCCAACAAACTC	102732121	102732160	102732061	102732085	102732195	102732217	102732061	102732217	148_42	42
X_35681762_35681801	29348	2	20	AC	X	40	CTACACGACGCTCTTCCGATCTACAAAGATGCTTAGACACAGCAA	CAGACGTGTGCTCTTCCGATCTTGACAAGGCCATGATACCATCAA	35681762	35681801	35681739	35681761	35681880	35681902	35681739	35681902	150_42	42
X_83849655_83849694	29365	2	20	AC	X	40	CTACACGACGCTCTTCCGATCTAGAAAACCAAGAGCAAAAGACGC	CAGACGTGTGCTCTTCCGATCTTTTCGTTAGTCTAGCTAGTGGTGT	83849655	83849694	83849568	83849590	83849763	83849786	83849568	83849786	150_42	42
X_66943155_66943194	29345	2	20	AC	X	40	CTACACGACGCTCTTCCGATCTAACAGACCTGGATGTTTTTCCCC	CAGACGTGTGCTCTTCCGATCTCTCTGACTCAAGACTTCTCCAGC	66943155	66943194	66943096	66943118	66943252	66943274	66943096	66943274	151_42	42
X_130322865_130322904	29347	2	20	AC	X	40	CTACACGACGCTCTTCCGATCTAATGGGTTGTTTTCTGGGGACAA	CAGACGTGTGCTCTTCCGATCTTGTCCTACCCTGTACTGTCACTG	130322865	130322904	130322787	130322809	130322928	130322950	130322787	130322950	151_42	42
X_76922789_76922828	29351	2	20	AC	X	40	CTACACGACGCTCTTCCGATCTACACTGTCATTTCTCATGGACCAG	CAGACGTGTGCTCTTCCGATCTGGCTGTTTAGTGTTCAACCCAAATG	76922789	76922828	76922715	76922738	76922909	76922933	76922715	76922933	151_42	42
X_121605735_121605774	29352	2	20	AC	X	40	CTACACGACGCTCTTCCGATCTACAGGGCCAGAGAATAGAGCAT	CAGACGTGTGCTCTTCCGATCTACCGAAGGATGAGAATTCAGACT	121605735	121605774	121605670	121605691	121605857	121605879	121605670	121605879	151_42	42
X_149734444_149734483	29343	2	20	AC	X	40	CTACACGACGCTCTTCCGATCTAAATGCAGGGAAGCCTGAAGATT	CAGACGTGTGCTCTTCCGATCTATCGCTGTATTCTTGACTGAGCC	149734444	149734483	149734418	149734440	149734520	149734542	149734418	149734542	152_42	42
X_83743333_83743372	29354	2	20	AC	X	40	CTACACGACGCTCTTCCGATCTACCCTTGCTGAAGAGCAATACTT	CAGACGTGTGCTCTTCCGATCTTCTGAGAAAGACGGAAAACTGGT	83743333	83743372	83743279	83743301	83743374	83743396	83743279	83743396	152_42	42
X_140825502_140825541	29361	2	20	AC	X	40	CTACACGACGCTCTTCCGATCTACTGGGGGAAGAAGGTTGTTTTT	CAGACGTGTGCTCTTCCGATCTGATTGTGTCCAGGTCCTTGTTCA	140825502	140825541	140825478	140825500	140825596	140825618	140825478	140825618	152_42	42
X_31589372_31589411	29367	2	20	AC	X	40	CTACACGACGCTCTTCCGATCTAGAATGTCCCATCAGATTCCAGT	CAGACGTGTGCTCTTCCGATCTTGAGGTGAATTTCCACCCTTAGC	31589372	31589411	31589278	31589300	31589447	31589469	31589278	31589469	152_42	42
X_84322634_84322673	29346	2	20	AC	X	40	CTACACGACGCTCTTCCGATCTAATGCTAGCAGCTGTTTGGTTCA	CAGACGTGTGCTCTTCCGATCTGGTTTCCATATTGAGTTCCTGTGC	84322634	84322673	84322546	84322568	84322674	84322697	84322546	84322697	153_42	42
X_141028532_141028571	29353	2	20	AC	X	40	CTACACGACGCTCTTCCGATCTACCAGAGCTCATCACACATAGGA	CAGACGTGTGCTCTTCCGATCTGTGCACATGGCATAAAATCCGTT	141028532	141028571	141028475	141028497	141028610	141028632	141028475	141028632	153_42	42
X_40984897_40984936	29223	2	20	AC	X	40	CTACACGACGCTCTTCCGATCTACTCTCTTGGCTTTACTCCCTCC	CAGACGTGTGCTCTTCCGATCTACAGCAAACCAAATCCAAAGTAAGC	40984897	40984936	40984855	40984877	40985011	40985035	40984855	40985035	154_42	42
X_119569985_119570024	29309	2	20	AC	X	40	CTACACGACGCTCTTCCGATCTTGACTATGCATCAGGTTCAGCAG	CAGACGTGTGCTCTTCCGATCTAAGATCAACCTGGGAAGCGTTTT	119569985	119570024	119569954	119569976	119570122	119570144	119569954	119570144	154_42	42
X_144594043_144594082	29341	2	20	AC	X	40	CTACACGACGCTCTTCCGATCTAAAGTAAAGGTGGGCAAGAACCC	CAGACGTGTGCTCTTCCGATCTTCCAGGATTTCAACATTCCAGGAT	144594043	144594082	144593956	144593978	144594152	144594175	144593956	144594175	154_42	42
X_17031748_17031787	29368	2	20	AC	X	40	CTACACGACGCTCTTCCGATCTAGCCCAAGGGTAAAGAAAGAAGC	CAGACGTGTGCTCTTCCGATCTGGACGTCAGTCAGAAAGGATGAG	17031748	17031787	17031699	17031721	17031856	17031878	17031699	17031878	154_42	42
X_143401755_143401794	29369	2	20	AC	X	40	CTACACGACGCTCTTCCGATCTAGCCTAGTGACACAATGACCAAAG	CAGACGTGTGCTCTTCCGATCTCTTAGGTCACGAACCCTACAGGA	143401755	143401794	143401697	143401720	143401798	143401820	143401697	143401820	154_42	42
X_117938358_117938397	29339	2	20	AC	X	40	CTACACGACGCTCTTCCGATCTAAACTGAAGTTTGGCCTTGAAGC	CAGACGTGTGCTCTTCCGATCTACTACCATTTGCAAAAACATTCCGT	117938358	117938397	117938270	117938292	117938421	117938445	117938270	117938445	155_42	42
X_45709592_45709631	29349	2	20	AC	X	40	CTACACGACGCTCTTCCGATCTACAACTATCGGCAAATCCAAGCA	CAGACGTGTGCTCTTCCGATCTAAATCTCAGTGTGTGTCTGTCGG	45709592	45709631	45709553	45709575	45709696	45709718	45709553	45709718	155_42	42
X_101083836_101083875	29357	2	20	AC	X	40	CTACACGACGCTCTTCCGATCTACGGACATGCCAGACAATCTCTA	CAGACGTGTGCTCTTCCGATCTGCTCCACATTCATGGCAGCTAAT	101083836	101083875	101083733	101083755	101083888	101083910	101083733	101083910	155_42	42
X_137426375_137426414	29363	2	20	AC	X	40	CTACACGACGCTCTTCCGATCTACTGTGGAACTTGACAGCTGATT	CAGACGTGTGCTCTTCCGATCTGGAACATCTCTCTCTCCAGTCAC	137426375	137426414	137426345	137426367	137426469	137426491	137426345	137426491	155_42	42
X_4668258_4668297	29251	2	20	AC	X	40	CTACACGACGCTCTTCCGATCTCAGGATTTCTGCTCATAGCCCTC	CAGACGTGTGCTCTTCCGATCTTTTTGGGGATGCTGCCAGAAAAT	4668258	4668297	4668188	4668210	4668329	4668351	4668188	4668351	156_42	11
X_150495154_150495193	29340	2	20	AC	X	40	CTACACGACGCTCTTCCGATCTAAAGCACAGCAGCTATCCTCATC	CAGACGTGTGCTCTTCCGATCTCACATCATTGCTGGAGCCTTAGT	150495154	150495193	150495118	150495140	150495242	150495264	150495118	150495264	156_42	11
X_149546086_149546125	29356	2	20	AC	X	40	CTACACGACGCTCTTCCGATCTACCTTTCACTTGATTCCCCAAATG	CAGACGTGTGCTCTTCCGATCTTGCAGGAGAACGTTTTAGGAAATG	149546086	149546125	149546021	149546044	149546206	149546229	149546021	149546229	156_42	11
X_40984897_40984936	29223	2	20	AC	X	40	CTACACGACGCTCTTCCGATCTACTCTCTTGGCTTTACTCCCTCC	CAGACGTGTGCTCTTCCGATCTACAGCAAACCAAATCCAAAGTAAGC	40984897	40984936	40984855	40984877	40985011	40985035	40984855	40985035	85_40	40
X_4668258_4668297	29251	2	20	AC	X	40	CTACACGACGCTCTTCCGATCTCAGGATTTCTGCTCATAGCCCTC	CAGACGTGTGCTCTTCCGATCTTTTTGGGGATGCTGCCAGAAAAT	4668258	4668297	4668188	4668210	4668329	4668351	4668188	4668351	86_40	40
X_78772519_78772558	29454	2	20	AG	X	40	CTACACGACGCTCTTCCGATCTAATTGAGAAGAAGGGAGGGAGGA	CAGACGTGTGCTCTTCCGATCTCCATCTGGTTCCTTCTCATCTGG	78772519	78772558	78772473	78772495	78772609	78772631	78772473	78772631	97_40	40
X_127378941_127378980	29456	2	20	AG	X	40	CTACACGACGCTCTTCCGATCTAGATTACAACGTGAGAGTGGGGA	CAGACGTGTGCTCTTCCGATCTCCAATGACTGCCTTCTTGCTTTG	127378941	127378980	127378876	127378898	127379000	127379022	127378876	127379022	97_40	40
X_107586396_107586435	29487	2	20	AC	X	40	CTACACGACGCTCTTCCGATCTAGGAAAGGAAAAGAGCGCTATGA	CAGACGTGTGCTCTTCCGATCTACTTATGGGCACCATGTCAACTC	107586396	107586435	107586327	107586349	107586451	107586473	107586327	107586473	98_40	40
X_115564768_115564807	29488	2	20	AC	X	40	CTACACGACGCTCTTCCGATCTAGGCAAACCATCTCATTTGCTGA	CAGACGTGTGCTCTTCCGATCTCGTTGTTCAGTGGGGGACTTTTA	115564768	115564807	115564737	115564759	115564871	115564893	115564737	115564893	98_40	40
X_79277527_79277566	29489	2	20	AC	X	40	CTACACGACGCTCTTCCGATCTAGGGAGACTAGACTTTGAAGGACA	CAGACGTGTGCTCTTCCGATCTGGGAAAGCGGGAAAAACAAAACA	79277527	79277566	79277428	79277451	79277642	79277664	79277428	79277664	98_40	40
X_142773289_142773328	29490	2	20	AC	X	40	CTACACGACGCTCTTCCGATCTAGTAAGAATTGCATCCCCACTGT	CAGACGTGTGCTCTTCCGATCTTGGGAGATATTCATAAGATTAAGCAGG	142773289	142773328	142773249	142773271	142773390	142773416	142773249	142773416	98_40	40
X_48726223_48726262	29491	2	20	AC	X	40	CTACACGACGCTCTTCCGATCTAGTCAGCTATGAACACGACACTG	CAGACGTGTGCTCTTCCGATCTAATATCTGGCTTCGTGTGAGCTG	48726223	48726262	48726161	48726183	48726344	48726366	48726161	48726366	98_40	40
X_29235895_29235934	29492	2	20	AC	X	40	CTACACGACGCTCTTCCGATCTAGTGGCACTTTAAGAAACTGCAT	CAGACGTGTGCTCTTCCGATCTTCTGTTTCCTTTGGTCTTTGCCA	29235895	29235934	29235777	29235799	29235994	29236016	29235777	29236016	98_40	40
X_146684355_146684394	29493	2	20	AC	X	40	CTACACGACGCTCTTCCGATCTAGTTGCCATCCCGTAAACCTTTT	CAGACGTGTGCTCTTCCGATCTACACCAACATCTTTAACCACACA	146684355	146684394	146684260	146684282	146684421	146684443	146684260	146684443	98_40	40
X_110058395_110058434	29494	2	20	AC	X	40	CTACACGACGCTCTTCCGATCTATCAGAATGTCTGGTTGAGGACC	CAGACGTGTGCTCTTCCGATCTAAGGTGAGAGAGAAGCCAGATGT	110058395	110058434	110058360	110058382	110058503	110058525	110058360	110058525	98_40	40
X_122073296_122073335	29495	2	20	AC	X	40	CTACACGACGCTCTTCCGATCTATGAACTTGGAACATCACTGCCA	CAGACGTGTGCTCTTCCGATCTTTAGTTGGCTCCCATGTCTCTCT	122073296	122073335	122073245	122073267	122073351	122073373	122073245	122073373	98_40	40
X_21103191_21103230	29496	2	20	AC	X	40	CTACACGACGCTCTTCCGATCTATGACAGTGCTCTGGTTCAGTTG	CAGACGTGTGCTCTTCCGATCTAGCACTCCCTTATCTGCTTTGTG	21103191	21103230	21103150	21103172	21103239	21103261	21103150	21103261	98_40	40
X_11369168_11369207	29497	2	20	AC	X	40	CTACACGACGCTCTTCCGATCTATGTCTTGGGGTAACAAACACCC	CAGACGTGTGCTCTTCCGATCTCCGTTTTGTGGTTACAGGAGGAA	11369168	11369207	11369120	11369142	11369243	11369265	11369120	11369265	98_40	40
X_132674944_132674983	29498	2	20	AC	X	40	CTACACGACGCTCTTCCGATCTATTCAGAAGCAGCAAGTAGCCTC	CAGACGTGTGCTCTTCCGATCTTTACCTTTCATCTCCCACCACCT	132674944	132674983	132674885	132674907	132675003	132675025	132674885	132675025	98_40	40
X_68521546_68521585	29499	2	20	AC	X	40	CTACACGACGCTCTTCCGATCTATTCCTCTCCCTCTGCTTCTCAG	CAGACGTGTGCTCTTCCGATCTTTCAGGATCACACAGCAAGTCAG	68521546	68521585	68521477	68521499	68521667	68521689	68521477	68521689	98_40	40
X_13489131_13489170	29500	2	20	AC	X	40	CTACACGACGCTCTTCCGATCTATTGAGCTGTTCAGTTGGACCTC	CAGACGTGTGCTCTTCCGATCTTGCACCAAACTAATATTTCCACCA	13489131	13489170	13489103	13489125	13489172	13489195	13489103	13489195	98_40	40
X_149506153_149506192	29501	2	20	AC	X	40	CTACACGACGCTCTTCCGATCTATTTATGTGTGAGTGTGCCCCTG	CAGACGTGTGCTCTTCCGATCTCACACATACCAACAGACAGGCAT	149506153	149506192	149506084	149506106	149506194	149506216	149506084	149506216	98_40	40
X_24662567_24662606	29502	2	20	AC	X	40	CTACACGACGCTCTTCCGATCTCAAAGCAGGTGCTTCAACAGTTC	CAGACGTGTGCTCTTCCGATCTTTCCCTTCCCATCTTTTTGGCAG	24662567	24662606	24662503	24662525	24662617	24662639	24662503	24662639	98_40	40
X_40123582_40123621	29503	2	20	AC	X	40	CTACACGACGCTCTTCCGATCTCAATCGTGTGAAGTCTGGCTGTA	CAGACGTGTGCTCTTCCGATCTCCGGTAACTGAGCAAACACTAGA	40123582	40123621	40123549	40123571	40123630	40123652	40123549	40123652	98_40	40
X_126228129_126228168	29504	2	20	AC	X	40	CTACACGACGCTCTTCCGATCTCACAGATCCACACAGAGCATAAC	CAGACGTGTGCTCTTCCGATCTTCTAGCCCCTCCATGATTTATGT	126228129	126228168	126228031	126228053	126228247	126228269	126228031	126228269	98_40	40
X_139436281_139436320	29505	2	20	AC	X	40	CTACACGACGCTCTTCCGATCTCACTCGGCCTTCTGATCATTTCT	CAGACGTGTGCTCTTCCGATCTTGTGGTTAACCGTCAATGTTTCCT	139436281	139436320	139436181	139436203	139436386	139436409	139436181	139436409	98_40	40
X_7156163_7156202	29506	2	20	AC	X	40	CTACACGACGCTCTTCCGATCTCAGCAACATGGATGAAGTGTCCT	CAGACGTGTGCTCTTCCGATCTACGATGACTGGATAAAAACAATGTGC	7156163	7156202	7156072	7156094	7156266	7156291	7156072	7156291	98_40	40
X_6270941_6270980	29507	2	20	AC	X	40	CTACACGACGCTCTTCCGATCTCAGGAGAGTCACTTTCGTAAAGATATG	CAGACGTGTGCTCTTCCGATCTTTTCAGGGAGTGAGGGAGGAAAA	6270941	6270980	6270862	6270888	6271046	6271068	6270862	6271068	98_40	40
X_46571335_46571374	29508	2	20	AC	X	40	CTACACGACGCTCTTCCGATCTCAGGCAAAGGGAAACGAGAAAAC	CAGACGTGTGCTCTTCCGATCTAGAAGGTTCAATGACCTCCCAGA	46571335	46571374	46571270	46571292	46571457	46571479	46571270	46571479	98_40	40
X_138213545_138213584	29509	2	20	AC	X	40	CTACACGACGCTCTTCCGATCTCAGGCAAGCCATTTAACCTTTCTG	CAGACGTGTGCTCTTCCGATCTCACTGCACCTAGCTCTGTTCATC	138213545	138213584	138213443	138213466	138213620	138213642	138213443	138213642	98_40	40
X_34332105_34332144	29510	2	20	AC	X	40	CTACACGACGCTCTTCCGATCTCAGGTCCCTGAAGAAAACACCAA	CAGACGTGTGCTCTTCCGATCTAGTCTCTGTAGGACAGTATTCCAA	34332105	34332144	34332038	34332060	34332189	34332212	34332038	34332212	99_40	40
X_150125757_150125796	29511	2	20	AC	X	40	CTACACGACGCTCTTCCGATCTCAGTGGAAAAGCACCCAGTAAGA	CAGACGTGTGCTCTTCCGATCTGCTCTGTCAAACTGTGTAGAGGG	150125757	150125796	150125689	150125711	150125797	150125819	150125689	150125819	99_40	40
X_152688852_152688891	29512	2	20	AC	X	40	CTACACGACGCTCTTCCGATCTCCAAACATACAGGATTCCCTCGG	CAGACGTGTGCTCTTCCGATCTATGGGGAATAGGGACACACTGAA	152688852	152688891	152688777	152688799	152688955	152688977	152688777	152688977	99_40	40
X_123597687_123597726	29513	2	20	AC	X	40	CTACACGACGCTCTTCCGATCTCCAAGGTGGTGGTAATGTCTCAA	CAGACGTGTGCTCTTCCGATCTGGCATCTTTTGAGTGGGAACTCT	123597687	123597726	123597597	123597619	123597809	123597831	123597597	123597831	99_40	40
X_117319964_117320003	29514	2	20	AC	X	40	CTACACGACGCTCTTCCGATCTCCACGCTAGTAGTATGCCACTTT	CAGACGTGTGCTCTTCCGATCTCCTGTCACCTCCCAGTATGGAT	117319964	117320003	117319910	117319932	117320079	117320100	117319910	117320100	99_40	40
X_124139039_124139078	29515	2	20	AC	X	40	CTACACGACGCTCTTCCGATCTCCAGCATTATCAAAAGTGTGCTCC	CAGACGTGTGCTCTTCCGATCTTCCCAAACTGATTTGGCCATAGA	124139039	124139078	124138974	124138997	124139086	124139108	124138974	124139108	99_40	40
X_67014064_67014103	29516	2	20	AC	X	40	CTACACGACGCTCTTCCGATCTCCCAGTTAGTACCATCAGGAACC	CAGACGTGTGCTCTTCCGATCTTCTGCCAGAGAGAGATTGTGTGT	67014064	67014103	67013942	67013964	67014098	67014120	67013942	67014120	99_40	40
X_113352589_113352628	29517	2	20	AC	X	40	CTACACGACGCTCTTCCGATCTCCCATACACTGCTCTGAACATCC	CAGACGTGTGCTCTTCCGATCTACACACTGGTAGTCTCTGTAGGG	113352589	113352628	113352495	113352517	113352696	113352718	113352495	113352718	99_40	40
X_63455078_63455117	29518	2	20	AC	X	40	CTACACGACGCTCTTCCGATCTCCCCCTCCTTTCAGCATCTTAT	CAGACGTGTGCTCTTCCGATCTGCATGGACGAACCTTGTAAGCAT	63455078	63455117	63454987	63455008	63455139	63455161	63454987	63455161	99_40	40
X_39873639_39873678	29519	2	20	AC	X	40	CTACACGACGCTCTTCCGATCTCCCTCCTTGTCCCGGCTGAG	CAGACGTGTGCTCTTCCGATCTGTTCCAGCCACCTCCATTATGC	39873639	39873678	39873585	39873604	39873745	39873766	39873585	39873766	99_40	40
X_39784244_39784283	29520	2	20	AC	X	40	CTACACGACGCTCTTCCGATCTCCTTACACACAAGCACACCCATA	CAGACGTGTGCTCTTCCGATCTGGAGGACCAACTTTCACATGCTT	39784244	39784283	39784216	39784238	39784341	39784363	39784216	39784363	99_40	40
X_70151043_70151082	29521	2	20	AC	X	40	CTACACGACGCTCTTCCGATCTCCTTATATACACCAGGAGGCGGA	CAGACGTGTGCTCTTCCGATCTTTTGCAAAGCCAAGAAGTGTGTG	70151043	70151082	70150970	70150992	70151087	70151109	70150970	70151109	99_40	40
X_113079540_113079579	29522	2	20	AC	X	40	CTACACGACGCTCTTCCGATCTCCTTCGTATTAGTCAAGGTGCCC	CAGACGTGTGCTCTTCCGATCTGCCAGACCCCACAAATCAAGTAA	113079540	113079579	113079496	113079518	113079608	113079630	113079496	113079630	99_40	40
X_8829414_8829453	29523	2	20	AC	X	40	CTACACGACGCTCTTCCGATCTCGCTGGAGAACCAAGTGTTCATT	CAGACGTGTGCTCTTCCGATCTCATCAGCAAACTGAACAAACCCC	8829414	8829453	8829317	8829339	8829505	8829527	8829317	8829527	99_40	40
X_97327541_97327580	29524	2	20	AC	X	40	CTACACGACGCTCTTCCGATCTCGCTGGTCCTCACTATGAATGTA	CAGACGTGTGCTCTTCCGATCTACATTGACCTGTGCCACATACTC	97327541	97327580	97327450	97327472	97327661	97327683	97327450	97327683	99_40	40
X_55950139_55950178	29525	2	20	AC	X	40	CTACACGACGCTCTTCCGATCTCTCATTCACAGTTACCGAGGGTT	CAGACGTGTGCTCTTCCGATCTTTGCTGAATCCAAACCCATTTGC	55950139	55950178	55950057	55950079	55950258	55950280	55950057	55950280	99_40	40
X_10327528_10327567	29526	2	20	AC	X	40	CTACACGACGCTCTTCCGATCTCTCCAGAGTCGAGTCTTACCTCC	CAGACGTGTGCTCTTCCGATCTTCCTGGTCACGTTGCAATTCTTT	10327528	10327567	10327432	10327454	10327635	10327657	10327432	10327657	99_40	40
X_39596760_39596799	29527	2	20	AC	X	40	CTACACGACGCTCTTCCGATCTCTCTCCTCTGTCTCCCTACAGTG	CAGACGTGTGCTCTTCCGATCTCAGCCACACAGTCCAAAACAAAT	39596760	39596799	39596733	39596755	39596859	39596881	39596733	39596881	99_40	40
X_94422742_94422781	29528	2	20	AC	X	40	CTACACGACGCTCTTCCGATCTCTGCTCCACATTTTAGACCAGGA	CAGACGTGTGCTCTTCCGATCTGAGCTGGGGAGATGGATGATTTG	94422742	94422781	94422648	94422670	94422808	94422830	94422648	94422830	99_40	40
X_33279745_33279784	29529	2	20	AC	X	40	CTACACGACGCTCTTCCGATCTCTGCTGCCTGAGAGCCTATTATG	CAGACGTGTGCTCTTCCGATCTGTGGAGTGCTGTTTGTGGTGATA	33279745	33279784	33279689	33279711	33279853	33279875	33279689	33279875	99_40	40
X_133781441_133781480	29530	2	20	AC	X	40	CTACACGACGCTCTTCCGATCTCTGCTGTGTTGAACTGAGGGAAT	CAGACGTGTGCTCTTCCGATCTTAGCCAAGCAAAGTTCATAGGCA	133781441	133781480	133781384	133781406	133781545	133781567	133781384	133781567	99_40	40
X_92975007_92975046	29531	2	20	AC	X	40	CTACACGACGCTCTTCCGATCTCTGTCATAGCAGCATGCCAAGTA	CAGACGTGTGCTCTTCCGATCTAAGACCTGCCACATTAGGGAAGA	92975007	92975046	92974933	92974955	92975122	92975144	92974933	92975144	99_40	40
X_15416792_15416831	29532	2	20	AC	X	40	CTACACGACGCTCTTCCGATCTCTGTCTTCAGATCAGGGAAAGCC	CAGACGTGTGCTCTTCCGATCTTCCTAACTTCAGTGTTGTCCCCT	15416792	15416831	15416719	15416741	15416893	15416915	15416719	15416915	99_40	40
X_53722571_53722610	29533	2	20	AC	X	40	CTACACGACGCTCTTCCGATCTCTGTGGTAGTGGCTTTCAAAGGT	CAGACGTGTGCTCTTCCGATCTTGTTTTGTGAAACACTGGCTTCAG	53722571	53722610	53722472	53722494	53722613	53722636	53722472	53722636	99_40	40
X_10192334_10192373	29680	2	20	AC	X	40	CTACACGACGCTCTTCCGATCTCCAGGGTGAAGACAAGGAAACAA	CAGACGTGTGCTCTTCCGATCTAGACTTGTTAGTGTTTGCAAAGTGA	10192334	10192373	10192280	10192302	10192403	10192427	10192280	10192427	99_40	40
X_118464031_118464070	29681	2	20	AC	X	40	CTACACGACGCTCTTCCGATCTCTCCTGCCTCAATCTCATCTGTG	CAGACGTGTGCTCTTCCGATCTCAGGAGTTTTTGCTGGGTGGATA	118464031	118464070	118463959	118463981	118464077	118464099	118463959	118464099	99_40	40
X_106647943_106647982	29682	2	20	AC	X	40	CTACACGACGCTCTTCCGATCTGCTCACACAGTAGGAGGAGAGAG	CAGACGTGTGCTCTTCCGATCTTGACATAGGGCCTGTGAGAAAGT	106647943	106647982	106647889	106647911	106648082	106648104	106647889	106648104	99_40	40
X_70151351_70151390	29534	2	20	AC	X	40	CTACACGACGCTCTTCCGATCTCTGTTAGGACCAGTGATTCTGGG	CAGACGTGTGCTCTTCCGATCTAAGACTGAGAGTGAGGTGGAGAC	70151351	70151390	70151281	70151303	70151419	70151441	70151281	70151441	120_40	40
X_116169037_116169076	29535	2	20	AC	X	40	CTACACGACGCTCTTCCGATCTCTGTTGCTTGAAAGCCAATAGCA	CAGACGTGTGCTCTTCCGATCTAGGACAGAACATGGAAAGCCTTG	116169037	116169076	116168961	116168983	116169130	116169152	116168961	116169152	120_40	40
X_118033864_118033903	29536	2	20	AC	X	40	CTACACGACGCTCTTCCGATCTCTTACAGGACAGAAGAAGCCAGC	CAGACGTGTGCTCTTCCGATCTAGAGACATTTGGGGGTACTCAGG	118033864	118033903	118033778	118033800	118033958	118033980	118033778	118033980	120_40	40
X_120513458_120513497	29537	2	20	AC	X	40	CTACACGACGCTCTTCCGATCTCTTCTCCTTGGGCCCATATCCTA	CAGACGTGTGCTCTTCCGATCTACATCAAGATAGCCACAGGAGGA	120513458	120513497	120513380	120513402	120513501	120513523	120513380	120513523	120_40	40
X_46112684_46112723	29538	2	20	AC	X	40	CTACACGACGCTCTTCCGATCTCTTGTCCAATTGGCTGGCAAAAA	CAGACGTGTGCTCTTCCGATCTAGCTTCACCCAGGAGAGCTAAAT	46112684	46112723	46112647	46112669	46112779	46112801	46112647	46112801	120_40	40
X_31368710_31368749	29539	2	20	AC	X	40	CTACACGACGCTCTTCCGATCTCTTTCTGCAGGAGGCACATAGTA	CAGACGTGTGCTCTTCCGATCTGGCATACTTGTTTGTTCCGCATC	31368710	31368749	31368616	31368638	31368791	31368813	31368616	31368813	120_40	40
X_120551635_120551674	29540	2	20	AC	X	40	CTACACGACGCTCTTCCGATCTGAAGCTGTTACTTGGCACCTGTA	CAGACGTGTGCTCTTCCGATCTTCTAATAGGATTTGGAACACACACA	120551635	120551674	120551598	120551620	120551676	120551700	120551598	120551700	120_40	40
X_50568323_50568362	29541	2	20	AC	X	40	CTACACGACGCTCTTCCGATCTGAATCTCAGGATCTTGGCTTCGT	CAGACGTGTGCTCTTCCGATCTAACTCCTGCTTCAACAAGCCTTC	50568323	50568362	50568234	50568256	50568399	50568421	50568234	50568421	120_40	40
X_28606324_28606363	29542	2	20	AC	X	40	CTACACGACGCTCTTCCGATCTGAATGATTGCTGCATCGCATTGA	CAGACGTGTGCTCTTCCGATCTCACTCAGAATACGGGCACACATA	28606324	28606363	28606241	28606263	28606392	28606414	28606241	28606414	120_40	40
X_134823552_134823591	29543	2	20	AC	X	40	CTACACGACGCTCTTCCGATCTGAGGACCACTCCTTGGATGCTAT	CAGACGTGTGCTCTTCCGATCTTGCCACTGTAGGCTTGAGATAGA	134823552	134823591	134823485	134823507	134823668	134823690	134823485	134823690	120_40	40
X_150872385_150872424	29544	2	20	AC	X	40	CTACACGACGCTCTTCCGATCTGAGTACTCCTGGGCATGGTTTTT	CAGACGTGTGCTCTTCCGATCTCCGCGATACCCAAAGTCAATAGT	150872385	150872424	150872312	150872334	150872441	150872463	150872312	150872463	120_40	40
X_22979988_22980027	29545	2	20	AC	X	40	CTACACGACGCTCTTCCGATCTGAGTTTAAGAAGGACAGGCCAGG	CAGACGTGTGCTCTTCCGATCTCATTGAGAATGGCCTCAGGCTT	22979988	22980027	22979910	22979932	22980038	22980059	22979910	22980059	120_40	40
X_55580518_55580557	29546	2	20	AC	X	40	CTACACGACGCTCTTCCGATCTGATGGCACGGTTTTTGTTGTCAT	CAGACGTGTGCTCTTCCGATCTCATCTTGCAAAAGCTGCAGTACA	55580518	55580557	55580425	55580447	55580635	55580657	55580425	55580657	120_40	40
X_109348908_109348947	29547	2	20	AC	X	40	CTACACGACGCTCTTCCGATCTGCAAGAACTTTTTCCTTCCTGGC	CAGACGTGTGCTCTTCCGATCTTCAGATGTCGCCAAGTTTCAAGA	109348908	109348947	109348851	109348873	109349079	109349101	109348851	109349101	120_40	40
X_56626321_56626360	29548	2	20	AC	X	40	CTACACGACGCTCTTCCGATCTGCACAAAGAGATTAGTCAACCTGC	CAGACGTGTGCTCTTCCGATCTTGGTATCTGATCCAAGTACCACAA	56626321	56626360	56626219	56626242	56626401	56626424	56626219	56626424	120_40	40
X_83393810_83393849	29549	2	20	AC	X	40	CTACACGACGCTCTTCCGATCTGCACAGCTTAAGAGTTCTGTTTGT	CAGACGTGTGCTCTTCCGATCTCCTACCCAAATTTCCCTTCCTCA	83393810	83393849	83393773	83393796	83393857	83393879	83393773	83393879	120_40	40
X_153828949_153828988	29550	2	20	AC	X	40	CTACACGACGCTCTTCCGATCTGCAGATTAAATGTGGAGGCCTGA	CAGACGTGTGCTCTTCCGATCTGATTGGTGGCCTTTGAAACACTG	153828949	153828988	153828864	153828886	153829007	153829029	153828864	153829029	120_40	40
X_83549397_83549436	29551	2	20	AC	X	40	CTACACGACGCTCTTCCGATCTGCAGCAAGTAACCCAATTATTGTCC	CAGACGTGTGCTCTTCCGATCTCTAGCACAGAGCTTAGAACCAGG	83549397	83549436	83549293	83549317	83549500	83549522	83549293	83549522	120_40	40
X_119572548_119572587	29552	2	20	AC	X	40	CTACACGACGCTCTTCCGATCTGCAGCAATGCCAAAGTAGCTAAG	CAGACGTGTGCTCTTCCGATCTCTGCAGGTAGTTGAGTTGGAACA	119572548	119572587	119572506	119572528	119572631	119572653	119572506	119572653	120_40	40
X_13934783_13934822	29553	2	20	AC	X	40	CTACACGACGCTCTTCCGATCTGCAGCATGTCTGCACTGTTTAAG	CAGACGTGTGCTCTTCCGATCTTAGCCAACCTGCTGCCTTATTTT	13934783	13934822	13934727	13934749	13934842	13934864	13934727	13934864	120_40	40
X_94603411_94603450	29554	2	20	AC	X	40	CTACACGACGCTCTTCCGATCTGCATGCTCCTAGAATGACACACA	CAGACGTGTGCTCTTCCGATCTACCCATGATATACAATACACATAACCC	94603411	94603450	94603395	94603417	94603526	94603552	94603395	94603552	120_40	40
X_11468324_11468363	29555	2	20	AC	X	40	CTACACGACGCTCTTCCGATCTGCTGACAGGTCGTTGATATTTGC	CAGACGTGTGCTCTTCCGATCTCCCTTTCATCAACCTGGGATCAA	11468324	11468363	11468246	11468268	11468386	11468408	11468246	11468408	120_40	40
X_119850942_119850981	29556	2	20	AC	X	40	CTACACGACGCTCTTCCGATCTGGAAATCAAGAGGCATGAGGGAG	CAGACGTGTGCTCTTCCGATCTCAGCACATGGGACTTTTTCCAGA	119850942	119850981	119850854	119850876	119851007	119851029	119850854	119851029	120_40	40
X_14599889_14599928	29557	2	20	AC	X	40	CTACACGACGCTCTTCCGATCTGGAAGTACAGGCTATTCCGTTCA	CAGACGTGTGCTCTTCCGATCTGAAGCAAAGCTGACATTGGAACC	14599889	14599928	14599798	14599820	14599988	14600010	14599798	14600010	120_40	40
X_57614442_57614481	29558	2	20	AC	X	40	CTACACGACGCTCTTCCGATCTGGACATGCTGTTCTCCAAGTCAT	CAGACGTGTGCTCTTCCGATCTAATGCTCCATGCACAGGATTAGG	57614442	57614481	57614382	57614404	57614539	57614561	57614382	57614561	120_40	40
X_28456289_28456328	29559	2	20	AC	X	40	CTACACGACGCTCTTCCGATCTGGCAAGAAATTGTGCTTACCACG	CAGACGTGTGCTCTTCCGATCTCCATGAGGACAGTAGCAATCCCT	28456289	28456328	28456194	28456216	28456408	28456430	28456194	28456430	120_40	40
X_51869087_51869126	29560	2	20	AC	X	40	CTACACGACGCTCTTCCGATCTGGCAGAGAGCATCAAGCAGTAT	CAGACGTGTGCTCTTCCGATCTACTATATGCCTAGTTGTGTGCAT	51869087	51869126	51869051	51869072	51869131	51869153	51869051	51869153	120_40	40
X_137394650_137394689	29561	2	20	AC	X	40	CTACACGACGCTCTTCCGATCTGGCCTAGCAACAAAGTGTGCTTA	CAGACGTGTGCTCTTCCGATCTTCCACAATTGCATGTCAGTTCCT	137394650	137394689	137394549	137394571	137394754	137394776	137394549	137394776	120_40	40
X_80855025_80855064	29562	2	20	AC	X	40	CTACACGACGCTCTTCCGATCTGGCTGTACACTGCAGGAAAAGTA	CAGACGTGTGCTCTTCCGATCTGGATTCTGATTCCCACTCCAAGG	80855025	80855064	80854984	80855006	80855092	80855114	80854984	80855114	120_40	40
X_70613075_70613114	29563	2	20	AC	X	40	CTACACGACGCTCTTCCGATCTGGCTTGTCCTTTGAAATCCCTGA	CAGACGTGTGCTCTTCCGATCTACGAGACAAATAGCCACACACAA	70613075	70613114	70613046	70613068	70613126	70613148	70613046	70613148	120_40	40
X_106559930_106559969	29564	2	20	AC	X	40	CTACACGACGCTCTTCCGATCTGGGAAAGAATGCACTGATCTGCT	CAGACGTGTGCTCTTCCGATCTGCAGGCTTACATGCCTGTTTGAT	106559930	106559969	106559829	106559851	106560041	106560063	106559829	106560063	120_40	40
X_57940818_57940857	29565	2	20	AC	X	40	CTACACGACGCTCTTCCGATCTGGGCTGCAGTATTGAAAGGACTA	CAGACGTGTGCTCTTCCGATCTCCCTCTTGATAGGGACATCCTGT	57940818	57940857	57940782	57940804	57940908	57940930	57940782	57940930	120_40	40
X_138014866_138014905	29566	2	20	AC	X	40	CTACACGACGCTCTTCCGATCTGGGGAAAAACATGTCAGGAGTGT	CAGACGTGTGCTCTTCCGATCTAGGATGGCTACTGATCCTAGCAG	138014866	138014905	138014842	138014864	138014962	138014984	138014842	138014984	120_40	40
X_47348825_47348864	29567	2	20	AC	X	40	CTACACGACGCTCTTCCGATCTGTAGATTAAGCACACACATGGGC	CAGACGTGTGCTCTTCCGATCTAACAGAAATTTTGGGTGAGGGCA	47348825	47348864	47348801	47348823	47348937	47348959	47348801	47348959	120_40	40
X_74123716_74123755	29568	2	20	AC	X	40	CTACACGACGCTCTTCCGATCTGTCACTTTCCTTTCTCCCAGCAA	CAGACGTGTGCTCTTCCGATCTAGACATCCATTCCCAACAAAGCC	74123716	74123755	74123617	74123639	74123766	74123788	74123617	74123788	120_40	40
X_69812907_69812946	29569	2	20	AC	X	40	CTACACGACGCTCTTCCGATCTGTGGGGCAATTTATGCACAAGAG	CAGACGTGTGCTCTTCCGATCTGCACATCCAGCTGTTAGTCTTGA	69812907	69812946	69812877	69812899	69812983	69813005	69812877	69813005	120_40	40
X_147782537_147782576	29570	2	20	AC	X	40	CTACACGACGCTCTTCCGATCTGTTCATAATTTGGGGCCTTTGCC	CAGACGTGTGCTCTTCCGATCTGAATCCACCAAGGCAATTTACCA	147782537	147782576	147782449	147782471	147782612	147782634	147782449	147782634	120_40	40
X_147532879_147532918	29571	2	20	AC	X	40	CTACACGACGCTCTTCCGATCTTACCAAAATCAGAGTTGCTGCCA	CAGACGTGTGCTCTTCCGATCTTTCCAACAGTGAACCCCTGTTTC	147532879	147532918	147532792	147532814	147532986	147533008	147532792	147533008	120_40	40
X_9732545_9732584	29572	2	20	AC	X	40	CTACACGACGCTCTTCCGATCTTACCCAAAAAGCCTGGATAGGGA	CAGACGTGTGCTCTTCCGATCTTTTCCTCATTTTTGCCCAACTGC	9732545	9732584	9732454	9732476	9732626	9732648	9732454	9732648	120_40	40
X_25864389_25864428	29573	2	20	AC	X	40	CTACACGACGCTCTTCCGATCTTAGGTAGGCCATGTTCTGGGAAA	CAGACGTGTGCTCTTCCGATCTACCCTTTAGTACGGAATTGGGGT	25864389	25864428	25864320	25864342	25864446	25864468	25864320	25864468	121_40	40
X_94905117_94905156	29574	2	20	AC	X	40	CTACACGACGCTCTTCCGATCTTAGTCTTTGTTTTCCCCTTCCCA	CAGACGTGTGCTCTTCCGATCTTTAGACTTCTGGGCAGCTATGGA	94905117	94905156	94905094	94905116	94905205	94905227	94905094	94905227	121_40	40
X_46353797_46353836	29575	2	20	AC	X	40	CTACACGACGCTCTTCCGATCTTAGTGGCATGATCACTGTAGCCT	CAGACGTGTGCTCTTCCGATCTACACACACACATTCCCAGCTTAG	46353797	46353836	46353710	46353732	46353866	46353888	46353710	46353888	121_40	40
X_10882999_10883038	29576	2	20	AC	X	40	CTACACGACGCTCTTCCGATCTTATCTGTAGTGGTGTTGGCGTTG	CAGACGTGTGCTCTTCCGATCTAAGCCTATTCCTTCAACCTCTGC	10882999	10883038	10882960	10882982	10883053	10883075	10882960	10883075	121_40	40
X_141252335_141252374	29577	2	20	AC	X	40	CTACACGACGCTCTTCCGATCTTATGTACACCACTCTTCCTGCCC	CAGACGTGTGCTCTTCCGATCTCCATCTGTTGTAGCAAACATGCC	141252335	141252374	141252303	141252325	141252414	141252436	141252303	141252436	121_40	40
X_47097186_47097225	29578	2	20	AC	X	40	CTACACGACGCTCTTCCGATCTTATGTGTCAGAAATGCCACAGCA	CAGACGTGTGCTCTTCCGATCTCACAGACATAAACCTCCTCCTGC	47097186	47097225	47097146	47097168	47097231	47097253	47097146	47097253	121_40	40
X_95804489_95804528	29579	2	20	AC	X	40	CTACACGACGCTCTTCCGATCTTCAGTCCTCATGTCTTTGGAGGA	CAGACGTGTGCTCTTCCGATCTATCCCTCACTTCTGCTTCCACTT	95804489	95804528	95804453	95804475	95804599	95804621	95804453	95804621	121_40	40
X_34129764_34129803	29580	2	20	AC	X	40	CTACACGACGCTCTTCCGATCTTCTCCTTCCTCTTAACCTCCACT	CAGACGTGTGCTCTTCCGATCTGGAAGCAGGAAGAAAATTTGCCA	34129764	34129803	34129691	34129713	34129870	34129892	34129691	34129892	121_40	40
X_8063678_8063717	29581	2	20	AC	X	40	CTACACGACGCTCTTCCGATCTTCTGTGTGCTTTCTCAGCATCTC	CAGACGTGTGCTCTTCCGATCTTACACTCTCACACTGTCCTGGTT	8063678	8063717	8063628	8063650	8063780	8063802	8063628	8063802	121_40	40
X_29954636_29954675	29582	2	20	AC	X	40	CTACACGACGCTCTTCCGATCTTCTTCAGTTATACCTTCTGGCAA	CAGACGTGTGCTCTTCCGATCTTGAACTCTTGACTTGCAGTTTTT	29954636	29954675	29954595	29954617	29954698	29954720	29954595	29954720	121_40	40
X_3918793_3918832	29583	2	20	AC	X	40	CTACACGACGCTCTTCCGATCTTCTTGCTTCTTCACCCATCTTCG	CAGACGTGTGCTCTTCCGATCTGGGGTAGAGAGTTGGGGCATTTA	3918793	3918832	3918762	3918784	3918859	3918881	3918762	3918881	121_40	40
X_10350722_10350761	29584	2	20	AC	X	40	CTACACGACGCTCTTCCGATCTTGAAGGTGTGTGTGTATGTGGTG	CAGACGTGTGCTCTTCCGATCTTTATGTTGAGGGACACATGGCTG	10350722	10350761	10350687	10350709	10350773	10350795	10350687	10350795	121_40	40
X_2917010_2917049	29585	2	20	AC	X	40	CTACACGACGCTCTTCCGATCTTGAGAGCCATATTGGAGGGTTGA	CAGACGTGTGCTCTTCCGATCTGCTGGTAAATTGAAGAGCTGGGA	2917010	2917049	2916953	2916975	2917080	2917102	2916953	2917102	121_40	40
X_35414690_35414729	29586	2	20	AC	X	40	CTACACGACGCTCTTCCGATCTTGAGGAGAAATAATACCTTACCCCT	CAGACGTGTGCTCTTCCGATCTTGACACACAGTAATTGTAGGTCTCC	35414690	35414729	35414614	35414638	35414730	35414754	35414614	35414754	121_40	40
X_47839266_47839305	29587	2	20	AC	X	40	CTACACGACGCTCTTCCGATCTTGAGGCAGGAAACAAAGGGAAAA	CAGACGTGTGCTCTTCCGATCTCCTTCAAACCTCCACTCCAAGTT	47839266	47839305	47839172	47839194	47839385	47839407	47839172	47839407	121_40	40
X_16794558_16794597	29588	2	20	AC	X	40	CTACACGACGCTCTTCCGATCTTGATGATGGGAGGAAGTGAGCAT	CAGACGTGTGCTCTTCCGATCTTCACTTGCCATCAAGCTGATTCT	16794558	16794597	16794534	16794556	16794665	16794687	16794534	16794687	121_40	40
X_15689968_15690007	29589	2	20	AC	X	40	CTACACGACGCTCTTCCGATCTTGATGTTACAATCTTTTGGTATGCT	CAGACGTGTGCTCTTCCGATCTAGGGGATATATGTGATGGAGACA	15689968	15690007	15689929	15689953	15690057	15690079	15689929	15690079	121_40	40
X_68246362_68246401	29590	2	20	AC	X	40	CTACACGACGCTCTTCCGATCTTGCAGAGGAAGGAGAATACGAGT	CAGACGTGTGCTCTTCCGATCTCTGAACCCGACTGGCTATCATTT	68246362	68246401	68246334	68246356	68246454	68246476	68246334	68246476	121_40	40
X_102494795_102494834	29591	2	20	AC	X	40	CTACACGACGCTCTTCCGATCTTGCCTACCAATTACCAGGCACTA	CAGACGTGTGCTCTTCCGATCTCTGCCACTCTGACATACATAGCC	102494795	102494834	102494740	102494762	102494885	102494907	102494740	102494907	121_40	40
X_149591623_149591662	29592	2	20	AC	X	40	CTACACGACGCTCTTCCGATCTTGCCTAGTGCAACATTTCCAGTT	CAGACGTGTGCTCTTCCGATCTCTGGTCTTTTCCTTTTCTGCCCT	149591623	149591662	149591530	149591552	149591694	149591716	149591530	149591716	121_40	40
X_119721855_119721894	29593	2	20	AC	X	40	CTACACGACGCTCTTCCGATCTTGCCTTCAATAAATGGTGCTGGT	CAGACGTGTGCTCTTCCGATCTGGGGTCGGATTTCATTCTTCTGA	119721855	119721894	119721805	119721827	119721934	119721956	119721805	119721956	121_40	40
X_78354605_78354644	29594	2	20	AC	X	40	CTACACGACGCTCTTCCGATCTTGCTAAAATGACGTCTGCACTCA	CAGACGTGTGCTCTTCCGATCTAAGGTGATGGCCTCCATTTTCAT	78354605	78354644	78354515	78354537	78354702	78354724	78354515	78354724	121_40	40
X_5629240_5629279	29595	2	20	AC	X	40	CTACACGACGCTCTTCCGATCTTGCTATTGTCAACCAACACAGACA	CAGACGTGTGCTCTTCCGATCTCCACGGAATTGCCTTTGAAACAT	5629240	5629279	5629178	5629201	5629310	5629332	5629178	5629332	121_40	40
X_104492287_104492326	29596	2	20	AC	X	40	CTACACGACGCTCTTCCGATCTTGCTTAAGTCTAATGAAACCCATGT	CAGACGTGTGCTCTTCCGATCTGGTGGCTGAAATGGAATGGAAGA	104492287	104492326	104492184	104492208	104492403	104492425	104492184	104492425	121_40	40
X_28989994_28990033	29597	2	20	AC	X	40	CTACACGACGCTCTTCCGATCTTGGACCCATCTGTATTTGGGGAT	CAGACGTGTGCTCTTCCGATCTCCATGACAGGATGTAGTGACCAA	28989994	28990033	28989906	28989928	28990114	28990136	28989906	28990136	121_40	40
X_31474954_31474993	29598	2	20	AC	X	40	CTACACGACGCTCTTCCGATCTTGGCATTTTCTCGGCAACTCTTA	CAGACGTGTGCTCTTCCGATCTTTGTGAGTGTGTTGAGACTTCCA	31474954	31474993	31474867	31474889	31475035	31475057	31474867	31475057	121_40	40
X_135491208_135491247	29599	2	20	AC	X	40	CTACACGACGCTCTTCCGATCTTGTAGCAAGGGAGTTTTCAGAGC	CAGACGTGTGCTCTTCCGATCTTGTTCCACTGTTTGTTTTGGAGG	135491208	135491247	135491166	135491188	135491259	135491281	135491166	135491281	121_40	40
X_17622349_17622388	29600	2	20	AC	X	40	CTACACGACGCTCTTCCGATCTTGTCTCCCAAACTACATGGTTTCC	CAGACGTGTGCTCTTCCGATCTAAAGGCTTTGATAGGTTCTGCAA	17622349	17622388	17622308	17622331	17622450	17622472	17622308	17622472	121_40	40
X_103766192_103766231	29601	2	20	AC	X	40	CTACACGACGCTCTTCCGATCTTGTGTTATTTCTTTCTGGCTGCCT	CAGACGTGTGCTCTTCCGATCTAGCCAATCTTCATTCTGCTTGGA	103766192	103766231	103766162	103766185	103766255	103766277	103766162	103766277	121_40	40
X_32191184_32191223	29602	2	20	AC	X	40	CTACACGACGCTCTTCCGATCTTTCAGCTTGTGATACCTGATTTTG	CAGACGTGTGCTCTTCCGATCTGCCACATGCTGCTGAAAATGTAA	32191184	32191223	32191160	32191183	32191236	32191258	32191160	32191258	121_40	40
X_17833444_17833483	29603	2	20	AC	X	40	CTACACGACGCTCTTCCGATCTTTCCAGAATGCATGTGTTTGCAC	CAGACGTGTGCTCTTCCGATCTAATACCTGAGGTGGAACAGGTGA	17833444	17833483	17833402	17833424	17833562	17833584	17833402	17833584	121_40	40
X_23111586_23111625	29604	2	20	AC	X	40	CTACACGACGCTCTTCCGATCTTTCCAGTTCAGGCTTATGGGTTG	CAGACGTGTGCTCTTCCGATCTCGCATCGCATGTTAGGTTTATCG	23111586	23111625	23111483	23111505	23111663	23111685	23111483	23111685	121_40	40
X_81283324_81283363	29605	2	20	AC	X	40	CTACACGACGCTCTTCCGATCTTTCTACAAGGCCAGCAATAACCA	CAGACGTGTGCTCTTCCGATCTCAGAGACATTGACACGTAAGGGG	81283324	81283363	81283289	81283311	81283364	81283386	81283289	81283386	121_40	40
X_4210466_4210505	29606	2	20	AC	X	40	CTACACGACGCTCTTCCGATCTTTGGCCAACTGTCTTTTATTTACA	CAGACGTGTGCTCTTCCGATCTGTGGAGAATCAACACCCTCTGAA	4210466	4210505	4210374	4210397	4210559	4210581	4210374	4210581	121_40	40
X_34227791_34227830	29607	2	20	AC	X	40	CTACACGACGCTCTTCCGATCTTTGTCAATTTACTGCTGCTGGGA	CAGACGTGTGCTCTTCCGATCTTGGTGCTTTATTGCAATTGTAAGAGTC	34227791	34227830	34227726	34227748	34227903	34227929	34227726	34227929	121_40	40
X_130427697_130427736	29608	2	20	AC	X	40	CTACACGACGCTCTTCCGATCTTTTTCTCCCTCCCGTTTATCCCT	CAGACGTGTGCTCTTCCGATCTTTAATTGCGTTTTTGCCAGGGTG	130427697	130427736	130427615	130427637	130427808	130427830	130427615	130427830	121_40	40
X_129772406_129772445	52509	2	20	AC	X	40	CTACACGACGCTCTTCCGATCTCGCCTGGCCCAAGATTTCTTAAT	CAGACGTGTGCTCTTCCGATCTTGGCAGCTTCTAAAGGTCCTTAC	129772406	129772445	129772331	129772353	129772527	129772549	129772331	129772549	124_40	40
X_22515661_22515700	29444	4	10	AGAT	X	40	CTACACGACGCTCTTCCGATCTCAGCTGGAGTCAGTAGAACTGC	CAGACGTGTGCTCTTCCGATCTACATAAGAATCACAAAATCTCAGGGG	22515661	22515700	22515614	22515635	22515753	22515778	22515614	22515778	97_40	40
X_77341017_77341055	28769	3	13	AAT	X	39	CTACACGACGCTCTTCCGATCTTGTCAAACCCACAGAACATACAACA	CAGACGTGTGCTCTTCCGATCTTTTGCCCACACCCTCACATATAC	77341017	77341055	77340955	77340979	77341133	77341155	77340955	77341155	148_42	42
X_56583997_56584035	28791	3	13	AGT	X	39	CTACACGACGCTCTTCCGATCTTGGTGGTAAGAGTCATGGAAAGA	CAGACGTGTGCTCTTCCGATCTATTCACCCCAGGGGGCTATAAAT	56583997	56584035	56583947	56583969	56584073	56584095	56583947	56584095	148_42	42
X_52019087_52019125	28792	3	13	ACT	X	39	CTACACGACGCTCTTCCGATCTTTAGGTGCTGTATGAGTTGGCAC	CAGACGTGTGCTCTTCCGATCTAGCAAACATAAGATTGATGCAAATAGC	52019087	52019125	52018997	52019019	52019165	52019191	52018997	52019191	150_42	42
X_48317042_48317080	28803	3	13	AGG	X	39	CTACACGACGCTCTTCCGATCTCCGAGGGTAATCCTGACAAACAG	CAGACGTGTGCTCTTCCGATCTGATCATGGCCCTAATCCCAACC	48317042	48317080	48316961	48316983	48317115	48317136	48316961	48317136	150_42	42
X_19201080_19201118	28835	3	13	AGT	X	39	CTACACGACGCTCTTCCGATCTAGGCCTCAGTTTCTTGTCTTGTG	CAGACGTGTGCTCTTCCGATCTCGAGTGATGGCATGTGACTTGAA	19201080	19201118	19201007	19201029	19201183	19201205	19201007	19201205	150_42	42
X_48789438_48789476	28768	3	13	AAT	X	39	CTACACGACGCTCTTCCGATCTTGGGTGATGAGAGAGAAACTTCG	CAGACGTGTGCTCTTCCGATCTTCTCTTCCCAAACACAGTTCTGC	48789438	48789476	48789399	48789421	48789477	48789499	48789399	48789499	152_42	42
X_22332295_22332333	28802	3	13	AGG	X	39	CTACACGACGCTCTTCCGATCTAAAGCTCAGTGATGCTCTTGACC	CAGACGTGTGCTCTTCCGATCTAGCTGGCTACAGAATCCTGAAAA	22332295	22332333	22332238	22332260	22332415	22332437	22332238	22332437	155_42	42
X_110987997_110988035	28804	3	13	AGG	X	39	CTACACGACGCTCTTCCGATCTGCCATTCTGCTATTCCTCATGCT	CAGACGTGTGCTCTTCCGATCTGAAGTCTCTCCCACATCAAGAGC	110987997	110988035	110987920	110987942	110988036	110988058	110987920	110988058	155_42	42
X_94710414_94710452	28738	3	13	AAC	X	39	CTACACGACGCTCTTCCGATCTTAGTCACTGTACTCTCAGCCTGG	CAGACGTGTGCTCTTCCGATCTTGTAGACAGTCATGTACCCACCT	94710414	94710452	94710369	94710391	94710533	94710555	94710369	94710555	113_40	40
X_129197948_129197986	28764	3	13	AAT	X	39	CTACACGACGCTCTTCCGATCTGACGGCCTTTTTGTTTGCTTGAT	CAGACGTGTGCTCTTCCGATCTCCTTTCCAAGATGACGGGTTGAT	129197948	129197986	129197923	129197945	129198069	129198091	129197923	129198091	113_40	40
X_114257385_114257423	28765	3	13	AAT	X	39	CTACACGACGCTCTTCCGATCTTAGGAGATTTGGGCTCTCTCACC	CAGACGTGTGCTCTTCCGATCTCGGAGCTTGACACCTAGTAAAGG	114257385	114257423	114257332	114257354	114257443	114257465	114257332	114257465	113_40	40
X_143139497_143139535	28766	3	13	AAT	X	39	CTACACGACGCTCTTCCGATCTTCATACTTCTCTACTCGGGAGGC	CAGACGTGTGCTCTTCCGATCTAGTGATAAAAATCAGGCCCAGCA	143139497	143139535	143139392	143139414	143139563	143139585	143139392	143139585	113_40	40
X_107626193_107626231	28767	3	13	AAT	X	39	CTACACGACGCTCTTCCGATCTTGAGACCCTGTCTCCATTCCC	CAGACGTGTGCTCTTCCGATCTTCTTATCGTTTAAGTGTACTAACTTGC	107626193	107626231	107626164	107626184	107626303	107626329	107626164	107626329	113_40	40
1_102290200_102290238	29793	3	13	AAC	1	39	CTACACGACGCTCTTCCGATCTGGTCCCAGGGTAACTTTCCTTTC	CAGACGTGTGCTCTTCCGATCTATCAGTCATTGCTTGGCTAGTGG	102290200	102290238	102290149	102290171	102290257	102290279	102290149	102290279	118_40	40
14_89576201_89576239	29826	3	13	AAC	14	39	CTACACGACGCTCTTCCGATCTAAGAGCATGGAAGAACCACACTC	CAGACGTGTGCTCTTCCGATCTTCAATCACTGAAACGAGTTACTGC	89576201	89576239	89576172	89576194	89576295	89576318	89576172	89576318	118_40	40
18_60402798_60402836	29840	3	13	AAC	18	39	CTACACGACGCTCTTCCGATCTTGGAAGGTGTCATTGCTTCCTAC	CAGACGTGTGCTCTTCCGATCTAGGTTGATGCTACCTGGGGTAAT	60402798	60402836	60402733	60402755	60402878	60402900	60402733	60402900	118_40	40
10_18722803_18722841	29930	3	13	AAC	10	39	CTACACGACGCTCTTCCGATCTGGGAACAGTAAACGTGTTATGGC	CAGACGTGTGCTCTTCCGATCTAGCTCTTGCTGGAATGGATAGGA	18722803	18722841	18722714	18722736	18722902	18722924	18722714	18722924	118_40	40
11_120347791_120347829	29936	3	13	AAC	11	39	CTACACGACGCTCTTCCGATCTTCTCGCCTTAATAGTGTGTTGCC	CAGACGTGTGCTCTTCCGATCTGCCAGCTTCAGAAAGTTGGAAAG	120347791	120347829	120347737	120347759	120347910	120347932	120347737	120347932	118_40	40
3_85414018_85414056	29965	3	13	AAC	3	39	CTACACGACGCTCTTCCGATCTCCTGGCAGACAGATGCAATAACT	CAGACGTGTGCTCTTCCGATCTAACATCGTGCCATTTTCCAATGC	85414018	85414056	85413922	85413944	85414101	85414123	85413922	85414123	118_40	40
7_70080552_70080590	29976	3	13	AAC	7	39	CTACACGACGCTCTTCCGATCTCTCACAAGGTGCAGGAAAAGTCT	CAGACGTGTGCTCTTCCGATCTGTATACCTGGTGAAAGCAGCACA	70080552	70080590	70080470	70080492	70080669	70080691	70080470	70080691	118_40	40
8_49751782_49751820	29980	3	13	AAC	8	39	CTACACGACGCTCTTCCGATCTAACTGAGCTAGAGGCATAGGAGG	CAGACGTGTGCTCTTCCGATCTTGAGGGACCACAGGGGAATTTTA	49751782	49751820	49751680	49751702	49751860	49751882	49751680	49751882	118_40	40
7_36924925_36924963	29907	3	13	AAC	7	39	CTACACGACGCTCTTCCGATCTTGTTCAGGGGTAGTTCATTTTTAGA	CAGACGTGTGCTCTTCCGATCTCCCTGACTAGGTTGAAGTGGGTA	36924925	36924963	36924860	36924884	36925012	36925034	36924860	36925034	119_40	40
Y_20804005_20804042	36853	2	19	AC	Y	38	CTACACGACGCTCTTCCGATCTTGACTTGTGGTTTACTTCCCAGAA	CAGACGTGTGCTCTTCCGATCTTCAATGACAAATTTGATCTGGCG	20804005	20804042	20803976	20803999	20804043	20804065	20803976	20804065	140_43	43
X_146311521_146311558	71179	2	19	AT	X	38	CTACACGACGCTCTTCCGATCTAGGACTACAAAACACTGGGAACA	CAGACGTGTGCTCTTCCGATCTACATGTGTGTACATATACTTCTGGA	146311521	146311558	146311406	146311428	146311594	146311618	146311406	146311618	144_43	40
X_104413098_104413135	29663	2	19	AC	X	38	CTACACGACGCTCTTCCGATCTCCTCTAAATGCGGGGCTATTCAT	CAGACGTGTGCTCTTCCGATCTTCCCCCTCTCTCTCTTTACATGC	104413098	104413135	104412995	104413017	104413142	104413164	104412995	104413164	145_42	42
X_77388108_77388145	29666	2	19	AC	X	38	CTACACGACGCTCTTCCGATCTCGTTAGTTGCTTATTGTGTGTGGT	CAGACGTGTGCTCTTCCGATCTAGGTAAAAGCTCAAGAAAGCGACA	77388108	77388145	77388011	77388034	77388227	77388250	77388011	77388250	145_42	42
X_86648765_86648802	29671	2	19	AC	X	38	CTACACGACGCTCTTCCGATCTCTCTGTTTTCTGGACTCTCCACC	CAGACGTGTGCTCTTCCGATCTTAAGTTAGGATCTGCATACTGCC	86648765	86648802	86648702	86648724	86648882	86648904	86648702	86648904	145_42	42
X_55422559_55422596	29737	2	19	AC	X	38	CTACACGACGCTCTTCCGATCTTGACTTAATGATACGGATGGAGGA	CAGACGTGTGCTCTTCCGATCTAACTAGGCTAGAGGAGAGCACAA	55422559	55422596	55422529	55422552	55422598	55422620	55422529	55422620	145_42	42
X_23217166_23217203	29748	2	19	AC	X	38	CTACACGACGCTCTTCCGATCTTGGCAGAATCAGGATTTGACAGG	CAGACGTGTGCTCTTCCGATCTAAGCCCAGTTGTACTCTCCAGAT	23217166	23217203	23217117	23217139	23217261	23217283	23217117	23217283	145_42	42
X_45046714_45046751	29756	2	19	AC	X	38	CTACACGACGCTCTTCCGATCTTTCCCATCAGAACAATGCAGCTT	CAGACGTGTGCTCTTCCGATCTTTAAGGACACTGCATCTTGAGCC	45046714	45046751	45046627	45046649	45046830	45046852	45046627	45046852	145_42	42
X_71200420_71200457	29761	2	19	AC	X	38	CTACACGACGCTCTTCCGATCTTTGTCAACAACACCTGTGCTCAT	CAGACGTGTGCTCTTCCGATCTCACTGGATTGCAAGTAGGCTTCA	71200420	71200457	71200320	71200342	71200510	71200532	71200320	71200532	145_42	42
X_49933878_49933915	29762	2	19	AC	X	38	CTACACGACGCTCTTCCGATCTTTGTCACCTCCTACACACTTCCT	CAGACGTGTGCTCTTCCGATCTTATATGCTGTTGCCATGGGTGAG	49933878	49933915	49933852	49933874	49933928	49933950	49933852	49933950	145_42	42
X_142678209_142678246	29373	2	19	AC	X	38	CTACACGACGCTCTTCCGATCTAAAGACCAATTGAGATGGGGCTG	CAGACGTGTGCTCTTCCGATCTCTGTGACAGGTTGTAGAACCCAA	142678209	142678246	142678128	142678150	142678258	142678280	142678128	142678280	146_42	42
X_44390494_44390531	29658	2	19	AC	X	38	CTACACGACGCTCTTCCGATCTCCAGAGAGTGAGACTGTTTCCAG	CAGACGTGTGCTCTTCCGATCTGTGTGTCTGGCCAACATGAATCT	44390494	44390531	44390467	44390489	44390545	44390567	44390467	44390567	146_42	42
X_149251958_149251995	29669	2	19	AC	X	38	CTACACGACGCTCTTCCGATCTCTCCCTTTTGGGTTATCAGCAGG	CAGACGTGTGCTCTTCCGATCTCATGTAACTCCAGGCAGCAATCT	149251958	149251995	149251869	149251891	149252080	149252102	149251869	149252102	146_42	42
X_31302943_31302980	29670	2	19	AC	X	38	CTACACGACGCTCTTCCGATCTCTCCTCTGGCCAAGAACTGTTTC	CAGACGTGTGCTCTTCCGATCTAGAGGGACAGGAGGAGAGTGATA	31302943	31302980	31302842	31302864	31303015	31303037	31302842	31303037	146_42	42
X_37674164_37674201	29676	2	19	AC	X	38	CTACACGACGCTCTTCCGATCTCTTTCAGAGAATGGCCAGCTGTT	CAGACGTGTGCTCTTCCGATCTTGGTCAGATTTCCTAGCCTCTGT	37674164	37674201	37674130	37674152	37674281	37674303	37674130	37674303	147_42	42
X_38203494_38203531	29750	2	19	AC	X	38	CTACACGACGCTCTTCCGATCTTGTAAATCAGGAGCTCTTTTGGTGA	CAGACGTGTGCTCTTCCGATCTGACCTGTGTGGAAACTGGCAATA	38203494	38203531	38203458	38203482	38203599	38203621	38203458	38203621	147_42	42
X_3180272_3180309	29755	2	19	AC	X	38	CTACACGACGCTCTTCCGATCTTTCCCACCTAGGTTGCTGCAAAT	CAGACGTGTGCTCTTCCGATCTCCAAATGCCATCAATCAACAGGT	3180272	3180309	3180207	3180229	3180336	3180358	3180207	3180358	147_42	42
X_124245984_124246021	29760	2	19	AC	X	38	CTACACGACGCTCTTCCGATCTTTGTACCAGATAGTAGCAATGTGT	CAGACGTGTGCTCTTCCGATCTATCTGAAACCAAACACCTCTCCC	124245984	124246021	124245946	124245969	124246028	124246050	124245946	124246050	147_42	42
X_11284154_11284191	29342	2	19	AC	X	38	CTACACGACGCTCTTCCGATCTAAATGAGTGAGTGCGTGTGTTTG	CAGACGTGTGCTCTTCCGATCTATTCTTTTTGTCCCTTCCCTCCC	11284154	11284191	11284117	11284139	11284252	11284274	11284117	11284274	148_42	42
X_100303103_100303140	29744	2	19	AC	X	38	CTACACGACGCTCTTCCGATCTTGCCCTTAAGCTCTACCTTGGAT	CAGACGTGTGCTCTTCCGATCTACCTATGTCGTCATCCTCCATGT	100303103	100303140	100303027	100303049	100303184	100303206	100303027	100303206	148_42	42
X_80368879_80368916	29746	2	19	AC	X	38	CTACACGACGCTCTTCCGATCTTGGATCGCTGCAGCCTATTTTAG	CAGACGTGTGCTCTTCCGATCTTCCAGGTAGTTCAGTTTCCTCGT	80368879	80368916	80368798	80368820	80368974	80368996	80368798	80368996	148_42	42
X_124965174_124965211	29372	2	19	AC	X	38	CTACACGACGCTCTTCCGATCTAAACCAAGCCCAAGGCTAGAAAA	CAGACGTGTGCTCTTCCGATCTGGAAAGCCAACTCCTGGATTCAT	124965174	124965211	124965107	124965129	124965251	124965273	124965107	124965273	149_42	42
X_139149214_139149251	29655	2	19	AC	X	38	CTACACGACGCTCTTCCGATCTCAGGCAACTCCAACTCAGTATGT	CAGACGTGTGCTCTTCCGATCTGAAAAGCAGAGCCAACGTTGAAA	139149214	139149251	139149167	139149189	139149323	139149345	139149167	139149345	149_42	42
X_11086657_11086694	29661	2	19	AC	X	38	CTACACGACGCTCTTCCGATCTCCCCTGATATTAGCAGAAAATCAACC	CAGACGTGTGCTCTTCCGATCTACCCGTAACAAGCAGCTAAATGA	11086657	11086694	11086605	11086630	11086744	11086766	11086605	11086766	149_42	42
X_10033358_10033395	29667	2	19	AC	X	38	CTACACGACGCTCTTCCGATCTCTAGGATGGTGTGAAAAGGGGTG	CAGACGTGTGCTCTTCCGATCTGGTTCGTTTTACGTTCCGTGAAG	10033358	10033395	10033254	10033276	10033445	10033467	10033254	10033467	149_42	42
X_33960886_33960923	29673	2	19	AC	X	38	CTACACGACGCTCTTCCGATCTCTGCAACAATAGGAGTGTGTGTG	CAGACGTGTGCTCTTCCGATCTTGCCAAAAATATTCTTTTCTTCTGTC	33960886	33960923	33960872	33960894	33960949	33960974	33960872	33960974	149_42	42
X_42505901_42505938	29740	2	19	AC	X	38	CTACACGACGCTCTTCCGATCTTGCAATGAGGCCATCAAGATTTC	CAGACGTGTGCTCTTCCGATCTACTTGGAAAGAAACCAAACATCCCT	42505901	42505938	42505819	42505841	42506018	42506042	42505819	42506042	149_42	42
X_106693793_106693830	29350	2	19	AC	X	38	CTACACGACGCTCTTCCGATCTACACACAGCCGCACAACATAC	CAGACGTGTGCTCTTCCGATCTTATTAGCATCTTGGTGGGAGGGG	106693793	106693830	106693735	106693755	106693866	106693888	106693735	106693888	150_42	42
X_42920346_42920383	29664	2	19	AC	X	38	CTACACGACGCTCTTCCGATCTCCTTGTGTCTTTGGCTTTGCATT	CAGACGTGTGCTCTTCCGATCTGCCCCCTCTTCCTCTAGAAATCA	42920346	42920383	42920250	42920272	42920389	42920411	42920250	42920411	150_42	42
X_26824057_26824094	29668	2	19	AC	X	38	CTACACGACGCTCTTCCGATCTCTATTAAAGGGTGGTGGGGGAGA	CAGACGTGTGCTCTTCCGATCTGCAATCATCCCCCAACCAAAAAG	26824057	26824094	26823974	26823996	26824142	26824164	26823974	26824164	150_42	42
X_117203073_117203110	29678	2	19	AC	X	38	CTACACGACGCTCTTCCGATCTGAAAACAGGGCCATCCAGAAGAG	CAGACGTGTGCTCTTCCGATCTAGGGGGCAATTTTCAGTTTCAGT	117203073	117203110	117203049	117203071	117203122	117203144	117203049	117203144	150_42	42
X_135405737_135405774	29738	2	19	AC	X	38	CTACACGACGCTCTTCCGATCTTGAGGAGCACATACTGTTTTCTTT	CAGACGTGTGCTCTTCCGATCTGGGTAGCAAAGAATTATGCCTGC	135405737	135405774	135405654	135405677	135405810	135405832	135405654	135405832	150_42	42
X_109460731_109460768	29742	2	19	AC	X	38	CTACACGACGCTCTTCCGATCTTGCCAAACTCTAGAAAACCCCAC	CAGACGTGTGCTCTTCCGATCTAGGCAATCAGAGGTATGTTTGTT	109460731	109460768	109460660	109460682	109460818	109460840	109460660	109460840	150_42	42
X_119449322_119449359	29749	2	19	AC	X	38	CTACACGACGCTCTTCCGATCTTGGTTCAAACGTTCCAAACACAT	CAGACGTGTGCTCTTCCGATCTAGAGCCATCTGGGATGTTAGGTT	119449322	119449359	119449236	119449258	119449390	119449412	119449236	119449412	150_42	42
X_45480327_45480364	29766	2	19	AC	X	38	CTACACGACGCTCTTCCGATCTTTTGGTGGTAACTTTAGCCCGTC	CAGACGTGTGCTCTTCCGATCTCAGTATGCCATGGGCAGTTAAGA	45480327	45480364	45480266	45480288	45480409	45480431	45480266	45480431	150_42	42
X_73123154_73123191	29654	2	19	AC	X	38	CTACACGACGCTCTTCCGATCTCACTACACCCAGCCTAAAGACAA	CAGACGTGTGCTCTTCCGATCTCAAACCCTGAGTGTGGGTGTTTA	73123154	73123191	73123052	73123074	73123203	73123225	73123052	73123225	151_42	42
X_122028899_122028936	29662	2	19	AC	X	38	CTACACGACGCTCTTCCGATCTCCTCCAGGAAAAGTTACTGAGCC	CAGACGTGTGCTCTTCCGATCTAAATTCAGAGGCTACTGTCTGGC	122028899	122028936	122028809	122028831	122028966	122028988	122028809	122028988	151_42	42
X_144443009_144443046	29665	2	19	AC	X	38	CTACACGACGCTCTTCCGATCTCGGAGAGCATGGTGACAATAGTT	CAGACGTGTGCTCTTCCGATCTTCTTCTCACATGGTAACATTTTCCT	144443009	144443046	144442927	144442949	144443048	144443072	144442927	144443072	151_42	42
X_32375778_32375815	29674	2	19	AC	X	38	CTACACGACGCTCTTCCGATCTCTGCAATAGCTCCCGAACTTCAT	CAGACGTGTGCTCTTCCGATCTCAGTGTGAAGAGGTCATGGACAG	32375778	32375815	32375687	32375709	32375873	32375895	32375687	32375895	151_42	42
X_85152312_85152349	29736	2	19	AC	X	38	CTACACGACGCTCTTCCGATCTTGAAATAGAAAATGCTTGTGTGTGC	CAGACGTGTGCTCTTCCGATCTTTATTGCCTGCTCTCTCTCCTGT	85152312	85152349	85152287	85152311	85152403	85152425	85152287	85152425	151_42	42
X_125575014_125575051	29741	2	19	AC	X	38	CTACACGACGCTCTTCCGATCTTGCATGCATTCAATTCACCTCAAAA	CAGACGTGTGCTCTTCCGATCTTCACTCCCATGAGTATTGAAGCAC	125575014	125575051	125574951	125574975	125575100	125575123	125574951	125575123	151_42	42
X_64862215_64862252	29751	2	19	AC	X	38	CTACACGACGCTCTTCCGATCTTTAATTGGCATGCAAAGATGCCC	CAGACGTGTGCTCTTCCGATCTCTCTGCCCAATGTACCTCCTTTC	64862215	64862252	64862132	64862154	64862290	64862312	64862132	64862312	151_42	42
X_124590558_124590595	29758	2	19	AC	X	38	CTACACGACGCTCTTCCGATCTTTCTCCAGAGAACAGAACTGATAA	CAGACGTGTGCTCTTCCGATCTCAAGCCTTTGTAATGGTGAGACC	124590558	124590595	124590533	124590556	124590639	124590661	124590533	124590661	151_42	42
X_142160727_142160764	29374	2	19	AC	X	38	CTACACGACGCTCTTCCGATCTAAAGGTAGAACCTCTGACAGCCT	CAGACGTGTGCTCTTCCGATCTTTAACTTCCCTCCGTGATCCCAT	142160727	142160764	142160678	142160700	142160837	142160859	142160678	142160859	152_42	42
X_45736170_45736207	29739	2	19	AC	X	38	CTACACGACGCTCTTCCGATCTTGAGTAGTGCAATGGAGTGATGC	CAGACGTGTGCTCTTCCGATCTTTTTAGCAAGGTCTCTGTGCAGG	45736170	45736207	45736120	45736142	45736235	45736257	45736120	45736257	152_42	42
X_37257231_37257268	29763	2	19	AC	X	38	CTACACGACGCTCTTCCGATCTTTTAGTTTGGGATGGGGACCTGA	CAGACGTGTGCTCTTCCGATCTTGGTCCCTTCTTTCAGCGTGTAT	37257231	37257268	37257158	37257180	37257269	37257291	37257158	37257291	152_42	42
X_35538918_35538955	29627	2	19	AC	X	38	CTACACGACGCTCTTCCGATCTACCATGCAAACAAAAAGACAATGGA	CAGACGTGTGCTCTTCCGATCTATGCTTGTTTGCTGAGAAAGGCT	35538918	35538955	35538874	35538898	35539011	35539033	35538874	35539033	153_42	42
X_46426399_46426436	29675	2	19	AC	X	38	CTACACGACGCTCTTCCGATCTCTTCCCACAGCAGCAACAATGTA	CAGACGTGTGCTCTTCCGATCTGAAATCGCCTAACAACGCATTCC	46426399	46426436	46426323	46426345	46426480	46426502	46426323	46426502	153_42	42
X_139631844_139631881	29745	2	19	AC	X	38	CTACACGACGCTCTTCCGATCTTGGAGGTCTGATTTAATGGCAGC	CAGACGTGTGCTCTTCCGATCTCTACTGTGCCCTACTCCATTCCA	139631844	139631881	139631790	139631812	139631904	139631926	139631790	139631926	153_42	42
X_9134451_9134488	29747	2	19	AC	X	38	CTACACGACGCTCTTCCGATCTTGGATTGCCATGTAGTTTTAACTTGC	CAGACGTGTGCTCTTCCGATCTCATCCCTGTCACCCTGAATAAGC	9134451	9134488	9134366	9134391	9134552	9134574	9134366	9134574	153_42	42
X_77629134_77629171	29753	2	19	AC	X	38	CTACACGACGCTCTTCCGATCTTTAGTGGGGCCTAGAATCAACCA	CAGACGTGTGCTCTTCCGATCTAATTTCCATGACCACCCAGACAG	77629134	77629171	77629043	77629065	77629200	77629222	77629043	77629222	153_42	42
X_107218819_107218856	29764	2	19	AC	X	38	CTACACGACGCTCTTCCGATCTTTTATCCTTCCCAGACAACAGGC	CAGACGTGTGCTCTTCCGATCTAAACCACATCCACACAGTGACAA	107218819	107218856	107218783	107218805	107218868	107218890	107218783	107218890	153_42	42
X_9801649_9801686	29672	2	19	AC	X	38	CTACACGACGCTCTTCCGATCTCTGAAGGACTCCACTGACAATGA	CAGACGTGTGCTCTTCCGATCTGTAGTTCTGGCTGTCTGGAGTTG	9801649	9801686	9801606	9801628	9801721	9801743	9801606	9801743	154_42	42
X_146198748_146198785	29677	2	19	AC	X	38	CTACACGACGCTCTTCCGATCTCTTTGCAAGTCAGCTTAATCCGT	CAGACGTGTGCTCTTCCGATCTCAAAATGCGGCCAGTACTTTACC	146198748	146198785	146198679	146198701	146198814	146198836	146198679	146198836	154_42	42
X_85231880_85231917	29759	2	19	AC	X	38	CTACACGACGCTCTTCCGATCTTTGCCTCTAGCAGATACCCCTTT	CAGACGTGTGCTCTTCCGATCTAGCACTCACTGACTTAAAAGCCT	85231880	85231917	85231810	85231832	85231960	85231982	85231810	85231982	154_42	42
X_98878500_98878537	29765	2	19	AC	X	38	CTACACGACGCTCTTCCGATCTTTTATCCTTCTGTGTGTTGAGCA	CAGACGTGTGCTCTTCCGATCTAGGGTTGAAGAGGATGTAGTGACA	98878500	98878537	98878444	98878466	98878541	98878564	98878444	98878564	154_42	42
X_82757278_82757315	29371	2	19	AC	X	38	CTACACGACGCTCTTCCGATCTAAAAATGCGTTCCCCAAATGTCC	CAGACGTGTGCTCTTCCGATCTAGAGAAGGGGCTGCTGATGATTA	82757278	82757315	82757210	82757232	82757393	82757415	82757210	82757415	155_42	42
X_95170577_95170614	29659	2	19	AC	X	38	CTACACGACGCTCTTCCGATCTCCAGCTTATGTCTGTTGTGTGTG	CAGACGTGTGCTCTTCCGATCTTGCTATGTGAATTTGGGGGAAGG	95170577	95170614	95170552	95170574	95170624	95170646	95170552	95170646	155_42	42
X_93581772_93581809	29660	2	19	AC	X	38	CTACACGACGCTCTTCCGATCTCCAGGACAAAATAGGTCAGAAGGT	CAGACGTGTGCTCTTCCGATCTTAAATGCTAGAGAACTGGAGCCG	93581772	93581809	93581748	93581771	93581863	93581885	93581748	93581885	155_42	42
X_7462611_7462648	29754	2	19	AC	X	38	CTACACGACGCTCTTCCGATCTTTCCATTCCTTCTGTCTCCACAC	CAGACGTGTGCTCTTCCGATCTCACCTATCTGCTATAGTGAGCTGT	7462611	7462648	7462527	7462549	7462681	7462704	7462527	7462704	155_42	42
X_28562794_28562831	29757	2	19	AC	X	38	CTACACGACGCTCTTCCGATCTTTCCTTCTTTGTTGTTCCCTCCA	CAGACGTGTGCTCTTCCGATCTCCACTAATACAGGCTTGCCCAAT	28562794	28562831	28562693	28562715	28562896	28562918	28562693	28562918	155_42	42
X_30418579_30418616	29657	2	19	AC	X	38	CTACACGACGCTCTTCCGATCTCATTCTTTTAAACATTTATCTCGTGGT	CAGACGTGTGCTCTTCCGATCTGAAGTATGGTACGAGTGGCAAGA	30418579	30418616	30418495	30418521	30418694	30418716	30418495	30418716	156_42	11
X_28832459_28832496	29743	2	19	AC	X	38	CTACACGACGCTCTTCCGATCTTGCCACAGACTCCCACTATTCTA	CAGACGTGTGCTCTTCCGATCTATGAGCTCTATGGACCATTCCCT	28832459	28832496	28832362	28832384	28832560	28832582	28832362	28832582	156_42	11
X_41969935_41969972	29435	2	19	AC	X	38	CTACACGACGCTCTTCCGATCTATCTTCATGCCACTCTGTTGGTC	CAGACGTGTGCTCTTCCGATCTTGTGCCCTCAGGTTATTCTACCT	41969935	41969972	41969856	41969878	41970012	41970034	41969856	41970034	97_40	40
X_68008110_68008147	29455	2	19	AG	X	38	CTACACGACGCTCTTCCGATCTACACAACCTGGGCACTTGAAATA	CAGACGTGTGCTCTTCCGATCTCTCTTTGGTAGGACTCTGGGGTT	68008110	68008147	68008025	68008047	68008216	68008238	68008025	68008238	97_40	40
X_138310525_138310562	29457	2	19	AG	X	38	CTACACGACGCTCTTCCGATCTAAAGCTCAAGGTGGGAAAGATGG	CAGACGTGTGCTCTTCCGATCTACTGATGAATGCTCAGACTGGGA	138310525	138310562	138310387	138310409	138310566	138310588	138310387	138310588	97_40	40
X_5908119_5908156	29458	2	19	AG	X	38	CTACACGACGCTCTTCCGATCTAAATCACAGATAACGGGGGTTGG	CAGACGTGTGCTCTTCCGATCTTATTTTGTCTTCGCCGCTTGTTG	5908119	5908156	5908063	5908085	5908179	5908201	5908063	5908201	97_40	40
X_4253632_4253669	29459	2	19	AG	X	38	CTACACGACGCTCTTCCGATCTACAGAGACCCTCTCTCTCTTCTC	CAGACGTGTGCTCTTCCGATCTACAGGTCCTCTTGGTACAATGTAAT	4253632	4253669	4253599	4253621	4253750	4253774	4253599	4253774	97_40	40
X_32474696_32474733	29683	2	19	AC	X	38	CTACACGACGCTCTTCCGATCTAAGGCAGTTGGTGAAGCTACAAA	CAGACGTGTGCTCTTCCGATCTCCAAATGCTGTCGTTTTTGCCT	32474696	32474733	32474605	32474627	32474799	32474820	32474605	32474820	99_40	40
X_32920276_32920313	29684	2	19	AC	X	38	CTACACGACGCTCTTCCGATCTACGAATGTTAAGAGTGCAATAGCAAA	CAGACGTGTGCTCTTCCGATCTAAATGTCCATGTTTCTGCGTGTG	32920276	32920313	32920195	32920220	32920309	32920331	32920195	32920331	99_40	40
X_8387028_8387065	29685	2	19	AC	X	38	CTACACGACGCTCTTCCGATCTATTGCATTATGCTGCACTGTGTG	CAGACGTGTGCTCTTCCGATCTAGGCTCAATTGTTTTGAGCAGCA	8387028	8387065	8387011	8387033	8387138	8387160	8387011	8387160	99_40	40
X_9577377_9577414	29686	2	19	AC	X	38	CTACACGACGCTCTTCCGATCTCCAGCATTTTGGTGGTGTGTTTT	CAGACGTGTGCTCTTCCGATCTTCAAGTGGAAGGGGCATACTACA	9577377	9577414	9577347	9577369	9577493	9577515	9577347	9577515	99_40	40
X_48045802_48045839	29687	2	19	AC	X	38	CTACACGACGCTCTTCCGATCTGAAAAGCAGTTGGGAGATGCCTA	CAGACGTGTGCTCTTCCGATCTACAACACTACCCTCCTCTCTTCC	48045802	48045839	48045767	48045789	48045949	48045971	48045767	48045971	99_40	40
X_125588607_125588644	29688	2	19	AC	X	38	CTACACGACGCTCTTCCGATCTGAAACAGCATGCTTACAAACCCA	CAGACGTGTGCTCTTCCGATCTTCAACTTATCTTTCAACACCCAGA	125588607	125588644	125588575	125588597	125588711	125588734	125588575	125588734	99_40	40
X_45613377_45613414	29689	2	19	AC	X	38	CTACACGACGCTCTTCCGATCTGAAGAAAGAGGTCAGGGGAGGTA	CAGACGTGTGCTCTTCCGATCTTATTGCCATTCACACTCCACCAG	45613377	45613414	45613295	45613317	45613426	45613448	45613295	45613448	99_40	40
X_8169221_8169258	29690	2	19	AC	X	38	CTACACGACGCTCTTCCGATCTGAATTGGTTAGGGAGATGCTGGG	CAGACGTGTGCTCTTCCGATCTGCTCTCCATTTTCGCTCACACAT	8169221	8169258	8169160	8169182	8169334	8169356	8169160	8169356	99_40	40
X_77576634_77576671	29691	2	19	AC	X	38	CTACACGACGCTCTTCCGATCTGAGCATCTAATTTCCCAGGGTGG	CAGACGTGTGCTCTTCCGATCTTTCTTGCATAACAGCACCTGCAC	77576634	77576671	77576585	77576607	77576674	77576696	77576585	77576696	99_40	40
X_5749946_5749983	29692	2	19	AC	X	38	CTACACGACGCTCTTCCGATCTGAGGAGTTTCTCTGCCTTCAAGA	CAGACGTGTGCTCTTCCGATCTCCTGCCACGGAATAAATCAGAGT	5749946	5749983	5749840	5749862	5750024	5750046	5749840	5750046	99_40	40
X_65262961_65262998	29693	2	19	AC	X	38	CTACACGACGCTCTTCCGATCTGAGGGAAGCAGTGGTACAAAGAG	CAGACGTGTGCTCTTCCGATCTCACGTTTGTGCTTAAGGCCATATT	65262961	65262998	65262912	65262934	65263078	65263101	65262912	65263101	99_40	40
X_29140527_29140564	29694	2	19	AC	X	38	CTACACGACGCTCTTCCGATCTGAGTTAATTACTCTGAACAATTCCACA	CAGACGTGTGCTCTTCCGATCTCAAAGAAAGAAGTGTGTGTGGGTG	29140527	29140564	29140437	29140463	29140587	29140610	29140437	29140610	99_40	40
X_20642952_20642989	29695	2	19	AC	X	38	CTACACGACGCTCTTCCGATCTGATTAAGTCTGCCCAACCAGGAG	CAGACGTGTGCTCTTCCGATCTAGCACACCCTAAAAATAGCCTAGA	20642952	20642989	20642874	20642896	20643031	20643054	20642874	20643054	99_40	40
X_116241353_116241390	29696	2	19	AC	X	38	CTACACGACGCTCTTCCGATCTGATTCTGAGAGCAAGCTGGAACA	CAGACGTGTGCTCTTCCGATCTACACTGCCTTTGACATACTGCAT	116241353	116241390	116241261	116241283	116241472	116241494	116241261	116241494	100_40	40
X_121974739_121974776	29697	2	19	AC	X	38	CTACACGACGCTCTTCCGATCTGCACCAAAGTCTCTCTCTCCTCT	CAGACGTGTGCTCTTCCGATCTACAACTGACATACCATCTCTGGC	121974739	121974776	121974678	121974700	121974787	121974809	121974678	121974809	100_40	40
X_109132138_109132175	29698	2	19	AC	X	38	CTACACGACGCTCTTCCGATCTGCACTGTGAATAGACTTAATGCCAC	CAGACGTGTGCTCTTCCGATCTAGTGTCTGACAACTGATGTGTGT	109132138	109132175	109132057	109132081	109132178	109132200	109132057	109132200	100_40	40
X_107441003_107441040	29699	2	19	AC	X	38	CTACACGACGCTCTTCCGATCTGCCCAGGGTTTTTCATTTCTGTTT	CAGACGTGTGCTCTTCCGATCTAGAACAGGTAAGTACGGGACCAA	107441003	107441040	107440912	107440935	107441063	107441085	107440912	107441085	100_40	40
X_105936592_105936629	29700	2	19	AC	X	38	CTACACGACGCTCTTCCGATCTGCCTGCTAAGAAAACACACACAC	CAGACGTGTGCTCTTCCGATCTCAACCAGTTCAGCCTGGAGTAAG	105936592	105936629	105936579	105936601	105936726	105936748	105936579	105936748	100_40	40
X_30284344_30284381	29701	2	19	AC	X	38	CTACACGACGCTCTTCCGATCTGCTCTGCCACTTCTATTCAGACT	CAGACGTGTGCTCTTCCGATCTTCAGCTCAATTAACCAGGATGGA	30284344	30284381	30284271	30284293	30284413	30284435	30284271	30284435	100_40	40
X_30324695_30324732	29702	2	19	AC	X	38	CTACACGACGCTCTTCCGATCTGCTGGTTAAACTCATATTGAGAGAGGA	CAGACGTGTGCTCTTCCGATCTGGGATATAAAGGTGAGAGGGGCT	30324695	30324732	30324637	30324663	30324807	30324829	30324637	30324829	100_40	40
X_110646011_110646048	29703	2	19	AC	X	38	CTACACGACGCTCTTCCGATCTGCTTTGCCATAGCACCAAATCCT	CAGACGTGTGCTCTTCCGATCTAGATAGAACTCTGGGACTGAGGG	110646011	110646048	110645872	110645894	110646103	110646125	110645872	110646125	100_40	40
X_56828411_56828448	29704	2	19	AC	X	38	CTACACGACGCTCTTCCGATCTGGAAACCCCGACAACCACAAATA	CAGACGTGTGCTCTTCCGATCTGTCTGTGTGGGTGAATGCTTGAG	56828411	56828448	56828305	56828327	56828478	56828500	56828305	56828500	100_40	40
X_27360635_27360672	29705	2	19	AC	X	38	CTACACGACGCTCTTCCGATCTGGACACATGTATGCACTTTCCCA	CAGACGTGTGCTCTTCCGATCTAATCAAGGGAATGATCAACACCA	27360635	27360672	27360561	27360583	27360683	27360705	27360561	27360705	100_40	40
X_137958158_137958195	29706	2	19	AC	X	38	CTACACGACGCTCTTCCGATCTGGACTTGCATACCTGCATAACCA	CAGACGTGTGCTCTTCCGATCTGGCAAGTGGTCCCTTTATGTGTT	137958158	137958195	137958097	137958119	137958258	137958280	137958097	137958280	100_40	40
X_44391012_44391049	29707	2	19	AC	X	38	CTACACGACGCTCTTCCGATCTGGAGGGGGAACAAAACACCTTAG	CAGACGTGTGCTCTTCCGATCTGCTCTTTCAGTTGTGCATTGTCT	44391012	44391049	44390957	44390979	44391088	44391110	44390957	44391110	100_40	40
X_110813526_110813563	29708	2	19	AC	X	38	CTACACGACGCTCTTCCGATCTGGCATCCATTTTTGGTCTTCTGC	CAGACGTGTGCTCTTCCGATCTTTGTCCCACATGGTCTAAGTCCT	110813526	110813563	110813447	110813469	110813609	110813631	110813447	110813631	100_40	40
X_96030353_96030390	29709	2	19	AC	X	38	CTACACGACGCTCTTCCGATCTGGCCTCAGAAGTGGAAATGCTAC	CAGACGTGTGCTCTTCCGATCTGCACCACCAAAACTGAGGAAGTA	96030353	96030390	96030278	96030300	96030393	96030415	96030278	96030415	100_40	40
X_119677351_119677388	29710	2	19	AC	X	38	CTACACGACGCTCTTCCGATCTGGCCTGAAGAGTTTAAAGGTCACA	CAGACGTGTGCTCTTCCGATCTGTTTTCAGGTGTGATTTGAAGTGT	119677351	119677388	119677292	119677315	119677472	119677495	119677292	119677495	100_40	40
X_106342921_106342958	29711	2	19	AC	X	38	CTACACGACGCTCTTCCGATCTGGCTCAGACTCTTAAAATGACATCCT	CAGACGTGTGCTCTTCCGATCTGCTTTAGAACAGTTCCCCGAACA	106342921	106342958	106342888	106342913	106342979	106343001	106342888	106343001	100_40	40
X_140528779_140528816	29712	2	19	AC	X	38	CTACACGACGCTCTTCCGATCTGGCTCTATTCCATTACTACGGGG	CAGACGTGTGCTCTTCCGATCTAGGAAAACGGGTATGAAGGAGGA	140528779	140528816	140528752	140528774	140528898	140528920	140528752	140528920	100_40	40
X_41147882_41147919	29713	2	19	AC	X	38	CTACACGACGCTCTTCCGATCTGGGAATGAGTAGGATGCGTTCAA	CAGACGTGTGCTCTTCCGATCTCTCCTACAGAGCAGTTCACTGGG	41147882	41147919	41147777	41147799	41147969	41147991	41147777	41147991	100_40	40
X_64085230_64085267	29714	2	19	AC	X	38	CTACACGACGCTCTTCCGATCTGGGGCGCCACCATTTTAATACTT	CAGACGTGTGCTCTTCCGATCTTGACTGGTCAGTGTCTATGCTGT	64085230	64085267	64085179	64085201	64085327	64085349	64085179	64085349	100_40	40
X_150917784_150917821	29715	2	19	AC	X	38	CTACACGACGCTCTTCCGATCTGGTCTGCAAGTGTCTGTTTAGCA	CAGACGTGTGCTCTTCCGATCTCAGAGAAAACAACCGGAGAGAGG	150917784	150917821	150917679	150917701	150917897	150917919	150917679	150917919	100_40	40
X_140917172_140917209	29716	2	19	AC	X	38	CTACACGACGCTCTTCCGATCTGGTGGTTTCTGGCTAATTTGGGA	CAGACGTGTGCTCTTCCGATCTACCAAGTTAGGAGTCTCCGTGAT	140917172	140917209	140917067	140917089	140917275	140917297	140917067	140917297	100_40	40
X_142838664_142838701	29717	2	19	AC	X	38	CTACACGACGCTCTTCCGATCTGTCAGCCTTGGCAAAACACATTC	CAGACGTGTGCTCTTCCGATCTCCCAGACACTGGACTATAGCGAA	142838664	142838701	142838569	142838591	142838774	142838796	142838569	142838796	100_40	40
X_154104012_154104049	29718	2	19	AC	X	38	CTACACGACGCTCTTCCGATCTGTCAGCTGTGAAAGAGTACTGGG	CAGACGTGTGCTCTTCCGATCTTCAAGGTGTCAAATCCCACGTTT	154104012	154104049	154103937	154103959	154104127	154104149	154103937	154104149	100_40	40
X_102512716_102512753	29719	2	19	AC	X	38	CTACACGACGCTCTTCCGATCTGTGATCTCTCCCTCCTCTGTCAT	CAGACGTGTGCTCTTCCGATCTAAAGAAGCGTAATAGCTGGAGCC	102512716	102512753	102512631	102512653	102512820	102512842	102512631	102512842	100_40	40
X_64876133_64876170	29720	2	19	AC	X	38	CTACACGACGCTCTTCCGATCTGTGTTTACCTAAGGCAGACTGGG	CAGACGTGTGCTCTTCCGATCTCCCCTTCACATTGCCTCAACTTA	64876133	64876170	64876086	64876108	64876254	64876276	64876086	64876276	100_40	40
X_86121007_86121044	29721	2	19	AC	X	38	CTACACGACGCTCTTCCGATCTGTTACCAACTGAGGACTGTAACTG	CAGACGTGTGCTCTTCCGATCTACATGATACAGAAATAAGAGAGGAAAG	86121007	86121044	86120951	86120974	86121068	86121094	86120951	86121094	100_40	40
X_153381433_153381470	29722	2	19	AC	X	38	CTACACGACGCTCTTCCGATCTGTTGCCATTGCAGTGTGTGTATT	CAGACGTGTGCTCTTCCGATCTGTCTCTCCAGCCAGAAAGAGTTT	153381433	153381470	153381391	153381413	153381539	153381561	153381391	153381561	100_40	40
X_105559429_105559466	29723	2	19	AC	X	38	CTACACGACGCTCTTCCGATCTTAATCTCTCTGTCCTTTGCCCCA	CAGACGTGTGCTCTTCCGATCTCCACAAAATGAGAAAGGCCTTCAA	105559429	105559466	105559366	105559388	105559509	105559532	105559366	105559532	100_40	40
X_43737655_43737692	29724	2	19	AC	X	38	CTACACGACGCTCTTCCGATCTTACAGGTGCACTCCTCTATACCC	CAGACGTGTGCTCTTCCGATCTTATCTTGGAAGGTTGAGACGGGA	43737655	43737692	43737626	43737648	43737752	43737774	43737626	43737774	100_40	40
X_8854131_8854168	29725	2	19	AC	X	38	CTACACGACGCTCTTCCGATCTTACCAACAGATGAGGATCCCTGG	CAGACGTGTGCTCTTCCGATCTAATGCTCTACATGCAGGCTTACT	8854131	8854168	8854081	8854103	8854186	8854208	8854081	8854208	100_40	40
X_150936149_150936186	29726	2	19	AC	X	38	CTACACGACGCTCTTCCGATCTTAGGGCTTGAAAGATGGACCTGA	CAGACGTGTGCTCTTCCGATCTGGCTTGCTCTCTGTGTCTCTTAG	150936149	150936186	150936106	150936128	150936238	150936260	150936106	150936260	100_40	40
X_6032563_6032600	29727	2	19	AC	X	38	CTACACGACGCTCTTCCGATCTTAGTCTCTGCAAAGTCAGCCTCT	CAGACGTGTGCTCTTCCGATCTAGCAGGTGTATGTGTGCATGTTT	6032563	6032600	6032523	6032545	6032601	6032623	6032523	6032623	100_40	40
X_51567959_51567996	29728	2	19	AC	X	38	CTACACGACGCTCTTCCGATCTTATGCACAGACACACACAGTCTC	CAGACGTGTGCTCTTCCGATCTGAGGGGCTCAAGAGCAGATTTAC	51567959	51567996	51567929	51567951	51568066	51568088	51567929	51568088	100_40	40
X_50571897_50571934	29729	2	19	AC	X	38	CTACACGACGCTCTTCCGATCTTATGTTGGGCAGCAAAAGCACTA	CAGACGTGTGCTCTTCCGATCTTGAGAGCACCTACTAGAAGCCAA	50571897	50571934	50571794	50571816	50572009	50572031	50571794	50572031	100_40	40
X_143504393_143504430	29730	2	19	AC	X	38	CTACACGACGCTCTTCCGATCTTCAAAGCTGATATTCAGGTTGCT	CAGACGTGTGCTCTTCCGATCTACGGTTTCAAACAATGTGCTGAC	143504393	143504430	143504327	143504349	143504444	143504466	143504327	143504466	100_40	40
X_126174176_126174213	29731	2	19	AC	X	38	CTACACGACGCTCTTCCGATCTTCAACAAATTCCAGGTTATGTCAGA	CAGACGTGTGCTCTTCCGATCTCCCAAACTGTGGAAATTGCTTCC	126174176	126174213	126174120	126174144	126174225	126174247	126174120	126174247	100_40	40
X_81840992_81841029	29732	2	19	AC	X	38	CTACACGACGCTCTTCCGATCTTCCCCATAAATTAACTCAAAGTTTGCT	CAGACGTGTGCTCTTCCGATCTCAATAACAGCTTCCTCCCACCTC	81840992	81841029	81840905	81840931	81841042	81841064	81840905	81841064	100_40	40
X_80681844_80681881	29733	2	19	AC	X	38	CTACACGACGCTCTTCCGATCTTCCTCCACAGGTACAAATTTCTATGG	CAGACGTGTGCTCTTCCGATCTAAGCTCAAGCTGTCAACCTGAAA	80681844	80681881	80681786	80681811	80681929	80681951	80681786	80681951	100_40	40
X_27541527_27541564	29734	2	19	AC	X	38	CTACACGACGCTCTTCCGATCTTCTAGCTAGCTTTCTGTCTACTG	CAGACGTGTGCTCTTCCGATCTGCCTTTGGATAATTAACCCATTGCTA	27541527	27541564	27541503	27541525	27541566	27541591	27541503	27541591	100_40	40
X_88147135_88147172	29735	2	19	AC	X	38	CTACACGACGCTCTTCCGATCTTCTGGAGGGGCAAAGAACTATCA	CAGACGTGTGCTCTTCCGATCTATGACAGAAGCGAGCAAGAACAT	88147135	88147172	88147068	88147090	88147216	88147238	88147068	88147238	100_40	40
X_29357193_29357230	29609	2	19	AC	X	38	CTACACGACGCTCTTCCGATCTAAATAATATGTTCGGCCCACCCG	CAGACGTGTGCTCTTCCGATCTTCCAATATGTCAAGTTGCCTTTCT	29357193	29357230	29357117	29357139	29357300	29357323	29357117	29357323	121_40	40
X_148168023_148168060	29610	2	19	AC	X	38	CTACACGACGCTCTTCCGATCTAACATCACTTGTTCCCCAAGACC	CAGACGTGTGCTCTTCCGATCTTGGGGAAAGTCTCATCTTGCCTA	148168023	148168060	148167988	148168010	148168130	148168152	148167988	148168152	121_40	40
X_68325334_68325371	29611	2	19	AC	X	38	CTACACGACGCTCTTCCGATCTAACCTGCCATGTGGTCTTCATTT	CAGACGTGTGCTCTTCCGATCTTGATTTAAGTCCCAAGCTCAGCC	68325334	68325371	68325303	68325325	68325421	68325443	68325303	68325443	121_40	40
X_23341521_23341558	29612	2	19	AC	X	38	CTACACGACGCTCTTCCGATCTAACGGGGCAATGAAAGAATGAGT	CAGACGTGTGCTCTTCCGATCTACTCCATACACAAGGCCCCTATT	23341521	23341558	23341424	23341446	23341594	23341616	23341424	23341616	121_40	40
X_115771537_115771574	29613	2	19	AC	X	38	CTACACGACGCTCTTCCGATCTAAGACTTTTCAGTGCTCTGGAGG	CAGACGTGTGCTCTTCCGATCTAGCATAAGCTCCTTTGCCTTTGT	115771537	115771574	115771502	115771524	115771579	115771601	115771502	115771601	122_40	40
X_38908262_38908299	29614	2	19	AC	X	38	CTACACGACGCTCTTCCGATCTAAGGTTCTAGGGACACTCCCTTC	CAGACGTGTGCTCTTCCGATCTTCAAGTATGGCCCCATCTGAGAA	38908262	38908299	38908236	38908258	38908357	38908379	38908236	38908379	122_40	40
X_13305371_13305408	29615	2	19	AC	X	38	CTACACGACGCTCTTCCGATCTAAGTAAAGCTGCTCCAAAGGCTC	CAGACGTGTGCTCTTCCGATCTCACCAAGAACCATAAACCGAGGA	13305371	13305408	13305315	13305337	13305431	13305453	13305315	13305453	122_40	40
X_117359358_117359395	29617	2	19	AC	X	38	CTACACGACGCTCTTCCGATCTAAGTCTTGGGCAATTTGTGGTCA	CAGACGTGTGCTCTTCCGATCTAAAGGAAAGGGCTTCTTGCTGAA	117359358	117359395	117359282	117359304	117359406	117359428	117359282	117359428	122_40	40
X_97532047_97532084	29618	2	19	AC	X	38	CTACACGACGCTCTTCCGATCTACAAACATGGGCATGTATCACCT	CAGACGTGTGCTCTTCCGATCTACACAGAAGTAGAATTGCCGAGT	97532047	97532084	97531955	97531977	97532092	97532114	97531955	97532114	122_40	40
X_105639156_105639193	29619	2	19	AC	X	38	CTACACGACGCTCTTCCGATCTACAAATGAACTCCCCGCAAATCT	CAGACGTGTGCTCTTCCGATCTTAGCAGATAGCACTGCAGTTTCC	105639156	105639193	105639128	105639150	105639219	105639241	105639128	105639241	122_40	40
X_20316603_20316640	29620	2	19	AC	X	38	CTACACGACGCTCTTCCGATCTACACATACCAGTGGACAGAGTCA	CAGACGTGTGCTCTTCCGATCTGGGCATTGACTTTGGTAACCATC	20316603	20316640	20316531	20316553	20316658	20316680	20316531	20316680	122_40	40
X_35536063_35536100	29621	2	19	AC	X	38	CTACACGACGCTCTTCCGATCTACAGGGCAATATCTAGGCTTTATT	CAGACGTGTGCTCTTCCGATCTCTTCTGGAGAGGCAAGAACTGAG	35536063	35536100	35535957	35535980	35536146	35536168	35535957	35536168	122_40	40
X_15941382_15941419	29623	2	19	AC	X	38	CTACACGACGCTCTTCCGATCTACATACATACTACCTCGCATAGTTCC	CAGACGTGTGCTCTTCCGATCTAATTTGCTAGCAGGGTAGATCCG	15941382	15941419	15941356	15941381	15941433	15941455	15941356	15941455	122_40	40
X_15221433_15221470	29624	2	19	AC	X	38	CTACACGACGCTCTTCCGATCTACATTGAATTTAGAGTTTTTCTCATGC	CAGACGTGTGCTCTTCCGATCTGCTACGAGTGAATACTTGGGTGA	15221433	15221470	15221373	15221399	15221548	15221570	15221373	15221570	122_40	40
X_143424308_143424345	29625	2	19	AC	X	38	CTACACGACGCTCTTCCGATCTACCAAAAATATGAAACTCACCTCCT	CAGACGTGTGCTCTTCCGATCTACTCACTTTGCTTTCCATTTGCAC	143424308	143424345	143424278	143424302	143424379	143424402	143424278	143424402	122_40	40
X_87826023_87826060	29626	2	19	AC	X	38	CTACACGACGCTCTTCCGATCTACCAAGATGTGTATTTTGCATGT	CAGACGTGTGCTCTTCCGATCTGTTGGAGAATGATGGTCCAGAGT	87826023	87826060	87825960	87825982	87826089	87826111	87825960	87826111	122_40	40
X_84263542_84263579	29628	2	19	AC	X	38	CTACACGACGCTCTTCCGATCTACCCTTGAGGGTTATCCATGTTG	CAGACGTGTGCTCTTCCGATCTGTGTCTAATCGAAGTGTCTGCCA	84263542	84263579	84263468	84263490	84263611	84263633	84263468	84263633	122_40	40
X_92763558_92763595	29629	2	19	AC	X	38	CTACACGACGCTCTTCCGATCTACCTTTCCCTATTTGACGATGACA	CAGACGTGTGCTCTTCCGATCTTCAAATTAGCTTTTTGCTGGGTTGA	92763558	92763595	92763498	92763521	92763645	92763669	92763498	92763669	122_40	40
X_74266898_74266935	29630	2	19	AC	X	38	CTACACGACGCTCTTCCGATCTACCTTTTCAACTCCAGAATTTCCA	CAGACGTGTGCTCTTCCGATCTAGAAGTGGCCCAGATGACTTTTG	74266898	74266935	74266867	74266890	74266970	74266992	74266867	74266992	122_40	40
X_96453265_96453302	29631	2	19	AC	X	38	CTACACGACGCTCTTCCGATCTACGTTCCTGGTCAAATCAGTGAG	CAGACGTGTGCTCTTCCGATCTACAATGGACAAGTTTAGCTTAAAGGG	96453265	96453302	96453218	96453240	96453382	96453407	96453218	96453407	122_40	40
X_126342911_126342948	29632	2	19	AC	X	38	CTACACGACGCTCTTCCGATCTACTATTGAACCAACCAAAATGGCA	CAGACGTGTGCTCTTCCGATCTTGCATAATTACTTTTCACACATACACG	126342911	126342948	126342856	126342879	126342949	126342975	126342856	126342975	122_40	40
X_38518255_38518292	29633	2	19	AC	X	38	CTACACGACGCTCTTCCGATCTACTCCTCTCCCGCTTCTTAACTT	CAGACGTGTGCTCTTCCGATCTGTGCTTTGAACTCTCTCTAGGCA	38518255	38518292	38518171	38518193	38518365	38518387	38518171	38518387	122_40	40
X_127324487_127324524	29634	2	19	AC	X	38	CTACACGACGCTCTTCCGATCTACTTGCAACTTTGCAGAATTTGTTT	CAGACGTGTGCTCTTCCGATCTTTATCTCTGTCCACTGGTCCCAC	127324487	127324524	127324447	127324471	127324554	127324576	127324447	127324576	122_40	40
X_147533783_147533820	29635	2	19	AC	X	38	CTACACGACGCTCTTCCGATCTAGAGCCCAGCTGAATTCCATAAC	CAGACGTGTGCTCTTCCGATCTCAAGGAATGGCCAAGCTAGACAG	147533783	147533820	147533716	147533738	147533873	147533895	147533716	147533895	122_40	40
X_36067606_36067643	29636	2	19	AC	X	38	CTACACGACGCTCTTCCGATCTAGCATATGTTTTCGAGGGTTACAC	CAGACGTGTGCTCTTCCGATCTATGTGGAACACAGAAGTTTCACT	36067606	36067643	36067500	36067523	36067646	36067668	36067500	36067668	122_40	40
X_127009959_127009996	29637	2	19	AC	X	38	CTACACGACGCTCTTCCGATCTAGCATCGATGTTGTTGCAAATGG	CAGACGTGTGCTCTTCCGATCTATGCAAGCGTCCATTAACAAAGG	127009959	127009996	127009898	127009920	127010045	127010067	127009898	127010067	122_40	40
X_35171139_35171176	29638	2	19	AC	X	38	CTACACGACGCTCTTCCGATCTAGCATTCCAAAGCTGAGATTTAAC	CAGACGTGTGCTCTTCCGATCTTGAAACTCCTCCACCTACCAAAA	35171139	35171176	35171033	35171056	35171222	35171244	35171033	35171244	122_40	40
X_43551249_43551286	29639	2	19	AC	X	38	CTACACGACGCTCTTCCGATCTAGCTCCAGGAAGGAAATGTTGAA	CAGACGTGTGCTCTTCCGATCTCTTGTTAGCTCGCTGGCTCTTTA	43551249	43551286	43551143	43551165	43551310	43551332	43551143	43551332	122_40	40
X_69446424_69446461	29640	2	19	AC	X	38	CTACACGACGCTCTTCCGATCTAGCTGCGTATGTCAACAAAGATG	CAGACGTGTGCTCTTCCGATCTACATTTAGGTTTGTCTGCTTTTGAC	69446424	69446461	69446350	69446372	69446474	69446498	69446350	69446498	122_40	40
X_66782199_66782236	29641	2	19	AC	X	38	CTACACGACGCTCTTCCGATCTAGCTTCTTTCACCCTTCATCAGA	CAGACGTGTGCTCTTCCGATCTGCCAGATCTTCATTCCCTATGGTG	66782199	66782236	66782127	66782149	66782294	66782317	66782127	66782317	122_40	40
X_50165596_50165633	29642	2	19	AC	X	38	CTACACGACGCTCTTCCGATCTAGGAACCGTCTGGTTAATGATGC	CAGACGTGTGCTCTTCCGATCTAGCCCTCAAGCCAAAGAAATGAT	50165596	50165633	50165553	50165575	50165667	50165689	50165553	50165689	122_40	40
X_93000758_93000795	29643	2	19	AC	X	38	CTACACGACGCTCTTCCGATCTAGGGACATCAACTCCTGATGTTT	CAGACGTGTGCTCTTCCGATCTAACAGAGGAACCAAACTGCCTTT	93000758	93000795	93000652	93000674	93000879	93000901	93000652	93000901	122_40	40
X_138063481_138063518	29644	2	19	AC	X	38	CTACACGACGCTCTTCCGATCTAGGTACAATGGCAACAGGATGTG	CAGACGTGTGCTCTTCCGATCTATCAGGATAACCCTCCTCCCTTG	138063481	138063518	138063407	138063429	138063528	138063550	138063407	138063550	122_40	40
X_38408917_38408954	29645	2	19	AC	X	38	CTACACGACGCTCTTCCGATCTAGTGATGAGATATTGGCTCACGA	CAGACGTGTGCTCTTCCGATCTAGGGAGTGGGGATGGTCAATAAA	38408917	38408954	38408850	38408872	38409018	38409040	38408850	38409040	122_40	40
X_43690241_43690278	29646	2	19	AC	X	38	CTACACGACGCTCTTCCGATCTAGTGGGACAGGTACAAACATCCT	CAGACGTGTGCTCTTCCGATCTGAACCTCAAAGGCCCTTATCCTG	43690241	43690278	43690144	43690166	43690319	43690341	43690144	43690341	122_40	40
X_63626098_63626135	29647	2	19	AC	X	38	CTACACGACGCTCTTCCGATCTAGTTGGTGTTTGACCTGTAATTTGA	CAGACGTGTGCTCTTCCGATCTGATCCCAAACCGTTGAAGGAACT	63626098	63626135	63625997	63626021	63626159	63626181	63625997	63626181	122_40	40
X_105784601_105784638	29648	2	19	AC	X	38	CTACACGACGCTCTTCCGATCTAGTTTGCTATCCAAACACAAGGA	CAGACGTGTGCTCTTCCGATCTATTATTGTTGACCAACGGGGCTT	105784601	105784638	105784528	105784550	105784647	105784669	105784528	105784669	122_40	40
X_136554380_136554417	29649	2	19	AC	X	38	CTACACGACGCTCTTCCGATCTATAAGCAGCTCTTGTTCCTGCTC	CAGACGTGTGCTCTTCCGATCTAGTAGCTGCCCTTAGAAAGTTGC	136554380	136554417	136554330	136554352	136554467	136554489	136554330	136554489	122_40	40
X_7522851_7522888	29650	2	19	AC	X	38	CTACACGACGCTCTTCCGATCTATCACTGTTAAGCCCAGAAGTCA	CAGACGTGTGCTCTTCCGATCTTTCCCTCCAAATTTTCATTTCACT	7522851	7522888	7522762	7522784	7522914	7522937	7522762	7522937	122_40	40
X_34166831_34166868	29651	2	19	AG	X	38	CTACACGACGCTCTTCCGATCTATGCCATCTCATAGCAGGTCTCT	CAGACGTGTGCTCTTCCGATCTGAGTTGGGGTGTCTACATTGTCC	34166831	34166868	34166813	34166835	34166919	34166941	34166813	34166941	122_40	40
X_34166870_34166907	29651	2	19	AC	X	38	CTACACGACGCTCTTCCGATCTATGCCATCTCATAGCAGGTCTCT	CAGACGTGTGCTCTTCCGATCTGAGTTGGGGTGTCTACATTGTCC	34166870	34166907	34166813	34166835	34166919	34166941	34166813	34166941	122_40	40
X_141449523_141449560	29652	2	19	AC	X	38	CTACACGACGCTCTTCCGATCTATGGTTCTCCAGAGAAACTGCAA	CAGACGTGTGCTCTTCCGATCTGACTTCTGCTCCAAAGGTTCCAA	141449523	141449560	141449478	141449500	141449643	141449665	141449478	141449665	122_40	40
X_140359058_140359095	29653	2	19	AC	X	38	CTACACGACGCTCTTCCGATCTATTCACCCAGCCTTTTCTTCCAC	CAGACGTGTGCTCTTCCGATCTTGGGAAATGTTCCTCATGTATTAAGTG	140359058	140359095	140359016	140359038	140359138	140359164	140359016	140359164	122_40	40
X_29897475_29897512	71122	2	19	AC	X	38	CTACACGACGCTCTTCCGATCTAGTAGGGAGAGAATGCCACTTCA	CAGACGTGTGCTCTTCCGATCTACATGCAGATACACATGTACACAAA	29897475	29897512	29897370	29897392	29897532	29897556	29897370	29897556	124_40	40
X_111326027_111326062	70727	2	18	AG	X	36	CTACACGACGCTCTTCCGATCTCCTGAGCTCTTCCTTTTCCCTTC	CAGACGTGTGCTCTTCCGATCTCCACGGTTGTCTCAATCTCTCTC	111326027	111326062	111325887	111325909	111326081	111326103	111325887	111326103	137_43	43
Y_15548848_15548883	52651	2	18	AC	Y	36	CTACACGACGCTCTTCCGATCTCGAACTGGTCCAAAAGGGATCAA	CAGACGTGTGCTCTTCCGATCTTGGGTAGAGAAGGGCATATGGAG	15548848	15548883	15548774	15548796	15548921	15548943	15548774	15548943	138_43	43
Y_6918870_6918905	40649	2	18	AC	Y	36	CTACACGACGCTCTTCCGATCTTATTCGCGGAACGAAAAAGAAGC	CAGACGTGTGCTCTTCCGATCTTGTCTATTCTCCACAGGCTTTGC	6918870	6918905	6918816	6918838	6918931	6918953	6918816	6918953	139_43	43
X_49842277_49842312	70166	2	18	AC	X	36	CTACACGACGCTCTTCCGATCTTACCCTGTCCCATACTCTGATGC	CAGACGTGTGCTCTTCCGATCTCCCCCAAAAGCAAGGGAAATACA	49842277	49842312	49842149	49842171	49842310	49842332	49842149	49842332	141_43	43
Y_16514305_16514340	39895	2	18	AC	Y	36	CTACACGACGCTCTTCCGATCTTCAGGGAGTAAGACCAGGGAATC	CAGACGTGTGCTCTTCCGATCTTCAAAGATATGTGTGTCCGTGTGT	16514305	16514340	16514274	16514296	16514362	16514385	16514274	16514385	142_43	43
X_17380595_17380630	70251	2	18	AC	X	36	CTACACGACGCTCTTCCGATCTGTGAGGGACAGATGCATGTCTTT	CAGACGTGTGCTCTTCCGATCTCAAAGTGTGGAAGCACTTAGGGA	17380595	17380630	17380507	17380529	17380708	17380730	17380507	17380730	142_43	43
Y_21562050_21562085	69560	2	18	AC	Y	36	CTACACGACGCTCTTCCGATCTAAAACCTTGCAGACACACACAAC	CAGACGTGTGCTCTTCCGATCTATCGCTGTTCATCAAGGATGCTG	21562050	21562085	21562011	21562033	21562096	21562118	21562011	21562118	144_43	40
X_50559759_50559794	29774	2	18	AC	X	36	CTACACGACGCTCTTCCGATCTAAGCAATGGAGAACATTCGAGGG	CAGACGTGTGCTCTTCCGATCTTCTACCTGCCTAGTGGACTTTCC	50559759	50559794	50559725	50559747	50559877	50559899	50559725	50559899	146_42	42
X_32966231_32966266	29376	2	18	AC	X	36	CTACACGACGCTCTTCCGATCTAAACCTTGAAACCCCACTCAAAA	CAGACGTGTGCTCTTCCGATCTGAGAGTTTCTTTCCCAAGGCCAA	32966231	32966266	32966189	32966211	32966311	32966333	32966189	32966333	147_42	42
X_136986184_136986219	29770	2	18	AC	X	36	CTACACGACGCTCTTCCGATCTAACAGTTCCTTGACCTACCCTGA	CAGACGTGTGCTCTTCCGATCTCATACTGGAAGGATGTGGGATGC	136986184	136986219	136986077	136986099	136986306	136986328	136986077	136986328	147_42	42
X_136250183_136250218	29773	2	18	AC	X	36	CTACACGACGCTCTTCCGATCTAAGACCAGAAGGATCCTGGAACA	CAGACGTGTGCTCTTCCGATCTGGTTTACCCTGGGTGTCTTCTTG	136250183	136250218	136250118	136250140	136250305	136250327	136250118	136250327	148_42	42
X_100925547_100925582	29769	2	18	AC	X	36	CTACACGACGCTCTTCCGATCTAACAGGCAGTCCTTTGATTGTGT	CAGACGTGTGCTCTTCCGATCTTGGGACAAATCATGCACCTGTAG	100925547	100925582	100925439	100925461	100925645	100925667	100925439	100925667	149_42	42
X_107138059_107138094	29771	2	18	AC	X	36	CTACACGACGCTCTTCCGATCTAACTAGGTTACAGAGTGGGGTGA	CAGACGTGTGCTCTTCCGATCTATCTTCAGGCCTTTGCTCAACTG	107138059	107138094	107138036	107138058	107138121	107138143	107138036	107138143	149_42	42
X_63578724_63578759	29772	2	18	AC	X	36	CTACACGACGCTCTTCCGATCTAAGAAACACATACACATGCCCGT	CAGACGTGTGCTCTTCCGATCTTCATGGACTTTACCTTGGGCAAC	63578724	63578759	63578696	63578718	63578816	63578838	63578696	63578838	149_42	42
X_28780904_28780939	29656	2	18	AC	X	36	CTACACGACGCTCTTCCGATCTCAGGTCTCTAGTTGAAGGTTCCTG	CAGACGTGTGCTCTTCCGATCTTCCTCTGCTTTGGTTACGTGAAA	28780904	28780939	28780826	28780849	28780976	28780998	28780826	28780998	150_42	42
X_44139277_44139312	29378	2	18	AC	X	36	CTACACGACGCTCTTCCGATCTAAATCCTGATGCATTGGCCACAC	CAGACGTGTGCTCTTCCGATCTAGTAGTTCTCAACCTTGGCTTGC	44139277	44139312	44139203	44139225	44139383	44139405	44139203	44139405	152_42	42
X_99273821_99273856	29377	2	18	AC	X	36	CTACACGACGCTCTTCCGATCTAAACTCTGATCCCATAAACCACA	CAGACGTGTGCTCTTCCGATCTTGAGGGGCATGTATGAGTGGATA	99273821	99273856	99273777	99273799	99273943	99273965	99273777	99273965	153_42	42
X_102828924_102828959	29375	2	18	AC	X	36	CTACACGACGCTCTTCCGATCTAAACCATAGCACATGGCAACTGA	CAGACGTGTGCTCTTCCGATCTCCAAGTTGAGGTGGTGGGTTTTA	102828924	102828959	102828884	102828906	102829015	102829037	102828884	102829037	154_42	42
X_110651031_110651066	29768	2	18	AC	X	36	CTACACGACGCTCTTCCGATCTAACAGAGATTATCACCAGCCCCT	CAGACGTGTGCTCTTCCGATCTGCGTTATGCACAAAATTTCCCCA	110651031	110651066	110650991	110651013	110651105	110651127	110650991	110651127	155_42	42
X_34228588_34228623	29437	2	18	AT	X	36	CTACACGACGCTCTTCCGATCTAGATTCTGGCTTTTCCTTTCCAA	CAGACGTGTGCTCTTCCGATCTGTGAAAAATGTCAAAGTGCAAAAGGT	34228588	34228623	34228487	34228509	34228678	34228703	34228487	34228703	97_40	40
X_71942519_71942554	29439	2	18	AC	X	36	CTACACGACGCTCTTCCGATCTAACCATGCACCCATGATTACACC	CAGACGTGTGCTCTTCCGATCTGCATGGACCTTATTGGCTCTTGA	71942519	71942554	71942413	71942435	71942633	71942655	71942413	71942655	97_40	40
X_49772049_49772084	29452	2	18	AC	X	36	CTACACGACGCTCTTCCGATCTAGGAGAGACAGGAGCCTTTTTGA	CAGACGTGTGCTCTTCCGATCTCGCCCCTTCACATAAGGGATATG	49772049	49772084	49771919	49771941	49772112	49772134	49771919	49772134	97_40	40
X_8415157_8415192	29460	2	18	AG	X	36	CTACACGACGCTCTTCCGATCTACACAGTAAAATACTGCCCTCAGA	CAGACGTGTGCTCTTCCGATCTTGGATAGCAAAAATTCTCTCTCTCTGT	8415157	8415192	8415096	8415119	8415207	8415233	8415096	8415233	97_40	40
X_105185548_105185583	29461	2	18	AG	X	36	CTACACGACGCTCTTCCGATCTACCTACTTGGGAGCAATGCAAAA	CAGACGTGTGCTCTTCCGATCTTAAAGCCCTTTCTTGGCTGCAAT	105185548	105185583	105185486	105185508	105185607	105185629	105185486	105185629	97_40	40
X_38852416_38852451	29462	2	18	AG	X	36	CTACACGACGCTCTTCCGATCTATGGAAAGGGGCTAATTGTACCG	CAGACGTGTGCTCTTCCGATCTTCAAGCTTTTCTGCCTCATTTGC	38852416	38852451	38852329	38852351	38852475	38852497	38852329	38852497	97_40	40
X_22393594_22393629	29616	2	18	AC	X	36	CTACACGACGCTCTTCCGATCTAAGTAAATAGTGTGGGGATGCGA	CAGACGTGTGCTCTTCCGATCTCAGAAGAACCGCTTTGCTTGAAC	22393594	22393629	22393534	22393556	22393739	22393761	22393534	22393761	122_40	40
X_124435127_124435162	29622	2	18	AC	X	36	CTACACGACGCTCTTCCGATCTACAGGTAGTTTCTCCAAAGTGCT	CAGACGTGTGCTCTTCCGATCTAAAACAAAAGTGCATGCCACACA	124435127	124435162	124435053	124435075	124435223	124435245	124435053	124435245	122_40	40
X_47468286_47468321	32295	2	18	AC	X	36	CTACACGACGCTCTTCCGATCTTTATCATGGAAGGGGGATGAGGG	CAGACGTGTGCTCTTCCGATCTTGTGTCAGAGAGAGAGCAAGGAA	47468286	47468321	47468204	47468226	47468387	47468409	47468204	47468409	124_40	40
X_149821132_149821167	35116	2	18	AC	X	36	CTACACGACGCTCTTCCGATCTTGGAAAAGCATTGGAAAGAACCT	CAGACGTGTGCTCTTCCGATCTTGGAGAAAACATAGCCCTATTACTCA	149821132	149821167	149821025	149821047	149821221	149821246	149821025	149821246	124_40	40
X_45376318_45376353	41848	2	18	AC	X	36	CTACACGACGCTCTTCCGATCTTAAGCCACTATGACGTTTTCCCC	CAGACGTGTGCTCTTCCGATCTGTTCAAGCCACAACAAAAGTGCT	45376318	45376353	45376262	45376284	45376437	45376459	45376262	45376459	124_40	40
X_22823125_22823160	49454	2	18	AC	X	36	CTACACGACGCTCTTCCGATCTGACACCAGTCTTCATCACCTCAC	CAGACGTGTGCTCTTCCGATCTTGTGGATCTTGTTGAGTGTGTGT	22823125	22823160	22823077	22823099	22823199	22823221	22823077	22823221	124_40	40
X_95802006_95802041	69692	2	18	AC	X	36	CTACACGACGCTCTTCCGATCTTTTGCCAGTCTGATAACCAGAGA	CAGACGTGTGCTCTTCCGATCTTCCAGGACACTAAGCAAAACATCA	95802006	95802041	95801923	95801945	95802125	95802148	95801923	95802148	124_40	40
X_47636538_47636573	69747	2	18	AC	X	36	CTACACGACGCTCTTCCGATCTTTCTCCTGTGTGAATTTGCTGCT	CAGACGTGTGCTCTTCCGATCTGAGTAGAGTGACTGTGGGAAAGC	47636538	47636573	47636499	47636521	47636578	47636600	47636499	47636600	124_40	40
X_107416692_107416727	69752	2	18	AC	X	36	CTACACGACGCTCTTCCGATCTTTCCCACTTTGTTTTCATCCCCC	CAGACGTGTGCTCTTCCGATCTAGGCAAAGTCCCTGAACTTCAAA	107416692	107416727	107416611	107416633	107416770	107416792	107416611	107416792	124_40	40
X_87802054_87802089	69827	2	18	AC	X	36	CTACACGACGCTCTTCCGATCTTGTCATTTTGCATTGTGAAGAGCA	CAGACGTGTGCTCTTCCGATCTACATGTTGCCGAACAGACATGAA	87802054	87802089	87801957	87801980	87802169	87802191	87801957	87802191	124_40	40
X_30947417_30947452	69847	2	18	AC	X	36	CTACACGACGCTCTTCCGATCTTGGGTTAAAAGTCAGCCCCATTC	CAGACGTGTGCTCTTCCGATCTTAAAAACGACTTCCCCCACTCTG	30947417	30947452	30947316	30947338	30947458	30947480	30947316	30947480	124_40	40
X_19054735_19054770	69860	2	18	AC	X	36	CTACACGACGCTCTTCCGATCTTGGCATTTCTTTAAATCCAAATCATTC	CAGACGTGTGCTCTTCCGATCTGGTGCAGTTTTTGGATCCCATTT	19054735	19054770	19054641	19054667	19054772	19054794	19054641	19054794	124_40	40
X_46750506_46750541	69872	2	18	AC	X	36	CTACACGACGCTCTTCCGATCTTGGAACAGTGTACTCACTATGCT	CAGACGTGTGCTCTTCCGATCTAGCCCTTTCAGTGGTTCTTGATG	46750506	46750541	46750457	46750479	46750556	46750578	46750457	46750578	124_40	40
X_78592049_78592084	69980	2	18	AC	X	36	CTACACGACGCTCTTCCGATCTTCTTCCTTCTGGATTTTGGAAGT	CAGACGTGTGCTCTTCCGATCTAAAAAGGTGTGAATGAAGCCTGC	78592049	78592084	78591970	78591992	78592107	78592129	78591970	78592129	124_40	40
X_48836643_48836678	70018	2	18	AC	X	36	CTACACGACGCTCTTCCGATCTTCTAAGAGATGCACCAGAGCCAT	CAGACGTGTGCTCTTCCGATCTAGTTGAGCTACGGAGACAGACTT	48836643	48836678	48836549	48836571	48836757	48836779	48836549	48836779	124_40	40
X_105259135_105259170	70071	2	18	AC	X	36	CTACACGACGCTCTTCCGATCTTCATCTTGAAGCCTTTCTGGTGT	CAGACGTGTGCTCTTCCGATCTTGGTGTACAGGCTAGAAAGCAAG	105259135	105259170	105259094	105259116	105259227	105259249	105259094	105259249	124_40	40
X_103293827_103293862	70180	2	18	AC	X	36	CTACACGACGCTCTTCCGATCTTAATGTTTGCCCCGTTTGATGCT	CAGACGTGTGCTCTTCCGATCTTGATACCCATTGAAGGATGCACA	103293827	103293862	103293767	103293789	103293938	103293960	103293767	103293960	124_40	40
X_36167019_36167054	70220	2	18	AC	X	36	CTACACGACGCTCTTCCGATCTGTTCCTTCTCTTTGCCCACTTCA	CAGACGTGTGCTCTTCCGATCTCACCAACTGGACAAAGCCAGAAT	36167019	36167054	36166981	36167003	36167077	36167099	36166981	36167099	124_40	40
X_51716013_51716048	70267	2	18	AC	X	36	CTACACGACGCTCTTCCGATCTGTCCAAACTTACCAAATTGCTTGC	CAGACGTGTGCTCTTCCGATCTACCACACCTTCTTGATTACTGGC	51716013	51716048	51715974	51715997	51716065	51716087	51715974	51716087	124_40	40
X_81145783_81145818	70532	2	18	AC	X	36	CTACACGACGCTCTTCCGATCTGAGATAATTCTGCCAGACTGCCC	CAGACGTGTGCTCTTCCGATCTGCACACCACACTCTCAATACCAA	81145783	81145818	81145708	81145730	81145873	81145895	81145708	81145895	124_40	40
X_9090301_9090336	70658	2	18	AC	X	36	CTACACGACGCTCTTCCGATCTCTCCTCACTCTGGGTACTTTCCA	CAGACGTGTGCTCTTCCGATCTAGCACCATTGAGAGATCTGGGAT	9090301	9090336	9090224	9090246	9090344	9090366	9090224	9090366	124_40	40
X_27671843_27671878	70674	2	18	AC	X	36	CTACACGACGCTCTTCCGATCTCTAGCCTCAACTCAATCCAGCTC	CAGACGTGTGCTCTTCCGATCTTCACTAACTGGCAGAAAATGAGACA	27671843	27671878	27671745	27671767	27671905	27671929	27671745	27671929	124_40	40
X_87586863_87586898	70703	2	18	AC	X	36	CTACACGACGCTCTTCCGATCTCCTTGATGCAGCAGTAAGTCAGT	CAGACGTGTGCTCTTCCGATCTAATACATGCTCAGGCATACCCAC	87586863	87586898	87586769	87586791	87586912	87586934	87586769	87586934	124_40	40
X_7571499_7571534	70793	2	18	AC	X	36	CTACACGACGCTCTTCCGATCTCCCAACCCCCTTTCTCTCTTTTC	CAGACGTGTGCTCTTCCGATCTATCGTCCTTCATAACTGGGCAAC	7571499	7571534	7571441	7571463	7571540	7571562	7571441	7571562	124_40	40
X_22347329_22347364	70827	2	18	AC	X	36	CTACACGACGCTCTTCCGATCTCCACCAAACTTATTCAAAACTTCCCA	CAGACGTGTGCTCTTCCGATCTTGGCCTTTGTATCTTGACTGGTG	22347329	22347364	22347289	22347314	22347418	22347440	22347289	22347440	124_40	40
X_76648680_76648715	70872	2	18	AC	X	36	CTACACGACGCTCTTCCGATCTCAGGATGCGTTGTCACCATAAGT	CAGACGTGTGCTCTTCCGATCTTCTGGGGAGAAAAGAAGGGTAGG	76648680	76648715	76648593	76648615	76648748	76648770	76648593	76648770	124_40	40
X_27136547_27136582	70883	2	18	AC	X	36	CTACACGACGCTCTTCCGATCTCAGATGTGCTCTGCTCATGTAAAC	CAGACGTGTGCTCTTCCGATCTTGTCAACAAAGCACAGTTTGGAA	27136547	27136582	27136442	27136465	27136604	27136626	27136442	27136626	124_40	40
X_71927480_71927515	70889	2	18	AC	X	36	CTACACGACGCTCTTCCGATCTCAGAGGCCAGGTTCAGAAAAAGA	CAGACGTGTGCTCTTCCGATCTTTGTCATATTTGCGTACCCACCC	71927480	71927515	71927373	71927395	71927520	71927542	71927373	71927542	124_40	40
X_43897422_43897457	71027	2	18	AC	X	36	CTACACGACGCTCTTCCGATCTATGAAGAAGAATGGCAAGGGGAG	CAGACGTGTGCTCTTCCGATCTTGTACATGGATGGAAAGTGGTGG	43897422	43897457	43897347	43897369	43897467	43897489	43897347	43897489	124_40	40
X_82346213_82346248	71132	2	18	AC	X	36	CTACACGACGCTCTTCCGATCTAGGTTTCAAAAGCTTATGCATCTGTC	CAGACGTGTGCTCTTCCGATCTAGAGTAGCACCCAGGAATCATGT	82346213	82346248	82346114	82346139	82346326	82346348	82346114	82346348	124_40	40
X_15889743_15889778	71144	2	18	AC	X	36	CTACACGACGCTCTTCCGATCTAGGGCTGGACAGTCAGAAACTTA	CAGACGTGTGCTCTTCCGATCTAATTCTAGACATTGGTCTCGCCC	15889743	15889778	15889663	15889685	15889865	15889887	15889663	15889887	124_40	40
X_109752100_109752135	71173	2	18	AC	X	36	CTACACGACGCTCTTCCGATCTAGGATGGGTAGGATGAGTGGATT	CAGACGTGTGCTCTTCCGATCTCTCAGTATCTCCAGCTTGCCAAC	109752100	109752135	109752077	109752099	109752186	109752208	109752077	109752208	124_40	40
X_16212943_16212978	71219	2	18	AC	X	36	CTACACGACGCTCTTCCGATCTAGCATCCTGGCCAGAAAATATGG	CAGACGTGTGCTCTTCCGATCTAGACCTAAGACAACAGGAACAAAA	16212943	16212978	16212886	16212908	16213037	16213060	16212886	16213060	124_40	40
X_105107315_105107350	71256	2	18	AC	X	36	CTACACGACGCTCTTCCGATCTAGACTGGCCAAACTTCAGACTTT	CAGACGTGTGCTCTTCCGATCTACACATGGGAATGGGTAACTTCC	105107315	105107350	105107274	105107296	105107377	105107399	105107274	105107399	124_40	40
X_40353688_40353723	71351	2	18	AC	X	36	CTACACGACGCTCTTCCGATCTACCTCATCAAGCCCAGAATGGTA	CAGACGTGTGCTCTTCCGATCTCAAATGCTAACGAACCACCCCTA	40353688	40353723	40353608	40353630	40353738	40353760	40353608	40353760	124_40	40
X_106320804_106320839	71440	2	18	AC	X	36	CTACACGACGCTCTTCCGATCTACACACGTAAGTGCAGACTTGTA	CAGACGTGTGCTCTTCCGATCTTGACTTGGAGGCACTGTTTTTCT	106320804	106320839	106320750	106320772	106320884	106320906	106320750	106320906	124_40	40
X_108113857_108113892	71465	2	18	AC	X	36	CTACACGACGCTCTTCCGATCTACAAAATGGTGAGGGAAGCATGT	CAGACGTGTGCTCTTCCGATCTGCAAGATCTGACATCCAGAACCA	108113857	108113892	108113781	108113803	108113918	108113940	108113781	108113940	124_40	40
X_36681951_36681986	71528	2	18	AC	X	36	CTACACGACGCTCTTCCGATCTAAGCTGTGGGCCTCAAATTATGT	CAGACGTGTGCTCTTCCGATCTGCATGGCTTCAGAGCTTGAGTAT	36681951	36681986	36681897	36681919	36682014	36682036	36681897	36682036	124_40	40
X_136830692_136830727	69743	2	18	AC	X	36	CTACACGACGCTCTTCCGATCTTTCTGGGTGAGTTCACTTTTCGG	CAGACGTGTGCTCTTCCGATCTGACAAGTTCCATAGCTTGAGGCA	136830692	136830727	136830622	136830644	136830790	136830812	136830622	136830812	125_40	40
X_142489724_142489759	69783	2	18	AC	X	36	CTACACGACGCTCTTCCGATCTTGTTTCCTGTGAAATGGAATGCT	CAGACGTGTGCTCTTCCGATCTGAACTAGCTCCTGCATAGCACTG	142489724	142489759	142489696	142489718	142489776	142489798	142489696	142489798	125_40	40
X_126226581_126226616	69815	2	18	AC	X	36	CTACACGACGCTCTTCCGATCTTGTGAGGGATAGCTTACAGAAAA	CAGACGTGTGCTCTTCCGATCTAGCCATAGTTGAAGGTTTAGGTCA	126226581	126226616	126226518	126226540	126226642	126226665	126226518	126226665	125_40	40
X_53087607_53087642	69818	2	18	AC	X	36	CTACACGACGCTCTTCCGATCTTGTGAATCTCTGTTGTGAGAGCC	CAGACGTGTGCTCTTCCGATCTGAGAGACCCTCAGATGCACACTA	53087607	53087642	53087531	53087553	53087654	53087676	53087531	53087676	125_40	40
X_10231547_10231582	69823	2	18	AC	X	36	CTACACGACGCTCTTCCGATCTTGTCCTTTACCTTCTGGCATTCG	CAGACGTGTGCTCTTCCGATCTAGGAAGTCCGACAAAGTCCTGAT	10231547	10231582	10231477	10231499	10231640	10231662	10231477	10231662	125_40	40
X_116312697_116312732	69830	2	18	AC	X	36	CTACACGACGCTCTTCCGATCTTGTCAAGACAATTCCTTTGCTCCA	CAGACGTGTGCTCTTCCGATCTCTACTAGGCCCTACACACACTCA	116312697	116312732	116312667	116312690	116312739	116312761	116312667	116312761	125_40	40
X_5139926_5139961	69835	2	18	AC	X	36	CTACACGACGCTCTTCCGATCTTGTAGAGAGATAAATACAGATGCAGAG	CAGACGTGTGCTCTTCCGATCTGTTGGGTCAATCAGTCAGGGTTT	5139926	5139961	5139853	5139879	5139988	5140010	5139853	5140010	125_40	40
X_147602896_147602931	69838	2	18	AC	X	36	CTACACGACGCTCTTCCGATCTTGTACCACATTCAGGTTCCACAG	CAGACGTGTGCTCTTCCGATCTTTGCAAGATCCAGGCAAAAGTCT	147602896	147602931	147602851	147602873	147602939	147602961	147602851	147602961	125_40	40
X_127703797_127703832	69908	2	18	AC	X	36	CTACACGACGCTCTTCCGATCTTGCCCTAGAAATTTGTGTCTCCT	CAGACGTGTGCTCTTCCGATCTGGCTGAAAACTAGCCTTGGATGT	127703797	127703832	127703773	127703795	127703881	127703903	127703773	127703903	125_40	40
X_145229529_145229564	69909	2	18	AC	X	36	CTACACGACGCTCTTCCGATCTTGCCCATGAGTGTTTATTACTGT	CAGACGTGTGCTCTTCCGATCTAGACCAAAACCACATGCAAAACC	145229529	145229564	145229467	145229489	145229566	145229588	145229467	145229588	125_40	40
X_145572555_145572590	69922	2	18	AC	X	36	CTACACGACGCTCTTCCGATCTTGCAAGCCTTATAGTAACCCCAG	CAGACGTGTGCTCTTCCGATCTAGATGTTTTTCTCTGATGGTCTGCT	145572555	145572590	145572530	145572552	145572623	145572647	145572530	145572647	125_40	40
X_38625334_38625369	69949	2	18	AC	X	36	CTACACGACGCTCTTCCGATCTTGAGAACTCACTGTGCTCAAAGC	CAGACGTGTGCTCTTCCGATCTTCCTGCCTCTGCATTCTCATTTC	38625334	38625369	38625288	38625310	38625418	38625440	38625288	38625440	125_40	40
X_7426694_7426729	70008	2	18	AC	X	36	CTACACGACGCTCTTCCGATCTTCTCCTTGACTCTTGGGTTTGGT	CAGACGTGTGCTCTTCCGATCTAGGAGTATCTGCATTAGCATGACTT	7426694	7426729	7426586	7426608	7426769	7426793	7426586	7426793	125_40	40
X_11647105_11647140	70063	2	18	AC	X	36	CTACACGACGCTCTTCCGATCTTCCAACCACAGCTAATTTTGGTCA	CAGACGTGTGCTCTTCCGATCTCCCTCCTTTCCTAGCTGTCTCTT	11647105	11647140	11647018	11647041	11647224	11647246	11647018	11647246	125_40	40
X_141216195_141216230	70106	2	18	AC	X	36	CTACACGACGCTCTTCCGATCTTCAAGAGCGTTGAGCTCATGTTA	CAGACGTGTGCTCTTCCGATCTAGACATATGCAAACCTCCCAAAGT	141216195	141216230	141216152	141216174	141216274	141216297	141216152	141216297	125_40	40
X_11706803_11706838	70141	2	18	AC	X	36	CTACACGACGCTCTTCCGATCTTAGGGACAAGTTGCAAATGGCTT	CAGACGTGTGCTCTTCCGATCTGGGAACAGTGTTGAGCTGTATCA	11706803	11706838	11706758	11706780	11706843	11706865	11706758	11706865	125_40	40
X_4435040_4435075	70159	2	18	AC	X	36	CTACACGACGCTCTTCCGATCTTACTGTGGCTCCAATGTTTTGGT	CAGACGTGTGCTCTTCCGATCTTGCAGTGATTCATTGGCTGTCTT	4435040	4435075	4435006	4435028	4435117	4435139	4435006	4435139	125_40	40
X_142792567_142792602	70227	2	18	AC	X	36	CTACACGACGCTCTTCCGATCTGTGGTTGTCCCTTAAATGTAGGC	CAGACGTGTGCTCTTCCGATCTTACGTCACAACCAGAAAACTGGC	142792567	142792602	142792519	142792541	142792652	142792674	142792519	142792674	125_40	40
X_132113502_132113537	70312	2	18	AC	X	36	CTACACGACGCTCTTCCGATCTGGGGTAAGGAAGGTAGGAAGTGT	CAGACGTGTGCTCTTCCGATCTTACTCATTTGGCTCCGCATTTCA	132113502	132113537	132113440	132113462	132113593	132113615	132113440	132113615	125_40	40
X_28722914_28722949	70443	2	18	AC	X	36	CTACACGACGCTCTTCCGATCTGCCCAGACCTGAATAAGAAAGCA	CAGACGTGTGCTCTTCCGATCTCTGTCATGCTCCAGTCACAGTTT	28722914	28722949	28722821	28722843	28722964	28722986	28722821	28722986	125_40	40
X_113617527_113617562	70463	2	18	AC	X	36	CTACACGACGCTCTTCCGATCTGCATTTCTCAGCATTCATGCCTC	CAGACGTGTGCTCTTCCGATCTGCAAAATCTGGCTCCTAGTGTCA	113617527	113617562	113617504	113617526	113617611	113617633	113617504	113617633	125_40	40
X_52001926_52001961	70492	2	18	AC	X	36	CTACACGACGCTCTTCCGATCTGCAATTTTGGACTTGACAGCCTC	CAGACGTGTGCTCTTCCGATCTTGTCCTTAGTGTCTCCAATTGCT	52001926	52001961	52001877	52001899	52002040	52002062	52001877	52002062	125_40	40
X_111400293_111400328	70509	2	18	AC	X	36	CTACACGACGCTCTTCCGATCTGATGCGAGTGTTGAGTACATGGT	CAGACGTGTGCTCTTCCGATCTGCTGATATTCTGGGTATCTTTTCAGGT	111400293	111400328	111400255	111400277	111400352	111400378	111400255	111400378	125_40	40
X_118331924_118331959	70567	2	18	AC	X	36	CTACACGACGCTCTTCCGATCTGAACGGACTAATACAACCCACCC	CAGACGTGTGCTCTTCCGATCTATCTGTGTGGAGGCAGCAATAAG	118331924	118331959	118331893	118331915	118332008	118332030	118331893	118332030	125_40	40
X_62854789_62854824	70785	2	18	AC	X	36	CTACACGACGCTCTTCCGATCTCCCATAGGATGCCTGGGAATAGA	CAGACGTGTGCTCTTCCGATCTAAAAAGACACCTCCTGGCATAGC	62854789	62854824	62854684	62854706	62854833	62854855	62854684	62854855	125_40	40
X_111187496_111187531	70934	2	18	AC	X	36	CTACACGACGCTCTTCCGATCTCAAGGAGGTGTGGGAGTAGAAGA	CAGACGTGTGCTCTTCCGATCTAAACAGACCCAAGCAGAGTTTCC	111187496	111187531	111187473	111187495	111187609	111187631	111187473	111187631	125_40	40
X_111187532_111187567	70934	2	18	AG	X	36	CTACACGACGCTCTTCCGATCTCAAGGAGGTGTGGGAGTAGAAGA	CAGACGTGTGCTCTTCCGATCTAAACAGACCCAAGCAGAGTTTCC	111187532	111187567	111187473	111187495	111187609	111187631	111187473	111187631	125_40	40
X_110330363_110330398	70941	2	18	AC	X	36	CTACACGACGCTCTTCCGATCTCAACTTGCCCCCTTTCCTTTTTG	CAGACGTGTGCTCTTCCGATCTAAAGTGGTTCACCACCTCTCTCC	110330363	110330398	110330269	110330291	110330415	110330437	110330269	110330437	125_40	40
X_8091061_8091096	70990	2	18	AC	X	36	CTACACGACGCTCTTCCGATCTATGTGTGTGTTGGTAGGAGGAGA	CAGACGTGTGCTCTTCCGATCTACTAAAGTACATGCTTAAAGCCCT	8091061	8091096	8091037	8091059	8091102	8091125	8091037	8091125	125_40	40
X_16219293_16219328	71155	2	18	AC	X	36	CTACACGACGCTCTTCCGATCTAGGGAAACACAAAGCCAGATTGA	CAGACGTGTGCTCTTCCGATCTAGTCCCTGTTGACTTCCCAGTTT	16219293	16219328	16219249	16219271	16219414	16219436	16219249	16219436	125_40	40
X_32174749_32174784	71189	2	18	AC	X	36	CTACACGACGCTCTTCCGATCTAGCTGTACAGGTGTGTGTGTAT	CAGACGTGTGCTCTTCCGATCTAGGTTTAATGCAAGGCTTGGTGA	32174749	32174784	32174700	32174721	32174814	32174836	32174700	32174836	125_40	40
X_136620502_136620537	71212	2	18	AC	X	36	CTACACGACGCTCTTCCGATCTAGCCCTTAAGATCTCACCTCCAG	CAGACGTGTGCTCTTCCGATCTTGTGTGAAGCTAAGATGAAAGTGGA	136620502	136620537	136620450	136620472	136620601	136620625	136620450	136620625	125_40	40
X_124135702_124135737	71217	2	18	AC	X	36	CTACACGACGCTCTTCCGATCTAGCCACTGTGATTTGAGGATTCTT	CAGACGTGTGCTCTTCCGATCTGATGGACTGGAGGTAGAGAGAGC	124135702	124135737	124135604	124135627	124135739	124135761	124135604	124135761	125_40	40
X_53653172_53653207	71238	2	18	AC	X	36	CTACACGACGCTCTTCCGATCTAGATCAGGAATACTGAACCCCAA	CAGACGTGTGCTCTTCCGATCTTACTTACCACTCTCCCCCTCTTC	53653172	53653207	53653100	53653122	53653260	53653282	53653100	53653282	125_40	40
X_137928348_137928383	71245	2	18	AC	X	36	CTACACGACGCTCTTCCGATCTAGAGGAACCATGTGAGCTGTACT	CAGACGTGTGCTCTTCCGATCTTTCTGTCCCTTCCAAAAGCACAA	137928348	137928383	137928263	137928285	137928450	137928472	137928263	137928472	125_40	40
X_149553546_149553581	71290	2	18	AC	X	36	CTACACGACGCTCTTCCGATCTACTTCAGGTCATGCAGGTTCATC	CAGACGTGTGCTCTTCCGATCTGGTTGGTACCCCAAACCACTATG	149553546	149553581	149553475	149553497	149553601	149553623	149553475	149553623	125_40	40
X_5844831_5844866	71438	2	18	AC	X	36	CTACACGACGCTCTTCCGATCTACACATGCATAAGTCTCTCTCCC	CAGACGTGTGCTCTTCCGATCTTCTCTCTCTCTAGACAAATGATTAGG	5844831	5844866	5844775	5844797	5844884	5844909	5844775	5844909	125_40	40
X_140837431_140837466	71463	2	18	AC	X	36	CTACACGACGCTCTTCCGATCTACAAACAGGTGTGTGTTGATCTGA	CAGACGTGTGCTCTTCCGATCTAGGAAAAACTAGATTTGACATTGCAGA	140837431	140837466	140837381	140837404	140837481	140837507	140837381	140837507	125_40	40
X_148486251_148486286	71464	2	18	AC	X	36	CTACACGACGCTCTTCCGATCTACAAACAGCTGCCTCCTAGAAAC	CAGACGTGTGCTCTTCCGATCTTGCCTAAATGTTCACAAGCCCAT	148486251	148486286	148486200	148486222	148486340	148486362	148486200	148486362	125_40	40
X_114758195_114758230	71490	2	18	AC	X	36	CTACACGACGCTCTTCCGATCTAATCGCTTGAGCAACAGGGAATA	CAGACGTGTGCTCTTCCGATCTAGCTTTGAATGCATCAAGGTCTCT	114758195	114758230	114758123	114758145	114758261	114758284	114758123	114758284	125_40	40
X_32804204_32804239	71519	2	18	AC	X	36	CTACACGACGCTCTTCCGATCTAAGGGCTTCACCATGTACTCTTG	CAGACGTGTGCTCTTCCGATCTATCAGTTGGGCAAGTGAGTCT	32804204	32804239	32804161	32804183	32804284	32804304	32804161	32804304	125_40	40
X_134091417_134091452	52161	2	18	AC	X	36	CTACACGACGCTCTTCCGATCTCTACAGGACACTGTCACAACCAG	CAGACGTGTGCTCTTCCGATCTAACTGTTCTGTCTCATGACTGCG	134091417	134091452	134091361	134091383	134091501	134091523	134091361	134091523	126_40	40
X_133711781_133711816	56389	2	18	AC	X	36	CTACACGACGCTCTTCCGATCTCAGAGAGAGAGACTCCACCAAAGA	CAGACGTGTGCTCTTCCGATCTTGTATGTGTGTGTGTTCCCATGC	133711781	133711816	133711699	133711722	133711859	133711881	133711699	133711881	126_40	40
X_101979647_101979682	69706	2	18	AC	X	36	CTACACGACGCTCTTCCGATCTTTTAATCTCAGCCGAAGAGCAGG	CAGACGTGTGCTCTTCCGATCTTCTACCCGCTACAAGTCAGAACA	101979647	101979682	101979617	101979639	101979708	101979730	101979617	101979730	126_40	40
X_152836462_152836497	69728	2	18	AC	X	36	CTACACGACGCTCTTCCGATCTTTGCATAAGCTGTCATTTTGGGC	CAGACGTGTGCTCTTCCGATCTTATTTGTGACAAGGGTAGGTGGC	152836462	152836497	152836371	152836393	152836555	152836577	152836371	152836577	126_40	40
X_124380988_124381023	69866	2	18	AC	X	36	CTACACGACGCTCTTCCGATCTTGGAGTCAAAAACTGTGTCCATCA	CAGACGTGTGCTCTTCCGATCTTCAATGGCTGAATCTCTTCCGTG	124380988	124381023	124380936	124380959	124381028	124381050	124380936	124381050	126_40	40
X_145006701_145006736	69893	2	18	AC	X	36	CTACACGACGCTCTTCCGATCTTGCTATGCTGTGATGCTGTCAAT	CAGACGTGTGCTCTTCCGATCTTGGCAAATGACAGGACTTCTTATGT	145006701	145006736	145006593	145006615	145006762	145006786	145006593	145006786	126_40	40
X_110615162_110615197	69912	2	18	AC	X	36	CTACACGACGCTCTTCCGATCTTGCATTACACACAGAGTAAGAGC	CAGACGTGTGCTCTTCCGATCTCTCCATGGCTTCATTTGGACTCT	110615162	110615197	110615068	110615090	110615230	110615252	110615068	110615252	126_40	40
X_138438860_138438895	69966	2	18	AC	X	36	CTACACGACGCTCTTCCGATCTTGAAGAACATGTAACAGAAATGATCTA	CAGACGTGTGCTCTTCCGATCTGCATCTTCTGGTTGATGCCTAAG	138438860	138438895	138438754	138438780	138438973	138438995	138438754	138438995	126_40	40
X_73464082_73464117	69971	2	18	AC	X	36	CTACACGACGCTCTTCCGATCTTGAAAGAGAAACGAACACAGCCA	CAGACGTGTGCTCTTCCGATCTTTACGGATACATTTTTGTGGGCA	73464082	73464117	73463994	73464016	73464172	73464194	73463994	73464194	126_40	40
X_131890849_131890884	69983	2	18	AC	X	36	CTACACGACGCTCTTCCGATCTTCTTCAAGTGGCTCTCTCTCACA	CAGACGTGTGCTCTTCCGATCTGTTCTGCTCTGGGGTACTCTGTA	131890849	131890884	131890796	131890818	131890923	131890945	131890796	131890945	126_40	40
X_67979186_67979221	70007	2	18	AC	X	36	CTACACGACGCTCTTCCGATCTTCTCGTTTTTCCTGGGTCATTGG	CAGACGTGTGCTCTTCCGATCTGGTAGTGACACACTCCCTTGAGA	67979186	67979221	67979078	67979100	67979250	67979272	67979078	67979272	126_40	40
X_142184321_142184356	70010	2	18	AC	X	36	CTACACGACGCTCTTCCGATCTTCTCACCTAAGTTCCACATCCGT	CAGACGTGTGCTCTTCCGATCTACAATACAGGGGACAAGAGCCTA	142184321	142184356	142184213	142184235	142184387	142184409	142184213	142184409	126_40	40
X_117770792_117770827	70017	2	18	AC	X	36	CTACACGACGCTCTTCCGATCTTCTACCCACTGCAGAAATGTGTC	CAGACGTGTGCTCTTCCGATCTACTTCCCATGTCCAGACTAGGTT	117770792	117770827	117770754	117770776	117770863	117770885	117770754	117770885	126_40	40
X_117293497_117293532	70196	2	18	AC	X	36	CTACACGACGCTCTTCCGATCTTAAAATGCCCCAGTTGTGTAGGC	CAGACGTGTGCTCTTCCGATCTTTCGTGCCCTCTTATTGTGGAAG	117293497	117293532	117293424	117293446	117293612	117293634	117293424	117293634	126_40	40
X_136203451_136203486	70212	2	18	AC	X	36	CTACACGACGCTCTTCCGATCTGTTGATCTGACAACAGTTTATTCAACA	CAGACGTGTGCTCTTCCGATCTATCCCCTCCTGTACCTTGTTTCA	136203451	136203486	136203399	136203425	136203532	136203554	136203399	136203554	126_40	40
X_77042392_77042427	70244	2	18	AC	X	36	CTACACGACGCTCTTCCGATCTGTGCAGACGACATAAGACCAACT	CAGACGTGTGCTCTTCCGATCTGGCATTTACAGATCATCCAGCCA	77042392	77042427	77042319	77042341	77042511	77042533	77042319	77042533	126_40	40
X_141441502_141441537	70249	2	18	AC	X	36	CTACACGACGCTCTTCCGATCTGTGAGTAGGGATGTGTGCATGTT	CAGACGTGTGCTCTTCCGATCTACTCACCTAGGAATATGGCTTCTGA	141441502	141441537	141441478	141441500	141441567	141441591	141441478	141441591	126_40	40
X_95244485_95244520	70253	2	18	AC	X	36	CTACACGACGCTCTTCCGATCTGTCTTTAAGAGATTCGCAATGACA	CAGACGTGTGCTCTTCCGATCTGATAGCACTGGGGTTTCTCTCTG	95244485	95244520	95244379	95244402	95244538	95244560	95244379	95244560	126_40	40
X_106873969_106874004	70288	2	18	AC	X	36	CTACACGACGCTCTTCCGATCTGGTGACTCTTGGTTGATGCTCTC	CAGACGTGTGCTCTTCCGATCTTTCAGCACTTTTAACACCCACCC	106873969	106874004	106873884	106873906	106874010	106874032	106873884	106874032	126_40	40
X_97907768_97907803	70337	2	18	AC	X	36	CTACACGACGCTCTTCCGATCTGGCTTTAAAGAGGGAAACTGCAC	CAGACGTGTGCTCTTCCGATCTAGGGAATTTTAAGTGGCTGTCAGA	97907768	97907803	97907728	97907750	97907871	97907894	97907728	97907894	126_40	40
X_145706938_145706973	70367	2	18	AC	X	36	CTACACGACGCTCTTCCGATCTGGAGAAAGCACCCTTATAACCCA	CAGACGTGTGCTCTTCCGATCTGCCAAATAAAATAAAAAGCAGTGACCC	145706938	145706973	145706831	145706853	145707022	145707048	145706831	145707048	126_40	40
X_111094739_111094774	70412	2	18	AC	X	36	CTACACGACGCTCTTCCGATCTGCTGAATGTTGTGTGGGAAAAGT	CAGACGTGTGCTCTTCCGATCTATCACCCAACCTGTGCTTCTCTA	111094739	111094774	111094707	111094729	111094791	111094813	111094707	111094813	126_40	40
X_105845182_105845217	70612	2	18	AC	X	36	CTACACGACGCTCTTCCGATCTCTGGTACTTTCCAGCACAAGGAA	CAGACGTGTGCTCTTCCGATCTTAAACCGCCAGTGGGAATGTAAA	105845182	105845217	105845096	105845118	105845270	105845292	105845096	105845292	126_40	40
X_135393554_135393589	70619	2	18	AC	X	36	CTACACGACGCTCTTCCGATCTCTGGCTATTGGCTGTGTAATGGA	CAGACGTGTGCTCTTCCGATCTATGCTCCAGAACACGTTACACTC	135393554	135393589	135393464	135393486	135393633	135393655	135393464	135393655	126_40	40
X_66430407_66430442	71007	2	18	AC	X	36	CTACACGACGCTCTTCCGATCTATGGATGCTGCCATTGTTAGGAA	CAGACGTGTGCTCTTCCGATCTAGGTTCGTTGAGGCCGTTTTAAT	66430407	66430442	66430312	66430334	66430503	66430525	66430312	66430525	126_40	40
X_144529678_144529713	71047	2	18	AC	X	36	CTACACGACGCTCTTCCGATCTATCCTCAAAACACTGCACGATGA	CAGACGTGTGCTCTTCCGATCTCCCAGTGCTAACAGCTATCCTGA	144529678	144529713	144529621	144529643	144529799	144529821	144529621	144529821	126_40	40
X_141284838_141284873	71064	2	18	AC	X	36	CTACACGACGCTCTTCCGATCTATATCTACACCATCCTCCTGCCC	CAGACGTGTGCTCTTCCGATCTTAATGAGGCATCAGTGGAGGTCA	141284838	141284873	141284784	141284806	141284927	141284949	141284784	141284949	126_40	40
X_114301644_114301679	71078	2	18	AC	X	36	CTACACGACGCTCTTCCGATCTAGTTTGCAAATCTGCCCCTTCTT	CAGACGTGTGCTCTTCCGATCTCTCACCAGGAAAGTATGTGGTGG	114301644	114301679	114301619	114301641	114301725	114301747	114301619	114301747	126_40	40
X_79750120_79750155	71152	2	18	AC	X	36	CTACACGACGCTCTTCCGATCTAGGGAAATTGGTAACTTCTTGGCT	CAGACGTGTGCTCTTCCGATCTTGGAGTGAGACTATGTCTCGTGAA	79750120	79750155	79750080	79750103	79750211	79750234	79750080	79750234	126_40	40
X_151172463_151172498	71408	2	18	AC	X	36	CTACACGACGCTCTTCCGATCTACAGTCCCCGGCATTTTGTTAAA	CAGACGTGTGCTCTTCCGATCTGCGTACAGGCTAGAAAGGAAAATG	151172463	151172498	151172412	151172434	151172584	151172607	151172412	151172607	126_40	40
X_100633517_100633552	71416	2	18	AC	X	36	CTACACGACGCTCTTCCGATCTACAGAGTCGGTTTGACCACAAAA	CAGACGTGTGCTCTTCCGATCTGGGGACATTGTAACACTGGAACT	100633517	100633552	100633412	100633434	100633626	100633648	100633412	100633648	126_40	40
X_124139257_124139292	71504	2	18	AC	X	36	CTACACGACGCTCTTCCGATCTAAGTGTGCAGTATTTCCCCAGTG	CAGACGTGTGCTCTTCCGATCTTGAACATGTAGAGCAAACAAACCC	124139257	124139292	124139205	124139227	124139360	124139383	124139205	124139383	126_40	40
X_118167608_118167643	28824	3	12	AGC	X	36	CTACACGACGCTCTTCCGATCTGCCATGACAAGATGGACTGAGAG	CAGACGTGTGCTCTTCCGATCTACTTGACCTATTGGACTGTTGTGT	118167608	118167643	118167507	118167529	118167691	118167714	118167507	118167714	145_42	42
X_119272499_119272534	28770	3	12	AAT	X	36	CTACACGACGCTCTTCCGATCTCAGAGTGGGACTGTGTCTGAAAT	CAGACGTGTGCTCTTCCGATCTCTGTGCTTGACACACATGACGTA	119272499	119272534	119272479	119272501	119272622	119272644	119272479	119272644	146_42	42
X_122129210_122129245	28772	3	12	AAT	X	36	CTACACGACGCTCTTCCGATCTGTTCTCTTCCCTTGGCTTCTAGC	CAGACGTGTGCTCTTCCGATCTCCACTCTGGGTAAGGGAAGGTAA	122129210	122129245	122129161	122129183	122129321	122129343	122129161	122129343	148_42	42
X_21392713_21392748	28825	3	12	AGC	X	36	CTACACGACGCTCTTCCGATCTTCAAGCTATGAACTGAAGCTCCC	CAGACGTGTGCTCTTCCGATCTGTCTGCTCAGTTCCCGCTAAG	21392713	21392748	21392659	21392681	21392766	21392786	21392659	21392786	148_42	42
X_130047736_130047771	28839	3	12	ACT	X	36	CTACACGACGCTCTTCCGATCTTGAAAACAGACAGGGGTTGGATG	CAGACGTGTGCTCTTCCGATCTTGTTATGACGATTACACGAGCCA	130047736	130047771	130047681	130047703	130047855	130047877	130047681	130047877	148_42	42
X_18676901_18676936	28794	3	12	AGT	X	36	CTACACGACGCTCTTCCGATCTCCGGCCCAAGGTTTCTCTTTTAT	CAGACGTGTGCTCTTCCGATCTGTGAGGGAACTGGGAATCAACTC	18676901	18676936	18676871	18676893	18676967	18676989	18676871	18676989	149_42	42
X_84956161_84956196	28795	3	12	AGT	X	36	CTACACGACGCTCTTCCGATCTTGACTCCGAGCTTTTATTCTGCC	CAGACGTGTGCTCTTCCGATCTCATCTCTCAGGGAGAAGGAGGAG	84956161	84956196	84956128	84956150	84956256	84956278	84956128	84956278	149_42	42
X_83317925_83317960	28793	3	12	ACT	X	36	CTACACGACGCTCTTCCGATCTACCTAACACGCACAAGTAGTTCA	CAGACGTGTGCTCTTCCGATCTTACCGTTGCTACAACAACAGCAG	83317925	83317960	83317841	83317863	83317975	83317997	83317841	83317997	150_42	42
X_71267926_71267961	28774	3	12	AAT	X	36	CTACACGACGCTCTTCCGATCTTGGTTCCACAGATAGCTAACCCA	CAGACGTGTGCTCTTCCGATCTGGGGTTATTGTGAGGACTGAGTG	71267926	71267961	71267824	71267846	71268025	71268047	71267824	71268047	151_42	42
X_103185306_103185341	28775	3	12	AAT	X	36	CTACACGACGCTCTTCCGATCTTGTCAGTAAGACACATGCCTTGG	CAGACGTGTGCTCTTCCGATCTTGCCATCAGTAACACAAACCCAT	103185306	103185341	103185219	103185241	103185366	103185388	103185219	103185388	151_42	42
X_150934115_150934150	28826	3	12	AGC	X	36	CTACACGACGCTCTTCCGATCTTCTAGACTAATGGGCCCTACTGC	CAGACGTGTGCTCTTCCGATCTGACCCCGTCTCTGCATTTTACAT	150934115	150934150	150933972	150933994	150934193	150934215	150933972	150934215	151_42	42
X_150658452_150658487	28771	3	12	AAT	X	36	CTACACGACGCTCTTCCGATCTGGACCTCAGGAGTTCGCAATTAG	CAGACGTGTGCTCTTCCGATCTGCAGTGGTGTAATCACAGACCTT	150658452	150658487	150658396	150658418	150658567	150658589	150658396	150658589	152_42	42
X_102504909_102504944	28837	3	12	AGT	X	36	CTACACGACGCTCTTCCGATCTGTCCCCAACCAGAATCCATTGAA	CAGACGTGTGCTCTTCCGATCTTTCTGAGAGACCTGGCCATTCAT	102504909	102504944	102504865	102504887	102505019	102505041	102504865	102505041	152_42	42
X_142093687_142093722	28773	3	12	AAT	X	36	CTACACGACGCTCTTCCGATCTGTTCTGTGACCTTGGGTAAAATCC	CAGACGTGTGCTCTTCCGATCTACATGCTAAGCTTTGTGATCATT	142093687	142093722	142093634	142093657	142093754	142093776	142093634	142093776	153_42	42
X_48490061_48490096	28817	3	12	AGC	X	36	CTACACGACGCTCTTCCGATCTAAATATACAGCATCTCCTCCCGC	CAGACGTGTGCTCTTCCGATCTGCCTAGGTCGAGTAGGAATGGAA	48490061	48490096	48489953	48489975	48490177	48490199	48489953	48490199	153_42	42
X_110513618_110513653	28818	3	12	AGC	X	36	CTACACGACGCTCTTCCGATCTGGGTAAGTTTGCGAATTCCCTCT	CAGACGTGTGCTCTTCCGATCTAAGCCAGAATCTTTGTTCAGCCA	110513618	110513653	110513568	110513590	110513711	110513733	110513568	110513733	154_42	42
X_6817715_6817750	28836	3	12	AGT	X	36	CTACACGACGCTCTTCCGATCTAACACCCTAAATGATTTTAGCTCG	CAGACGTGTGCTCTTCCGATCTAGTCAGCGTTAGTATGGAGGGAT	6817715	6817750	6817671	6817694	6817818	6817840	6817671	6817840	154_42	42
X_80487896_80487931	28838	3	12	AGT	X	36	CTACACGACGCTCTTCCGATCTTCTTGGGATACAGTAACGGTTCA	CAGACGTGTGCTCTTCCGATCTACAATTCTGGGAGAGCATCAACT	80487896	80487931	80487846	80487868	80488015	80488037	80487846	80488037	156_42	11
X_81316201_81316236	28727	3	12	AGC	X	36	CTACACGACGCTCTTCCGATCTATTTACTATGCCATGCTGCTGCT	CAGACGTGTGCTCTTCCGATCTGGCATCTGTTCTTGTTTGCACAT	81316201	81316236	81316094	81316116	81316243	81316265	81316094	81316265	113_40	40
X_26882389_26882424	28730	3	12	AAG	X	36	CTACACGACGCTCTTCCGATCTAAAAATCTTGGCTAGGGGTGGGA	CAGACGTGTGCTCTTCCGATCTGGACAGCTCACCTGATTGTTCTA	26882389	26882424	26882350	26882372	26882511	26882533	26882350	26882533	113_40	40
X_83505470_83505505	28739	3	12	AAC	X	36	CTACACGACGCTCTTCCGATCTAACTGACGTTTTTGTCAGGTGGA	CAGACGTGTGCTCTTCCGATCTGTTGGTATGTCCATTCCCCTTGG	83505470	83505505	83505404	83505426	83505513	83505535	83505404	83505535	113_40	40
X_62264962_62264997	28740	3	12	AAC	X	36	CTACACGACGCTCTTCCGATCTGCATGTCCTGTCCTACGATCAAT	CAGACGTGTGCTCTTCCGATCTAGGGTGTTGCTTCCTCTACCATT	62264962	62264997	62264922	62264944	62265040	62265062	62264922	62265062	113_40	40
X_97105679_97105714	28741	3	12	AAC	X	36	CTACACGACGCTCTTCCGATCTTCCTTGTTTCTTCCTTGAGAAGT	CAGACGTGTGCTCTTCCGATCTACACATGAGGGCTAAAGATGAACA	97105679	97105714	97105635	97105657	97105789	97105812	97105635	97105812	113_40	40
1_9311496_9311531	29800	3	12	AAC	1	36	CTACACGACGCTCTTCCGATCTCCCTAGTTTCCCCTCTGTGTAGA	CAGACGTGTGCTCTTCCGATCTCTCAGGAAGTCTCCCTCCTTCTT	9311496	9311531	9311465	9311487	9311536	9311558	9311465	9311558	118_40	40
2_75456276_75456311	29858	3	12	AAC	2	36	CTACACGACGCTCTTCCGATCTGCCAGAAAATACTAGGCGATGCT	CAGACGTGTGCTCTTCCGATCTAAAAGAGTCAGTCATCCAAGCCG	75456276	75456311	75456220	75456242	75456349	75456371	75456220	75456371	119_40	40
8_35942553_35942588	29918	3	12	AAC	8	36	CTACACGACGCTCTTCCGATCTTTTGTGGGTGGCAAAATCACATT	CAGACGTGTGCTCTTCCGATCTTGATTGGGCCAGATTTTGTGTGA	35942553	35942588	35942490	35942512	35942598	35942620	35942490	35942620	119_40	40
12_98061997_98062032	29940	3	12	AAC	12	36	CTACACGACGCTCTTCCGATCTACCTCCAGAAACTTAGATGGGGA	CAGACGTGTGCTCTTCCGATCTGGATCTTCTCTGAGCATGCCTAC	98061997	98062032	98061895	98061917	98062051	98062073	98061895	98062073	119_40	40
2_180544329_180544364	29956	3	12	AAC	2	36	CTACACGACGCTCTTCCGATCTACAGATGTACCACTGGATCTTGGA	CAGACGTGTGCTCTTCCGATCTGAATCTCCACCAACCATTCTGCT	180544329	180544364	180544224	180544247	180544385	180544407	180544224	180544407	119_40	40
4_127746001_127746036	29966	3	12	AAC	4	36	CTACACGACGCTCTTCCGATCTTCTACTGAGATTGAGTATGACTTTGT	CAGACGTGTGCTCTTCCGATCTACTGGCAAAGACTACTGTTAAGAA	127746001	127746036	127745909	127745934	127746058	127746081	127745909	127746081	119_40	40
4_164997289_164997324	29967	3	12	AAC	4	36	CTACACGACGCTCTTCCGATCTCAGGTGCTTGGTAGGTGCTTAAA	CAGACGTGTGCTCTTCCGATCTCCAATTTGTTTGTTTTCTCTTATGGGC	164997289	164997324	164997186	164997208	164997330	164997356	164997186	164997356	119_40	40
6_94280241_94280276	29973	3	12	AAC	6	36	CTACACGACGCTCTTCCGATCTGACACTGAGCTAGGGTTCTTGTG	CAGACGTGTGCTCTTCCGATCTTTGCATAGCACATGTCCTCTCTG	94280241	94280276	94280150	94280172	94280286	94280308	94280150	94280308	119_40	40
6_97173097_97173132	29974	3	12	AAC	6	36	CTACACGACGCTCTTCCGATCTACTGTTTTGGCTGAGTTTTCCCT	CAGACGTGTGCTCTTCCGATCTAACCTTTGAGTGCCATAGCAAGG	97173097	97173132	97173065	97173087	97173208	97173230	97173065	97173230	119_40	40
7_37468623_37468658	29975	3	12	AAC	7	36	CTACACGACGCTCTTCCGATCTCAGAACTCCATGTGTGGGAGAAT	CAGACGTGTGCTCTTCCGATCTGGCTTTTCCTCTCCATACCTCCT	37468623	37468658	37468524	37468546	37468681	37468703	37468524	37468703	119_40	40
8_141062310_141062345	29978	3	12	AAC	8	36	CTACACGACGCTCTTCCGATCTGCCTTCTGCATTCCAGGGTTTAT	CAGACGTGTGCTCTTCCGATCTAGAGAAGGTTTCCTTGCATTTACA	141062310	141062345	141062217	141062239	141062377	141062400	141062217	141062400	119_40	40
8_66679237_66679272	29981	3	12	AAC	8	36	CTACACGACGCTCTTCCGATCTAGGAAGTTTCTCAATGGGTCTTGG	CAGACGTGTGCTCTTCCGATCTTCAGTTGGATGTAGTGGTCCAGG	66679237	66679272	66679151	66679174	66679274	66679296	66679151	66679296	119_40	40
9_125046246_125046281	29983	3	12	AAC	9	36	CTACACGACGCTCTTCCGATCTGCTTGCCTTCTTGCCATTTTTGA	CAGACGTGTGCTCTTCCGATCTACACAGCCAGATTTGGAACCATT	125046246	125046281	125046146	125046168	125046343	125046365	125046146	125046365	119_40	40
Y_22107635_22107668	56111	2	17	AC	Y	34	CTACACGACGCTCTTCCGATCTCAGCTGTTCTTGATTTGAAGTCTGT	CAGACGTGTGCTCTTCCGATCTAGAAGCTCACCTTACCACAGAGA	22107635	22107668	22107548	22107572	22107683	22107705	22107548	22107705	136_43	43
X_68336050_68336083	69723	2	17	AC	X	34	CTACACGACGCTCTTCCGATCTTTGCTCAGAAAGAAAGAGGCACA	CAGACGTGTGCTCTTCCGATCTCCTAGGACATGCCTTCCAAAGAC	68336050	68336083	68336011	68336033	68336119	68336141	68336011	68336141	136_43	43
X_102591753_102591786	71002	2	17	AC	X	34	CTACACGACGCTCTTCCGATCTATGGGCAGAGCAAGTGAAGAAAA	CAGACGTGTGCTCTTCCGATCTCACAATAGGGCCAGGTAACAGAC	102591753	102591786	102591680	102591702	102591875	102591897	102591680	102591897	136_43	43
Y_21547860_21547893	37069	2	17	AC	Y	34	CTACACGACGCTCTTCCGATCTTGACAAGGTCTTTGTGGTGACTT	CAGACGTGTGCTCTTCCGATCTCAAACAGCAGCCCTACAGAAGAG	21547860	21547893	21547811	21547833	21547913	21547935	21547811	21547935	137_43	43
X_78623641_78623674	69761	2	17	AC	X	34	CTACACGACGCTCTTCCGATCTTTCACTCTTCCAGGTCAGGGAAA	CAGACGTGTGCTCTTCCGATCTACCTCCACCTTCCTGAACACATA	78623641	78623674	78623542	78623564	78623684	78623706	78623542	78623706	137_43	43
X_138305432_138305465	70740	2	17	AC	X	34	CTACACGACGCTCTTCCGATCTCCTCCAATCTGGCAGAAACTTGA	CAGACGTGTGCTCTTCCGATCTCCTGGCTCATGGATGATGACATT	138305432	138305465	138305338	138305360	138305526	138305548	138305338	138305548	137_43	43
X_71687028_71687061	71075	2	17	AC	X	34	CTACACGACGCTCTTCCGATCTATAAAGGCGTAGCATGAGGGAAC	CAGACGTGTGCTCTTCCGATCTGGACATTGGTACAAGCCATAGAGC	71687028	71687061	71686923	71686945	71687092	71687115	71686923	71687115	137_43	43
X_66915581_66915614	54187	2	17	AC	X	34	CTACACGACGCTCTTCCGATCTCCCACCTTCTCCAGTCTGTCTAA	CAGACGTGTGCTCTTCCGATCTGCTGAGTCAGGGGAAAGAGAAAG	66915581	66915614	66915558	66915580	66915691	66915713	66915558	66915713	138_43	43
X_134526207_134526240	67976	2	17	AC	X	34	CTACACGACGCTCTTCCGATCTAAGCACCAAGTAGTCCTGGAAAC	CAGACGTGTGCTCTTCCGATCTTGTCCACGGACCAACATAGAGAT	134526207	134526240	134526162	134526184	134526287	134526309	134526162	134526309	138_43	43
X_119445665_119445698	69703	2	17	AC	X	34	CTACACGACGCTCTTCCGATCTTTTATAACTGGGGAGGGGGTCAG	CAGACGTGTGCTCTTCCGATCTTCTGGATCATCTCCAGCTCCATT	119445665	119445698	119445619	119445641	119445736	119445758	119445619	119445758	138_43	43
X_123508993_123509026	70933	2	17	AG	X	34	CTACACGACGCTCTTCCGATCTCAAGGTTGTCTTCTGCTCCATGA	CAGACGTGTGCTCTTCCGATCTCTTCAAAATGCCCTGCTGCTTTT	123508993	123509026	123508961	123508983	123509101	123509123	123508961	123509123	138_43	43
X_71162823_71162856	69497	2	17	AC	X	34	CTACACGACGCTCTTCCGATCTAAAAGCCCCATCTCCCTTTCTTG	CAGACGTGTGCTCTTCCGATCTGTGTGAAAATGGAAGAGGGAGGG	71162823	71162856	71162745	71162767	71162894	71162916	71162745	71162916	139_43	43
X_139333315_139333348	69695	2	17	AC	X	34	CTACACGACGCTCTTCCGATCTTTTCTTGTCTTGTCTCTCCTGCC	CAGACGTGTGCTCTTCCGATCTCCATTTGGGAGAGTGTCTCATGG	139333315	139333348	139333265	139333287	139333432	139333454	139333265	139333454	139_43	43
X_71372208_71372241	69717	2	17	AC	X	34	CTACACGACGCTCTTCCGATCTTTGGTTTCTCAACCTGGACTGTG	CAGACGTGTGCTCTTCCGATCTCAAGAAAGGGCAAATGCTTCAGG	71372208	71372241	71372135	71372157	71372317	71372339	71372135	71372339	139_43	43
X_42849333_42849366	70715	2	17	AG	X	34	CTACACGACGCTCTTCCGATCTCCTGTCCTGTTATATGCGTGCTT	CAGACGTGTGCTCTTCCGATCTTTCCTCCTCACACTAGACAAGGG	42849333	42849366	42849253	42849275	42849450	42849472	42849253	42849472	140_43	43
X_42849368_42849401	70715	2	17	AC	X	34	CTACACGACGCTCTTCCGATCTCCTGTCCTGTTATATGCGTGCTT	CAGACGTGTGCTCTTCCGATCTTTCCTCCTCACACTAGACAAGGG	42849368	42849401	42849253	42849275	42849450	42849472	42849253	42849472	140_43	43
X_123508993_123509026	70933	2	17	AG	X	34	CTACACGACGCTCTTCCGATCTCAAGGTTGTCTTCTGCTCCATGA	CAGACGTGTGCTCTTCCGATCTCTTCAAAATGCCCTGCTGCTTTT	123508993	123509026	123508961	123508983	123509101	123509123	123508961	123509123	140_43	43
X_66915581_66915614	54187	2	17	AC	X	34	CTACACGACGCTCTTCCGATCTCCCACCTTCTCCAGTCTGTCTAA	CAGACGTGTGCTCTTCCGATCTGCTGAGTCAGGGGAAAGAGAAAG	66915581	66915614	66915558	66915580	66915691	66915713	66915558	66915713	142_43	43
X_113641733_113641766	70459	2	17	AC	X	34	CTACACGACGCTCTTCCGATCTGCCACTATGTGTCTATATGCCAGG	CAGACGTGTGCTCTTCCGATCTACAGATAAGAAGACTGAGTTCCATGA	113641733	113641766	113641702	113641725	113641770	113641795	113641702	113641795	142_43	43
X_78941093_78941126	43260	2	17	AC	X	34	CTACACGACGCTCTTCCGATCTGTCGAAGACTCTTGTTCTCTTCCC	CAGACGTGTGCTCTTCCGATCTGCTGCTTGTATCACCTCACTACC	78941093	78941126	78941010	78941033	78941146	78941168	78941010	78941168	143_43	43
X_71770930_71770963	69712	2	17	AC	X	34	CTACACGACGCTCTTCCGATCTTTGTCTCTCATGGATCGTCAGGT	CAGACGTGTGCTCTTCCGATCTTGGACTGTTCTACCAGATCCTCA	71770930	71770963	71770822	71770844	71770971	71770993	71770822	71770993	143_43	43
X_107358349_107358382	71063	2	17	AC	X	34	CTACACGACGCTCTTCCGATCTATATCTGAGGCCCCTAACTGCTT	CAGACGTGTGCTCTTCCGATCTTCTGAATTTATCCCACCCCTCAGT	107358349	107358382	107358283	107358305	107358383	107358406	107358283	107358406	144_43	40
X_110657859_110657892	29222	2	17	AG	X	34	CTACACGACGCTCTTCCGATCTACTCAGCTTAAAGAGCAGGGTCA	CAGACGTGTGCTCTTCCGATCTGTTTGCTTACTCTGTCCCACACA	110657859	110657892	110657820	110657842	110658026	110658048	110657820	110658048	145_42	42
X_107594673_107594706	29382	2	17	AC	X	34	CTACACGACGCTCTTCCGATCTAAAGGAGGTAACTCTCTCTCTCT	CAGACGTGTGCTCTTCCGATCTCCCCAGCTACCCTTCTAACATAC	107594673	107594706	107594651	107594673	107594736	107594758	107594651	107594758	146_42	42
X_56296781_56296814	29381	2	17	AC	X	34	CTACACGACGCTCTTCCGATCTAAAGCTCACCGCAGAATCCATAC	CAGACGTGTGCTCTTCCGATCTGAGCCTGTGCCCATGAGTATAAA	56296781	56296814	56296730	56296752	56296923	56296945	56296730	56296945	147_42	42
X_82585168_82585201	29379	2	17	AC	X	34	CTACACGACGCTCTTCCGATCTAAAATGCACTGAATCGTTTGGCT	CAGACGTGTGCTCTTCCGATCTTAGGTTACTTCAGCAGGGTGTGT	82585168	82585201	82585052	82585074	82585196	82585218	82585052	82585218	153_42	42
X_98917636_98917669	29380	2	17	AC	X	34	CTACACGACGCTCTTCCGATCTAAAGCAGAAGCAATACACTGACA	CAGACGTGTGCTCTTCCGATCTTGGATTTTCAATGCTATGCCAGC	98917636	98917669	98917531	98917553	98917731	98917753	98917531	98917753	153_42	42
X_40984938_40984971	29223	2	17	AG	X	34	CTACACGACGCTCTTCCGATCTACTCTCTTGGCTTTACTCCCTCC	CAGACGTGTGCTCTTCCGATCTACAGCAAACCAAATCCAAAGTAAGC	40984938	40984971	40984855	40984877	40985011	40985035	40984855	40985035	154_42	42
X_107668398_107668431	29767	2	17	AC	X	34	CTACACGACGCTCTTCCGATCTAACACACTGGAAACCAACACTGA	CAGACGTGTGCTCTTCCGATCTGTCTGCACACATAATTCACGCTC	107668398	107668431	107668343	107668365	107668493	107668515	107668343	107668515	155_42	42
X_151140305_151140338	29085	2	17	AC	X	34	CTACACGACGCTCTTCCGATCTGTTTCCTTTGGGGAGGAAAGTGT	CAGACGTGTGCTCTTCCGATCTGCTTTTCACAAGTAAACAGGCCC	151140305	151140338	151140253	151140275	151140434	151140456	151140253	151140456	82_40	40
X_110657859_110657892	29222	2	17	AG	X	34	CTACACGACGCTCTTCCGATCTACTCAGCTTAAAGAGCAGGGTCA	CAGACGTGTGCTCTTCCGATCTGTTTGCTTACTCTGTCCCACACA	110657859	110657892	110657820	110657842	110658026	110658048	110657820	110658048	85_40	40
X_40984938_40984971	29223	2	17	AG	X	34	CTACACGACGCTCTTCCGATCTACTCTCTTGGCTTTACTCCCTCC	CAGACGTGTGCTCTTCCGATCTACAGCAAACCAAATCCAAAGTAAGC	40984938	40984971	40984855	40984877	40985011	40985035	40984855	40985035	85_40	40
X_4253670_4253703	29459	2	17	AT	X	34	CTACACGACGCTCTTCCGATCTACAGAGACCCTCTCTCTCTTCTC	CAGACGTGTGCTCTTCCGATCTACAGGTCCTCTTGGTACAATGTAAT	4253670	4253703	4253599	4253621	4253750	4253774	4253599	4253774	97_40	40
X_103714746_103714779	29463	2	17	AG	X	34	CTACACGACGCTCTTCCGATCTAAGCTGGAGTATTTCCTGGACCT	CAGACGTGTGCTCTTCCGATCTAAATAGAGCAGGGCTGTTTGCTT	103714746	103714779	103714671	103714693	103714814	103714836	103714671	103714836	97_40	40
X_28849110_28849143	28945	2	17	AG	X	34	CTACACGACGCTCTTCCGATCTGTAATTCTCCCAACCTTTGCCCA	CAGACGTGTGCTCTTCCGATCTTGGAAGAAAAGGCTAAGGCAGAG	28849110	28849143	28849082	28849104	28849237	28849259	28849082	28849259	116_40	40
X_5691526_5691559	55343	2	17	AC	X	34	CTACACGACGCTCTTCCGATCTCATTAATTGTTACCAGGGTCGGC	CAGACGTGTGCTCTTCCGATCTTCATTATCCCCAAAGCAACACCA	5691526	5691559	5691437	5691459	5691614	5691636	5691437	5691636	126_40	40
X_111026035_111026068	59959	2	17	AC	X	34	CTACACGACGCTCTTCCGATCTAGTGTTTGATGAGTTTTGACAGGT	CAGACGTGTGCTCTTCCGATCTACAATAGGGAACTTTGGAGGGTG	111026035	111026068	111025980	111026003	111026151	111026173	111025980	111026173	126_40	40
X_63033882_63033915	61679	2	17	AC	X	34	CTACACGACGCTCTTCCGATCTAGCTGTGAAATCCTTCACTGTAT	CAGACGTGTGCTCTTCCGATCTCGTTCTGGATGACATTAGGAGGT	63033882	63033915	63033839	63033861	63033933	63033955	63033839	63033955	126_40	40
X_51062692_51062725	65408	2	17	AC	X	34	CTACACGACGCTCTTCCGATCTACCAGAAATTACCTCTTTTTCAGGCT	CAGACGTGTGCTCTTCCGATCTGGAATTGCCATGACTGGCTTAGA	51062692	51062725	51062661	51062686	51062805	51062827	51062661	51062827	126_40	40
X_5711834_5711867	69832	2	17	AC	X	34	CTACACGACGCTCTTCCGATCTTGTATGCCCATATACCTAAACCCA	CAGACGTGTGCTCTTCCGATCTACCTGGAAACTCTCCCTAGTTCC	5711834	5711867	5711806	5711829	5711939	5711961	5711806	5711961	126_40	40
X_5477218_5477251	69914	2	17	AC	X	34	CTACACGACGCTCTTCCGATCTTGCATAAACTCTCTGATTCATGTTACC	CAGACGTGTGCTCTTCCGATCTTCGATTTCATGAATCCCCTCTTTCC	5477218	5477251	5477185	5477211	5477284	5477308	5477185	5477308	126_40	40
X_4191195_4191228	71225	2	17	AC	X	34	CTACACGACGCTCTTCCGATCTAGCAGAATTGGATCAGATGATTGT	CAGACGTGTGCTCTTCCGATCTAGGTGTATGACCATCACCCAAGA	4191195	4191228	4191149	4191172	4191307	4191329	4191149	4191329	126_40	40
X_39882101_39882134	69816	2	17	AC	X	34	CTACACGACGCTCTTCCGATCTTGTGAGCTCAGATGGAAAAAGGG	CAGACGTGTGCTCTTCCGATCTTGGTTAAATTCACCCTGATTCTGGA	39882101	39882134	39882073	39882095	39882213	39882237	39882073	39882237	127_40	40
X_43363619_43363652	69849	2	17	AC	X	34	CTACACGACGCTCTTCCGATCTTGGGTCATCCATGAAGAAAGCAG	CAGACGTGTGCTCTTCCGATCTAGACACAGTTGGGGGAAAAATCC	43363619	43363652	43363544	43363566	43363719	43363741	43363544	43363741	127_40	40
X_18213093_18213126	69905	2	17	AC	X	34	CTACACGACGCTCTTCCGATCTTGCCTCATGCTGATGGAAATGAT	CAGACGTGTGCTCTTCCGATCTGCCACAGATCTTATAGAGATGTCCCA	18213093	18213126	18213006	18213028	18213145	18213170	18213006	18213170	127_40	40
X_17724611_17724644	69936	2	17	AC	X	34	CTACACGACGCTCTTCCGATCTTGAGTAATGGGAACACTGTGCTA	CAGACGTGTGCTCTTCCGATCTTTTCTTGCGTGAACTCACCTTCA	17724611	17724644	17724545	17724567	17724724	17724746	17724545	17724746	127_40	40
X_28627746_28627779	69950	2	17	AC	X	34	CTACACGACGCTCTTCCGATCTTGACTTCTCAGCATGCATGTTCTT	CAGACGTGTGCTCTTCCGATCTAGGATGAGTAAGAGTTTTCTAGGCA	28627746	28627779	28627722	28627745	28627820	28627844	28627722	28627844	127_40	40
X_98276223_98276256	69955	2	17	AC	X	34	CTACACGACGCTCTTCCGATCTTGACAGGAAAATATGGAACGTGA	CAGACGTGTGCTCTTCCGATCTGGGAATTTCTAGGGTGTCTTTTTGC	98276223	98276256	98276148	98276170	98276260	98276284	98276148	98276284	127_40	40
X_22440209_22440242	69965	2	17	AC	X	34	CTACACGACGCTCTTCCGATCTTGAAGACAGTCAGTGGTGAATGG	CAGACGTGTGCTCTTCCGATCTAGGGACTTGGCATCCATGAATTT	22440209	22440242	22440130	22440152	22440313	22440335	22440130	22440335	127_40	40
X_94944193_94944226	69970	2	17	AC	X	34	CTACACGACGCTCTTCCGATCTTGAAAGGATGCTGGTCTGACTCT	CAGACGTGTGCTCTTCCGATCTCCAGAGGTTTGAGTACATTGTGA	94944193	94944226	94944109	94944131	94944315	94944337	94944109	94944337	127_40	40
X_31260818_31260851	70039	2	17	AC	X	34	CTACACGACGCTCTTCCGATCTTCCCCCAAAACACAGTAACATCT	CAGACGTGTGCTCTTCCGATCTTGCCAACGTATACCCATTTTGCT	31260818	31260851	31260718	31260740	31260920	31260942	31260718	31260942	127_40	40
X_71170856_71170889	70055	2	17	AC	X	34	CTACACGACGCTCTTCCGATCTTCCAATGCCACATATTTGGACCC	CAGACGTGTGCTCTTCCGATCTACCTGTAACTGTGAGATGGCAAA	71170856	71170889	71170820	71170842	71170953	71170975	71170820	71170975	127_40	40
X_28016126_28016159	70065	2	17	AC	X	34	CTACACGACGCTCTTCCGATCTTCATTCGGCTAACAAGGGAACTT	CAGACGTGTGCTCTTCCGATCTTGTAAACATATAACACCCCACAGT	28016126	28016159	28016082	28016104	28016164	28016187	28016082	28016187	127_40	40
X_84748066_84748099	70125	2	17	AC	X	34	CTACACGACGCTCTTCCGATCTTATGAAAGTCGTTGTGGGGAGTG	CAGACGTGTGCTCTTCCGATCTACTCAGACTATGTCAGGGATTGT	84748066	84748099	84748039	84748061	84748129	84748151	84748039	84748151	127_40	40
X_77908615_77908648	70194	2	17	AC	X	34	CTACACGACGCTCTTCCGATCTTAAAGCTTCATCTCCCCACCTCC	CAGACGTGTGCTCTTCCGATCTATCAAGCTGGAGGGAAAAAGCAA	77908615	77908648	77908587	77908609	77908694	77908716	77908587	77908716	127_40	40
X_71530258_71530291	70258	2	17	AC	X	34	CTACACGACGCTCTTCCGATCTGTCTATGGTAAGGGTGTGTCCCT	CAGACGTGTGCTCTTCCGATCTCCTTTGCAGCTTGGCATCATATT	71530258	71530291	71530225	71530247	71530376	71530398	71530225	71530398	127_40	40
X_30151475_30151508	70295	2	17	AC	X	34	CTACACGACGCTCTTCCGATCTGGTATGTGAGTAGGTGTCATTGGG	CAGACGTGTGCTCTTCCGATCTTTAAAACTTTTGGGGCTGGTGGA	30151475	30151508	30151441	30151464	30151569	30151591	30151441	30151591	127_40	40
X_71192717_71192750	70402	2	17	AC	X	34	CTACACGACGCTCTTCCGATCTGCTGTCTTACACTTCTCTGAGGC	CAGACGTGTGCTCTTCCGATCTTCTTGACCTGTGAAAGCAGTCTC	71192717	71192750	71192629	71192651	71192760	71192782	71192629	71192782	127_40	40
X_11532959_11532992	70439	2	17	AC	X	34	CTACACGACGCTCTTCCGATCTGCCCTCTTCACCTTTGTCTATGC	CAGACGTGTGCTCTTCCGATCTGAGGGTGGAATTCAAAGCCTCAT	11532959	11532992	11532932	11532954	11533042	11533064	11532932	11533064	127_40	40
X_80682785_80682818	70450	2	17	AC	X	34	CTACACGACGCTCTTCCGATCTGCCAGTTAATACACACACCGTCT	CAGACGTGTGCTCTTCCGATCTTGCAAGGGAAAGAAAACTACCCT	80682785	80682818	80682744	80682766	80682893	80682915	80682744	80682915	127_40	40
X_97223061_97223094	70466	2	17	AC	X	34	CTACACGACGCTCTTCCGATCTGCATGTGGGTATTCGGCTCTAAA	CAGACGTGTGCTCTTCCGATCTCAGTCTGTTTTCTGTGTGTGTGC	97223061	97223094	97222954	97222976	97223105	97223127	97222954	97223127	127_40	40
X_113684582_113684615	70499	2	17	AC	X	34	CTACACGACGCTCTTCCGATCTGCAAATATTATAGCGGAAACCACCA	CAGACGTGTGCTCTTCCGATCTTTGCTAAAGGCAAATTCTAGTCAA	113684582	113684615	113684532	113684556	113684622	113684645	113684532	113684645	127_40	40
X_112095722_112095755	70623	2	17	AC	X	34	CTACACGACGCTCTTCCGATCTCTGGAGCAAGACTGGGGAAATTA	CAGACGTGTGCTCTTCCGATCTTTAGGCACTGTGAGCTACATATC	112095722	112095755	112095649	112095671	112095811	112095833	112095649	112095833	127_40	40
X_87989866_87989899	70692	2	17	AC	X	34	CTACACGACGCTCTTCCGATCTCGATGTGTGTCCCTTCATGTTCT	CAGACGTGTGCTCTTCCGATCTGCATGGATTGCAGGGAAACTCTA	87989866	87989899	87989825	87989847	87989929	87989951	87989825	87989951	127_40	40
X_98808170_98808203	70707	2	17	AC	X	34	CTACACGACGCTCTTCCGATCTCCTTCCTCTCCCTCCTACTCTTG	CAGACGTGTGCTCTTCCGATCTTAGAGTTGATATGCACACACGCA	98808170	98808203	98808108	98808130	98808211	98808233	98808108	98808233	127_40	40
X_47364922_47364955	70744	2	17	AC	X	34	CTACACGACGCTCTTCCGATCTCCTATATTCCTGAATTTGAGTTGGACA	CAGACGTGTGCTCTTCCGATCTGCTGTGTTGGTCGTTGTTTGTAG	47364922	47364955	47364852	47364878	47364983	47365005	47364852	47365005	127_40	40
X_106710220_106710253	70896	2	17	AC	X	34	CTACACGACGCTCTTCCGATCTCAGAAAGACATGAGGCTGGAGTC	CAGACGTGTGCTCTTCCGATCTCCTGCAAAATTCTGGGTGTCTCT	106710220	106710253	106710162	106710184	106710342	106710364	106710162	106710364	127_40	40
X_12581359_12581392	71001	2	17	AC	X	34	CTACACGACGCTCTTCCGATCTATGGGCTGTCAATGTTGAAACTG	CAGACGTGTGCTCTTCCGATCTGAAAAGCTCTGTGAGCAGTCTGT	12581359	12581392	12581256	12581278	12581415	12581437	12581256	12581437	127_40	40
X_32805331_32805364	71028	2	17	AC	X	34	CTACACGACGCTCTTCCGATCTATGAACCAGCCTTCAGGAGACTT	CAGACGTGTGCTCTTCCGATCTCCTCAGAGTGGTTCTCTCTCTCT	32805331	32805364	32805256	32805278	32805392	32805414	32805256	32805414	127_40	40
X_38703687_38703720	71050	2	17	AC	X	34	CTACACGACGCTCTTCCGATCTATCCAGATGTTATGGAGCAAAGT	CAGACGTGTGCTCTTCCGATCTTGAAACCAAATTATGCGACCAGA	38703687	38703720	38703620	38703642	38703808	38703830	38703620	38703830	127_40	40
X_21651109_21651142	71115	2	17	AC	X	34	CTACACGACGCTCTTCCGATCTAGTATGTGTATATAGGTGTTCATGTGT	CAGACGTGTGCTCTTCCGATCTGAACTCTGTGGAACTTTGACCCT	21651109	21651142	21651063	21651089	21651164	21651186	21651063	21651186	127_40	40
X_64318106_64318139	71125	2	17	AC	X	34	CTACACGACGCTCTTCCGATCTAGTACCTGATATGAATGAGGGAGA	CAGACGTGTGCTCTTCCGATCTTGTGTTCAAATTACTTTGTGGTTCCT	64318106	64318139	64318021	64318044	64318202	64318227	64318021	64318227	127_40	40
X_5763916_5763949	71183	2	17	AC	X	34	CTACACGACGCTCTTCCGATCTAGGAAAACCAATGTGAAATGGAAA	CAGACGTGTGCTCTTCCGATCTCGTGGACAAAATCACTTGAAGCA	5763916	5763949	5763871	5763894	5764007	5764029	5763871	5764029	127_40	40
X_42381932_42381965	71228	2	17	AC	X	34	CTACACGACGCTCTTCCGATCTAGCACTCCATTTTGTGGCAGTAA	CAGACGTGTGCTCTTCCGATCTAACAACAAACTACTGATGAGGCT	42381932	42381965	42381825	42381847	42382014	42382036	42381825	42382036	127_40	40
X_15089165_15089198	71266	2	17	AC	X	34	CTACACGACGCTCTTCCGATCTAGAAGGAATGTGTGGAGGCTACT	CAGACGTGTGCTCTTCCGATCTCACCCCATTCTCACCAACACATA	15089165	15089198	15089106	15089128	15089221	15089243	15089106	15089243	127_40	40
X_33213850_33213883	71292	2	17	AC	X	34	CTACACGACGCTCTTCCGATCTACTTAGGATTATCCCATCCTGTTCT	CAGACGTGTGCTCTTCCGATCTACTCAGGCATCATTCAGATTGGA	33213850	33213883	33213821	33213845	33213919	33213941	33213821	33213941	127_40	40
X_54827834_54827867	71347	2	17	AC	X	34	CTACACGACGCTCTTCCGATCTACCTGACACGTAGTAGACACTCA	CAGACGTGTGCTCTTCCGATCTTGCTTTGTATTTGGCCAAGACTTT	54827834	54827867	54827737	54827759	54827880	54827903	54827737	54827903	127_40	40
X_39702231_39702264	71401	2	17	AC	X	34	CTACACGACGCTCTTCCGATCTACAGTTTGAGGGCTTCGTTTACA	CAGACGTGTGCTCTTCCGATCTAAAAGAAGGAGGCCCGTATGAAG	39702231	39702264	39702148	39702170	39702320	39702342	39702148	39702342	127_40	40
X_31495914_31495947	71436	2	17	AC	X	34	CTACACGACGCTCTTCCGATCTACACCTAGACTCCTGGCTTTTGA	CAGACGTGTGCTCTTCCGATCTACAGGGCAAGAAATCACTTTGACT	31495914	31495947	31495835	31495857	31495979	31496002	31495835	31496002	127_40	40
X_29458108_29458141	71530	2	17	AC	X	34	CTACACGACGCTCTTCCGATCTAAGCCTGCACAGCTACGTTAAAT	CAGACGTGTGCTCTTCCGATCTTGACAAATGCAGATGTTTTACCAC	29458108	29458141	29458044	29458066	29458146	29458169	29458044	29458169	127_40	40
X_104694900_104694933	71557	2	17	AC	X	34	CTACACGACGCTCTTCCGATCTAACGAAGACCACAACTCAGTCTT	CAGACGTGTGCTCTTCCGATCTAATCCATCTCACTGGGGGAAAAA	104694900	104694933	104694869	104694891	104694982	104695004	104694869	104695004	127_40	40
X_29331371_29331404	69680	2	17	AC	X	34	CTACACGACGCTCTTCCGATCTTTTTGACCTGAGAGCAGGAACAG	CAGACGTGTGCTCTTCCGATCTACAGACTATGAGCGTGAGAATGC	29331371	29331404	29331304	29331326	29331416	29331438	29331304	29331438	128_31	31
X_35967258_35967291	69757	2	17	AC	X	34	CTACACGACGCTCTTCCGATCTTTCATTGCTAGAATGTGCAGTCA	CAGACGTGTGCTCTTCCGATCTCAAGCTCCTATCAGGGTTCACAC	35967258	35967291	35967171	35967193	35967357	35967379	35967171	35967379	128_31	31
X_33246396_33246429	69947	2	17	AC	X	34	CTACACGACGCTCTTCCGATCTTGAGAAGTATGATGTTATTGAACCCA	CAGACGTGTGCTCTTCCGATCTTGCTAACGTGGAGAGAGAGACAT	33246396	33246429	33246340	33246365	33246471	33246493	33246340	33246493	128_31	31
X_44051308_44051341	69988	2	17	AC	X	34	CTACACGACGCTCTTCCGATCTTCTGTGGCATAACCCATTTCATCT	CAGACGTGTGCTCTTCCGATCTAAAAATTGGAGCAGCATTGGACA	44051308	44051341	44051211	44051234	44051358	44051380	44051211	44051380	128_31	31
X_139589110_139589143	69997	2	17	AC	X	34	CTACACGACGCTCTTCCGATCTTCTGGAAGGCTTCTGTGTGTAGA	CAGACGTGTGCTCTTCCGATCTACGTACTTATCAGCTCACGTTCG	139589110	139589143	139589083	139589105	139589168	139589190	139589083	139589190	128_31	31
X_147392009_147392042	70032	2	17	AC	X	34	CTACACGACGCTCTTCCGATCTTCCCTTCCATGCTCTCCTAAACA	CAGACGTGTGCTCTTCCGATCTGCCTTCAGTGCTGAGATGTCATA	147392009	147392042	147391965	147391987	147392126	147392148	147391965	147392148	128_31	31
X_11103432_11103465	70040	2	17	AC	X	34	CTACACGACGCTCTTCCGATCTTCCCCAAATACCCAGGCTAGAAT	CAGACGTGTGCTCTTCCGATCTCTGGTGCCTTACTCTGACATTCC	11103432	11103465	11103369	11103391	11103522	11103544	11103369	11103544	128_31	31
X_64084817_64084850	70115	2	17	AC	X	34	CTACACGACGCTCTTCCGATCTTCAAAAGGAAAAATATTGTAAGGGCA	CAGACGTGTGCTCTTCCGATCTCGTGCCTTTTGATAATGCAGTGA	64084817	64084850	64084727	64084752	64084937	64084959	64084727	64084959	128_31	31
X_146743380_146743413	70129	2	17	AC	X	34	CTACACGACGCTCTTCCGATCTTATAGTGTGCCCATTGATGACACG	CAGACGTGTGCTCTTCCGATCTACTCTCATGATGGTACATTTTCATGC	146743380	146743413	146743276	146743299	146743426	146743451	146743276	146743451	128_31	31
X_145745532_145745565	70144	2	17	AC	X	34	CTACACGACGCTCTTCCGATCTTAGGAACTTCAAGCCTCCACTCT	CAGACGTGTGCTCTTCCGATCTCTTGAAAACAATGTGCGTCCTCC	145745532	145745565	145745431	145745453	145745589	145745611	145745431	145745611	128_31	31
X_55049625_55049658	70190	2	17	AC	X	34	CTACACGACGCTCTTCCGATCTTAACAAAAGCATGGGTGTGGTGA	CAGACGTGTGCTCTTCCGATCTAAGTCATGCAGAGTTCCACCATT	55049625	55049658	55049590	55049612	55049700	55049722	55049590	55049722	128_31	31
X_48315004_48315037	70195	2	17	AC	X	34	CTACACGACGCTCTTCCGATCTTAAAGCTTCAGTGAGCCGTGATG	CAGACGTGTGCTCTTCCGATCTGCCTGAGCAATGCAACAGATTTT	48315004	48315037	48314898	48314920	48315084	48315106	48314898	48315106	128_31	31
X_147904229_147904262	70200	2	17	AC	X	34	CTACACGACGCTCTTCCGATCTGTTTTGGCACTATTCACTGTGCT	CAGACGTGTGCTCTTCCGATCTCCAGGAAAAGAGCAGGATGAGTC	147904229	147904262	147904135	147904157	147904347	147904369	147904135	147904369	128_31	31
X_45204444_45204477	70232	2	17	AC	X	34	CTACACGACGCTCTTCCGATCTGTGGGAAGGTTTTAGTAGCCCAG	CAGACGTGTGCTCTTCCGATCTGCTCAACAATGATACACACACGC	45204444	45204477	45204337	45204359	45204481	45204503	45204337	45204503	128_31	31
X_44628568_44628601	70248	2	17	AC	X	34	CTACACGACGCTCTTCCGATCTGTGAGTGTACTTTGTGCCACTGA	CAGACGTGTGCTCTTCCGATCTGTCTCCAGTGAGAATGCTTCCAG	44628568	44628601	44628488	44628510	44628645	44628667	44628488	44628667	128_31	31
X_19816009_19816042	70252	2	17	AC	X	34	CTACACGACGCTCTTCCGATCTGTGACTGGCAAGGGAACACTATC	CAGACGTGTGCTCTTCCGATCTTGTAGGACACCGTCATGGTACTT	19816009	19816042	19815909	19815931	19816123	19816145	19815909	19816145	128_31	31
X_36874753_36874786	70505	2	17	AC	X	34	CTACACGACGCTCTTCCGATCTGATTGTGAGTAGTTGCTGCCTCA	CAGACGTGTGCTCTTCCGATCTTTCTTTGCAAAAACCCACTTAACA	36874753	36874786	36874717	36874739	36874812	36874835	36874717	36874835	128_31	31
X_17447348_17447381	70510	2	17	AC	X	34	CTACACGACGCTCTTCCGATCTGATGCATCTGCCTGTGTGTACTG	CAGACGTGTGCTCTTCCGATCTAAGCACTTGGAAAACATTGCAGG	17447348	17447381	17447320	17447342	17447422	17447444	17447320	17447444	128_31	31
X_14359457_14359490	70637	2	17	AC	X	34	CTACACGACGCTCTTCCGATCTCTCTTTGTGATACCGAAGAGCGA	CAGACGTGTGCTCTTCCGATCTTGGGCTTTCAGCACAACAGATAA	14359457	14359490	14359379	14359401	14359491	14359513	14359379	14359513	128_31	31
X_140262529_140262562	70708	2	17	AC	X	34	CTACACGACGCTCTTCCGATCTCCTTCCACTTGTCCTCTTGCTAC	CAGACGTGTGCTCTTCCGATCTAGACTCAGCTTTGGGGATAGGAG	140262529	140262562	140262447	140262469	140262617	140262639	140262447	140262639	128_31	31
X_34933585_34933618	70750	2	17	AC	X	34	CTACACGACGCTCTTCCGATCTCCTAAAACACAGATGGGAACGGT	CAGACGTGTGCTCTTCCGATCTATGCTGAGACTGCCTTCTAGTTG	34933585	34933618	34933520	34933542	34933676	34933698	34933520	34933698	128_31	31
X_29735321_29735354	70801	2	17	AC	X	34	CTACACGACGCTCTTCCGATCTCCATATTTAGTGCCAGAGAGCCA	CAGACGTGTGCTCTTCCGATCTTCCATCCCATCAGGACAGACTTT	29735321	29735354	29735294	29735316	29735392	29735414	29735294	29735414	128_31	31
X_38310481_38310514	70829	2	17	AC	X	34	CTACACGACGCTCTTCCGATCTCCACATATTTCCTTCCCCCTCCT	CAGACGTGTGCTCTTCCGATCTTACGTATAGCTTGCCACCTTTGG	38310481	38310514	38310404	38310426	38310533	38310555	38310404	38310555	128_31	31
X_118498920_118498953	70836	2	17	AC	X	34	CTACACGACGCTCTTCCGATCTCCAAATCCATCCCATCACTGGTT	CAGACGTGTGCTCTTCCGATCTTCACGAGTCACAAAACATTTTTCTTC	118498920	118498953	118498873	118498895	118499002	118499027	118498873	118499027	128_31	31
X_43178073_43178106	70838	2	17	AC	X	34	CTACACGACGCTCTTCCGATCTCCAAACTTCTGGGCTCCTTTGAT	CAGACGTGTGCTCTTCCGATCTTTGTATCTCTGATCCTCTGCACT	43178073	43178106	43178003	43178025	43178163	43178185	43178003	43178185	128_31	31
X_34413327_34413360	71210	2	17	AC	X	34	CTACACGACGCTCTTCCGATCTAGCCTCTAACAAAGCTGGCAAAA	CAGACGTGTGCTCTTCCGATCTTAGTCGTTTAAATGGCTGCAGGA	34413327	34413360	34413294	34413316	34413398	34413420	34413294	34413420	128_31	31
X_45322767_45322800	71304	2	17	AC	X	34	CTACACGACGCTCTTCCGATCTACTGAGCTTTCAGAGTTCTTTACA	CAGACGTGTGCTCTTCCGATCTTGAAAAGACAAGATGCATACTGGGA	45322767	45322800	45322719	45322742	45322846	45322870	45322719	45322870	128_31	31
X_14194047_14194080	71312	2	17	AC	X	34	CTACACGACGCTCTTCCGATCTACTCGGTATATCTTTCCCAGCCT	CAGACGTGTGCTCTTCCGATCTAGGAGGGAAATTTGTCCACAACC	14194047	14194080	14193937	14193959	14194167	14194189	14193937	14194189	128_31	31
X_122622934_122622967	71396	2	17	AC	X	34	CTACACGACGCTCTTCCGATCTACATGCAAGATTCCAGTATGCGA	CAGACGTGTGCTCTTCCGATCTCCCAAACACTGGGAGACAGATTT	122622934	122622967	122622831	122622853	122623038	122623060	122622831	122623060	128_31	31
X_33099092_33099125	71534	2	17	AC	X	34	CTACACGACGCTCTTCCGATCTAAGCACTTATTTTCCAAGCCAAT	CAGACGTGTGCTCTTCCGATCTTCAGTGCCAAATCTTCTGTCTGT	33099092	33099125	33099045	33099067	33099141	33099163	33099045	33099163	128_31	31
X_35887249_35887282	71581	2	17	AC	X	34	CTACACGACGCTCTTCCGATCTAAATGTGAGGCAGAAGACATGGT	CAGACGTGTGCTCTTCCGATCTTCTTCACATCTTATTGCTCTTGCT	35887249	35887282	35887222	35887244	35887302	35887325	35887222	35887325	128_31	31
X_104866272_104866304	28777	3	11	AAT	X	33	CTACACGACGCTCTTCCGATCTCAGTAGAAGCACAATAAATAAGGTTCA	CAGACGTGTGCTCTTCCGATCTACATGATGTTTGGCTGAACTGGT	104866272	104866304	104866215	104866241	104866339	104866361	104866215	104866361	145_42	42
X_10594352_10594384	28778	3	11	AAT	X	33	CTACACGACGCTCTTCCGATCTCCTCAGTTTACTTGGGGCAGAAA	CAGACGTGTGCTCTTCCGATCTGCAATATGAGTGTGCCTGTGACT	10594352	10594384	10594269	10594291	10594431	10594453	10594269	10594453	145_42	42
X_97118020_97118052	28828	3	11	AGC	X	33	CTACACGACGCTCTTCCGATCTTATCTTCCTCTATCTGGCCCCTG	CAGACGTGTGCTCTTCCGATCTGCATTGTTTTTGCTGCTGTTGTG	97118020	97118052	97117980	97118002	97118060	97118082	97117980	97118082	145_42	42
X_16967193_16967225	28811	3	11	ACC	X	33	CTACACGACGCTCTTCCGATCTGAACATTGAAGGCATCCTGGACA	CAGACGTGTGCTCTTCCGATCTAAAGTGGATGGAGCATACACACA	16967193	16967225	16967106	16967128	16967226	16967248	16967106	16967248	146_42	42
17_49933722_49933754	29839	3	11	AAC	17	33	CTACACGACGCTCTTCCGATCTGGGTCATCCACATGAAAACTGGT	CAGACGTGTGCTCTTCCGATCTTGTAAAGCATTTGGAGACCAGGG	49933722	49933754	49933680	49933702	49933757	49933779	49933680	49933779	146_42	42
X_99142827_99142859	28780	3	11	AAT	X	33	CTACACGACGCTCTTCCGATCTTCTTGTTCTCTGTTCCAGTGTGC	CAGACGTGTGCTCTTCCGATCTGTGGAAGCCTCCAAAAGCAGTAG	99142827	99142859	99142741	99142763	99142864	99142886	99142741	99142886	148_42	42
X_135849998_135850030	28827	3	11	AGC	X	33	CTACACGACGCTCTTCCGATCTCTGGATCGCAGAAGTAGGAACTG	CAGACGTGTGCTCTTCCGATCTGTACACCGCGGCTTTTGCTG	135849998	135850030	135849953	135849975	135850048	135850067	135849953	135850067	148_42	42
X_39805705_39805737	28776	3	11	AAT	X	33	CTACACGACGCTCTTCCGATCTACTTGAAACAGCAATTGGCACAC	CAGACGTGTGCTCTTCCGATCTTGAGAAGGAGGAAAGGGAAGGAG	39805705	39805737	39805651	39805673	39805765	39805787	39805651	39805787	150_42	42
X_23244563_23244595	28781	3	11	AAT	X	33	CTACACGACGCTCTTCCGATCTTGCTTGGTCACCTCAACATCAAA	CAGACGTGTGCTCTTCCGATCTCAGATGGTTATGTTCCTCCCTGG	23244563	23244595	23244465	23244487	23244671	23244693	23244465	23244693	150_42	42
X_106465141_106465173	28779	3	11	AAT	X	33	CTACACGACGCTCTTCCGATCTGGCATTCCTATTGGCAAATGGTC	CAGACGTGTGCTCTTCCGATCTTTTGGGCCTCCAGGAATACAATG	106465141	106465173	106465047	106465069	106465241	106465263	106465047	106465263	151_42	42
X_6557368_6557400	28840	3	11	AGT	X	33	CTACACGACGCTCTTCCGATCTGCCCTTCAATCTGGGTAACAGAG	CAGACGTGTGCTCTTCCGATCTGCCAATAGACACACAAAAGATGCT	6557368	6557400	6557327	6557349	6557406	6557429	6557327	6557429	151_42	42
X_138317241_138317273	28796	3	11	AGT	X	33	CTACACGACGCTCTTCCGATCTTAATGTGGTGACTGGGTCTCACT	CAGACGTGTGCTCTTCCGATCTCTGGCCTTGAACTTTTCTGGTTG	138317241	138317273	138317158	138317180	138317326	138317348	138317158	138317348	152_42	42
X_122899082_122899114	28848	3	11	CCG	X	33	CTACACGACGCTCTTCCGATCTCCCGGATGTCATCTTATCCTCCT	CAGACGTGTGCTCTTCCGATCTTAGCTGTGCTTTCAGTTGAGGTC	122899082	122899114	122898986	122899008	122899188	122899210	122898986	122899210	96_40	40
X_23352905_23352937	28849	3	11	CCG	X	33	CTACACGACGCTCTTCCGATCTCGGGAGAGCTCAGGGTCTCG	CAGACGTGTGCTCTTCCGATCTGAGAAACACGTCCTCAAGCCC	23352905	23352937	23352850	23352869	23353016	23353036	23352850	23353036	96_40	40
X_83442984_83443016	28850	3	11	CCG	X	33	CTACACGACGCTCTTCCGATCTCTTCAGGAGCACTCAAACAGGAG	CAGACGTGTGCTCTTCCGATCTTCTTCTCTATGGGAATCACCGGG	83442984	83443016	83442913	83442935	83443102	83443124	83442913	83443124	96_40	40
X_81657874_81657906	28742	3	11	AAC	X	33	CTACACGACGCTCTTCCGATCTACCGAAGCTCTGAAAAAGTTGGT	CAGACGTGTGCTCTTCCGATCTGGGACTTTCAGGTTGGATGAGTG	81657874	81657906	81657851	81657873	81657960	81657982	81657851	81657982	113_40	40
X_144746972_144747004	28743	3	11	AAC	X	33	CTACACGACGCTCTTCCGATCTAGTTACAATTAAAGCCAGCCGGT	CAGACGTGTGCTCTTCCGATCTCAGTTGGTCAAGTCTGACAGGAG	144746972	144747004	144746911	144746933	144747015	144747037	144746911	144747037	113_40	40
X_13616678_13616710	28744	3	11	AAC	X	33	CTACACGACGCTCTTCCGATCTCACATGACCACATTTCCAAAGGC	CAGACGTGTGCTCTTCCGATCTTCGAGGGTGACTTTCTTCTCTGT	13616678	13616710	13616569	13616591	13616728	13616750	13616569	13616750	113_40	40
X_58029254_58029286	28745	3	11	AAC	X	33	CTACACGACGCTCTTCCGATCTCGAGAGATTCCCTCCTGTGCTTA	CAGACGTGTGCTCTTCCGATCTGAACTCACTGAGCCAGAACACTT	58029254	58029286	58029157	58029179	58029371	58029393	58029157	58029393	113_40	40
X_21059234_21059266	28746	3	11	AAC	X	33	CTACACGACGCTCTTCCGATCTCTTCTTTGCTGGGTTACCCCTTT	CAGACGTGTGCTCTTCCGATCTAGAGAGGTTTAGGTGTCTGAGGA	21059234	21059266	21059190	21059212	21059304	21059326	21059190	21059326	113_40	40
X_68996989_68997021	28747	3	11	AAC	X	33	CTACACGACGCTCTTCCGATCTTGTTTGTTTCTGTTGATTCTGGGT	CAGACGTGTGCTCTTCCGATCTCAAAATACTCACCTACCCACCCC	68996989	68997021	68996964	68996987	68997105	68997127	68996964	68997127	113_40	40
2_184888069_184888101	29849	3	11	AAC	2	33	CTACACGACGCTCTTCCGATCTCCCTGTAAGGCTGAAAGAGGAAA	CAGACGTGTGCTCTTCCGATCTTGAATGACCTCAATAGAGCCCCA	184888069	184888101	184887998	184888020	184888108	184888130	184887998	184888130	118_40	40
2_23939309_23939341	29854	3	11	AAC	2	33	CTACACGACGCTCTTCCGATCTATCAGGTATATTAGCCTGCACCT	CAGACGTGTGCTCTTCCGATCTAGAGATTGCATGGGTAGAGCAGA	23939309	23939341	23939270	23939292	23939351	23939373	23939270	23939373	118_40	40
1_79319636_79319668	29799	3	11	AAC	1	33	CTACACGACGCTCTTCCGATCTAATTTGGTCAGTTGCCCCTTTCT	CAGACGTGTGCTCTTCCGATCTACTGAAAAACTACAAGCCCACCT	79319636	79319668	79319603	79319625	79319691	79319713	79319603	79319713	119_40	40
12_28200703_28200735	29814	3	11	AAC	12	33	CTACACGACGCTCTTCCGATCTAGCCTTGACAGCATTGTCAATCA	CAGACGTGTGCTCTTCCGATCTTTCCAGGGAACAGACACTAGAGG	28200703	28200735	28200658	28200680	28200744	28200766	28200658	28200766	119_40	40
4_67753508_67753540	29880	3	11	AAC	4	33	CTACACGACGCTCTTCCGATCTTGAGGACCTTACAGCTCCATTGT	CAGACGTGTGCTCTTCCGATCTGCTTTGCCTTCTGTGCTCTATGA	67753508	67753540	67753466	67753488	67753568	67753590	67753466	67753590	119_40	40
5_108460289_108460321	29884	3	11	AAC	5	33	CTACACGACGCTCTTCCGATCTTGAAGCATAATATCTGCCAGCTT	CAGACGTGTGCTCTTCCGATCTGCCCAGAGTCACAGTTTTGAGAT	108460289	108460321	108460220	108460242	108460362	108460384	108460220	108460384	119_40	40
8_10331286_10331318	29912	3	11	AAC	8	33	CTACACGACGCTCTTCCGATCTTGCACAAAGGTTGATGCTTTTCC	CAGACGTGTGCTCTTCCGATCTTACCTGAAGTGGCATTCGATGAG	10331286	10331318	10331262	10331284	10331326	10331348	10331262	10331348	119_40	40
12_122402052_122402084	29938	3	11	AAC	12	33	CTACACGACGCTCTTCCGATCTGGCTCAGGCTTGAAGACTATCAT	CAGACGTGTGCTCTTCCGATCTCTTGTGCCTTCTGGGAAAGAACT	122402052	122402084	122401971	122401993	122402090	122402112	122401971	122402112	119_40	40
18_24245910_24245942	29951	3	11	AAC	18	33	CTACACGACGCTCTTCCGATCTTCTAGAGATGCCTGTTGTGTCCA	CAGACGTGTGCTCTTCCGATCTCAGAGAGTGGCACCCTTATAGGA	24245910	24245942	24245802	24245824	24246016	24246038	24245802	24246038	119_40	40
2_68559813_68559845	29961	3	11	AAC	2	33	CTACACGACGCTCTTCCGATCTACCAAACAACTTGAACCAACACA	CAGACGTGTGCTCTTCCGATCTCTGAGTTTCTGGATTGCAGGGTT	68559813	68559845	68559733	68559755	68559917	68559939	68559733	68559939	119_40	40
5_137297004_137297036	29968	3	11	AAC	5	33	CTACACGACGCTCTTCCGATCTAGTTGAAGTTGAAGAGGAGAGAGC	CAGACGTGTGCTCTTCCGATCTTAACAACATTAACAGGCACCCCC	137297004	137297036	137296970	137296993	137297096	137297118	137296970	137297118	119_40	40
5_148360206_148360238	29969	3	11	AAC	5	33	CTACACGACGCTCTTCCGATCTGAGGAATCCTGGGGTTCTGTAGT	CAGACGTGTGCTCTTCCGATCTCTTAGCAAGTGGCTTCCAACTCT	148360206	148360238	148360117	148360139	148360308	148360330	148360117	148360330	119_40	40
8_25730196_25730228	29979	3	11	AAC	8	33	CTACACGACGCTCTTCCGATCTAGCCCACAGAACTAGAGGATCAC	CAGACGTGTGCTCTTCCGATCTATTGCCAGTCAGTGTCTGTCTTC	25730196	25730228	25730092	25730114	25730276	25730298	25730092	25730298	119_40	40
5_164339180_164339212	29970	3	11	AAC	5	33	CTACACGACGCTCTTCCGATCTAAGGCTGCCATAATATTTGCCGT	CAGACGTGTGCTCTTCCGATCTGCCTTGCTGTACTTTAGAAGGCT	164339180	164339212	164339094	164339116	164339269	164339291	164339094	164339291	120_40	40
X_69116250_69116281	49202	2	16	AC	X	32	CTACACGACGCTCTTCCGATCTGACTGGTGTGACATCTTGGTCTG	CAGACGTGTGCTCTTCCGATCTCGAAACCATCCATCTTCCTCCTC	69116250	69116281	69116163	69116185	69116315	69116337	69116163	69116337	136_43	43
Y_21642857_21642888	58044	2	16	AC	Y	32	CTACACGACGCTCTTCCGATCTATTCTGCCAAGAGGTACAGGAGT	CAGACGTGTGCTCTTCCGATCTAAGATGTGTAGCAGCTGTGGTTC	21642857	21642888	21642817	21642839	21642908	21642930	21642817	21642930	136_43	43
X_25410380_25410411	69957	2	16	AC	X	32	CTACACGACGCTCTTCCGATCTTGACAATTGGATTAGGCTATGGCT	CAGACGTGTGCTCTTCCGATCTCTTGTGAAATTACCTGGCCCTCA	25410380	25410411	25410309	25410332	25410471	25410493	25410309	25410493	136_43	43
X_128242597_128242628	71130	2	16	AC	X	32	CTACACGACGCTCTTCCGATCTAGTAACTCCCAAGATGTGAGCAT	CAGACGTGTGCTCTTCCGATCTGGATCTGGTTTCCATTGCCTCTT	128242597	128242628	128242539	128242561	128242716	128242738	128242539	128242738	136_43	43
Y_18419714_18419745	39350	2	16	AC	Y	32	CTACACGACGCTCTTCCGATCTTCCAGGAAAGTAGATGGTGCTGA	CAGACGTGTGCTCTTCCGATCTGGCTTTTTGCACTAACAGCAACT	18419714	18419745	18419668	18419690	18419757	18419779	18419668	18419779	137_43	43
X_100520638_100520669	69829	2	16	AC	X	32	CTACACGACGCTCTTCCGATCTTGTCAAGCAAGCTGACACATTCA	CAGACGTGTGCTCTTCCGATCTTATTGTTCTGTGGGACGAGGGAT	100520638	100520669	100520605	100520627	100520748	100520770	100520605	100520770	137_43	43
X_107088723_107088754	70815	2	16	AC	X	32	CTACACGACGCTCTTCCGATCTCCAGCACTGGAGTAAGCCTTTTA	CAGACGTGTGCTCTTCCGATCTCCAGTCTTGCTGAGAGAGAGAGA	107088723	107088754	107088687	107088709	107088777	107088799	107088687	107088799	137_43	43
X_107088756_107088787	70815	2	16	AG	X	32	CTACACGACGCTCTTCCGATCTCCAGCACTGGAGTAAGCCTTTTA	CAGACGTGTGCTCTTCCGATCTCCAGTCTTGCTGAGAGAGAGAGA	107088756	107088787	107088687	107088709	107088777	107088799	107088687	107088799	137_43	43
X_124194031_124194062	70937	2	16	AC	X	32	CTACACGACGCTCTTCCGATCTCAAGCCCCATAACTGCGTAAGAT	CAGACGTGTGCTCTTCCGATCTTGGGATTTGACTTAGGTGATCTGT	124194031	124194062	124193933	124193955	124194138	124194161	124193933	124194161	137_43	43
X_38565669_38565700	71543	2	16	AC	X	32	CTACACGACGCTCTTCCGATCTAAGACAGTTGAGAACCAAGCCAG	CAGACGTGTGCTCTTCCGATCTATTTCACGAGTCACCCATCACAG	38565669	38565700	38565561	38565583	38565790	38565812	38565561	38565812	137_43	43
Y_10017071_10017102	63245	2	16	AC	Y	32	CTACACGACGCTCTTCCGATCTAGACAGGGTCCCAAATCAAACAC	CAGACGTGTGCTCTTCCGATCTTAGAGGCTGGGGTGTGTTTTACT	10017071	10017102	10017009	10017031	10017165	10017187	10017009	10017187	138_43	43
X_6128284_6128315	69729	2	16	AC	X	32	CTACACGACGCTCTTCCGATCTTTGCAGTTGATTCTTTGTGCGTG	CAGACGTGTGCTCTTCCGATCTAGCAAAGATAGAGGGGTGTCAGA	6128284	6128315	6128247	6128269	6128347	6128369	6128247	6128369	138_43	43
X_127752562_127752593	70050	2	16	AC	X	32	CTACACGACGCTCTTCCGATCTTCCAGTAGTTTCAATGCCCAAAGA	CAGACGTGTGCTCTTCCGATCTGGCTACAAGCATCGTATAGTGTGA	127752562	127752593	127752495	127752518	127752600	127752623	127752495	127752623	138_43	43
X_22985693_22985724	70169	2	16	AC	X	32	CTACACGACGCTCTTCCGATCTTACATATGCACGCACATCCACTC	CAGACGTGTGCTCTTCCGATCTCACACTACACTTCTGTGGGAAGG	22985693	22985724	22985659	22985681	22985770	22985792	22985659	22985792	138_43	43
X_50186703_50186734	70501	2	16	AC	X	32	CTACACGACGCTCTTCCGATCTGCAAAAGCAAGAGAATGACATTGGT	CAGACGTGTGCTCTTCCGATCTTTTGTGCCTACGGTACAGTTCAG	50186703	50186734	50186629	50186653	50186795	50186817	50186629	50186817	138_43	43
X_42325649_42325680	70998	2	16	AC	X	32	CTACACGACGCTCTTCCGATCTATGGGTTCCAACTCCTGGATCAT	CAGACGTGTGCTCTTCCGATCTAAAGACATCCTGCCTAGTTCCCA	42325649	42325680	42325581	42325603	42325686	42325708	42325581	42325708	138_43	43
X_133789363_133789394	71083	2	16	AC	X	32	CTACACGACGCTCTTCCGATCTAGTTGCTGTGTAGTTCTGTTTCT	CAGACGTGTGCTCTTCCGATCTTGGGAATGTGTTATGATGCCTGT	133789363	133789394	133789324	133789346	133789410	133789432	133789324	133789432	138_43	43
X_30336456_30336487	69734	2	16	AC	X	32	CTACACGACGCTCTTCCGATCTTTGAGCCACATGTTTCTGGTTGA	CAGACGTGTGCTCTTCCGATCTAGTCTCTGCACCTAATACTGCAC	30336456	30336487	30336407	30336429	30336497	30336519	30336407	30336519	139_43	43
X_78212885_78212916	70571	2	16	AG	X	32	CTACACGACGCTCTTCCGATCTGAAATTGGCAACACAAAGGGAGC	CAGACGTGTGCTCTTCCGATCTTTCCTTCTCTCTGTTCCCTCACC	78212885	78212916	78212775	78212797	78212923	78212945	78212775	78212945	139_43	43
X_25143461_25143492	70769	2	16	AC	X	32	CTACACGACGCTCTTCCGATCTCCCGGCCTCAAACTTGTTTTTATC	CAGACGTGTGCTCTTCCGATCTTGGGATTTCAGAAGAAGGACTGT	25143461	25143492	25143393	25143416	25143541	25143563	25143393	25143563	139_43	43
X_54508670_54508701	70927	2	16	AC	X	32	CTACACGACGCTCTTCCGATCTCACAAAATAGATCCACGGGGACA	CAGACGTGTGCTCTTCCGATCTAGGCCCTCACAGTAATCAAGGAA	54508670	54508701	54508613	54508635	54508752	54508774	54508613	54508774	139_43	43
X_50696075_50696106	71182	2	16	AC	X	32	CTACACGACGCTCTTCCGATCTAGGAAGCGAAGGTGCAAGAATAG	CAGACGTGTGCTCTTCCGATCTTCCTGAAGCCAAAAACCAAATTTCC	50696075	50696106	50695995	50696017	50696126	50696150	50695995	50696150	139_43	43
X_95188580_95188611	69933	2	16	AC	X	32	CTACACGACGCTCTTCCGATCTTGATAACCCTACAAGCTATGTGCT	CAGACGTGTGCTCTTCCGATCTCCATGTATTTGCTGTGTTTGCCA	95188580	95188611	95188501	95188524	95188613	95188635	95188501	95188635	140_43	43
X_122717428_122717459	69998	2	16	AC	X	32	CTACACGACGCTCTTCCGATCTTCTGCCCCTTATTCTCCCTTCTG	CAGACGTGTGCTCTTCCGATCTTGGACTTGGCAGAAGAATCAGTG	122717428	122717459	122717329	122717351	122717471	122717493	122717329	122717493	140_43	43
X_106043638_106043669	70447	2	16	AC	X	32	CTACACGACGCTCTTCCGATCTGCCATAATAGGCAGATGGGATGG	CAGACGTGTGCTCTTCCGATCTGCCACTGTTTACCAAGACACTGA	106043638	106043669	106043592	106043614	106043724	106043746	106043592	106043746	140_43	43
X_65420084_65420115	70832	2	16	AC	X	32	CTACACGACGCTCTTCCGATCTCCACAGAAACCAAGGAAGGAGAG	CAGACGTGTGCTCTTCCGATCTTCTTTGGGATGAGTGCTCAACTG	65420084	65420115	65420032	65420054	65420182	65420204	65420032	65420204	140_43	43
X_146193403_146193434	70835	2	16	AC	X	32	CTACACGACGCTCTTCCGATCTCCAAGAGCAAACAAATACCTCAGC	CAGACGTGTGCTCTTCCGATCTTTTTTCAAGAAGCCATCTCCTGT	146193403	146193434	146193330	146193353	146193456	146193478	146193330	146193478	140_43	43
X_49115134_49115165	71024	2	16	AC	X	32	CTACACGACGCTCTTCCGATCTATGAGATACTCGACCACCTGAGC	CAGACGTGTGCTCTTCCGATCTCCCTCATAGAGGACACATCCACA	49115134	49115165	49115031	49115053	49115256	49115278	49115031	49115278	140_43	43
X_80352578_80352609	71034	2	16	AC	X	32	CTACACGACGCTCTTCCGATCTATCTGGTGTCTGTGGACCTACAT	CAGACGTGTGCTCTTCCGATCTGGAGGCTGTTGGCTTCTGTATTT	80352578	80352609	80352488	80352510	80352683	80352705	80352488	80352705	140_43	43
X_31727702_31727733	71035	2	16	AC	X	32	CTACACGACGCTCTTCCGATCTATCTGGGTCAGGAATTGGTTGTT	CAGACGTGTGCTCTTCCGATCTTGAAATAAGGACCCCAAACGCAA	31727702	31727733	31727641	31727663	31727753	31727775	31727641	31727775	140_43	43
X_148384686_148384717	71207	2	16	AC	X	32	CTACACGACGCTCTTCCGATCTAGCCTGCTTGTGATCTTTCCTTT	CAGACGTGTGCTCTTCCGATCTTCAGGCATGCTCAAACAGTAAGT	148384686	148384717	148384591	148384613	148384805	148384827	148384591	148384827	140_43	43
X_50353353_50353384	69677	2	16	AC	X	32	CTACACGACGCTCTTCCGATCTTTTTGTGCAAACTGTTCCACCTG	CAGACGTGTGCTCTTCCGATCTTGCCTGGTACACGTTTGTCATTT	50353353	50353384	50353305	50353327	50353409	50353431	50353305	50353431	141_43	43
X_39584140_39584171	69850	2	16	AC	X	32	CTACACGACGCTCTTCCGATCTTGGGTAGTGGTTACCCAAAAAGG	CAGACGTGTGCTCTTCCGATCTTCTTTGGGATTTTGAGCCATGTGA	39584140	39584171	39584074	39584096	39584252	39584275	39584074	39584275	141_43	43
X_109674552_109674583	70118	2	16	AC	X	32	CTACACGACGCTCTTCCGATCTTATTTACCTGGGGGTTTGCAGTG	CAGACGTGTGCTCTTCCGATCTTCAACATGAGCTCTCTCTCCCAA	109674552	109674583	109674467	109674489	109674641	109674663	109674467	109674663	141_43	43
X_104707563_104707594	70122	2	16	AC	X	32	CTACACGACGCTCTTCCGATCTTATGTGAAAACAGGGGATTGGGC	CAGACGTGTGCTCTTCCGATCTTCTCACTGCTGACTACTTGCTTT	104707563	104707594	104707491	104707513	104707631	104707653	104707491	104707653	141_43	43
X_24417400_24417431	70355	2	16	AC	X	32	CTACACGACGCTCTTCCGATCTGGATGATGCTGTGGAAGAAGTGT	CAGACGTGTGCTCTTCCGATCTAGGCATAAGCAGCAACTGACAAT	24417400	24417431	24417326	24417348	24417444	24417466	24417326	24417466	141_43	43
X_68022653_68022684	70853	2	16	AC	X	32	CTACACGACGCTCTTCCGATCTCATCACACCAGGCACTGAACTAA	CAGACGTGTGCTCTTCCGATCTTTTGTATTTCTCCCACCCAACCC	68022653	68022684	68022615	68022637	68022690	68022712	68022615	68022712	141_43	43
X_8233298_8233329	71037	2	16	AC	X	32	CTACACGACGCTCTTCCGATCTATCTGCCGTGTAGTAGGTGCTAT	CAGACGTGTGCTCTTCCGATCTACCGGGAGTCGAGATAAATCAGA	8233298	8233329	8233263	8233285	8233406	8233428	8233263	8233428	141_43	43
X_151974437_151974468	71080	2	16	AC	X	32	CTACACGACGCTCTTCCGATCTAGTTGTCCATCACTGCTCATTCT	CAGACGTGTGCTCTTCCGATCTGACCTACAATTCTGAGGCACCAT	151974437	151974468	151974380	151974402	151974537	151974559	151974380	151974559	141_43	43
X_84920669_84920700	70053	2	16	AC	X	32	CTACACGACGCTCTTCCGATCTTCCACAACTATCTGTCAATTTCCTGT	CAGACGTGTGCTCTTCCGATCTCTATTTTGGGAGGATGAGGGCAG	84920669	84920700	84920620	84920645	84920706	84920728	84920620	84920728	142_43	43
X_87480901_87480932	70153	2	16	AC	X	32	CTACACGACGCTCTTCCGATCTTAGACTGCAGATCTTGGGACTTG	CAGACGTGTGCTCTTCCGATCTACCCAATTAGGGTGTATTAGTCAGA	87480901	87480932	87480842	87480864	87480973	87480997	87480842	87480997	142_43	43
X_111599808_111599839	70536	2	16	AC	X	32	CTACACGACGCTCTTCCGATCTGAGAGAGGGAAGGTTCTGGAAGA	CAGACGTGTGCTCTTCCGATCTAGGAAAGCTGAGAAGCATGAGTA	111599808	111599839	111599706	111599728	111599908	111599930	111599706	111599930	142_43	43
X_12973398_12973429	70771	2	16	AC	X	32	CTACACGACGCTCTTCCGATCTCCCCTGAGAGGAGAACTTAGAGG	CAGACGTGTGCTCTTCCGATCTCGCTACCAGCCTGTCTCTTTATC	12973398	12973429	12973358	12973380	12973449	12973471	12973358	12973471	142_43	43
X_111721324_111721355	70839	2	16	AC	X	32	CTACACGACGCTCTTCCGATCTCCAAACTGCTGGTGCAGATAGAT	CAGACGTGTGCTCTTCCGATCTTCCCTTTATGCACTTCCTTGCTG	111721324	111721355	111721296	111721318	111721422	111721444	111721296	111721444	142_43	43
X_40790342_40790373	71300	2	16	AC	X	32	CTACACGACGCTCTTCCGATCTACTGGAGAGCTCTGTGAGAAAGT	CAGACGTGTGCTCTTCCGATCTCCCTCAGCCAAAGATGGAAAAGA	40790342	40790373	40790262	40790284	40790391	40790413	40790262	40790413	142_43	43
X_30877478_30877509	71472	2	16	AC	X	32	CTACACGACGCTCTTCCGATCTAATTCTACAATGCACAAGGCCGA	CAGACGTGTGCTCTTCCGATCTAGAGCTGGTGATGTGTGATGTAA	30877478	30877509	30877389	30877411	30877532	30877554	30877389	30877554	142_43	43
X_101270359_101270390	54863	2	16	AC	X	32	CTACACGACGCTCTTCCGATCTCCACTCACTGGCCTGGAGATTAT	CAGACGTGTGCTCTTCCGATCTAACGTACAAGGGCTCCAATGTTT	101270359	101270390	101270258	101270280	101270457	101270479	101270258	101270479	143_43	43
Y_16608674_16608705	67681	2	16	AC	Y	32	CTACACGACGCTCTTCCGATCTAAGGGGGAAAAATGTGGTTGGAG	CAGACGTGTGCTCTTCCGATCTTGTCTCCCTTCCTCTCTTCTGTC	16608674	16608705	16608631	16608653	16608722	16608744	16608631	16608744	143_43	43
X_19224014_19224045	69915	2	16	AC	X	32	CTACACGACGCTCTTCCGATCTTGCAGTATTTCCAAACCTTGCAG	CAGACGTGTGCTCTTCCGATCTTCAAAATGAGGGTGTCTGCTGAG	19224014	19224045	19223968	19223990	19224076	19224098	19223968	19224098	143_43	43
X_109092852_109092883	69942	2	16	AC	X	32	CTACACGACGCTCTTCCGATCTTGAGCTGCTTTCATAAGGGTCAC	CAGACGTGTGCTCTTCCGATCTTCTGATCACTCTCACAGGCTAGG	109092852	109092883	109092755	109092777	109092891	109092913	109092755	109092913	143_43	43
X_12922783_12922814	70205	2	16	AC	X	32	CTACACGACGCTCTTCCGATCTGTTTGCTTGACATAGATACTAGACTGT	CAGACGTGTGCTCTTCCGATCTGTGTCAGCCAATTGTAGACCAGT	12922783	12922814	12922684	12922710	12922859	12922881	12922684	12922881	143_43	43
X_98482613_98482644	70302	2	16	AC	X	32	CTACACGACGCTCTTCCGATCTGGGTTCTTTAGAGAAACAGGGCA	CAGACGTGTGCTCTTCCGATCTTCCTTGTCCCTTCTTCTCCCTTT	98482613	98482644	98482581	98482603	98482673	98482695	98482581	98482695	143_43	43
X_79621708_79621739	71094	2	16	AC	X	32	CTACACGACGCTCTTCCGATCTAGTGGTGAGTTTGAGAGAGAGAA	CAGACGTGTGCTCTTCCGATCTAAGGCTTCATAATACATTTGTGGAA	79621708	79621739	79621669	79621691	79621754	79621778	79621669	79621778	143_43	43
X_100121478_100121509	71186	2	16	AC	X	32	CTACACGACGCTCTTCCGATCTAGCTTATGTCAGTGTGTGTGTCC	CAGACGTGTGCTCTTCCGATCTTTGCACCAAGCGAATAGAAGTGT	100121478	100121509	100121454	100121476	100121557	100121579	100121454	100121579	143_43	43
X_42972238_42972269	71391	2	16	AC	X	32	CTACACGACGCTCTTCCGATCTACATGTCAGGAGAGGTACACATTG	CAGACGTGTGCTCTTCCGATCTTGCCATATAACTGGAAATGCAACA	42972238	42972269	42972194	42972217	42972294	42972317	42972194	42972317	143_43	43
Y_14627385_14627416	68760	2	16	AC	Y	32	CTACACGACGCTCTTCCGATCTAACAAAAACCTTTTGCCCCTTCT	CAGACGTGTGCTCTTCCGATCTTGGCTAAACTTTTCTAGGCATGGG	14627385	14627416	14627359	14627381	14627417	14627440	14627359	14627440	144_43	40
X_3951794_3951825	69879	2	16	AC	X	32	CTACACGACGCTCTTCCGATCTTGCTTACCGCATCATTTTGCCTA	CAGACGTGTGCTCTTCCGATCTCAGAACTGCTGGAAAGACAACCT	3951794	3951825	3951724	3951746	3951838	3951860	3951724	3951860	144_43	40
X_129134873_129134904	70089	2	16	AC	X	32	CTACACGACGCTCTTCCGATCTTCAGATAGCCCAGAAGGTTATGC	CAGACGTGTGCTCTTCCGATCTTGGATAAGAACTGAAGTGACGGC	129134873	129134904	129134779	129134801	129134947	129134969	129134779	129134969	144_43	40
X_107027089_107027120	70276	2	16	AC	X	32	CTACACGACGCTCTTCCGATCTGTAGAACTGTTTCATGGAGGCCA	CAGACGTGTGCTCTTCCGATCTTGTCTCTTTACTTGCCTGTGCTC	107027089	107027120	107027004	107027026	107027131	107027153	107027004	107027153	144_43	40
X_16078290_16078321	70360	2	16	AC	X	32	CTACACGACGCTCTTCCGATCTGGAGGCAAAGAGGTTGATCGTTT	CAGACGTGTGCTCTTCCGATCTCTGCCACCTTCCAGGATCATTTT	16078290	16078321	16078205	16078227	16078371	16078393	16078205	16078393	144_43	40
X_113818219_113818250	71294	2	16	AC	X	32	CTACACGACGCTCTTCCGATCTACTGTTGGAAGAATGGGCAAGAG	CAGACGTGTGCTCTTCCGATCTAGATTCATAGCATACCCCTCCCC	113818219	113818250	113818107	113818129	113818253	113818275	113818107	113818275	144_43	40
X_96092433_96092464	71313	2	16	AC	X	32	CTACACGACGCTCTTCCGATCTACTCGCTGATAAGTGGCTTTCTC	CAGACGTGTGCTCTTCCGATCTCAGTGGAGCTGAATTGCTCAAAG	96092433	96092464	96092326	96092348	96092552	96092574	96092326	96092574	144_43	40
X_121980126_121980157	29270	2	16	AG	X	32	CTACACGACGCTCTTCCGATCTGCCCAGCCTGTATTGCATTTTTC	CAGACGTGTGCTCTTCCGATCTAAGAAGTTGAGAGACTGCTTGGG	121980126	121980157	121980045	121980067	121980181	121980203	121980045	121980203	146_42	42
X_72401466_72401497	29384	2	16	AC	X	32	CTACACGACGCTCTTCCGATCTAAACTCCAAAACCTTTCCCCAGG	CAGACGTGTGCTCTTCCGATCTGATGGGTTATTTGCTTGGTTGCC	72401466	72401497	72401414	72401436	72401553	72401575	72401414	72401575	151_42	42
X_22267326_22267357	29385	2	16	AC	X	32	CTACACGACGCTCTTCCGATCTAAAGAGTTGTGAGAAAGAGCAGT	CAGACGTGTGCTCTTCCGATCTAACCCAGCACCTCATGTCTAATG	22267326	22267357	22267242	22267264	22267444	22267466	22267242	22267466	151_42	42
X_116651040_116651071	29383	2	16	AC	X	32	CTACACGACGCTCTTCCGATCTAAACCCCATGGAAGAGAGAAAGC	CAGACGTGTGCTCTTCCGATCTCTGAAAGTGCAGAGGAAAGCTGA	116651040	116651071	116650965	116650987	116651145	116651167	116650965	116651167	153_42	42
X_30581015_30581046	29386	2	16	AC	X	32	CTACACGACGCTCTTCCGATCTAAAGCAAGGATCCCTAGGAAAGA	CAGACGTGTGCTCTTCCGATCTTCAATCTCCTGCTTCTCAGCTTC	30581015	30581046	30580907	30580929	30581103	30581125	30580907	30581125	155_42	42
X_121980126_121980157	29270	2	16	AG	X	32	CTACACGACGCTCTTCCGATCTGCCCAGCCTGTATTGCATTTTTC	CAGACGTGTGCTCTTCCGATCTAAGAAGTTGAGAGACTGCTTGGG	121980126	121980157	121980045	121980067	121980181	121980203	121980045	121980203	86_40	40
X_68121914_68121945	29395	2	16	AG	X	32	CTACACGACGCTCTTCCGATCTAAAACAGAAACCGTGTGAGAGGT	CAGACGTGTGCTCTTCCGATCTTTTTGTCTGCCTCTGTCACACAT	68121914	68121945	68121807	68121829	68122004	68122026	68121807	68122026	96_40	40
X_140880513_140880544	29429	2	16	AT	X	32	CTACACGACGCTCTTCCGATCTACAAAGGCTTAAAGGTGGGAAGA	CAGACGTGTGCTCTTCCGATCTTACAGCATGGCCTTGATCTCTCT	140880513	140880544	140880407	140880429	140880598	140880620	140880407	140880620	97_40	40
X_65129023_65129054	29450	2	16	AT	X	32	CTACACGACGCTCTTCCGATCTATCCGTATGACTGCCTAGTGTCT	CAGACGTGTGCTCTTCCGATCTAAAAGAAATAAGACACCTCCCTGA	65129023	65129054	65128883	65128905	65129084	65129107	65128883	65129107	97_40	40
X_138310493_138310524	29457	2	16	AC	X	32	CTACACGACGCTCTTCCGATCTAAAGCTCAAGGTGGGAAAGATGG	CAGACGTGTGCTCTTCCGATCTACTGATGAATGCTCAGACTGGGA	138310493	138310524	138310387	138310409	138310566	138310588	138310387	138310588	97_40	40
X_38852384_38852415	29462	2	16	AC	X	32	CTACACGACGCTCTTCCGATCTATGGAAAGGGGCTAATTGTACCG	CAGACGTGTGCTCTTCCGATCTTCAAGCTTTTCTGCCTCATTTGC	38852384	38852415	38852329	38852351	38852475	38852497	38852329	38852497	97_40	40
X_83994005_83994036	29464	2	16	AG	X	32	CTACACGACGCTCTTCCGATCTAAACCCGGGAAGGCAATAGATTC	CAGACGTGTGCTCTTCCGATCTGCAGGTTTGGGAAAGAGGAGATT	83994005	83994036	83993969	83993991	83994070	83994092	83993969	83994092	97_40	40
X_5448574_5448605	29465	2	16	AC	X	32	CTACACGACGCTCTTCCGATCTAAAGTGACCACCCCATGATCCTA	CAGACGTGTGCTCTTCCGATCTATGGACTGGTTTTTCTTTCAGGA	5448574	5448605	5448515	5448537	5448722	5448744	5448515	5448744	98_40	40
X_5448616_5448647	29465	2	16	AG	X	32	CTACACGACGCTCTTCCGATCTAAAGTGACCACCCCATGATCCTA	CAGACGTGTGCTCTTCCGATCTATGGACTGGTTTTTCTTTCAGGA	5448616	5448647	5448515	5448537	5448722	5448744	5448515	5448744	98_40	40
X_20554151_20554182	35146	2	16	AC	X	32	CTACACGACGCTCTTCCGATCTTGCTTTGAAAAGTGTGTCTCTGT	CAGACGTGTGCTCTTCCGATCTAGAATCAACATAAGGCCCACAGT	20554151	20554182	20554127	20554149	20554264	20554286	20554127	20554286	126_40	40
X_14303041_14303072	70298	2	16	AC	X	32	CTACACGACGCTCTTCCGATCTGGTAGAATCAGCCAAGGAATGGG	CAGACGTGTGCTCTTCCGATCTTACAGTTCATCTTGTGGAGGGGA	14303041	14303072	14303018	14303040	14303124	14303146	14303018	14303146	127_40	40
X_127489608_127489637	69676	2	15	AC	X	30	CTACACGACGCTCTTCCGATCTTTTTGTTATGCGTAGGCAGTCCT	CAGACGTGTGCTCTTCCGATCTAGGAATGCTGTATAAGTACTCTCAGTG	127489608	127489637	127489525	127489547	127489696	127489722	127489525	127489722	136_43	43
X_133380035_133380064	69784	2	15	AC	X	30	CTACACGACGCTCTTCCGATCTTGTTTCCAAGCTTCTGCTTTCTCT	CAGACGTGTGCTCTTCCGATCTACGTGCCAAAGACATATTTGCTTAC	133380035	133380064	133379950	133379973	133380147	133380171	133379950	133380171	136_43	43
X_7960220_7960249	70054	2	15	AG	X	30	CTACACGACGCTCTTCCGATCTTCCAATGGAGTAGGCATGCAAAG	CAGACGTGTGCTCTTCCGATCTGGATTGAGGTGAATCAGTCCAGC	7960220	7960249	7960111	7960133	7960330	7960352	7960111	7960352	136_43	43
X_108780789_108780818	70100	2	15	AC	X	30	CTACACGACGCTCTTCCGATCTTCACAGTTCTTAGGCAAACAGCA	CAGACGTGTGCTCTTCCGATCTAAAAGGAGAGAGAGCGGCAAAAA	108780789	108780818	108780694	108780716	108780900	108780922	108780694	108780922	136_43	43
X_104556297_104556326	70127	2	15	AC	X	30	CTACACGACGCTCTTCCGATCTTATCCCCCATCACTCTTTGTGGA	CAGACGTGTGCTCTTCCGATCTTGTTTTGGGACTACCATGGATAAA	104556297	104556326	104556259	104556281	104556411	104556434	104556259	104556434	136_43	43
X_66940722_66940751	70229	2	15	AC	X	30	CTACACGACGCTCTTCCGATCTGTGGGTGTCAAATTTCCTTCCCT	CAGACGTGTGCTCTTCCGATCTTTTCAAGGAAGAGCAACCTCTCG	66940722	66940751	66940666	66940688	66940840	66940862	66940666	66940862	136_43	43
X_99010278_99010307	70645	2	15	AC	X	30	CTACACGACGCTCTTCCGATCTCTCTCAACCACCTGAAACAGACC	CAGACGTGTGCTCTTCCGATCTAGTACTTCTGCCCCAGAGTTAGG	99010278	99010307	99010244	99010266	99010343	99010365	99010244	99010365	136_43	43
X_124453504_124453533	70646	2	15	AC	X	30	CTACACGACGCTCTTCCGATCTCTCTCAAACCCACCTTCCCTTTC	CAGACGTGTGCTCTTCCGATCTTAAAGTGGCTATTTGCACACCCG	124453504	124453533	124453472	124453494	124453553	124453575	124453472	124453575	136_43	43
X_135239146_135239175	70775	2	15	AC	X	30	CTACACGACGCTCTTCCGATCTCCCCCAGGTTTCTCAGAGACTAA	CAGACGTGTGCTCTTCCGATCTTCCACTGCTCTGGCTTAGTGATA	135239146	135239175	135239118	135239140	135239214	135239236	135239118	135239236	136_43	43
X_107959184_107959213	71133	2	15	AC	X	30	CTACACGACGCTCTTCCGATCTAGGTTGTTCTTTCTTTGGCCTCA	CAGACGTGTGCTCTTCCGATCTATTGAAGAGATGGAGCTCAGGGT	107959184	107959213	107959076	107959098	107959272	107959294	107959076	107959294	136_43	43
X_6405746_6405775	71308	2	15	AC	X	30	CTACACGACGCTCTTCCGATCTACTCTTCTGGTCTCTGTGTCTCC	CAGACGTGTGCTCTTCCGATCTTGGAAATATGCTTGGAGGTTGGG	6405746	6405775	6405661	6405683	6405836	6405858	6405661	6405858	136_43	43
X_33358630_33358659	71420	2	15	AC	X	30	CTACACGACGCTCTTCCGATCTACAGACAGCTGGTTTCATAGTTACA	CAGACGTGTGCTCTTCCGATCTTGTATGAGTACTTGCACACAAAG	33358630	33358659	33358517	33358541	33358661	33358683	33358517	33358683	136_43	43
X_143076076_143076105	71565	2	15	AC	X	30	CTACACGACGCTCTTCCGATCTAACATTTTAGGGGGACACAAGCA	CAGACGTGTGCTCTTCCGATCTTGGTCCAAAGGTTTTGTAAGTGA	143076076	143076105	143075993	143076015	143076107	143076129	143075993	143076129	136_43	43
X_80640169_80640198	69679	2	15	AC	X	30	CTACACGACGCTCTTCCGATCTTTTTGCAACTGTGTTCATCCAGG	CAGACGTGTGCTCTTCCGATCTTGAGGAGGGAATCCAAACTCATT	80640169	80640198	80640131	80640153	80640239	80640261	80640131	80640261	137_43	43
X_138702157_138702186	69803	2	15	AC	X	30	CTACACGACGCTCTTCCGATCTTGTGTAGGTTCGTATATGAGGACA	CAGACGTGTGCTCTTCCGATCTGGATAATTCACCAGAGAGCTGGG	138702157	138702186	138702082	138702105	138702260	138702282	138702082	138702282	137_43	43
X_117039469_117039498	70681	2	15	AC	X	30	CTACACGACGCTCTTCCGATCTCTAAGCCTCCCCTAGTTTCCCAT	CAGACGTGTGCTCTTCCGATCTTTGGACCAAAGGAAACCTAAGCC	117039469	117039498	117039363	117039385	117039520	117039542	117039363	117039542	137_43	43
X_7790736_7790765	71089	2	15	AC	X	30	CTACACGACGCTCTTCCGATCTAGTTCCTGACACAGAGTAGCTCA	CAGACGTGTGCTCTTCCGATCTATTGCATCCTTTTGCTCCCATCT	7790736	7790765	7790629	7790651	7790802	7790824	7790629	7790824	137_43	43
X_8285466_8285495	71168	2	15	AC	X	30	CTACACGACGCTCTTCCGATCTAGGCACATGCCAGAAACAAAAC	CAGACGTGTGCTCTTCCGATCTACTACTTACTTCTGCATCAGACAA	8285466	8285495	8285381	8285402	8285507	8285530	8285381	8285530	137_43	43
X_62228850_62228879	62182	2	15	AC	X	30	CTACACGACGCTCTTCCGATCTAGCCAAACAAGAATGCAATGACA	CAGACGTGTGCTCTTCCGATCTCCATTTGTTTGTGCTACCCACAG	62228850	62228879	62228816	62228838	62228956	62228978	62228816	62228978	138_43	43
X_138775643_138775672	71099	2	15	AC	X	30	CTACACGACGCTCTTCCGATCTAGTGCAAAAGGCAGAGTGAGTAG	CAGACGTGTGCTCTTCCGATCTTGAAAAAGCAAGGCTAGGGGAAG	138775643	138775672	138775613	138775635	138775698	138775720	138775613	138775720	138_43	43
X_150245797_150245826	71149	2	15	AG	X	30	CTACACGACGCTCTTCCGATCTAGGGATATTCAGTGCAGGGTTCT	CAGACGTGTGCTCTTCCGATCTTAGTATACTCCTGTCCAGGCTCG	150245797	150245826	150245688	150245710	150245827	150245849	150245688	150245849	138_43	43
X_110329290_110329319	71250	2	15	AC	X	30	CTACACGACGCTCTTCCGATCTAGAGAGAAGACTGTGATGTCAGC	CAGACGTGTGCTCTTCCGATCTCACAAACAGCGCCTCAAAGAATA	110329290	110329319	110329266	110329288	110329399	110329421	110329266	110329421	138_43	43
X_144682909_144682938	56081	2	15	AC	X	30	CTACACGACGCTCTTCCGATCTCAGGAAGACAATCCCTAAGACACG	CAGACGTGTGCTCTTCCGATCTTAACAGGCCTGCTGTTAGCTTG	144682909	144682938	144682836	144682859	144683002	144683023	144682836	144683023	139_43	43
X_150066000_150066029	69731	2	15	AC	X	30	CTACACGACGCTCTTCCGATCTTTGCAAAAGTGGCTTGGCTAGTA	CAGACGTGTGCTCTTCCGATCTCCCAGCTGGTGGAAAATATGTGA	150066000	150066029	150065910	150065932	150066039	150066061	150065910	150066061	139_43	43
X_136222834_136222863	69808	2	15	AC	X	30	CTACACGACGCTCTTCCGATCTTGTGCTACTGTGACTCAGGATGT	CAGACGTGTGCTCTTCCGATCTGTACAAGGCCAAAGTGAGTGGAA	136222834	136222863	136222793	136222815	136222896	136222918	136222793	136222918	139_43	43
X_114764719_114764748	70467	2	15	AC	X	30	CTACACGACGCTCTTCCGATCTGCATGACCGTGTCTCAAAAATGG	CAGACGTGTGCTCTTCCGATCTGAGATATTTGCTTGGAAGCCCCA	114764719	114764748	114764611	114764633	114764778	114764800	114764611	114764800	139_43	43
X_78515438_78515467	70484	2	15	AC	X	30	CTACACGACGCTCTTCCGATCTGCACTTGTCAATTGGCCTAGGAA	CAGACGTGTGCTCTTCCGATCTGCTGTGTTCAAGTGGGATGTGTA	78515438	78515467	78515384	78515406	78515534	78515556	78515384	78515556	139_43	43
X_78212855_78212884	70571	2	15	AC	X	30	CTACACGACGCTCTTCCGATCTGAAATTGGCAACACAAAGGGAGC	CAGACGTGTGCTCTTCCGATCTTTCCTTCTCTCTGTTCCCTCACC	78212855	78212884	78212775	78212797	78212923	78212945	78212775	78212945	139_43	43
X_15288204_15288233	70677	2	15	AC	X	30	CTACACGACGCTCTTCCGATCTCTACCTGTGATCAGAGAGAGGCA	CAGACGTGTGCTCTTCCGATCTATCAGCAACTTCGCAGACTTAGG	15288204	15288233	15288170	15288192	15288285	15288307	15288170	15288307	139_43	43
X_65332003_65332032	70760	2	15	AC	X	30	CTACACGACGCTCTTCCGATCTCCCTGTGTGGTGAAAAGATGTGT	CAGACGTGTGCTCTTCCGATCTCGACAGTTCAGCCTTATCCTCTG	65332003	65332032	65331969	65331991	65332077	65332099	65331969	65332099	139_43	43
X_63218212_63218241	70789	2	15	AC	X	30	CTACACGACGCTCTTCCGATCTCCCAGCCAACACCATAGACTTTT	CAGACGTGTGCTCTTCCGATCTCGCTTTGTGGAATTATCGTTGGG	63218212	63218241	63218178	63218200	63218260	63218282	63218178	63218282	139_43	43
X_71214149_71214178	70878	2	15	AC	X	30	CTACACGACGCTCTTCCGATCTCAGCCTGATTGGAGGAAAGATGG	CAGACGTGTGCTCTTCCGATCTCTGCCTCCTCTTCAGCTTGATTT	71214149	71214178	71214085	71214107	71214251	71214273	71214085	71214273	139_43	43
X_111819701_111819730	71003	2	15	AC	X	30	CTACACGACGCTCTTCCGATCTATGGGATGATAGTGGAGGAGTGT	CAGACGTGTGCTCTTCCGATCTTGAGTTCATTGTAATCAAACAAAACAA	111819701	111819730	111819661	111819683	111819810	111819836	111819661	111819836	139_43	43
X_29979017_29979046	71157	2	15	AC	X	30	CTACACGACGCTCTTCCGATCTAGGCTCAGAACATAAAACATGCC	CAGACGTGTGCTCTTCCGATCTAACATGAGTTTGTCAGTGGACCC	29979017	29979046	29978994	29979016	29979098	29979120	29978994	29979120	139_43	43
X_45461896_45461925	71319	2	15	AC	X	30	CTACACGACGCTCTTCCGATCTACTCACTGAGCACCTACTATCCC	CAGACGTGTGCTCTTCCGATCTGACAGCGATAAAGACAAGAGGCA	45461896	45461925	45461859	45461881	45461930	45461952	45461859	45461952	139_43	43
X_62337793_62337822	53719	2	15	AC	X	30	CTACACGACGCTCTTCCGATCTCCCTGATACCAAAATCAGGTAAGGG	CAGACGTGTGCTCTTCCGATCTTGCACTTGGGTTCATCAGGGATA	62337793	62337822	62337767	62337791	62337850	62337872	62337767	62337872	140_43	43
X_109387033_109387062	69711	2	15	AC	X	30	CTACACGACGCTCTTCCGATCTTTGTCTGTCCTGGCATACTTTGG	CAGACGTGTGCTCTTCCGATCTGAAACAGTTGGGTGGCTAACTCA	109387033	109387062	109387009	109387031	109387148	109387170	109387009	109387170	140_43	43
X_86952772_86952801	70075	2	15	AC	X	30	CTACACGACGCTCTTCCGATCTTCATCAGCATCAAACAAGGTAGCA	CAGACGTGTGCTCTTCCGATCTGAAATGGTAGCCAATTCTGGCCT	86952772	86952801	86952671	86952694	86952848	86952870	86952671	86952870	140_43	43
X_116923786_116923815	70647	2	15	AC	X	30	CTACACGACGCTCTTCCGATCTCTCTATCTGCCTGCTCTGTTGAC	CAGACGTGTGCTCTTCCGATCTAGATGAGGATTGGCAGGAGAGTT	116923786	116923815	116923752	116923774	116923842	116923864	116923752	116923864	140_43	43
X_41807554_41807583	70721	2	15	AC	X	30	CTACACGACGCTCTTCCGATCTCCTGGAGGTGATCATGTTAGCAG	CAGACGTGTGCTCTTCCGATCTTGTATGCATGTGACTTGTGTATGC	41807554	41807583	41807529	41807551	41807604	41807627	41807529	41807627	140_43	43
Y_18556557_18556586	33588	2	15	AC	Y	30	CTACACGACGCTCTTCCGATCTTGTCCTGTATTTTTGCATGTGTGC	CAGACGTGTGCTCTTCCGATCTAAGACGCATAAGTAAAGAAAGAACG	18556557	18556586	18556531	18556554	18556656	18556680	18556531	18556680	141_43	43
X_27122556_27122585	69801	2	15	AC	X	30	CTACACGACGCTCTTCCGATCTTGTGTGGTGGAAATTTGGTGGAT	CAGACGTGTGCTCTTCCGATCTAGCAAGTCCTCTTGATACCAGAT	27122556	27122585	27122457	27122479	27122588	27122610	27122457	27122610	141_43	43
X_69070988_69071017	70114	2	15	AC	X	30	CTACACGACGCTCTTCCGATCTTCAAACATTTACACCAAAACGTCACA	CAGACGTGTGCTCTTCCGATCTAAATTGAGCAGGGTGAGAAGACC	69070988	69071017	69070944	69070969	69071109	69071131	69070944	69071131	141_43	43
X_146606736_146606765	70116	2	15	AC	X	30	CTACACGACGCTCTTCCGATCTTATTTTCTCCCTCTTCCCACCTCC	CAGACGTGTGCTCTTCCGATCTCACTGCATGTCTTTGTGCATGAG	146606736	146606765	146606705	146606728	146606824	146606846	146606705	146606846	141_43	43
X_55292223_55292252	70724	2	15	AC	X	30	CTACACGACGCTCTTCCGATCTCCTGCTAGCTTGTAAATGGCAGA	CAGACGTGTGCTCTTCCGATCTGGACAGTGCTGAAGAGAAGTGAG	55292223	55292252	55292134	55292156	55292285	55292307	55292134	55292307	141_43	43
X_28785833_28785862	70930	2	15	AC	X	30	CTACACGACGCTCTTCCGATCTCAATCTTATCTGAGCCTGGGGGA	CAGACGTGTGCTCTTCCGATCTTGCTTAGCTTTTGAATATGAACACACA	28785833	28785862	28785810	28785832	28785871	28785897	28785810	28785897	141_43	43
X_27994480_27994509	70959	2	15	AC	X	30	CTACACGACGCTCTTCCGATCTCAAAATGTCATGCAAAGGCGAGT	CAGACGTGTGCTCTTCCGATCTAGGTCCCTCAAGGGAGAAATTGA	27994480	27994509	27994425	27994447	27994518	27994540	27994425	27994540	141_43	43
X_53743876_53743905	70982	2	15	AC	X	30	CTACACGACGCTCTTCCGATCTATTCAGTCAGCTCTGAAACCACC	CAGACGTGTGCTCTTCCGATCTTTGAGCTTTCATAACCTGCTGCT	53743876	53743905	53743773	53743795	53743939	53743961	53743773	53743961	141_43	43
X_25992534_25992563	71059	2	15	AT	X	30	CTACACGACGCTCTTCCGATCTATATGGGATCTACCTGGTTGCCC	CAGACGTGTGCTCTTCCGATCTGCTCTGCACATATCTGCCTAACT	25992534	25992563	25992482	25992504	25992639	25992661	25992482	25992661	141_43	43
Y_9465139_9465168	58344	2	15	AC	Y	30	CTACACGACGCTCTTCCGATCTATGTGAGTTTGGCTGTGAGTACC	CAGACGTGTGCTCTTCCGATCTGTGGAGATCCTGCCAATTCACTC	9465139	9465168	9465079	9465101	9465204	9465226	9465079	9465226	142_43	43
X_146811910_146811939	70193	2	15	AC	X	30	CTACACGACGCTCTTCCGATCTTAAATCAGCTGCTATGTGCCAGG	CAGACGTGTGCTCTTCCGATCTCTTCTTCGCACTAGACAATGAGC	146811910	146811939	146811855	146811877	146811943	146811965	146811855	146811965	142_43	43
X_84768208_84768237	70313	2	15	AC	X	30	CTACACGACGCTCTTCCGATCTGGGGTAAAAGGACAGAGATGAAGG	CAGACGTGTGCTCTTCCGATCTCTAGGGAAAAGCTGGTGTCACTC	84768208	84768237	84768128	84768151	84768253	84768275	84768128	84768275	142_43	43
X_94352145_94352174	71457	2	15	AC	X	30	CTACACGACGCTCTTCCGATCTACAACCCAAGTGTCTATCAGTGT	CAGACGTGTGCTCTTCCGATCTGATGCTGCAAAAGGCAAGATTGT	94352145	94352174	94352083	94352105	94352216	94352238	94352083	94352238	142_43	43
X_9205636_9205665	71458	2	15	AC	X	30	CTACACGACGCTCTTCCGATCTACAACCATTGCAAAGATGGTTTC	CAGACGTGTGCTCTTCCGATCTGAATGCCGGATGCTTGACTTCTA	9205636	9205665	9205612	9205634	9205758	9205780	9205612	9205780	142_43	43
X_103089439_103089468	38543	2	15	AC	X	30	CTACACGACGCTCTTCCGATCTTCGGTAGATAGAAGGCCAAACCA	CAGACGTGTGCTCTTCCGATCTCTTCCTGAAGCTCAGGTCAATGT	103089439	103089468	103089375	103089397	103089530	103089552	103089375	103089552	143_43	43
X_78941059_78941088	43260	2	15	AG	X	30	CTACACGACGCTCTTCCGATCTGTCGAAGACTCTTGTTCTCTTCCC	CAGACGTGTGCTCTTCCGATCTGCTGCTTGTATCACCTCACTACC	78941059	78941088	78941010	78941033	78941146	78941168	78941010	78941168	143_43	43
X_114170540_114170569	69839	2	15	AC	X	30	CTACACGACGCTCTTCCGATCTTGTACCAACTGAGGGTCTTGGAA	CAGACGTGTGCTCTTCCGATCTCTGGGCTAAGTTCAAGGTGTGTT	114170540	114170569	114170483	114170505	114170652	114170674	114170483	114170674	143_43	43
X_12469853_12469882	70084	2	15	AC	X	30	CTACACGACGCTCTTCCGATCTTCAGGCTGTTAGCACAGTCATTT	CAGACGTGTGCTCTTCCGATCTGGGACACAGACAGGAATGGAAAA	12469853	12469882	12469740	12469762	12469903	12469925	12469740	12469925	143_43	43
X_79381091_79381120	70094	2	15	AC	X	30	CTACACGACGCTCTTCCGATCTTCACCTATAGCTCAATCCAAGTTGC	CAGACGTGTGCTCTTCCGATCTTAAGTGCTCATCATCCCACAAGC	79381091	79381120	79381022	79381046	79381166	79381188	79381022	79381188	143_43	43
X_38341966_38341995	70341	2	15	AC	X	30	CTACACGACGCTCTTCCGATCTGGCTGGTATAAGGAACTTGGTCA	CAGACGTGTGCTCTTCCGATCTACAAGTCCCACAGTGATTTCCTC	38341966	38341995	38341912	38341934	38342010	38342032	38341912	38342032	143_43	43
X_108839805_108839834	46731	2	15	AC	X	30	CTACACGACGCTCTTCCGATCTGCGTGATCTCTCTCTTTCTCCCT	CAGACGTGTGCTCTTCCGATCTTCTCCTTTCCCATCCTGCACATA	108839805	108839834	108839764	108839786	108839843	108839865	108839764	108839865	144_43	40
X_136627227_136627256	70207	2	15	AC	X	30	CTACACGACGCTCTTCCGATCTGTTTGACACAAAAGCCTGTGCAT	CAGACGTGTGCTCTTCCGATCTTTATGAGGACTCCAGTTTGGCCT	136627227	136627256	136627153	136627175	136627290	136627312	136627153	136627312	144_43	40
X_95045954_95045983	70660	2	15	AT	X	30	CTACACGACGCTCTTCCGATCTCTCCATCAGAACTTCTCAGCCTC	CAGACGTGTGCTCTTCCGATCTACATCCATTGAACACCAAGTTCCA	95045954	95045983	95045864	95045886	95046044	95046067	95045864	95046067	144_43	40
X_68765907_68765936	70824	2	15	AC	X	30	CTACACGACGCTCTTCCGATCTCCACTCTTTCAAGAACCTTGGCT	CAGACGTGTGCTCTTCCGATCTGAATCTTCAACCTCTGCCAGCTT	68765907	68765936	68765810	68765832	68765952	68765974	68765810	68765974	144_43	40
X_40235064_40235093	70887	2	15	AC	X	30	CTACACGACGCTCTTCCGATCTCAGAGTAAGCACACAGTAGGCAG	CAGACGTGTGCTCTTCCGATCTTAGCACACACTTTTCCACCACAA	40235064	40235093	40235023	40235045	40235140	40235162	40235023	40235162	144_43	40
X_53593095_53593124	71074	2	15	AT	X	30	CTACACGACGCTCTTCCGATCTATAAGGTGTGTGAGACCAACCAG	CAGACGTGTGCTCTTCCGATCTTCAGAGACTGCCATCTTGGTACT	53593095	53593124	53592966	53592988	53593136	53593158	53592966	53593158	144_43	40
X_50515009_50515038	71237	2	15	AC	X	30	CTACACGACGCTCTTCCGATCTAGATCTGAAAAGATTTCTGCAACG	CAGACGTGTGCTCTTCCGATCTACCTCCTAGAGGTAACAGGCATT	50515009	50515038	50514924	50514947	50515087	50515109	50514924	50515109	144_43	40
X_53081785_53081814	71399	2	15	AC	X	30	CTACACGACGCTCTTCCGATCTACATCTGGCTGTGTGTGTTTCAT	CAGACGTGTGCTCTTCCGATCTACCTCTGTGTATGCCTGTCTGAA	53081785	53081814	53081695	53081717	53081842	53081864	53081695	53081864	144_43	40
X_114632330_114632359	71452	2	15	AC	X	30	CTACACGACGCTCTTCCGATCTACAATGAAATGACATGAAATCTTGAG	CAGACGTGTGCTCTTCCGATCTACAAGCTCTTCAGTTGCAAAACA	114632330	114632359	114632302	114632327	114632421	114632443	114632302	114632443	144_43	40
X_22704245_22704274	71484	2	15	AC	X	30	CTACACGACGCTCTTCCGATCTAATGACCTCACATACACCCCAGT	CAGACGTGTGCTCTTCCGATCTATGGATGTTTTCTGGAGAGGTGC	22704245	22704274	22704150	22704172	22704302	22704324	22704150	22704324	144_43	40
X_103035368_103035397	71511	2	15	AC	X	30	CTACACGACGCTCTTCCGATCTAAGTCCTACCTCAGCTTCCCAAT	CAGACGTGTGCTCTTCCGATCTGGCAACAGCATCTGGACTATCTT	103035368	103035397	103035298	103035320	103035431	103035453	103035298	103035453	144_43	40
X_152774487_152774516	29159	2	15	AG	X	30	CTACACGACGCTCTTCCGATCTCTTCTGTTCTCTCTTTCCCCGTC	CAGACGTGTGCTCTTCCGATCTGAAGCGAGAAAGGTCTGAGGAAG	152774487	152774516	152774460	152774482	152774571	152774593	152774460	152774593	147_42	42
X_46058167_46058196	29390	2	15	AC	X	30	CTACACGACGCTCTTCCGATCTAACAATAGCAACTACCACTGTGT	CAGACGTGTGCTCTTCCGATCTAGTGCCTGCATTCCCTTAGGA	46058167	46058196	46058129	46058151	46058289	46058309	46058129	46058309	151_42	42
X_16094674_16094703	29388	2	15	AC	X	30	CTACACGACGCTCTTCCGATCTAAACAGCTGTAGTCCATTGAGGG	CAGACGTGTGCTCTTCCGATCTAAAAATCCTGCTTTTTCCTCTGC	16094674	16094703	16094625	16094647	16094792	16094814	16094625	16094814	152_42	42
X_126758525_126758554	29389	2	15	AC	X	30	CTACACGACGCTCTTCCGATCTAAATGCTGCTGATACTTCTGCCA	CAGACGTGTGCTCTTCCGATCTCATTCCCACTTTGCATTCTGCTG	126758525	126758554	126758464	126758486	126758607	126758629	126758464	126758629	152_42	42
X_30984901_30984930	29050	2	15	AT	X	30	CTACACGACGCTCTTCCGATCTATAGGAACCCGGCATTCAGAAGA	CAGACGTGTGCTCTTCCGATCTTGTTGTCTGTGTACTCATAATTGCCA	30984901	30984930	30984862	30984884	30985010	30985035	30984862	30985035	153_42	42
X_68364563_68364592	29387	2	15	AC	X	30	CTACACGACGCTCTTCCGATCTAAAACACCTGTGTTGGTGTCCAT	CAGACGTGTGCTCTTCCGATCTAGGAATGAGGAGGATGTTTGTGC	68364563	68364592	68364439	68364461	68364604	68364626	68364439	68364626	154_42	42
X_152774487_152774516	29159	2	15	AG	X	30	CTACACGACGCTCTTCCGATCTCTTCTGTTCTCTCTTTCCCCGTC	CAGACGTGTGCTCTTCCGATCTGAAGCGAGAAAGGTCTGAGGAAG	152774487	152774516	152774460	152774482	152774571	152774593	152774460	152774593	84_40	40
X_79414100_79414129	29466	2	15	AG	X	30	CTACACGACGCTCTTCCGATCTAGCTCCTTCTCTAGACCCTGCTA	CAGACGTGTGCTCTTCCGATCTAAGCTTAAGGCTACAGGTCATGC	79414100	79414129	79414042	79414064	79414235	79414257	79414042	79414257	98_40	40
X_79414131_79414160	29466	2	15	AC	X	30	CTACACGACGCTCTTCCGATCTAGCTCCTTCTCTAGACCCTGCTA	CAGACGTGTGCTCTTCCGATCTAAGCTTAAGGCTACAGGTCATGC	79414131	79414160	79414042	79414064	79414235	79414257	79414042	79414257	98_40	40
X_127409560_127409589	29467	2	15	AT	X	30	CTACACGACGCTCTTCCGATCTAACACCTTCACACAACAGGATCT	CAGACGTGTGCTCTTCCGATCTTCTTGTACATGGGAAGAGAGTTCA	127409560	127409589	127409474	127409496	127409652	127409675	127409474	127409675	98_40	40
X_127409590_127409619	29467	2	15	AG	X	30	CTACACGACGCTCTTCCGATCTAACACCTTCACACAACAGGATCT	CAGACGTGTGCTCTTCCGATCTTCTTGTACATGGGAAGAGAGTTCA	127409590	127409619	127409474	127409496	127409652	127409675	127409474	127409675	98_40	40
X_107586365_107586394	29487	2	15	AT	X	30	CTACACGACGCTCTTCCGATCTAGGAAAGGAAAAGAGCGCTATGA	CAGACGTGTGCTCTTCCGATCTACTTATGGGCACCATGTCAACTC	107586365	107586394	107586327	107586349	107586451	107586473	107586327	107586473	98_40	40
X_140528830_140528859	29712	2	15	AC	X	30	CTACACGACGCTCTTCCGATCTGGCTCTATTCCATTACTACGGGG	CAGACGTGTGCTCTTCCGATCTAGGAAAACGGGTATGAAGGAGGA	140528830	140528859	140528752	140528774	140528898	140528920	140528752	140528920	100_40	40
1_70530323_70530352	29798	3	10	AAC	1	30	CTACACGACGCTCTTCCGATCTAGTACTTTTTGGCACTGCTTGGT	CAGACGTGTGCTCTTCCGATCTTGTGACTAGTGCATGAGTTTCTCT	70530323	70530352	70530297	70530319	70530368	70530391	70530297	70530391	145_42	42
X_33280042_33280071	28812	3	10	ACC	X	30	CTACACGACGCTCTTCCGATCTAACAGCAAAGTGGTGGAACAGAT	CAGACGTGTGCTCTTCCGATCTTCATGGTTGAATCATTGTGGTTGT	33280042	33280071	33279929	33279951	33280072	33280095	33279929	33280095	146_42	42
X_65220065_65220094	28819	3	10	AGC	X	30	CTACACGACGCTCTTCCGATCTATTGCTGCAAGAACTGGAGAGAG	CAGACGTGTGCTCTTCCGATCTGGAGGAGGAGGAACAGAACAAAC	65220065	65220094	65220004	65220026	65220096	65220118	65220004	65220118	147_42	42
X_21544905_21544934	28748	3	10	AAC	X	30	CTACACGACGCTCTTCCGATCTCAGCCAAGTTCAAAAACTGCAGAA	CAGACGTGTGCTCTTCCGATCTCATACGCACACAAACAACACACA	21544905	21544934	21544849	21544872	21544938	21544960	21544849	21544960	150_42	42
X_19603809_19603838	28829	3	10	AGC	X	30	CTACACGACGCTCTTCCGATCTAATCTAGAGCAATGGGTGTCACG	CAGACGTGTGCTCTTCCGATCTCCTGGAGAACTTGTTCAAAGCAG	19603809	19603838	19603764	19603786	19603913	19603935	19603764	19603935	150_42	42
X_139676238_139676267	28841	3	10	AGT	X	30	CTACACGACGCTCTTCCGATCTCTTCATTGGCGGTAGTAGTGGTG	CAGACGTGTGCTCTTCCGATCTACATGCAAAGTGCTTAGGGTACT	139676238	139676267	139676203	139676225	139676292	139676314	139676203	139676314	151_42	42
17_13499164_13499193	29838	3	10	AAC	17	30	CTACACGACGCTCTTCCGATCTAATTGTTCAACTGTGTCCCGGAG	CAGACGTGTGCTCTTCCGATCTTCATGAGAAGAGTGTTGCAGAGC	13499164	13499193	13499123	13499145	13499214	13499236	13499123	13499236	151_42	42
X_150025043_150025072	28782	3	10	AAT	X	30	CTACACGACGCTCTTCCGATCTAATGTTCCAGAGGAGGCTTTCC	CAGACGTGTGCTCTTCCGATCTGGATCACACAGCGTGTAGTCTTT	150025043	150025072	150024929	150024950	150025073	150025095	150024929	150025095	154_42	42
X_110946414_110946443	28797	3	10	AGT	X	30	CTACACGACGCTCTTCCGATCTCTTTCATTGTTGTGGCTGCTTCA	CAGACGTGTGCTCTTCCGATCTAACATCTAACCAACAGGAAGCCC	110946414	110946443	110946329	110946351	110946482	110946504	110946329	110946504	155_42	42
11_114823148_114823177	29808	3	10	AAC	11	30	CTACACGACGCTCTTCCGATCTAAGATAATGGGGAGGAGGGAGTG	CAGACGTGTGCTCTTCCGATCTACCAACTTGTCTTTGTCATCGGT	114823148	114823177	114823078	114823100	114823234	114823256	114823078	114823256	156_42	11
X_99664708_99664737	28851	3	10	CCG	X	30	CTACACGACGCTCTTCCGATCTGTGCTTCTCTTCTCTCCGTTTGG	CAGACGTGTGCTCTTCCGATCTATGAAATCAAGACGCTCCTGCAA	99664708	99664737	99664664	99664686	99664829	99664851	99664664	99664851	96_40	40
X_145248517_145248546	28731	3	10	AAG	X	30	CTACACGACGCTCTTCCGATCTGAAGGCCAATATTCATGTGCGTG	CAGACGTGTGCTCTTCCGATCTCACTGGCCTTCTGTTTCTCTCTC	145248517	145248546	145248358	145248380	145248568	145248590	145248358	145248590	117_40	40
X_69721264_69721291	70241	2	14	AC	X	28	CTACACGACGCTCTTCCGATCTGTGCTGTTCAAGTTGTCTGTTGG	CAGACGTGTGCTCTTCCGATCTTCCCAATGTTTCAGGAACTGACC	69721264	69721291	69721223	69721245	69721295	69721317	69721223	69721317	136_43	43
X_38973543_38973570	70254	2	14	AC	X	28	CTACACGACGCTCTTCCGATCTGTCTTGGTTGACAGCCTGTTCTT	CAGACGTGTGCTCTTCCGATCTTCACATGTAATCCCACCATCTTGA	38973543	38973570	38973493	38973515	38973610	38973633	38973493	38973633	136_43	43
X_150871932_150871959	70410	2	14	AC	X	28	CTACACGACGCTCTTCCGATCTGCTGACTCTTTCGTGGCTACATT	CAGACGTGTGCTCTTCCGATCTATATAGCTGCACACCGGCTATTG	150871932	150871959	150871888	150871910	150872003	150872025	150871888	150872025	136_43	43
X_9218806_9218833	70465	2	14	AC	X	28	CTACACGACGCTCTTCCGATCTGCATTACAGCAGGAGAGAGATGG	CAGACGTGTGCTCTTCCGATCTCTTGAATGAGTTTACACGGCTGC	9218806	9218833	9218735	9218757	9218836	9218858	9218735	9218858	136_43	43
X_130534811_130534838	70662	2	14	AC	X	28	CTACACGACGCTCTTCCGATCTCTCCACTCCCTATTACACACACG	CAGACGTGTGCTCTTCCGATCTCACTCACAGTTTGGGTAGAGCAA	130534811	130534838	130534778	130534800	130534919	130534941	130534778	130534941	136_43	43
X_45146087_45146114	70983	2	14	AC	X	28	CTACACGACGCTCTTCCGATCTATTCAAAGGGGCTGATATGCCTT	CAGACGTGTGCTCTTCCGATCTTGTTCATCAGACCTTCCCTCCTT	45146087	45146114	45146064	45146086	45146170	45146192	45146064	45146192	136_43	43
X_66030838_66030865	71049	2	14	AC	X	28	CTACACGACGCTCTTCCGATCTATCCATCCAGGTTGCAGCAAATA	CAGACGTGTGCTCTTCCGATCTCCCAAATGCCCATTGATCAGTCA	66030838	66030865	66030735	66030757	66030895	66030917	66030735	66030917	136_43	43
X_149693429_149693456	71139	2	14	AC	X	28	CTACACGACGCTCTTCCGATCTAGGTGAAGATAACGTGGCAAGAC	CAGACGTGTGCTCTTCCGATCTCCACAGGTGGCAAGAACTCTTAT	149693429	149693456	149693401	149693423	149693470	149693492	149693401	149693492	136_43	43
X_121688589_121688616	71143	2	14	AC	X	28	CTACACGACGCTCTTCCGATCTAGGGTATTCAGTCAAATCTGTTGT	CAGACGTGTGCTCTTCCGATCTTCAGCATTGAAGTTGCTGGAAGT	121688589	121688616	121688548	121688571	121688689	121688711	121688548	121688711	136_43	43
X_48571964_48571991	71320	2	14	AC	X	28	CTACACGACGCTCTTCCGATCTACTCACATCCTGGACATACACCA	CAGACGTGTGCTCTTCCGATCTGATGTGAGGTCCCCGTTCTTTTT	48571964	48571991	48571893	48571915	48572027	48572049	48571893	48572049	136_43	43
Y_2780633_2780660	55721	2	14	AC	Y	28	CTACACGACGCTCTTCCGATCTCATACAGACCAGGAGAGAGCAGA	CAGACGTGTGCTCTTCCGATCTTCTGATGGTGTTGACTTCTCTGA	2780633	2780660	2780576	2780598	2780742	2780764	2780576	2780764	137_43	43
X_147710623_147710650	69859	2	14	AC	X	28	CTACACGACGCTCTTCCGATCTTGGCCTCAGGTGAATTACAACTAT	CAGACGTGTGCTCTTCCGATCTTCAGAGGCTAATCAGTCCTGTCC	147710623	147710650	147710587	147710610	147710734	147710756	147710587	147710756	137_43	43
X_144379580_144379607	69887	2	14	AC	X	28	CTACACGACGCTCTTCCGATCTTGCTGGCACAGAAAGAATCATGT	CAGACGTGTGCTCTTCCGATCTGCAATTTTTGACTGGATGGCGAA	144379580	144379607	144379508	144379530	144379652	144379674	144379508	144379674	137_43	43
X_147977101_147977128	69928	2	14	AC	X	28	CTACACGACGCTCTTCCGATCTTGATGTTCTGGCTGTGAACAGTG	CAGACGTGTGCTCTTCCGATCTTGTGCCAATCAGTAATGCACAGA	147977101	147977128	147977060	147977082	147977191	147977213	147977060	147977213	137_43	43
X_22703328_22703355	69945	2	14	AC	X	28	CTACACGACGCTCTTCCGATCTTGAGCAGTCCTAGCTCAAAACTT	CAGACGTGTGCTCTTCCGATCTCCCTTGTACCCATTAGCACTCAC	22703328	22703355	22703287	22703309	22703448	22703470	22703287	22703470	137_43	43
[truncated: 807 more rows]
